# Supplementary material for: Ecophysiology and global dispersal of the freshwater SAR11-IIIb clade
Source: Research Square preprint supplement (doi:10.21203/rs.3.rs-6457240/v1), 2025-06-23
Supplement: Supplementary file 1 [file dcfd75f5962c6050df3580c2.xlsx]

## Sheet: index
Table S1: Sampling details for newly sequenced metagenomes.
Table S2: Details on genomes used in this study. Newly sequenced genomes from cultures and MAGs are highlighted in bold.
Table S3: List of TIGRFAMs used for phylogenomic tree reconstruction
Table S4: Average nucleotide identity (ANI) matrix of all genomes used in this study. SAR11 lineages I-IIIa and species IIIb.1-16 are color-coded as in Fig. 1. Proposed species boundaries are shown with bold borders.
Table S5: Average amino acid identity (AAI) matrix of all genomes used in this study. SAR11 lineages I-IIIa and species IIIb.1-16 are color-coded as in Fig. 1.
Table S6: Metagenomic fragment recruitment results for 16 Allofontibacter species. Subsampled metagenomes (20 mio reads) from six continents (n=620) were used for mapping.
Table S7: Metagenomic fragment recruitment results for 16 Allofontibacter species in time series metagenomes. Subsampled time series metagenomes (20 mio reads) from six lakes (n=559) were used for mapping.
Table S8: Physico-chemical data for time series metagenomes.
Table S9. Statistical tests for seasonal distribution of Allofontibacter species. Dominant species in each lake based on loadings of RDA axis 1 and forward selection of environmental parameters, Spearman correlations with the respective parameters (* p<0.05).
Table S10: Media components
Table S11: Raw data of growth assays conducted in this study. Growth assays were conducted for two strains (ME-17 and MiE-29) in triplicates, shown are abundances (cells/ml) at different time points (h) and different conditions. Maximum growth rates for each condition are highlighted in bold.
Table S12. ANOVA and post-hoc tests (Turkey-HSD) for growth assays based on maximum abundances.
Table S13. ANOVA and post-hoc tests (Turkey-HSD) for growth assays based on maximum growth rates.
Table S14: Overview of metabolic pathways present in the culture genomes
Table S15: Presence/absence of individual KEGG IDs (metabolic pathways) detected in different Allofontibacter species

## Sheet: S1_Sampling_details
Table S1: Sampling details for newly sequenced metagenomes.
Abbreviation	ENA Study ID	ENA Sample accession number	Illumina metagenome accession number	Nanopore metagenome accession number	Sampling date	Sampling Location	Country	Continent	Climatic zone	Latitude	Longitude	Elevation (m asl)	Size (km2)	Max. depth (m)	Sampling depth (m)	Trophic state	Lake type	Other details
Balt1-05jul22	PRJEB86004	ERS23657665	ERR14789964	ERR14822383	2022-07-05	Vistula lagoon, freshwater part	Poland	Europe	Temperate	54.2545	19.3832	2.9	838	2.9	1.5	eutrophic	Coastal lagoon	Freshwater part of coastal lagoon
Balt2-05jul22	PRJEB86004	ERS23657666	ERR14789965	ERR14822384	2022-07-05	Vistula lagoon, brackish part	Poland	Europe	Temperate	54.3227	19.429	3.1	838	2.8	1.5	eutrophic	Coastal lagoon	Brackish part of coastal lagoon
Balt3-05jul22	PRJEB86004	ERS23657668	ERR14789966	ERR14822385	2022-07-05	Vistula river	Poland	Europe	Temperate	54.2568	18.9491	10.3	NA	0.5	0.5	NA	River	River close to the river mouth
Balt4-05jul22	PRJEB86004	ERS23657669	ERR14789967	ERR14822386	2022-07-05	Baltic Sea, Pier Sopot	Poland	Europe	Temperate	54.4486	18.5781	2.9	377000	6.9	0.5	eutrophic	Coastal Baltic Sea	Coastal Baltic Sea, water taken from a pier
BiE-22sep22	PRJEB86003	ERS23657623	ERR14789926	ERR14822388	2022-09-22	Biwa	Japan	Asia	Subtropical	35.2276	136.025	85.6	669	103	5	mesotrophic	Tectonic lake	Monomictic lake
BiH-22sep22	PRJEB86003	ERS23657624	ERR14789927	ERR14822389	2022-09-22	Biwa	Japan	Asia	Subtropical	35.2276	136.025	85.6	669	103	50	mesotrophic	Tectonic lake	Monomictic lake
ChE-26sep22	PRJEB86003	ERS23657627	ERR14789930	ERR14822390	2022-09-26	Chuzenji	Japan	Asia	Subtropical	36.7371	139.469	1269	11.8	163	5	oligotrophic	Tectonic lake	Dimictic lake
ChH-26sep22	PRJEB86003	ERS23657628	ERR14789931	ERR14822391	2022-09-26	Chuzenji	Japan	Asia	Subtropical	36.7371	139.469	1269	11.8	163	120	oligotrophic	Tectonic lake	Dimictic lake
InaE-25sep22	PRJEB86003	ERS23657625	ERR14789928	ERR14822394	2022-09-25	Inawashiro	Japan	Asia	Temperate	37.4747	140.099	514	103.3	94	5	oligotrophic	Tectonic lake	Monomictic lake
InaH-25sep22	PRJEB86003	ERS23657626	ERR14789929	ERR14822395	2022-09-25	Inawashiro	Japan	Asia	Temperate	37.4747	140.099	514	103.3	94	80	oligotrophic	Tectonic lake	Monomictic lake
ToyE-29sep22	PRJEB86003	ERS23657629	ERR14789932	ERR14822420	2022-09-29	Toya	Japan	Asia	Temperate	42.5966	140.829	84	70.7	180	5	mesotrophic	Caldera lake	Dimictic lake
ToyH-29sep22	PRJEB86003	ERS23657630	ERR14789933	ERR14822421	2022-09-29	Toya	Japan	Asia	Temperate	42.5966	140.829	84	70.7	180	150	mesotrophic	Caldera lake	Dimictic lake
SamE-20apr23	PRJEB86002	ERS23657654	ERR14789955	ERR14822417	2023-04-20	Samsonvale	Australia	Australia	Subtropical	-27.2633	152.937	39.63	21.8	35.1	5	mesotrophic	Reservoir	Warm monomictic lake
SamH-20apr23	PRJEB86002	ERS23657655	ERR14789956	ERR14822418	2023-04-20	Samsonvale	Australia	Australia	Subtropical	-27.2633	152.937	39.63	21.8	35.1	15	mesotrophic	Reservoir	Warm monomictic lake
WiE-21apr23	PRJEB86002	ERS23657656	ERR14789957	ERR14822423	2023-04-21	Wivenhoe	Australia	Australia	Subtropical	-27.3939	152.608	79	107.5	60	2	mesotrophic	Reservoir	Warm monomictic lake
BarE-26apr23	PRJEB86002	ERS23657657	ERR14789958	ERR14822387	2023-04-26	Baroon	Australia	Australia	Subtropical	-26.7033	152.868	22	4	15	5	mesotrophic	Reservoir	Warm monomictic lake
MdE-27apr23	PRJEB86002	ERS23657658	ERR14789959	ERR14822404	2023-04-27	Monduran	Australia	Australia	Subtropical	-24.8734	151.847	75.56	53.4	43	5	mesotrophic	Reservoir	Warm monomictic lake
BmE-01may23	PRJEB86002	ERS23657661	ERR14789960		2023-05-01	Boomanjin	Australia	Australia	Subtropical	-25.5457	153.075	109	1.9	5	2	NA	Perched dune lake	Black water dune lake, acidic
McKE-02may23	PRJEB86002	ERS23657662	ERR14789961	ERR14822403	2023-05-02	McKenzie	Australia	Australia	Subtropical	-25.4457	153.054	100	1.5	8	5	oligotrophic	Perched dune lake	Clear water dune lake, acidic
WaE-03may23	PRJEB86002	ERS23657663	ERR14789962	ERR14822422	2023-05-03	Wabby	Australia	Australia	Subtropical	-25.4576	153.13	67	NA	12	2	eutrophic	Window dune lake	Dune lake with neutral pH
CoE-06may23	PRJEB86002	ERS23657664	ERR14789963	ERR14822392	2023-05-06	Cootharaba	Australia	Australia	Subtropical	-26.3021	152.997	2	38	2	0.5	NA	Coastal lagoon	brackish lagoon
Mw1-16nov23	PRJEB86001	ERS23657641	ERR14789943	ERR14822407	2023-11-16	Malawi, Station 1 Karonga	Malawi	Africa	Tropical	-9.99072	33.9793	468	29600	80	5	oligotrophic	Rift lake	Meromictic lake
Mw2-16nov23	PRJEB86001	ERS23657642	ERR14789944	ERR14822411	2023-11-16	Malawi, Station 1 Karonga	Malawi	Africa	Tropical	-9.99072	33.9793	468	29600	80	50	oligotrophic	Rift lake	Meromictic lake
Mw5-13nov23	PRJEB86001	ERS23657643	ERR14789945	ERR14822412	2023-11-13	Malawi, Station 2 Nkhata Bay	Malawi	Africa	Tropical	-11.5843	34.3481	468	29600	700	5	oligotrophic	Rift lake	Meromictic lake
Mw6-13nov23	PRJEB86001	ERS23657644	ERR14789946	ERR14822413	2023-11-13	Malawi, Station 2 Nkhata Bay	Malawi	Africa	Tropical	-11.5843	34.3481	468	29600	700	50	oligotrophic	Rift lake	Meromictic lake
Mw7-13nov23	PRJEB86001	ERS23657645	ERR14789947	ERR14822414	2023-11-13	Malawi, Station 2 Nkhata Bay	Malawi	Africa	Tropical	-11.5843	34.3481	468	29600	700	100	oligotrophic	Rift lake	Meromictic lake
Mw8-13nov23	PRJEB86001	ERS23657647	ERR14789948	ERR14822415	2023-11-13	Malawi, Station 2 Nkhata Bay	Malawi	Africa	Tropical	-11.5843	34.3481	468	29600	700	200	oligotrophic	Rift lake	Meromictic lake
Mw9-20nov23	PRJEB86001	ERS23657648	ERR14789949	ERR14822416	2023-11-20	Malawi, Station 3 Nkhotakota	Malawi	Africa	Tropical	-12.8726	34.3497	468	29600	120	5	oligotrophic	Rift lake	Meromictic lake
Mw10-20nov23	PRJEB86001	ERS23657649	ERR14789950	ERR14822405	2023-11-20	Malawi, Station 3 Nkhotakota	Malawi	Africa	Tropical	-12.8726	34.3497	468	29600	120	50	oligotrophic	Rift lake	Meromictic lake
Mw11-20nov23	PRJEB86001	ERS23657650	ERR14789951	ERR14822406	2023-11-20	Malawi, Station 3 Nkhotakota	Malawi	Africa	Tropical	-12.8726	34.3497	468	29600	120	100	oligotrophic	Rift lake	Meromictic lake
Mw13-23nov23	PRJEB86001	ERS23657651	ERR14789952	ERR14822408	2023-11-23	Malawi, Station 4 Cape Maclear	Malawi	Africa	Tropical	-13.9319	34.8179	468	29600	120	5	oligotrophic	Rift lake	Meromictic lake
Mw14-23nov23	PRJEB86001	ERS23657652	ERR14789953	ERR14822409	2023-11-23	Malawi, Station 4 Cape Maclear	Malawi	Africa	Tropical	-13.9319	34.8179	468	29600	120	50	oligotrophic	Rift lake	Meromictic lake
Mw15-23nov23	PRJEB86001	ERS23657653	ERR14789954	ERR14822410	2023-11-23	Malawi, Station 4 Cape Maclear	Malawi	Africa	Tropical	-13.9319	34.8179	468	29600	120	100	oligotrophic	Rift lake	Meromictic lake
LaRo1-16jan24	PRJEB86000	ERS23657631	ERR14789934	ERR14822400	2024-01-16	Laguna de Rocha, Station 1	Uruguay	South America	Subtropical	-34.6382	-54.2774	1	72	1.5	0.5	eutrophic	Coastal lagoon	Brackish part of coastal lagoon
LaRo2-16jan24	PRJEB86000	ERS23657633	ERR14789935	ERR14822401	2024-01-16	Laguna de Rocha, Station 2	Uruguay	South America	Subtropical	-34.5805	-54.2763	1	72	0.5	0.5	eutrophic	Coastal lagoon	Slightly brackish part of coastal lagoon
LaRo3-16jan24	PRJEB86000	ERS23657634	ERR14789936	ERR14822402	2024-01-16	Laguna de Rocha, Station 3	Uruguay	South America	Subtropical	-34.5753	-54.2861	1	72	0.7	0.5	eutrophic	Coastal lagoon	Almost freshwater part of coastal lagoon
LaCa1-17jan24	PRJEB86000	ERS23657635	ERR14789937	ERR14822397	2024-01-17	Laguna de Castillos, Station 1	Uruguay	South America	Subtropical	-34.3499	-53.939	1	72	0.8	0.5	eutrophic	Coastal lagoon	Almost freshwater part of coastal lagoon
LaCa2-17jan24	PRJEB86000	ERS23657636	ERR14789938	ERR14822398	2024-01-17	Laguna de Castillos, Station 2	Uruguay	South America	Subtropical	-34.348	-53.8799	1	80	0.9	0.5	eutrophic	Coastal lagoon	Brackish part of coastal lagoon
LaBr-23jan24	PRJEB86000	ERS23657637	ERR14789939	ERR14822396	2024-01-23	Laguna de Briozzo	Uruguay	South America	Subtropical	-34.2947	-53.8053	1	80	3.5	2	eutrophic	Coastal lagoon	Freshwater lagoon
LaNe-23jan24	PRJEB86000	ERS23657638	ERR14789940	ERR14822399	2024-01-23	Laguna Negra	Uruguay	South America	Subtropical	-34.0084	-53.597	1	187	0.7	0.5	eutrophic	Coastal lagoon	Freshwater lagoon
IMU-22jan24	PRJEB86000	ERS23657639	ERR14789941	ERR14822393	2024-01-22	Represa de India Muerta	Uruguay	South America	Subtropical	-33.92	-54.2718	39	35	10	0.5	eutrophic	Reservoir	Freshwater reservoir
SAMO-19jan24	PRJEB86000	ERS23657640	ERR14789942	ERR14822419	2024-01-19	South American Marine Observatory	Uruguay	South America	Subtropical	-34.7	-54.2667	0			0.5	oligotrophic	Atlantic Ocean	Coastal marine station
AE-03may19	PRJEB35770	ERS4065074	ERR3719149		2019-05-03	Attersee	Austria	Europe	Temperate	47.8667	13.5333	469	46.2	171	5	Ultraoligotrophic	Natural lake	Dimictic lake
AH-03may19	PRJEB35770	ERS4065075	ERR3719150		2019-05-03	Attersee	Austria	Europe	Temperate	47.8667	13.5333	469	46.2	171	150	Ultraoligotrophic	Natural lake	Dimictic lake
AH-24oct19	PRJEB35770	ERS6344541	ERR5863101		2019-10-24	Attersee	Austria	Europe	Temperate	47.8667	13.5333	469	46.2	171	150	Ultraoligotrophic	Natural lake	Dimictic lake
LE-02apr19	PRJEB35770	ERS4065070	ERR3719145		2019-04-02	Lugano	Italy	Europe	Temperate	45.9994	8.99925	271	28	288	5	Eutrophic	Natural lake	Meromictic lake
LE-05nov19	PRJEB35770	ERS6344544	ERR5863104		2019-11-05	Lugano	Italy	Europe	Temperate	45.9994	8.99925	271	28	288	5	Eutrophic	Natural lake	Meromictic lake
LH-02apr19	PRJEB35770	ERS4065071	ERR3719146		2019-04-02	Lugano	Italy	Europe	Temperate	45.9994	8.99925	271	28	288	50	Eutrophic	Natural lake	Meromictic lake
LH-05nov19	PRJEB35770	ERS6344545	ERR5863105		2019-11-05	Lugano	Italy	Europe	Temperate	45.9994	8.99925	271	28	288	50	Eutrophic	Natural lake	Meromictic lake
MaE-04nov19	PRJEB35770	ERS4065068	ERR5863106		2019-11-04	Maggiore	Italy	Europe	Temperate	45.9667	8.65	193	212.5	370	5	Oligo-mesotrophic	Natural lake	Monomictic lake
ME-04may21	PRJEB35770	ERS20515698	ERS20515698	ERR13385611	2021-05-04	Medard	Czechia	Europe	Temperate	50.1788	12.5971	400	4.9	50	5	Oligo-mesotrophic	Postmining lake	Dimictic, sometimes meromictic lake
MH-08apr19	PRJEB35770	ERS4065079	ERR3719154		2019-04-08	Medard	Czechia	Europe	Temperate	50.1788	12.5971	400	4.9	50	30	Oligo-mesotrophic	Postmining lake	Dimictic, sometimes meromictic lake
MiH-16apr19	PRJEB35770	ERS4065081	ERR3719156		2019-04-16	Milada	Czechia	Europe	Temperate	50.6545	13.9498	137	2.5	20	15	Oligo-mesotrophic	Postmining lake	Dimictic lake
MiH-22jul19	PRJEB35770	ERS4065087	ERR3719163		2019-07-22	Milada	Czechia	Europe	Temperate	50.6545	13.9498	137	2.5	20	15	Oligo-mesotrophic	Postmining lake	Dimictic lake
MoE-02may19	PRJEB35770	ERS4065072	ERR3719147		2019-05-02	Mondsee	Austria	Europe	Temperate	47.8061	13.4037	483	14.2	68	5	Mesotrophic	Natural lake	Dimictic lake
MoE-23oct19	PRJEB35770	ERS6344552	ERR5863112		2019-10-23	Mondsee	Austria	Europe	Temperate	47.8061	13.4037	483	14.2	68	5	Mesotrophic	Natural lake	Dimictic lake
MoH-02may19	PRJEB35770	ERS4065073	ERR3719148		2019-05-02	Mondsee	Austria	Europe	Temperate	47.8061	13.4037	483	14.2	68	40	Mesotrophic	Natural lake	Dimictic lake
MoH-23oct19	PRJEB35770	ERS6344553	ERR5863113		2019-10-23	Mondsee	Austria	Europe	Temperate	47.8061	13.4037	483	14.2	68	40	Mesotrophic	Natural lake	Dimictic lake
MsE-30jul19	PRJEB35770	ERS4065089	ERR3719164	ERR13385610	2019-07-30	Most	Czechia	Europe	Temperate	50.5367	13.6452	199	3.11	75	5	Oligo-mesotrophic	Postmining lake	Dimictic lake
MsH-30apr19	PRJEB35770	ERS4065083	ERR3719158		2019-04-30	Most	Czechia	Europe	Temperate	50.5367	13.6452	199	3.11	75	60	Oligo-mesotrophic	Postmining lake	Dimictic lake
MsH-30jul19	PRJEB35770	ERS4065090	ERR3719165		2019-07-30	Most	Czechia	Europe	Temperate	50.5367	13.6452	199	3.11	75	60	Oligo-mesotrophic	Postmining lake	Dimictic lake
MsH-01oct19	PRJEB35770	ERS6344555	ERR5863115		2019-10-01	Most	Czechia	Europe	Temperate	50.5367	13.6452	199	3.11	75	60	Oligo-mesotrophic	Postmining lake	Dimictic lake
TE-08apr19	PRJEB35770	ERS4065064	ERR3719139		2019-04-08	Thun	Switzerland	Europe	Temperate	46.6833	7.71667	558	48.3	217	5	Ultraoligotrophic	Natural lake	Monomictic lake
TE-11nov19	PRJEB35770	ERS6344556	ERR5863116		2019-11-11	Thun	Switzerland	Europe	Temperate	46.6833	7.71667	558	48.3	217	5	Ultraoligotrophic	Natural lake	Monomictic lake
TH-11nov19	PRJEB35770	ERS6344557	ERR5863117		2019-11-11	Thun	Switzerland	Europe	Temperate	46.6833	7.71667	558	48.3	217	150	Ultraoligotrophic	Natural lake	Monomictic lake
TrE-03may19	PRJEB35770	ERS4065076	ERR3719151		2019-05-03	Traunsee	Austria	Europe	Temperate	47.8667	13.8	423	24.4	191	5	Oligotrophic	Natural lake	Monomictic lake with chloride deposition in deep hypolimnion
TrE-25oct19	PRJEB35770	ERS6344558	ERR5863118		2019-10-25	Traunsee	Austria	Europe	Temperate	47.8667	13.8	423	24.4	191	5	Oligotrophic	Natural lake	Monomictic lake with chloride deposition in deep hypolimnion
TrH-25oct19	PRJEB35770	ERS6344559	ERR5863119		2019-10-25	Traunsee	Austria	Europe	Temperate	47.8667	13.8	423	24.4	191	5	Oligotrophic	Natural lake	Monomictic lake with chloride deposition in deep hypolimnion
ZE-03apr19	PRJEB35770	ERS4065062	ERR12709013	ERS4065062	2019-04-03	Zurich	Switzerland	Europe	Temperate	47.3051	8.57353	406	88.7	136	5	Oligo-mesotrophic	Natural lake	Monomictic lake
ZE-13nov19	PRJEB35770	ERS6344560	ERR5863120	ERS6344560	2019-11-13	Zurich	Switzerland	Europe	Temperate	47.3051	8.57353	406	88.7	136	5	Oligo-mesotrophic	Natural lake	Monomictic lake
ZH-03apr19	PRJEB35770	ERS4065063	ERR3719138		2019-04-03	Zurich	Switzerland	Europe	Temperate	47.3051	8.57353	406	88.7	136	80	Oligo-mesotrophic	Natural lake	Monomictic lake
ZH-13nov19	PRJEB35770	ERS6344561	ERR5863121		2019-11-13	Zurich	Switzerland	Europe	Temperate	47.3051	8.57353	406	88.7	136	80	Oligo-mesotrophic	Natural lake	Monomictic lake

## Sheet: S2_Genomes
Table S2: Details on genomes used in this study. Newly sequenced genomes from cultures and MAGs are highlighted in bold.
Genome	Notes	SAR11-lineage	Proposed taxonomy	GTDB_classification	Accession No.	Climatic Zone	Isolate/MAG/SAG	Habitat	Location	Completeness	Contamination	Strain heterogeneity	GC	GENOME_LENGTH	NUM_CONTIGS	TOTAL_CDS	MEDIAN_CDS	MEAN_CDS	CODING_DENSITY	NONCODING_DENSITY	MEDIAN_INTERGENIC_SPACER	MEAN_INTERGENIC_SPACER	NUM_SIGMA	NUM_RHODOPSINS	16S_rRNA	5S_rRNA	23S_rRNA	Num_tRNA
MED605		SAR11-I		d__Bacteria;p__Pseudomonadota;c__Alphaproteobacteria;o__Pelagibacterales;f__Pelagibacteraceae;g__GCA-2689925;s__GCA-2689925 sp002689925	GCA_002689925.1	Subtropical	MAG	Marine	Mediterranean Sea	91.57	3.61	0	29.133	1605601	73	1723	249	290.82	96.67	3.33	5	31.81	1	1	0	2	0	30
MED-G108		SAR11-I		d__Bacteria;p__Pseudomonadota;c__Alphaproteobacteria;o__Pelagibacterales;f__Pelagibacteraceae;g__AG-414-E02;s__AG-414-E02 sp004213215	GCA_004213215.1	Subtropical	MAG	Marine	Mediterranean Sea	81.05	0	0	29.043	979451	53	1030	263	295.42	97.1	2.9	6	28.571	1	2	0	1	0	16
3300020262_24		SAR11-I		d__Bacteria;p__Pseudomonadota;c__Alphaproteobacteria;o__Pelagibacterales;f__Pelagibacteraceae;g__AAA240-E13;s__AAA240-E13 sp002690285	_	Tropical	MAG	Marine	Arabian Sea (TARA_039)	89.96	0	0	30.565	1184877	52	1225	266	301.88	96.33	3.67	8	36.3333	1	1	1	1	0	25
MED-G107		SAR11-I		d__Bacteria;p__Pseudomonadota;c__Alphaproteobacteria;o__Pelagibacterales;f__Pelagibacteraceae;g__MED-G107;s__MED-G107 sp004213155	GCA_004213155.1	Subtropical	MAG	Marine	Mediterranean Sea	59.89	0	0	27.9	754510	45	798	258	290.77	97.16	2.84	5	28.2309	0	1	1	0	0	5
SCGC_AAA795-D22		SAR11-I		d__Bacteria;p__Pseudomonadota;c__Alphaproteobacteria;o__Pelagibacterales;f__Pelagibacteraceae;g__Pelagibacter;s__Pelagibacter sp902587665	GCF_001179925.1	Tropical	SAG	Marine	Red Sea	68.88	2.14	0	28.987	801227	63	824	264	297.77	97.07	2.93	3	29.665	3	0	1	1	1	14
SCGC_AAA795-M22		SAR11-I		d__Bacteria;p__Pseudomonadota;c__Alphaproteobacteria;o__Pelagibacterales;f__Pelagibacteraceae;g__Pelagibacter;s__Pelagibacter ubique_K	GCF_001180105.1	Tropical	SAG	Marine	Red Sea	81.93	1.31	50	29.428	860157	80	919	257	286.74	96.99	3.01	2	29.4914	2	1	1	1	1	22
SCGC_AAA795-F16		SAR11-I		d__Bacteria;p__Pseudomonadota;c__Alphaproteobacteria;o__Pelagibacterales;f__Pelagibacteraceae;g__Pelagibacter;s__Pelagibacter ubique_J	GCF_001179985.1	Tropical	SAG	Marine	Red Sea	75.5	0	0	29.071	945491	74	1008	252	291.3	97.15	2.85	3	27.6561	3	0	1	0	1	27
AG-426-E17		SAR11-I		d__Bacteria;p__Pseudomonadota;c__Alphaproteobacteria;o__Pelagibacterales;f__Pelagibacteraceae;g__Pelagibacter;s__Pelagibacter sp003210095	GCA_003210095.1	Subtropical	SAG	Marine	North Atlantic Ocean	100	0.11	0	28.702	1151069	5	1206	268	305.99	96.88	3.12	3	29.1272	4	1	1	1	1	32
3300027685-46		SAR11-I		d__Bacteria;p__Pseudomonadota;c__Alphaproteobacteria;o__Pelagibacterales;f__Pelagibacteraceae;g__Pelagibacter;s__Pelagibacter sp012963775	_	Temperate	MAG	Marine	Southern Atlantic Ocean	93.37	2.41	0	28.461	1043479	88	1078	264	296.96	97.23	2.77	3	28.631	1	0	0	0	0	18
SCGC_AAA795-M18		SAR11-I		d__Bacteria;p__Pseudomonadota;c__Alphaproteobacteria;o__Pelagibacterales;f__Pelagibacteraceae;g__Pelagibacter;s__Pelagibacter sp002101295	GCF_001180085.1	Tropical	SAG	Marine	Red Sea	58.84	0.6	100	29.219	1050527	61	1074	265	302.53	96.32	3.68	3	37.1848	3	0	1	1	1	18
RS40		SAR11-I		d__Bacteria;p__Pseudomonadota;c__Alphaproteobacteria;o__Pelagibacterales;f__Pelagibacteraceae;g__Pelagibacter;s__Pelagibacter sp002101295	GCF_002101295.1	Tropical	Isolate	Marine	Red Sea	100	0	0	29.433	1378905	1	1406	281	315.24	96.88	3.12	4	29.9833	3	1	1	1	1	31
GOM-A1		SAR11-I		d__Bacteria;p__Pseudomonadota;c__Alphaproteobacteria;o__Pelagibacterales;f__Pelagibacteraceae;g__Pelagibacter;s__Pelagibacter sp001704065	GCA_001704065.1	Subtropical	SAG	Marine	Gulf of Mexico	93.98	1.2	100	29.335	1329341	71	1382	269.5	299.21	96.56	3.44	3	34.0685	3	1	1	1	1	26
AG-470-G21		SAR11-I		d__Bacteria;p__Pseudomonadota;c__Alphaproteobacteria;o__Pelagibacterales;f__Pelagibacteraceae;g__Pelagibacter;s__Pelagibacter sp003211555	GCA_003211555.1	Subtropical	SAG	Marine	Pacific Ocean	84.34	0	0	29.311	1113470	34	1158	273	300.76	96.28	3.72	3	36.1721	3	1	1	1	1	20
HTCC9565		SAR11-I		d__Bacteria;p__Pseudomonadota;c__Alphaproteobacteria;o__Pelagibacterales;f__Pelagibacteraceae;g__Pelagibacter;s__Pelagibacter ubique_S	GCF_012932795.1	Subtropical	Isolate	Marine	Oregon Coast	99.05	0	0	28.923	1279674	3	1354	268	300.91	96.14	3.86	5	35.8096	1	1	1	1	1	30
P.Giovannonii		SAR11-I		d__Bacteria;p__Pseudomonadota;c__Alphaproteobacteria;o__Pelagibacterales;f__Pelagibacteraceae;g__Pelagibacter;s__Pelagibacter giovannonii	GCF_012276695.1	Subtropical	Isolate	Marine	Northeast Pacific Ocean	99.05	0.63	0	29.548	1365705	1	1464	261	297.59	96.16	3.84	4	35.0663	4	1	1	1	1	31
HTCC1062		SAR11-I		d__Bacteria;p__Pseudomonadota;c__Alphaproteobacteria;o__Pelagibacterales;f__Pelagibacteraceae;g__Pelagibacter;s__Pelagibacter ubique	GCF_000012345.1	Temperate	Isolate	Marine	Coastal Pacific Ocean	100	0.47	0	29.683	1308759	1	1350	270	310.02	96.38	3.62	4	34.3341	4	1	1	1	1	32
HTCC1002		SAR11-I		d__Bacteria;p__Pseudomonadota;c__Alphaproteobacteria;o__Pelagibacterales;f__Pelagibacteraceae;g__Pelagibacter;s__Pelagibacter ubique	GCF_000153525.1	Temperate	Isolate	Marine	Coastal Pacific Ocean	100	0.47	0	29.737	1328618	4	1376	263.5	304.84	95.57	4.43	4	41.8839	4	1	1	1	1	32
SFB_27D_13Oct24_20_ms_bin_5		SAR11-I		d__Bacteria;p__Pseudomonadota;c__Alphaproteobacteria;o__Pelagibacterales;f__Pelagibacteraceae;g__Pelagibacter;s__Pelagibacter ubique	GCA_025994995.1	Temperate	MAG	Brackish	San Francisco Bay, USA	85.69	2.37	16.67	29.608	1035612	74	1096	256	288.19	96.55	3.45	3	34.2586	1	1	0	0	0	24
HTCC1040		SAR11-I		d__Bacteria;p__Pseudomonadota;c__Alphaproteobacteria;o__Pelagibacterales;f__Pelagibacteraceae;g__Pelagibacter;s__Pelagibacter ubique	GCF_000384455.1	Temperate	Isolate	Marine	Coastal Pacific Ocean	100	0.47	0	29.546	1274624	1	1339	274	304.05	96.36	3.64	4	33.9328	1	1	1	1	1	31
HTCC1013		SAR11-I		d__Bacteria;p__Pseudomonadota;c__Alphaproteobacteria;o__Pelagibacterales;f__Pelagibacteraceae;g__Pelagibacter;s__Pelagibacter ubique	GCF_000472585.1	Temperate	Isolate	Marine	Coastal Pacific Ocean	100	0.47	0	29.671	1300696	4	1348	268	306.52	96.16	3.84	4	36.3445	5	1	1	1	1	32
HIMB5		SAR11-I		d__Bacteria;p__Pseudomonadota;c__Alphaproteobacteria;o__Pelagibacterales;f__Pelagibacteraceae;g__Pelagibacter;s__Pelagibacter sp000299095	GCA_000299095.1	Temperate	Isolate	Marine	Pacific Ocean	100	0.48	0	28.632	1343202	1	1432	261	301.01	96.67	3.33	3	30.5468	3	1	1	1	1	30
SCGC_AAA795-C09		SAR11-I		d__Bacteria;p__Pseudomonadota;c__Alphaproteobacteria;o__Pelagibacterales;f__Pelagibacteraceae;g__Pelagibacter;s__Pelagibacter ubique_N	GCA_001179885.1	Tropical	SAG	Marine	Red Sea	53.22	0.47	0	28.423	667038	82	739	244	274.46	96.8	3.2	3	31.2091	1	1	1	1	1	12
AG-918-P15		SAR11-I		d__Bacteria;p__Pseudomonadota;c__Alphaproteobacteria;o__Pelagibacterales;f__Pelagibacteraceae;g__Pelagibacter;s__Pelagibacter ubique_E	GCA_902614165.1	Subtropical	MAG	Marine	North Atlantic Ocean	80.76	0.48	0	28.842	962605	46	1021	264	293.45	96.72	3.28	5	31.4259	1	1	1	1	0	29
SFB_34D_13Oct24_05_ms_bin_2		SAR11-I		d__Bacteria;p__Pseudomonadota;c__Alphaproteobacteria;o__Pelagibacterales;f__Pelagibacteraceae;g__Pelagibacter;s__Pelagibacter sp008638165	GCA_025994975.1	Temperate	MAG	Brackish	San Francisco Bay, USA	72.22	0.2	0	29.463	721976	77	769	248	285.39	97.58	2.42	3	24.0565	1	0	0	0	0	22
SFB_27D_13Oct24_20_ms_bin_12		SAR11-I		d__Bacteria;p__Pseudomonadota;c__Alphaproteobacteria;o__Pelagibacterales;f__Pelagibacteraceae;g__Pelagibacter;s__Pelagibacter sp008638165	GCA_025994985.1	Temperate	MAG	Brackish	San Francisco Bay, USA	60	4.29	30.77	29.301	582142	55	603	249	287.95	97.07	2.93	3	30.266	1	0	0	0	0	15
SCGC_AAA795-O20		SAR11-I		d__Bacteria;p__Pseudomonadota;c__Alphaproteobacteria;o__Pelagibacterales;f__Pelagibacteraceae;g__Pelagibacter;s__Pelagibacter ubique_F	GCF_001180185.1	Tropical	SAG	Marine	Red Sea	78.7	0	0	29.022	1009143	62	1074	258	291.23	97.04	2.96	4	28.6251	1	1	1	1	1	18
RS39		SAR11-I		d__Bacteria;p__Pseudomonadota;c__Alphaproteobacteria;o__Pelagibacterales;f__Pelagibacteraceae;g__Pelagibacter;s__Pelagibacter sp002101315	GCF_002101315.1	Tropical	Isolate	Marine	Red Sea	100	0	0	29.208	1200090	1	1266	273.5	304.88	96.95	3.05	4	28.1983	1	1	1	1	1	31
SCGC_AAA795-L23		SAR11-I		d__Bacteria;p__Pseudomonadota;c__Alphaproteobacteria;o__Pelagibacterales;f__Pelagibacteraceae;g__Pelagibacter;s__Pelagibacter ubique_G	GCA_001180065.1	Tropical	SAG	Marine	Red Sea	70.66	0	0	27.831	834822	150	908	245	273.01	97.89	2.11	2.5	22.1106	0	0	0	1	0	14
AG-426-G02		SAR11-I		d__Bacteria;p__Pseudomonadota;c__Alphaproteobacteria;o__Pelagibacterales;f__Pelagibacteraceae;g__Pelagibacter;s__Pelagibacter sp003213155	GCA_003213155.1	Subtropical	SAG	Marine	North Atlantic Ocean	86.75	0	0	29.626	1039357	33	1102	258.5	296.43	96.47	3.53	4	33.4772	4	1	1	1	1	27
TMED239		SAR11-I		d__Bacteria;p__Pseudomonadota;c__Alphaproteobacteria;o__Pelagibacterales;f__Pelagibacteraceae;g__Pelagibacter;s__Pelagibacter sp002169475	GCA_002169475.2	Subtropical	MAG	Marine	Mediterranean Sea	52.46	0	0	28.98	757015	46	793	260	299.17	97.13	2.87	3	28.754	1	0	0	0	0	11
HTCC7214		SAR11-I		d__Bacteria;p__Pseudomonadota;c__Alphaproteobacteria;o__Pelagibacterales;f__Pelagibacteraceae;g__Pelagibacter;s__	GCF_000701385.1	Subtropical	Isolate	Marine	Sargasso Sea	99.05	0.47	0	29.24	1375060	1	1430	279.5	308.04	96.56	3.44	4	32.3669	3	1	1	1	1	30
HTCC7211		SAR11-I		d__Bacteria;p__Pseudomonadota;c__Alphaproteobacteria;o__Pelagibacterales;f__Pelagibacteraceae;g__Pelagibacter;s__Pelagibacter sp000155895	GCF_000155895.1	Subtropical	Isolate	Marine	Sargasso Sea	100	0.47	0	29.035	1456888	1	1542	272	302.6	96.47	3.53	4	32.6535	3	1	1	1	1	30
SFB_34D_13Oct24_05_ms_bin_3		SAR11-I		d__Bacteria;p__Pseudomonadota;c__Alphaproteobacteria;o__Pelagibacterales;f__Pelagibacteraceae;g__Pelagibacter;s__Pelagibacter sp017880265	GCA_025995025.1	Temperate	MAG	Brackish	San Francisco Bay, USA	62.19	1.9	25	29.394	919444	151	989	248	273.46	97.16	2.84	4	29.9553	1	1	1	0	0	15
HTCC9022		SAR11-I		d__Bacteria;p__Pseudomonadota;c__Alphaproteobacteria;o__Pelagibacterales;f__Pelagibacteraceae;g__Pelagibacter;s__	GCF_000472565.1	Subtropical	Isolate	Marine	Sargasso Sea	100	0	0	29.542	1359709	10	1405	268	306.92	96.05	3.95	4	37.4651	3	1	1	1	1	30
HTCC8051		SAR11-I		d__Bacteria;p__Pseudomonadota;c__Alphaproteobacteria;o__Pelagibacterales;f__Pelagibacteraceae;g__Pelagibacter;s__	GCF_000472605.1	Subtropical	Isolate	Marine	Oregon Coast	99.76	0	0	29.202	1395018	1	1460	280	306.14	96.54	3.46	4	32.3561	3	1	1	1	1	31
AG-430-E20		SAR11-I		d__Bacteria;p__Pseudomonadota;c__Alphaproteobacteria;o__Pelagibacterales;f__Pelagibacteraceae;g__Pelagibacter;s__Pelagibacter sp003209915	GCA_003209915.1	Temperate	SAG	Marine	North Atlantic Ocean	90.6	0	0	29.811	1183991	16	1258	266	298.91	96.57	3.43	4	31.9176	1	1	1	1	1	30
SCGC_AAA795-A20		SAR11-I		d__Bacteria;p__Pseudomonadota;c__Alphaproteobacteria;o__Pelagibacterales;f__Pelagibacteraceae;g__Pelagibacter;s__Pelagibacter ubique_Q	GCF_001179845.1	Tropical	SAG	Marine	Red Sea	86.82	0	0	29.119	1140609	63	1202	269	297.37	96.87	3.13	3	30.3571	1	1	1	1	1	26
HIMB083		SAR11-I		d__Bacteria;p__Pseudomonadota;c__Alphaproteobacteria;o__Pelagibacterales;f__Pelagibacteraceae;g__Pelagibacter;s__Pelagibacter ubique_Q	GCF_000504225.1	Temperate	SAG	Marine	Pacific Ocean	99.53	0	0	29.147	1395997	1	1464	278	305.72	96.68	3.32	4	30.9893	4	1	1	1	1	31
SCGC_AAA797-I19		SAR11-I		d__Bacteria;p__Pseudomonadota;c__Alphaproteobacteria;o__Pelagibacterales;f__Pelagibacteraceae;g__Pelagibacter;s__Pelagibacter ubique_D	GCF_001180225.1	Tropical	SAG	Marine	Red Sea	67.04	0.47	100	29.206	1016895	77	1069	264	296.16	97.03	2.97	3	29.2922	5	0	1	1	1	20
SCGC_AAA795-O19		SAR11-I		d__Bacteria;p__Pseudomonadota;c__Alphaproteobacteria;o__Pelagibacterales;f__Pelagibacteraceae;g__Pelagibacter;s__Pelagibacter ubique_P	GCF_001180165.1	Tropical	SAG	Marine	Red Sea	51.44	0	0	29.089	804609	62	859	266	293.38	97.55	2.45	3	24.1469	1	0	0	1	0	9
SCGC_AAA795-P11		SAR11-I		d__Bacteria;p__Pseudomonadota;c__Alphaproteobacteria;o__Pelagibacterales;f__Pelagibacteraceae;g__Pelagibacter;s__Pelagibacter ubique_O	GCF_001180205.1	Tropical	SAG	Marine	Red Sea	73.09	1.2	8.33	29.238	977727	127	1027	252	286.37	97.06	2.94	3	30.2982	0	0	1	1	1	20
SCGC_AAA795-J21		SAR11-I		d__Bacteria;p__Pseudomonadota;c__Alphaproteobacteria;o__Pelagibacterales;f__Pelagibacteraceae;g__Pelagibacter;s__Pelagibacter ubique_A	GCF_001180025.1	Tropical	SAG	Marine	Red Sea	60.51	0	0	29.076	872902	77	949	254	283.56	96.71	3.29	3	31.5791	1	0	1	0	1	26
N-LaCa2-17jan24-061		SAR11-I		d__Bacteria;p__Pseudomonadota;c__Alphaproteobacteria;o__Pelagibacterales;f__Pelagibacteraceae;g__Pelagibacter;s__	GCA_965236125	Subtropical	MAG	Brackish	Laguna de Castillos - Station 2, Uruguay	82.57	4.03	70	29.264	665983	15	748	244	281	95.3	4.7	4	41.2757	0	1	0	0	0	23
cas-50m-174		SAR11-I		d__Bacteria;p__Pseudomonadota;c__Alphaproteobacteria;o__Pelagibacterales;f__Pelagibacteraceae;g__Pelagibacter;s__Pelagibacter sp001438335	_	Continental	MAG	Brackish	Caspian Sea	61.86	1.66	0	29.962	816724	77	851	261	295.18	97.28	2.72	4	28.1582	1	1	1	0	0	15
BACL5_MAG-120820-bin39		SAR11-I		d__Bacteria;p__Pseudomonadota;c__Alphaproteobacteria;o__Pelagibacterales;f__Pelagibacteraceae;g__Pelagibacter;s__Pelagibacter sp001438335	GCA_001438335.1	Temperate	MAG	Brackish	Baltic Sea	95.32	4.27	66.67	29.341	1151850	228	1208	236.5	268.85	97.02	2.98	4	33.8739	2	1	0	0	0	24
cas-150m-16		SAR11-I		d__Bacteria;p__Pseudomonadota;c__Alphaproteobacteria;o__Pelagibacterales;f__Pelagibacteraceae;g__Pelagibacter;s__	_	Continental	MAG	Brackish	Caspian Sea	60.17	0.95	0	28.593	785931	92	814	259	286.82	96.43	3.57	5	38.2565	1	0	0	0	0	9
Baikal-deep-G37		SAR11-I		d__Bacteria;p__Pseudomonadota;c__Alphaproteobacteria;o__Pelagibacterales;f__Pelagibacteraceae;g__Pelagibacter;s__Pelagibacter sp009693705	GCA_009693705.1	Continental	MAG	Freshwater	South Central Siberia	97.16	0.95	0	28.675	1292575	49	1352	259	296.08	95.73	4.27	6	41.4198	1	1	1	1	1	28
Baikal-G1		SAR11-I		d__Bacteria;p__Pseudomonadota;c__Alphaproteobacteria;o__Pelagibacterales;f__Pelagibacteraceae;g__Pelagibacter;s__Pelagibacter sp009693705	GCA_002737675.1	Continental	MAG	Freshwater	South Central Siberia	90.97	8.77	7.89	28.68	1144012	33	1193	260	300.05	95.94	4.06	6	39.0892	1	1	1	0	1	25
N-Mw9-20nov23-020		SAR11-I	Pelagibacter malawensis	d__Bacteria;p__Pseudomonadota;c__Alphaproteobacteria;o__Pelagibacterales;f__Pelagibacteraceae;g__Pelagibacter;s__Pelagibacter sp016870175	GCA_965235865	Tropical	MAG	Freshwater	Lake Malawi, Malawi	97.2	0.47	0	29.543	1086729	3	1407	193	231.86	91.16	8.84	10	66.6974	2	1	1	1	1	29
N-Mw8-13nov23-009		SAR11-I	Pelagibacter malawensis	d__Bacteria;p__Pseudomonadota;c__Alphaproteobacteria;o__Pelagibacterales;f__Pelagibacteraceae;g__Pelagibacter;s__Pelagibacter sp016870175	GCA_965236055	Tropical	MAG	Freshwater	Lake Malawi, Malawi	93.03	0	0	29.556	1103076	5	1295	223	262.36	93.48	6.52	6	54.0941	1	1	1	1	2	29
N-Mw5-13nov23-008		SAR11-I	Pelagibacter malawensis	d__Bacteria;p__Pseudomonadota;c__Alphaproteobacteria;o__Pelagibacterales;f__Pelagibacteraceae;g__Pelagibacter;s__Pelagibacter sp016870175	GCA_965235995	Tropical	MAG	Freshwater	Lake Malawi, Malawi	99.05	0.47	0	29.424	1063621	2	1204	242	274.07	94.13	5.87	6	50.6461	1	1	1	0	1	28
N-Mw14-23nov23-016		SAR11-I	Pelagibacter malawensis	d__Bacteria;p__Pseudomonadota;c__Alphaproteobacteria;o__Pelagibacterales;f__Pelagibacteraceae;g__Pelagibacter;s__Pelagibacter sp016870175	GCA_965235665	Tropical	MAG	Freshwater	Lake Malawi, Malawi	97.16	0.49	0	29.709	806378	7	923	233	268.06	94.6	5.4	6	45.6384	1	1	1	0	2	28
N-Mw10-20nov23-014		SAR11-I	Pelagibacter malawensis	d__Bacteria;p__Pseudomonadota;c__Alphaproteobacteria;o__Pelagibacterales;f__Pelagibacteraceae;g__Pelagibacter;s__Pelagibacter sp016870175	GCA_965236025	Tropical	MAG	Freshwater	Lake Malawi, Malawi	99.05	0.47	0	29.343	991937	5	1102	245	283.61	95.26	4.74	5	41.6779	1	1	1	1	1	29
N-Mw13-23nov23-053		SAR11-I	Pelagibacter malawensis	d__Bacteria;p__Pseudomonadota;c__Alphaproteobacteria;o__Pelagibacterales;f__Pelagibacteraceae;g__Pelagibacter;s__Pelagibacter sp016870175	GCA_965235955	Tropical	MAG	Freshwater	Lake Malawi, Malawi	99.53	0.47	0	29.431	1044813	8	1198	238.5	274.46	95.14	4.86	6	41.6134	1	1	1	1	1	28
N-Mw1-16nov23-027		SAR11-I	Pelagibacter malawensis	d__Bacteria;p__Pseudomonadota;c__Alphaproteobacteria;o__Pelagibacterales;f__Pelagibacteraceae;g__Pelagibacter;s__Pelagibacter sp016870175	GCA_965244645	Tropical	MAG	Freshwater	Lake Malawi, Malawi	99.05	0.71	0	29.441	868523	1	1072	205.5	249.5	93.22	6.78	7	53.5255	1	1	1	1	1	29
N-Mw6-13nov23-020		SAR11-I	Pelagibacter malawensis	d__Bacteria;p__Pseudomonadota;c__Alphaproteobacteria;o__Pelagibacterales;f__Pelagibacteraceae;g__Pelagibacter;s__Pelagibacter sp016870175	GCA_965236085	Tropical	MAG	Freshwater	Lake Malawi, Malawi	99.05	0.95	0	29.628	911255	6	1068	225.5	263.4	94.2	5.8	6	48.8172	2	1	1	2	1	33
N-Mw2-16nov23-014		SAR11-I	Pelagibacter malawensis	d__Bacteria;p__Pseudomonadota;c__Alphaproteobacteria;o__Pelagibacterales;f__Pelagibacteraceae;g__Pelagibacter;s__Pelagibacter sp016870175	GCA_965235925	Tropical	MAG	Freshwater	Lake Malawi, Malawi	99.05	0.95	50	29.083	528286	2	603	245	275.48	94.76	5.24	5	45.1338	0	1	1	1	1	29
N-Mw7-13nov23-016		SAR11-I	Pelagibacter malawensis	d__Bacteria;p__Pseudomonadota;c__Alphaproteobacteria;o__Pelagibacterales;f__Pelagibacteraceae;g__Pelagibacter;s__Pelagibacter sp016870175	GCA_965235705	Tropical	MAG	Freshwater	Lake Malawi, Malawi	99.53	0.95	0	29.455	1027849	6	1205	225	263.35	93.44	6.56	6	54.943	1	1	1	1	1	29
N-Mw15-23nov23-031		SAR11-I	Pelagibacter malawensis	d__Bacteria;p__Pseudomonadota;c__Alphaproteobacteria;o__Pelagibacterales;f__Pelagibacteraceae;g__Pelagibacter;s__Pelagibacter sp016870175	GCA_965235985	Tropical	MAG	Freshwater	Lake Malawi, Malawi	98.58	1.42	0	29.521	935694	10	1116	218	256.2	92.51	7.49	6	61.7698	1	1	1	1	1	31
N-Mw11-20nov23-023		SAR11-I	Pelagibacter malawensis	d__Bacteria;p__Pseudomonadota;c__Alphaproteobacteria;o__Pelagibacterales;f__Pelagibacteraceae;g__Pelagibacter;s__Pelagibacter sp016870175	GCA_965235605	Tropical	MAG	Freshwater	Lake Malawi, Malawi	97.63	0.95	0	29.387	854957	6	974	240	275.54	94.81	5.19	5	44.5799	1	1	1	0	2	28
N-SAMO-19jan24-002	not in tree			d__Bacteria;p__Pseudomonadota;c__Alphaproteobacteria;o__Pelagibacterales;f__Pelagibacteraceae;g__Pelagibacter;s__	GCA_965235675	Subtropical	MAG	Marine	South American Marine Observatory, Uruguay	59.51	0	0	30.27	720906	3	863	218	255.32	92.64	7.36	6	59.9254	0	0	1	1	1	25
MED-G40		SAR11-II		d__Bacteria;p__Pseudomonadota;c__Alphaproteobacteria;o__Pelagibacterales;f__Pelagibacteraceae;g__MED-G40;s__MED-G40 sp002457515	GCA_002457515.1	Subtropical	MAG	Marine	Mediterranean Sea	89.79	0	0	29.615	911758	8	966	266.5	302.77	96.97	3.03	3	28.303	1	1	0	0	0	18
N-LaRo1-16jan24-084		SAR11-II		d__Bacteria;p__Pseudomonadota;c__Alphaproteobacteria;o__Pelagibacterales;f__Pelagibacteraceae;g__SYDM01;s__SYDM01 sp008638125	GCA_965235935	Subtropical	MAG	Brackish	Laguna de Rocha - Station 1, Uruguay	71.19	0	0	30.088	1039213	5	1198	224	262.43	92.3	7.7	7	65.2046	1	0	0	0	0	16
N-Balt4-05jul22-028		SAR11-II		d__Bacteria;p__Pseudomonadota;c__Alphaproteobacteria;o__Pelagibacterales;f__Pelagibacteraceae;g__SYDM01;s__SYDM01 sp008638125	GCA_965235895	Temperate	MAG	Brackish	Coastal Baltic Sea	75.9	1.2	100	29.277	727376	5	818	243	275.83	94.94	5.06	5	43.7774	0	1	1	1	1	24
TrH-25oct19-165		SAR11-II		d__Bacteria;p__Pseudomonadota;c__Alphaproteobacteria;o__Pelagibacterales;f__Pelagibacteraceae;g__SYDM01;s__SYDM01 sp005801485	GCA_965235125	Temperate	MAG	Freshwater	Traunsee, Austria	93.98	4.82	20	29.217	1035426	87	1083	258	290.74	96.84	3.16	4	32.2402	1	1	0	0	0	19
AH-24oct19-262		SAR11-II		d__Bacteria;p__Pseudomonadota;c__Alphaproteobacteria;o__Pelagibacterales;f__Pelagibacteraceae;g__SYDM01;s__SYDM01 sp005801485	GCA_945861455.1	Temperate	MAG	Freshwater	Attersee, Austria	90.29	0.6	100	29.228	953634	91	982	260	293.38	96.99	3.01	4	31.4033	1	1	0	0	0	24
cas-50m-154		SAR11-II		d__Bacteria;p__Pseudomonadota;c__Alphaproteobacteria;o__Pelagibacterales;f__Pelagibacteraceae;g__SYDM01;s__SYDM01 sp005801485	_	Continental	MAG	Brackish	Caspian Sea	89.16	1.28	0	29.187	1053161	86	1107	260	293.9	96.88	3.12	4	31.4976	2	1	1	0	0	21
TrE-03may19-55		SAR11-II		d__Bacteria;p__Pseudomonadota;c__Alphaproteobacteria;o__Pelagibacterales;f__Pelagibacteraceae;g__SYDM01;s__SYDM01 sp005801485	GCA_965235515	Temperate	MAG	Freshwater	Traunsee, Austria	67.74	3.01	25	29.32	664110	120	685	246	273.29	97.07	2.93	4	33.7257	1	0	1	0	0	11
PRT-SC02		SAR11-II		d__Bacteria;p__Pseudomonadota;c__Alphaproteobacteria;o__Pelagibacterales;f__Pelagibacteraceae;g__PRT-SC02;s__PRT-SC02 sp001321855	GCA_001321855.1	Temperate	SAG	Marine	Atlantic Ocean	66.76	0.14	50	29.433	655147	100	704	247.5	274.89	96.07	3.93	3	39.8729	0	0	1	0	1	17
TMED165		SAR11-II		d__Bacteria;p__Pseudomonadota;c__Alphaproteobacteria;o__Pelagibacterales;f__Pelagibacteraceae;g__TMED165;s__TMED165 sp002171035	GCA_002171035.2	Subtropical	MAG	Marine	Mediterranean Sea	63.05	0	0	28.734	563067	33	602	255.5	294.94	97.87	2.13	2	20.506	0	0	0	1	0	15
MED727		SAR11-II		d__Bacteria;p__Pseudomonadota;c__Alphaproteobacteria;o__Pelagibacterales;f__Pelagibacteraceae;g__MED727;s__MED727 sp002689245	GCA_002689245.1	Subtropical	MAG	Marine	Mediterranean Sea	61.45	1.2	0	29.299	503620	23	533	254	293.19	96.66	3.34	3	32.1262	0	0	0	0	0	13
TMED170		SAR11-II		d__Bacteria;p__Pseudomonadota;c__Alphaproteobacteria;o__Pelagibacterales;f__Pelagibacteraceae;g__TMED170;s__TMED170 sp002170875	GCA_002170875.2	Subtropical	MAG	Marine	Mediterranean Sea	51.52	0	0	28.107	453645	17	486	251	292	96.32	3.68	5	34.5611	1	0	0	1	0	14
SCGC_AAA795-E07		SAR11-II		d__Bacteria;p__Pseudomonadota;c__Alphaproteobacteria;o__Pelagibacterales;f__Pelagibacteraceae;g__Pelagibacter_A;s__Pelagibacter_A ubique_A	GCF_001179945.1	Tropical	SAG	Marine	Red Sea	63.27	0.22	0	29.696	681366	101	740	258	278.12	97.69	2.31	2	23.439	1	1	0	0	0	15
AG-313-A04		SAR11-II		d__Bacteria;p__Pseudomonadota;c__Alphaproteobacteria;o__Pelagibacterales;f__Pelagibacteraceae;g__Pelagibacter_A;s__Pelagibacter_A sp003284275	GCA_003284275.1	Subtropical	SAG	Marine	South Pacific Ocean	91.89	0	0	29.908	959028	19	1005	268	301.68	96.88	3.12	3	29.5449	1	1	1	0	1	26
AE-03may19-36	not in tree	SAR11-II		d__Bacteria;p__Pseudomonadota;c__Alphaproteobacteria;o__Pelagibacterales;f__Pelagibacteraceae;g__SYDM01;s__SYDM01 sp005801485	GCA_965235455	Temperate	MAG	Freshwater	Attersee, Austria	45.16	0	0	29.551	503641	96	534	226	260.51	96.26	3.74	4	42.2309	2	1	0	0	0	8
LSUCC0664		SAR11-IIIa		d__Bacteria;p__Pseudomonadota;c__Alphaproteobacteria;o__Pelagibacterales;f__Pelagibacteraceae;g__HIMB114;s__HIMB114 sp008638005	2770939455	Subtropical	Isolate	Brackish	Gulf of Mexico	97.62	0	0	30.191	1170396	1	1255	259	299.16	96.68	3.32	3	30.1944	1	1	1	1	1	31
MED-G102		SAR11-IIIa		d__Bacteria;p__Pseudomonadota;c__Alphaproteobacteria;o__Pelagibacterales;f__Pelagibacteraceae;g__HIMB114;s__HIMB114 sp002684895	GCA_004321785.1	Subtropical	MAG	Marine	Mediterranean Sea	84.72	0	0	29.849	845969	41	912	255	290.52	97.43	2.57	3	24.5977	1	1	1	0	0	14
MED-G103		SAR11-IIIa		d__Bacteria;p__Pseudomonadota;c__Alphaproteobacteria;o__Pelagibacterales;f__Pelagibacteraceae;g__HIMB114;s__HIMB114 sp002171085	GCA_004213805.1	Subtropical	MAG	Marine	Mediterranean Sea	77.5	0	0	29.396	822852	44	856	261	297.6	97.15	2.85	3	28.2988	0	0	1	1	0	17
LSUCC0723		SAR11-IIIa		d__Bacteria;p__Pseudomonadota;c__Alphaproteobacteria;o__Pelagibacterales;f__Pelagibacteraceae;g__HIMB114;s__	2739368061	Subtropical	Isolate	Brackish	Gulf of Mexico	97.62	0	0	29.448	1204848	1	1308	260	295.06	96.54	3.46	3	31.1434	1	1	1	1	1	31
HIMB114		SAR11-IIIa		d__Bacteria;p__Pseudomonadota;c__Alphaproteobacteria;o__Pelagibacterales;f__Pelagibacteraceae;g__HIMB114;s__HIMB114 sp000163555	GCA_000163555.2	Temperate	Isolate	Marine	Pacific Ocean	98.81	0	0	29.586	1237371	1	1324	263	300.57	96.92	3.08	3	28.1712	3	2	1	1	1	31
LSUCC0261		SAR11-IIIa		d__Bacteria;p__Pseudomonadota;c__Alphaproteobacteria;o__Pelagibacterales;f__Pelagibacteraceae;g__IMCC9063;s__IMCC9063 sp008638015	2728369215	Subtropical	Isolate	Brackish	Gulf of Mexico	98.81	0	0	30.455	1270890	1	1328	274	304.37	95.84	4.16	4	38.8529	1	1	1	1	1	32
N-LaCa2-17jan24-056		SAR11-IIIa		d__Bacteria;p__Pseudomonadota;c__Alphaproteobacteria;o__Pelagibacterales;f__Pelagibacteraceae;g__IMCC9063;s__IMCC9063 sp008638015	GCA_965235715	Subtropical	MAG	Brackish	Laguna de Castillos - Station 2, Uruguay	62.86	0	0	30.518	948441	3	1028	250.5	291.29	95.35	4.65	4	41.9762	0	1	0	0	0	13
N-LaRo1-16jan24-055		SAR11-IIIa		d__Bacteria;p__Pseudomonadota;c__Alphaproteobacteria;o__Pelagibacterales;f__Pelagibacteraceae;g__IMCC9063;s__IMCC9063 sp008638015	GCA_965235645	Subtropical	MAG	Brackish	Laguna de Rocha - Station 1, Uruguay	74.01	0	0	29.866	935891	6	1551	126	166.07	85.13	14.87	25	89.4132	1	0	0	0	0	12
N-CoE-06may23-C26		SAR11-IIIa		d__Bacteria;p__Pseudomonadota;c__Alphaproteobacteria;o__Pelagibacterales;f__Pelagibacteraceae;g__IMCC9063;s__IMCC9063 sp008638015	GCA_965244055	Subtropical	MAG	Marine	Lake Cootharaba, Australia	51.85	0	0	29.285	857624	1	1052	211	246.48	92.21	7.79	7	62.1367	2	1	0	0	0	10
N-LaRo2-16jan24-C98	not in tree	SAR11-IIIa		d__Bacteria;p__Pseudomonadota;c__Alphaproteobacteria;o__Pelagibacterales;f__Pelagibacteraceae;g__IMCC9063;s__IMCC9063 sp008638015	GCA_965243925	Subtropical	MAG	Brackish	Laguna de Rocha - Station 2, Uruguay	53.7	0	0	30.606	955553	1	1122	227.5	266.21	94.72	5.28	5	44.0594	1	1	0	0	0	9
N-LaCa1-17jan24-C29		SAR11-IIIa		d__Bacteria;p__Pseudomonadota;c__Alphaproteobacteria;o__Pelagibacterales;f__Pelagibacteraceae;g__IMCC9063;s__	GCA_965244045	Subtropical	MAG	Brackish	Laguna de Castillos - Station 1, Uruguay	53.7	0	0	31.037	1093721	1	1190	252	288.23	94.93	5.07	5	45.491	1	1	1	1	1	13
N-LaCa2-17jan24-C21		SAR11-IIIa		d__Bacteria;p__Pseudomonadota;c__Alphaproteobacteria;o__Pelagibacterales;f__Pelagibacteraceae;g__IMCC9063;s__	GCA_965244305	Subtropical	MAG	Brackish	Laguna de Castillos - Station 2, Uruguay	70.24	2.38	100	29.301	1214664	1	1452	226	259.68	94.33	5.67	6	47.1404	2	1	1	1	1	24
N-LaRo3-16jan24-067		SAR11-IIIa		d__Bacteria;p__Pseudomonadota;c__Alphaproteobacteria;o__Pelagibacterales;f__Pelagibacteraceae;g__IMCC9063;s__	GCA_965235735	Subtropical	MAG	Brackish	Laguna de Rocha - Station 3, Uruguay	67.86	2.38	100	30.903	1021056	8	1141	248	283.4	95.66	4.34	5	37.8711	1	1	0	0	0	10
N-LaRo1-16jan24-069		SAR11-IIIa		d__Bacteria;p__Pseudomonadota;c__Alphaproteobacteria;o__Pelagibacterales;f__Pelagibacteraceae;g__IMCC9063;s__	GCA_965235745	Subtropical	MAG	Brackish	Laguna de Rocha - Station 1, Uruguay	80.75	0	0	30.763	759792	5	856	242.5	281.98	96.14	3.86	4	34.0104	0	0	1	1	1	31
IMCC9063		SAR11-IIIa		d__Bacteria;p__Pseudomonadota;c__Alphaproteobacteria;o__Pelagibacterales;f__Pelagibacteraceae;g__IMCC9063;s__IMCC9063 sp000195085	GCF_000195085.1	Arctic	Isolate	Marine	Arctic Ocean	98.81	0	0	31.671	1284727	1	1421	249	285.6	95.23	4.77	7	42.2135	3	1	1	1	1	30
3300027983-82		SAR11-IIIa		d__Bacteria;p__Pseudomonadota;c__Alphaproteobacteria;o__Pelagibacterales;f__Pelagibacteraceae;g__IMCC9063;s__	_	Arctic	MAG	Freshwater	Lake Fryxell, Antarctica	73.56	3.57	33.33	32.928	881624	129	933	237	267.98	95.48	4.52	6	48.6736	0	2	0	0	0	13
3300027976-91		SAR11-IIIa		d__Bacteria;p__Pseudomonadota;c__Alphaproteobacteria;o__Pelagibacterales;f__Pelagibacteraceae;g__IMCC9063;s__	_	Arctic	MAG	Freshwater	Lake Fryxell, Antarctica	92.75	3.57	80	33.344	1129978	29	1200	257	292.97	95.53	4.47	6	42.1394	1	1	0	0	0	26
N-Balt2-05jul22-002		SAR11-IIIa		d__Bacteria;p__Pseudomonadota;c__Alphaproteobacteria;o__Pelagibacterales;f__Pelagibacteraceae;g__IMCC9063;s__IMCC9063 sp008638225	GCA_965235285	Temperate	MAG	Brackish	Vistula Lagoon, brackish part, Poland	98.81	0	0	31.256	1056647	2	1174	244.5	282.42	95.05	4.95	5	43.3253	1	1	1	1	1	32
N-Balt1-05jul22-035		SAR11-IIIa		d__Bacteria;p__Pseudomonadota;c__Alphaproteobacteria;o__Pelagibacterales;f__Pelagibacteraceae;g__IMCC9063;s__IMCC9063 sp008638225	GCA_965235305	Temperate	MAG	Freshwater	Vistula Lagoon, freshwater part, Poland	97.51	0	0	31.211	1077942	2	1196	241.5	277.68	93.5	6.5	6	57.101	1	1	1	0	1	31
N-LaRo3-16jan24-063		SAR11-IIIa		d__Bacteria;p__Pseudomonadota;c__Alphaproteobacteria;o__Pelagibacterales;f__Pelagibacteraceae;g__IMCC9063;s__IMCC9063 sp008638225	GCA_965235785	Subtropical	MAG	Brackish	Laguna de Rocha - Station 3, Uruguay	98.81	0	0	31.09	570616	2	612	258	292.73	94.55	5.45	7	50.1806	0	0	0	1	0	31
N-LaCa1-17jan24-038		SAR11-IIIa		d__Bacteria;p__Pseudomonadota;c__Alphaproteobacteria;o__Pelagibacterales;f__Pelagibacteraceae;g__IMCC9063;s__IMCC9063 sp008638225	GCA_965236065	Subtropical	MAG	Brackish	Laguna de Castillos - Station 2, Uruguay	98.81	1.19	100	28.758	1012021	5	1135	246	280.23	95.26	4.74	6	41.3181	1	1	0	0	0	34
N-LaCa2-17jan24-036		SAR11-IIIa		d__Bacteria;p__Pseudomonadota;c__Alphaproteobacteria;o__Pelagibacterales;f__Pelagibacteraceae;g__IMCC9063;s__IMCC9063 sp008638225	GCA_965236165	Subtropical	MAG	Brackish	Laguna de Castillos - Station 2, Uruguay	95.24	3.57	50	30.244	665765	4	782	217	255.28	91.11	8.89	11	74.2585	0	0	0	0	0	27
cas-150m-34		SAR11-IIIa		d__Bacteria;p__Pseudomonadota;c__Alphaproteobacteria;o__Pelagibacterales;f__Pelagibacteraceae;g__IMCC9063;s__IMCC9063 sp008638225	_	Continental	MAG	Brackish	Caspian Sea	80.95	0.74	100	30.938	781659	68	828	248	283.72	96.37	3.63	4	36.3252	1	1	0	0	0	19
N-LaRo2-16jan24-084		SAR11-IIIa		d__Bacteria;p__Pseudomonadota;c__Alphaproteobacteria;o__Pelagibacterales;f__Pelagibacteraceae;g__IMCC9063;s__IMCC9063 sp008638225	GCA_965235765	Subtropical	MAG	Brackish	Laguna de Rocha - Station 2, Uruguay	92.86	0	0	30.683	678254	5	819	217	253.87	93.27	6.73	7	54.4761	2	0	1	0	1	26
N-LaRo1-16jan24-C95		SAR11-IIIa		d__Bacteria;p__Pseudomonadota;c__Alphaproteobacteria;o__Pelagibacterales;f__Pelagibacteraceae;g__IMCC9063;s__IMCC9063 sp008638225	GCA_965244655	Subtropical	MAG	Brackish	Laguna de Rocha - Station 1, Uruguay	57.41	0	0	29.317	762755	1	883	240	270.63	94.67	5.33	5	45.4458	1	1	1	1	2	16
N-Balt4-05jul22-001	not in tree	SAR11-IIIa		d__Bacteria;p__Pseudomonadota;c__Alphaproteobacteria;o__Pelagibacterales;f__Pelagibacteraceae;g__IMCC9063;s__	GCA_965235655	Temperate	MAG	Brackish	Coastal Baltic Sea	89.29	0	0	29.81	1117172	9	1279	236	272.26	94.79	5.21	5	44.8112	1	1	1	0	1	24
N-Mw11-20nov23-095		SAR11-IIIb.1	Allofontibacter africanus	d__Bacteria;p__Pseudomonadota;c__Alphaproteobacteria;o__Pelagibacterales;f__Pelagibacteraceae;g__Fonsibacter;s__Fonsibacter sp016882225	GCA_965236035	Tropical	MAG	Freshwater	Lake Malawi, Malawi	87.95	0	0	29.214	677851	4	835	216	250.85	93.96	6.04	6	48.4953	0	1	0	1	0	30
N-Mw14-23nov23-072		SAR11-IIIb.1	Allofontibacter africanus	d__Bacteria;p__Pseudomonadota;c__Alphaproteobacteria;o__Pelagibacterales;f__Pelagibacteraceae;g__Fonsibacter;s__Fonsibacter sp016882225	GCA_965236095	Tropical	MAG	Freshwater	Lake Malawi, Malawi	81.93	0	0	30.12	1111757	8	1303	217	257.77	92.32	7.68	9	65.0327	1	1	0	0	0	25
N-Mw6-13nov23-081		SAR11-IIIb.1	Allofontibacter africanus	d__Bacteria;p__Pseudomonadota;c__Alphaproteobacteria;o__Pelagibacterales;f__Pelagibacteraceae;g__Fonsibacter;s__Fonsibacter sp016882225	GCA_965235885	Tropical	MAG	Freshwater	Lake Malawi, Malawi	95.18	0	0	29.967	1092617	7	1262	225	263.45	93	7	7	59.7156	3	1	0	1	0	28
N-Mw8-13nov23-087		SAR11-IIIb.1	Allofontibacter africanus	d__Bacteria;p__Pseudomonadota;c__Alphaproteobacteria;o__Pelagibacterales;f__Pelagibacteraceae;g__Fonsibacter;s__Fonsibacter sp016882225	GCA_965235805	Tropical	MAG	Freshwater	Lake Malawi, Malawi	91.57	1.2	0	29.746	1119899	4	1616	168	202.15	89.12	10.88	24	74.2787	2	1	1	1	1	34
N-Mw10-20nov23-021		SAR11-IIIb.1	Allofontibacter africanus	d__Bacteria;p__Pseudomonadota;c__Alphaproteobacteria;o__Pelagibacterales;f__Pelagibacteraceae;g__Fonsibacter;s__Fonsibacter sp016882225	GCA_965235615	Tropical	MAG	Freshwater	Lake Malawi, Malawi	73.49	1.2	100	28.553	1172595	15	1279	251	285.45	94.46	5.54	6	49.6409	1	1	0	1	0	32
N-Mw7-13nov23-070		SAR11-IIIb.1	Allofontibacter africanus	d__Bacteria;p__Pseudomonadota;c__Alphaproteobacteria;o__Pelagibacterales;f__Pelagibacteraceae;g__Fonsibacter;s__Fonsibacter sp016882225	GCA_965235855	Tropical	MAG	Freshwater	Lake Malawi, Malawi	93.98	1.2	0	28.643	1135049	3	1213	260	294.31	95.46	4.54	6	41.4936	1	1	1	1	1	33
M_DeepCast_200m_m2_041		SAR11-IIIb.1	Allofontibacter africanus	d__Bacteria;p__Pseudomonadota;c__Alphaproteobacteria;o__Pelagibacterales;f__Pelagibacteraceae;g__Fonsibacter;s__Fonsibacter sp016882225	GCA_016882225.1	Temperate	MAG	Freshwater	Lake Tanganyika, Tanzania	74.7	2.41	100	30.36	787713	98	835	241	274.38	96.13	3.87	4	40.2243	1	1	0	0	0	16
N-Mw2-16nov23-072		SAR11-IIIb.1	Allofontibacter africanus	d__Bacteria;p__Pseudomonadota;c__Alphaproteobacteria;o__Pelagibacterales;f__Pelagibacteraceae;g__Fonsibacter;s__Fonsibacter sp016882225	GCA_965235915	Tropical	MAG	Freshwater	Lake Malawi, Malawi	90.36	4.82	100	28.727	1153035	10	1240	258	291.06	94.76	5.24	6	47.4658	1	1	0	0	0	31
N-Mw5-13nov23-049		SAR11-IIIb.1	Allofontibacter africanus	d__Bacteria;p__Pseudomonadota;c__Alphaproteobacteria;o__Pelagibacterales;f__Pelagibacteraceae;g__Fonsibacter;s__Fonsibacter sp016882225	GCA_965235835	Tropical	MAG	Freshwater	Lake Malawi, Malawi	86.75	2.41	100	29.721	873334	10	1003	233	272.8	94.78	5.22	5	44.4863	1	1	0	0	0	26
N-Mw13-23nov23-097		SAR11-IIIb.1	Allofontibacter africanus	d__Bacteria;p__Pseudomonadota;c__Alphaproteobacteria;o__Pelagibacterales;f__Pelagibacteraceae;g__Fonsibacter;s__Fonsibacter sp016882225	GCA_965235965	Tropical	MAG	Freshwater	Lake Malawi, Malawi	82.53	1.2	100	28.836	1246959	7	1333	261	291.71	94.45	5.55	7	50.8985	1	2	0	1	1	28
N-Mw11-20nov23-094	not in tree	SAR11-IIIb.1	Allofontibacter africanus	d__Bacteria;p__Pseudomonadota;c__Alphaproteobacteria;o__Pelagibacterales;f__Pelagibacteraceae;g__Fonsibacter;s__Fonsibacter sp016882225	GCA_965236045	Tropical	MAG	Freshwater	Lake Malawi, Malawi	48.19	1.2	0	28.724	1145882	11	1232	259.5	291.86	95.31	4.69	6	42.669	1	1	0	0	0	19
N-Mw15-23nov23-035	not in tree	SAR11-IIIb.1	Allofontibacter africanus	d__Bacteria;p__Pseudomonadota;c__Alphaproteobacteria;o__Pelagibacterales;f__Pelagibacteraceae;g__Fonsibacter;s__Fonsibacter sp016882225	GCA_965235695	Tropical	MAG	Freshwater	Lake Malawi, Malawi	75.83	6.02	100	28.444	1313575	18	1420	254	285.86	94.11	5.89	7	53.4782	1	2	0	0	0	28
Umea3_bin-0378		SAR11-IIIb.2	Allofontibacter scandinavicus	d__Bacteria;p__Pseudomonadota;c__Alphaproteobacteria;o__Pelagibacterales;f__Pelagibacteraceae;g__Fonsibacter;s__Fonsibacter sp903869725	GCA_903844175.1	Boreal subarctic	MAG	Freshwater	Lake Bjarntjarnan, Sweden	100	0.6	100	29.142	1048824	108	1090	246.5	283.6	96.17	3.83	6	39.5291	3	1	1	1	1	32
VK1_bin-1242		SAR11-IIIb.2	Allofontibacter scandinavicus	d__Bacteria;p__Pseudomonadota;c__Alphaproteobacteria;o__Pelagibacterales;f__Pelagibacteraceae;g__Fonsibacter;s__Fonsibacter sp903869725	GCA_903864245.1	Boreal subarctic	MAG	Freshwater	Lake Valkea Kotinen, Finland	93.98	1.81	100	29.331	1041370	140	1083	241	277.47	96.03	3.97	6	42.4057	3	1	1	1	1	32
Umea2p2_bin-1150		SAR11-IIIb.2	Allofontibacter scandinavicus	d__Bacteria;p__Pseudomonadota;c__Alphaproteobacteria;o__Pelagibacterales;f__Pelagibacteraceae;g__Fonsibacter;s__Fonsibacter sp903869725	GCA_903854225.1	Boreal subarctic	MAG	Freshwater	Lake Bjarntjarnan, Sweden	98.19	1.2	100	29.198	1046451	131	1089	245	280.09	96.3	3.7	6	38.9798	3	1	1	0	1	31
Umea_bin-06116		SAR11-IIIb.2	Allofontibacter scandinavicus	d__Bacteria;p__Pseudomonadota;c__Alphaproteobacteria;o__Pelagibacterales;f__Pelagibacteraceae;g__Fonsibacter;s__Fonsibacter sp903869725	GCA_903824465.1	Boreal subarctic	MAG	Freshwater	Lake Nastjarnen, Sweden	100	0.11	100	28.974	1027718	86	1085	247	288.51	96.27	3.73	6	37.2646	3	1	1	0	0	29
Umea2p1_bin-0712		SAR11-IIIb.2	Allofontibacter scandinavicus	d__Bacteria;p__Pseudomonadota;c__Alphaproteobacteria;o__Pelagibacterales;f__Pelagibacteraceae;g__Fonsibacter;s__Fonsibacter sp903869725	GCA_903889095.1	Boreal subarctic	MAG	Freshwater	Lake Bjarntjarnan, Sweden	98.19	1.81	100	29.296	1081178	140	1138	236	278.28	95.56	4.44	6	46.5694	3	1	1	0	1	32
Umea2_bin-2667		SAR11-IIIb.2	Allofontibacter scandinavicus	d__Bacteria;p__Pseudomonadota;c__Alphaproteobacteria;o__Pelagibacterales;f__Pelagibacteraceae;g__Fonsibacter;s__Fonsibacter sp903869725	GCA_903860105.1	Boreal subarctic	MAG	Freshwater	Lake Bjarntjarnan, Sweden	96.39	0.6	100	29.149	1067050	117	1110	246	282.88	96.16	3.84	5	40.0254	3	1	1	0	1	32
KR_bin-3261		SAR11-IIIb.2	Allofontibacter scandinavicus	d__Bacteria;p__Pseudomonadota;c__Alphaproteobacteria;o__Pelagibacterales;f__Pelagibacteraceae;g__Fonsibacter;s__Fonsibacter sp903869725	GCA_903839655.1	Boreal subarctic	MAG	Freshwater	Lake Keskinen Rajajarvi, Finland	92.77	4.33	85.71	29.053	1067826	152	1130	232.5	269.74	95.52	4.48	6	47.2974	3	1	1	1	1	31
YR_bin-3962		SAR11-IIIb.2	Allofontibacter scandinavicus	d__Bacteria;p__Pseudomonadota;c__Alphaproteobacteria;o__Pelagibacterales;f__Pelagibacteraceae;g__Fonsibacter;s__Fonsibacter sp903869725	GCA_903893005.1	Boreal subarctic	MAG	Freshwater	Lake Ylinen Rajajarvi, Finland	93.37	0	0	29.361	965763	131	1006	245	281.87	96.3	3.7	6	39.5903	3	1	0	0	0	25
KR2_bin-1077		SAR11-IIIb.2	Allofontibacter scandinavicus	d__Bacteria;p__Pseudomonadota;c__Alphaproteobacteria;o__Pelagibacterales;f__Pelagibacteraceae;g__Fonsibacter;s__Fonsibacter sp903869725	GCA_903886435.1	Boreal subarctic	MAG	Freshwater	Lake Keskinen Rajajarvi, Finland	93.98	0	0	29.298	1042527	150	1099	238	275.6	95.99	4.01	6	42.6188	3	1	0	0	0	28
VK_bin-1211		SAR11-IIIb.2	Allofontibacter scandinavicus	d__Bacteria;p__Pseudomonadota;c__Alphaproteobacteria;o__Pelagibacterales;f__Pelagibacteraceae;g__Fonsibacter;s__Fonsibacter sp903869725	GCA_903918815.1	Boreal subarctic	MAG	Freshwater	Lake Valkea Kotinen, Finland	93.98	2.41	50	29.256	1083925	152	1114	235.5	276.73	95.67	4.33	6	46.934	3	1	1	0	0	33
KR1_bin-0258		SAR11-IIIb.2	Allofontibacter scandinavicus	d__Bacteria;p__Pseudomonadota;c__Alphaproteobacteria;o__Pelagibacterales;f__Pelagibacteraceae;g__Fonsibacter;s__Fonsibacter sp903869725	GCA_903836815.1	Boreal subarctic	MAG	Freshwater	Lake Keskinen Rajajarvi, Finland	90.96	1.31	100	29.122	1005715	155	1034	244	276.76	96.46	3.54	5	39.3039	3	1	0	0	0	26
AM_bin-3698		SAR11-IIIb.2	Allofontibacter scandinavicus	d__Bacteria;p__Pseudomonadota;c__Alphaproteobacteria;o__Pelagibacterales;f__Pelagibacteraceae;g__Fonsibacter;s__Fonsibacter sp903869725	GCA_903869725.1	Boreal subarctic	MAG	Freshwater	Alinen Mustajärvi, Finland	100	3.31	0	28.881	1121759	48	1161	256	297.88	95.45	4.55	7	43.9157	1	1	2	1	1	51
AM1_bin-0028		SAR11-IIIb.2	Allofontibacter scandinavicus	d__Bacteria;p__Pseudomonadota;c__Alphaproteobacteria;o__Pelagibacterales;f__Pelagibacteraceae;g__Fonsibacter;s__Fonsibacter sp903869725	GCA_903874225.1	Boreal subarctic	MAG	Freshwater	Alinen Mustajärvi, Finland	100	0	0	28.923	1083437	55	1125	256	296.74	95.95	4.05	6	39.8093	1	1	1	1	1	31
VK2_bin-0761		SAR11-IIIb.2	Allofontibacter scandinavicus	d__Bacteria;p__Pseudomonadota;c__Alphaproteobacteria;o__Pelagibacterales;f__Pelagibacteraceae;g__Fonsibacter;s__Fonsibacter sp903869725	GCA_903868445.1	Boreal subarctic	MAG	Freshwater	Lake Valkea Kotinen, Finland	95.18	1.31	50	29.332	1032500	134	1068	242.5	278.79	95.43	4.57	6	49.0561	3	1	1	0	0	26
Ki2-D2_bin-0859		SAR11-IIIb.2	Allofontibacter scandinavicus	d__Bacteria;p__Pseudomonadota;c__Alphaproteobacteria;o__Pelagibacterales;f__Pelagibacteraceae;g__Fonsibacter;s__Fonsibacter sp903869725	GCA_903822615.1	Subarctic	MAG	Freshwater	Lake in Kiruna, Sweden	71.13	2.48	33.33	29.996	758846	174	777	231	265.25	96.06	3.94	7	48.0305	1	1	1	0	0	16
Umea3p1_bin-0107		SAR11-IIIb.2	Allofontibacter scandinavicus	d__Bacteria;p__Pseudomonadota;c__Alphaproteobacteria;o__Pelagibacterales;f__Pelagibacteraceae;g__Fonsibacter;s__Fonsibacter sp903869725	GCA_903822775.1	Boreal subarctic	MAG	Freshwater	Lake Bjarntjarnan, Sweden	98.19	3.01	100	29.125	1024751	149	1058	239.5	277.76	95.95	4.05	6	44.0828	3	1	1	0	0	30
Umea3p2_bin-0135		SAR11-IIIb.2	Allofontibacter scandinavicus	d__Bacteria;p__Pseudomonadota;c__Alphaproteobacteria;o__Pelagibacterales;f__Pelagibacteraceae;g__Fonsibacter;s__Fonsibacter sp903869725	GCA_903902595.1	Boreal subarctic	MAG	Freshwater	Lake Bjarntjarnan, Sweden	83.73	1.42	33.33	30.074	901324	161	938	232	270.34	95.9	4.1	7	45.7385	4	1	1	0	0	26
Kiruna_bin-10871		SAR11-IIIb.2	Allofontibacter scandinavicus	d__Bacteria;p__Pseudomonadota;c__Alphaproteobacteria;o__Pelagibacterales;f__Pelagibacteraceae;g__Fonsibacter;s__Fonsibacter sp903869725	GCA_903866245.1	Subarctic	MAG	Freshwater	Lake in Kiruna, Sweden	95.58	2.52	66.67	29.288	1005008	132	1065	235	273.86	96.21	3.79	6	39.7237	2	1	0	0	0	25
Umea3p4_bin-0316		SAR11-IIIb.2	Allofontibacter scandinavicus	d__Bacteria;p__Pseudomonadota;c__Alphaproteobacteria;o__Pelagibacterales;f__Pelagibacteraceae;g__Fonsibacter;s__Fonsibacter sp903869725	GCA_903837935.1	Boreal subarctic	MAG	Freshwater	Lake Bjarntjarnan, Sweden	87.95	2.52	0	29.721	929444	170	938	243.5	277.09	96.79	3.21	6	37.393	3	1	1	0	0	28
Umea3p3-bin-1192		SAR11-IIIb.2	Allofontibacter scandinavicus	d__Bacteria;p__Pseudomonadota;c__Alphaproteobacteria;o__Pelagibacterales;f__Pelagibacteraceae;g__Fonsibacter;s__Fonsibacter sp903869725	GCA_903907455.1	Boreal subarctic	MAG	Freshwater	Lake Bjarntjarnan, Sweden	68.98	0.2	100	30.31	801020	224	779	232	271.96	96.55	3.45	6	47.7872	2	0	0	0	0	18
YR2_bin-0491		SAR11-IIIb.2	Allofontibacter scandinavicus	d__Bacteria;p__Pseudomonadota;c__Alphaproteobacteria;o__Pelagibacterales;f__Pelagibacteraceae;g__Fonsibacter;s__Fonsibacter sp903869725	GCA_903905535.1	Boreal subarctic	MAG	Freshwater	Lake Ylinen Rajajarvi, Finland	56.63	0	0	30.139	650755	99	659	243	282.37	96.21	3.79	6	42.816	1	1	1	0	1	18
Ki2-D1-bin-0906		SAR11-IIIb.2	Allofontibacter scandinavicus	d__Bacteria;p__Pseudomonadota;c__Alphaproteobacteria;o__Pelagibacterales;f__Pelagibacteraceae;g__Fonsibacter;s__Fonsibacter sp903869725	GCA_903899565.1	Subarctic	MAG	Freshwater	Lake in Kiruna, Sweden	51.49	1.53	25	30.397	651198	198	666	207	249.89	96.5	3.5	7	46.6926	1	0	0	0	0	11
AM2-bin-0866		SAR11-IIIb.2	Allofontibacter scandinavicus	d__Bacteria;p__Pseudomonadota;c__Alphaproteobacteria;o__Pelagibacterales;f__Pelagibacteraceae;g__Fonsibacter;s__Fonsibacter sp903869725	GCA_903875305.1	Boreal subarctic	MAG	Freshwater	Alinen Mustajärvi, Finland	67.97	0.11	0	30.604	736667	220	736	207.5	255.49	96.15	3.85	8	52.2855	2	1	0	0	0	21
SCGC_AAA280-B11		SAR11-IIIb.3		d__Bacteria;p__Pseudomonadota;c__Alphaproteobacteria;o__Pelagibacterales;f__Pelagibacteraceae;g__Fonsibacter;s__Fonsibacter sp000371745	GCA_000371745.1	Temperate	SAG	Freshwater	Lake Damariscotta, USA	51.24	0	0	29.845	674250	47	756	245	271.97	95.93	4.07	7	37.8444	1	1	1	1	1	15
3300027749-48		SAR11-IIIb.3		d__Bacteria;p__Pseudomonadota;c__Alphaproteobacteria;o__Pelagibacterales;f__Pelagibacteraceae;g__Fonsibacter;s__Fonsibacter sp000371745	_	Temperate	MAG	Freshwater	Lake Croche, Canada	90.31	4.82	100	29.762	838683	74	885	248	287.48	96.75	3.25	5	32.6903	1	0	0	0	0	23
Umea1p2-bin-1062		SAR11-IIIb.4	Allofontibacter borealis	d__Bacteria;p__Pseudomonadota;c__Alphaproteobacteria;o__Pelagibacterales;f__Pelagibacteraceae;g__Fonsibacter;s__	GCA_903928985.1	Boreal subarctic	MAG	Freshwater	Lake Bjarntjarnan, Sweden	84.94	1.49	75	30.697	879262	243	876	228.5	262.34	97.01	2.99	6	39.8619	2	1	0	0	0	23
Umea1p1-bin-338		SAR11-IIIb.4	Allofontibacter borealis	d__Bacteria;p__Pseudomonadota;c__Alphaproteobacteria;o__Pelagibacterales;f__Pelagibacteraceae;g__Fonsibacter;s__	GCA_903903145.1	Boreal subarctic	MAG	Freshwater	Lake Nastjarnen, Sweden	92.17	4.82	100	30.552	989442	246	1019	226	260.66	96.85	3.15	5	38.9975	1	1	0	0	0	25
Umea1-bin-0681		SAR11-IIIb.4	Allofontibacter borealis	d__Bacteria;p__Pseudomonadota;c__Alphaproteobacteria;o__Pelagibacterales;f__Pelagibacteraceae;g__Fonsibacter;s__	GCA_903912025.1	Boreal subarctic	MAG	Freshwater	Lake Nastjarnen, Sweden	89.05	1.81	100	30.517	1061639	269	1074	234.5	264.93	96.84	3.16	5	40.2518	1	3	0	0	0	25
Umea-bin-09620		SAR11-IIIb.4	Allofontibacter borealis	d__Bacteria;p__Pseudomonadota;c__Alphaproteobacteria;o__Pelagibacterales;f__Pelagibacteraceae;g__Fonsibacter;s__	GCA_903909545.1	Boreal subarctic	MAG	Freshwater	Lake Bjarntjarnan, Sweden	96.39	0.11	0	30.245	976884	243	997	231	260.15	96.69	3.31	5	41.592	1	1	0	0	0	20
Ki3-D2-bin-0457		SAR11-IIIb.5		d__Bacteria;p__Pseudomonadota;c__Alphaproteobacteria;o__Pelagibacterales;f__Pelagibacteraceae;g__Fonsibacter;s__	GCA_903867195.1	Subarctic	MAG	Freshwater	Lake in Kiruna, Sweden	71.06	4.45	83.33	29.962	710862	239	736	204.5	236.6	97.36	2.64	4	36.4097	0	1	0	0	0	13
LinL5-bin-0142		SAR11-IIIb.5		d__Bacteria;p__Pseudomonadota;c__Alphaproteobacteria;o__Pelagibacterales;f__Pelagibacteraceae;g__Fonsibacter;s__	GCA_903856515.1	Boreal subarctic	MAG	Freshwater	Lake Parsen, Sweden	53.82	0.25	100	30.741	613064	217	647	208	236.83	97.3	2.7	4	37.1528	1	1	0	0	0	9
Ki3-D3-bin-0033		SAR11-IIIb.5		d__Bacteria;p__Pseudomonadota;c__Alphaproteobacteria;o__Pelagibacterales;f__Pelagibacteraceae;g__Fonsibacter;s__	GCA_903894405.1	Subarctic	MAG	Freshwater	Lake in Kiruna, Sweden	78.56	4.93	100	30.44	829484	255	868	211	244.95	96.7	3.3	5	42.8638	1	1	0	0	0	19
Ki3-D1-bin-0962		SAR11-IIIb.5		d__Bacteria;p__Pseudomonadota;c__Alphaproteobacteria;o__Pelagibacterales;f__Pelagibacteraceae;g__Fonsibacter;s__	GCA_903822615.1	Subarctic	MAG	Freshwater	Lake in Kiruna, Sweden	86.33	2.13	85.71	30.347	881555	232	908	222	252.64	96.72	3.28	5	41.2322	1	0	0	0	0	22
Kiruna3-bin-0622		SAR11-IIIb.5		d__Bacteria;p__Pseudomonadota;c__Alphaproteobacteria;o__Pelagibacterales;f__Pelagibacteraceae;g__Fonsibacter;s__	GCA_903903005.1	Subarctic	MAG	Freshwater	Lake in Kiruna, Sweden	69.91	4.34	100	30.048	693302	225	703	216	249.34	97.07	2.93	5	40.7194	1	1	0	0	0	15
LinL3-bin-0761		SAR11-IIIb.5		d__Bacteria;p__Pseudomonadota;c__Alphaproteobacteria;o__Pelagibacterales;f__Pelagibacteraceae;g__Fonsibacter;s__	GCA_903820825.1	Boreal subarctic	MAG	Freshwater	Lake Bengtsgolen, Sweden	61.85	1.31	100	29.794	629783	190	643	222	252.28	97.93	2.07	5	27.4286	0	1	0	0	0	18
Kiruna-bin-05406		SAR11-IIIb.5		d__Bacteria;p__Pseudomonadota;c__Alphaproteobacteria;o__Pelagibacterales;f__Pelagibacteraceae;g__Fonsibacter;s__	GCA_903897585.1	Subarctic	MAG	Freshwater	Lake in Kiruna, Sweden	65.46	0	0	30.422	643506	208	654	217.5	242.89	96.09	3.91	6	54.1075	1	1	0	0	0	11
Baikal-deep-G36		SAR11-IIIb.6	Allofontibacter bakalensis	d__Bacteria;p__Pseudomonadota;c__Alphaproteobacteria;o__Pelagibacterales;f__Pelagibacteraceae;g__Fonsibacter;s__Fonsibacter sp009693745	GCA_009693745.1	Continental	MAG	Freshwater	Lake Baikal, Russia	95.18	3.89	100	29.391	997510	66	1055	254	286.81	96.31	3.69	5	36.2673	1	1	1	0	1	25
SI039_bin95		SAR11-IIIb.7		d__Bacteria;p__Pseudomonadota;c__Alphaproteobacteria;o__Pelagibacterales;f__Pelagibacteraceae;g__Fonsibacter;s__Fonsibacter sp018658635	GCA_018658635.1	Temperate	MAG	Brackish	Saanich Inlet, Canada	83.95	2.48	100	29.303	828789	116	880	245	271.89	96.53	3.47	5	36.354	2	1	0	0	0	27
N-InaH-25sep22-C54		SAR11-IIIb.7		d__Bacteria;p__Pseudomonadota;c__Alphaproteobacteria;o__Pelagibacterales;f__Pelagibacteraceae;g__Fonsibacter;s__Fonsibacter sp018658635	GCA_965244885	Humid Temperate	MAG	Freshwater	Lake Inawashiro, Japan	60.24	0	0	29.623	918210	1	1085	208	259.44	94.17	5.83	6	49.786	3	2	1	1	1	22
WB5_1B_059		SAR11-IIIb.7		d__Bacteria;p__Pseudomonadota;c__Alphaproteobacteria;o__Pelagibacterales;f__Pelagibacteraceae;g__Fonsibacter;s__Fonsibacter sp018658635	GCA_009921875.1	Subtropical	MAG	Freshwater	Lake Lanier, USA	61.23	4.82	40	29.395	759343	236	822	209.5	237.1	96.24	3.76	5	46.5342	1	0	0	0	0	18
WB5_1A_055		SAR11-IIIb.7		d__Bacteria;p__Pseudomonadota;c__Alphaproteobacteria;o__Pelagibacterales;f__Pelagibacteraceae;g__Fonsibacter;s__Fonsibacter sp018658635	GCA_009928175.1	Subtropical	MAG	Freshwater	Lake Lanier, USA	52.39	2.41	0	29.257	668641	205	722	208	243.45	96.74	3.26	5	40.4787	0	0	0	0	0	13
SCGC_AAA027-J10		SAR11-IIIb.8	Allofontibacter medardicus	d__Bacteria;p__Pseudomonadota;c__Alphaproteobacteria;o__Pelagibacterales;f__Pelagibacteraceae;g__Fonsibacter;s__Fonsibacter sp018882565	GCA_000371825.1	Temperate	SAG	Freshwater	Lake Mendota, USA	69.56	0	0	29.76	792980	82	860	247	278.53	96.56	3.44	6	33.0387	1	0	1	1	1	26
N-Balt1-05jul22-002		SAR11-IIIb.8	Allofontibacter medardicus	d__Bacteria;p__Pseudomonadota;c__Alphaproteobacteria;o__Pelagibacterales;f__Pelagibacteraceae;g__Fonsibacter;s__Fonsibacter sp018882565	GCA_965235295	Temperate	MAG	Freshwater	Vistula Lagoon, freshwater part, Poland	100	1.2	100	29.901	1181538	2	1377	221	262.77	93.07	6.93	8	57.8692	1	1	2	1	2	34
N-Balt3-05jul22-017		SAR11-IIIb.8	Allofontibacter medardicus	d__Bacteria;p__Pseudomonadota;c__Alphaproteobacteria;o__Pelagibacterales;f__Pelagibacteraceae;g__Fonsibacter;s__Fonsibacter sp018882565	GCA_965235875	Temperate	MAG	Freshwater	Vistula River, Poland	81.93	3.61	100	29.536	950329	6	1083	237	274.27	95.11	4.89	5	41.8954	1	1	1	0	1	30
ZLKRG47		SAR11-IIIb.8	Allofontibacter medardicus	d__Bacteria;p__Pseudomonadota;c__Alphaproteobacteria;o__Pelagibacterales;f__Pelagibacteraceae;g__Fonsibacter;s__Fonsibacter sp018882565	GCA_018882565.1	Subtropical	MAG	Freshwater	Lake in Sao Paulo Zoo, Brazil	93.37	0	0	29.841	981128	101	1046	243	280.15	95.97	4.03	5	40.6578	1	1	1	0	1	28
SCGC_AAA027-L15		SAR11-IIIb.8	Allofontibacter medardicus	d__Bacteria;p__Pseudomonadota;c__Alphaproteobacteria;o__Pelagibacterales;f__Pelagibacteraceae;g__Fonsibacter;s__Fonsibacter sp018882565	GCA_000371865.1	Temperate	SAG	Freshwater	Lake Mendota, USA	68.68	0	0	29.387	719587	56	767	250	287.81	96.63	3.37	4	32.3658	0	0	0	0	0	18
SCGC_AAA027-C06		SAR11-IIIb.8	Allofontibacter medardicus	d__Bacteria;p__Pseudomonadota;c__Alphaproteobacteria;o__Pelagibacterales;f__Pelagibacteraceae;g__Fonsibacter;s__Fonsibacter sp018882565	GCA_000364545.1	Temperate	SAG	Freshwater	Lake Damariscotta, USA	82.29	1.81	100	29.611	775384	90	838	246	279	96.79	3.21	5	31.891	2	1	1	0	2	14
ME-33		SAR11-IIIb.8	Allofontibacter medardicus	d__Bacteria;p__Pseudomonadota;c__Alphaproteobacteria;o__Pelagibacterales;f__Pelagibacteraceae;g__Fonsibacter;s__Fonsibacter sp018882565	GCA_965233985	Temperate	Isolate	Freshwater	Lake Medard, Czechia	98.8	0	0	29.256	1112841	1	1196	259	295.57	95.74	4.26	5	38.6313	1	1	1	1	1	31
ME-31		SAR11-IIIb.8	Allofontibacter medardicus	d__Bacteria;p__Pseudomonadota;c__Alphaproteobacteria;o__Pelagibacterales;f__Pelagibacteraceae;g__Fonsibacter;s__Fonsibacter sp018882565	GCA_965234115	Temperate	Isolate	Freshwater	Lake Medard, Czechia	100	0	0	29.336	1102656	1	1177	261	298.55	96.05	3.95	5	36.0729	1	1	1	1	1	31
ME-17		SAR11-IIIb.8	Allofontibacter medardicus	d__Bacteria;p__Pseudomonadota;c__Alphaproteobacteria;o__Pelagibacterales;f__Pelagibacteraceae;g__Fonsibacter;s__Fonsibacter sp018882565	GCA_965235075	Temperate	Isolate	Freshwater	Lake Medard, Czechia	97.59	0	0	29.605	1059009	1	1152	254	292.18	95.81	4.19	5	37.5448	1	1	1	1	1	31
ME-20		SAR11-IIIb.8	Allofontibacter medardicus	d__Bacteria;p__Pseudomonadota;c__Alphaproteobacteria;o__Pelagibacterales;f__Pelagibacteraceae;g__Fonsibacter;s__Fonsibacter sp018882565	GCA_965234055	Temperate	Isolate	Freshwater	Lake Medard, Czechia	98.8	0	0	29.698	1078651	1	1151	260	298.02	95.86	4.14	5	37.7504	1	1	1	1	1	31
ME-18		SAR11-IIIb.8	Allofontibacter medardicus	d__Bacteria;p__Pseudomonadota;c__Alphaproteobacteria;o__Pelagibacterales;f__Pelagibacteraceae;g__Fonsibacter;s__Fonsibacter sp018882565	GCA_965234185	Temperate	Isolate	Freshwater	Lake Medard, Czechia	97.59	0	0	29.504	1087980	1	1170	257	295.58	95.81	4.19	5	37.9942	1	1	1	1	1	31
Fonsibacter_30-26		SAR11-IIIb.9	Allofontibacter abundans	d__Bacteria;p__Pseudomonadota;c__Alphaproteobacteria;o__Pelagibacterales;f__Pelagibacteraceae;g__Fonsibacter;s__Fonsibacter sp000419465	_	Temperate	MAG	Freshwater	End pit lake, Canada	100	0	0	29.611	1136868	1	1229	255	294.22	95.85	4.15	5	37.4376	1	1	1	1	1	31
MiE-29		SAR11-IIIb.9	Allofontibacter abundans	d__Bacteria;p__Pseudomonadota;c__Alphaproteobacteria;o__Pelagibacterales;f__Pelagibacteraceae;g__Fonsibacter;s__	GCA_965235095	Temperate	Isolate	Freshwater	Lake Milada, Czechia	100	0	0	29.382	1121327	1	1199	261	296.36	95.58	4.42	5	40.3168	1	1	1	1	1	31
SCGC_AAA028-C07		SAR11-IIIb.9	Allofontibacter abundans	d__Bacteria;p__Pseudomonadota;c__Alphaproteobacteria;o__Pelagibacterales;f__Pelagibacteraceae;g__Fonsibacter;s__Fonsibacter sp000419465	GCA_000419465.1	Temperate	SAG	Freshwater	Lake Mendota, USA	74.12	0.11	0	29.532	846566	32	931	253	285.08	96.37	3.63	5	33.24	1	1	0	1	0	15
MKE-138		SAR11-IIIb.9	Allofontibacter abundans	d__Bacteria;p__Pseudomonadota;c__Alphaproteobacteria;o__Pelagibacterales;f__Pelagibacteraceae;g__Fonsibacter;s__	GCA_965233975	Temperate	Isolate	Freshwater	Klicava Reservoir, Czechia	98.8	0	0	29.619	1065806	1	1140	258	297.39	95.93	4.07	5	37.0444	1	1	1	1	1	31
SCGC_AAA028-D10		SAR11-IIIb.10	Allofontibacter temperatus	d__Bacteria;p__Pseudomonadota;c__Alphaproteobacteria;o__Pelagibacterales;f__Pelagibacteraceae;g__Fonsibacter;s__Fonsibacter sp000510845	GCA_000510845.1	Temperate	SAG	Freshwater	Lake Mendota, USA	81.64	0.07	0	29.571	925141	57	1005	247	281.01	95.33	4.67	6	43.8306	1	1	1	1	1	29
N-ChH-26sep22-024		SAR11-IIIb.10	Allofontibacter temperatus	d__Bacteria;p__Pseudomonadota;c__Alphaproteobacteria;o__Pelagibacterales;f__Pelagibacteraceae;g__Fonsibacter;s__Fonsibacter sp000510845	GCA_965236215	Humid Temperate	MAG	Freshwater	Lake Chuzenji, Japan	68.67	0	0	29.397	894851	8	1047	224	265.52	94.2	5.8	5	48.7484	1	1	1	1	1	27
N-InaH-25sep22-023		SAR11-IIIb.10	Allofontibacter temperatus	d__Bacteria;p__Pseudomonadota;c__Alphaproteobacteria;o__Pelagibacterales;f__Pelagibacteraceae;g__Fonsibacter;s__	GCA_965236185	Humid Temperate	MAG	Freshwater	Lake Inawashiro, Japan	68.67	3.61	66.67	29.611	1041213	29	1211	223	267.32	94.45	5.55	6	47.0733	1	1	0	0	0	19
N-ToyH-29sep22-008		SAR11-IIIb.10	Allofontibacter temperatus	d__Bacteria;p__Pseudomonadota;c__Alphaproteobacteria;o__Pelagibacterales;f__Pelagibacteraceae;g__Fonsibacter;s__Fonsibacter sp000510845	GCA_965236195	Temperate	MAG	Freshwater	Lake Toya, Japan	85.54	2.41	100	29.567	1240576	13	1500	211.5	251.04	92.72	7.28	9	59.0883	1	1	2	1	2	38
LBMAG_Alphaproteobacteria_hypo.bin1_LD12		SAR11-IIIb.10	Allofontibacter temperatus	d__Bacteria;p__Pseudomonadota;c__Alphaproteobacteria;o__Pelagibacterales;f__Pelagibacteraceae;g__Fonsibacter;s__Fonsibacter sp000510845	GCA_014190415.1	Subtropical	MAG	Freshwater	Lake Biwa, Japan	86.75	2.48	66.67	29.903	955200	118	1028	238.5	272.17	96.3	3.7	5	37.7068	1	1	0	0	0	27
MsE-30jul19-LR-39		SAR11-IIIb.10	Allofontibacter temperatus	d__Bacteria;p__Pseudomonadota;c__Alphaproteobacteria;o__Pelagibacterales;f__Pelagibacteraceae;g__Fonsibacter;s__Fonsibacter sp000510845	GCA_965235335	Temperate	MAG	Freshwater	Lake Most, Czechia	91.57	4.82	100	29.483	978636	25	1129	225	265.48	94.8	5.2	6	44.9541	0	0	1	0	1	29
ZE-13nov19-LR-1		SAR11-IIIb.10	Allofontibacter temperatus	d__Bacteria;p__Pseudomonadota;c__Alphaproteobacteria;o__Pelagibacterales;f__Pelagibacteraceae;g__Fonsibacter;s__Fonsibacter sp000510845	GCA_965235175	Temperate	MAG	Freshwater	Lake Zurich, Switzerland	95.18	1.2	100	29.573	983619	9	1134	231	269.68	94.31	5.69	5	48.4481	1	1	1	0	1	30
ZE-03apr19-LR-3		SAR11-IIIb.10	Allofontibacter temperatus	d__Bacteria;p__Pseudomonadota;c__Alphaproteobacteria;o__Pelagibacterales;f__Pelagibacteraceae;g__Fonsibacter;s__Fonsibacter sp000510845	GCA_964203055.1	Temperate	MAG	Freshwater	Lake Zurich, Switzerland	93.98	0	0	29.363	937461	3	1090	230	271.78	95.48	4.52	5	38.0448	1	1	0	0	0	28
N-ChE-26sep22-047		SAR11-IIIb.10	Allofontibacter temperatus	d__Bacteria;p__Pseudomonadota;c__Alphaproteobacteria;o__Pelagibacterales;f__Pelagibacteraceae;g__Fonsibacter;s__Fonsibacter sp000510845	GCA_965235905	Humid Temperate	MAG	Freshwater	Lake Chuzenji, Japan	89.16	4.82	100	29.273	997882	6	1149	231	273.65	95.27	4.73	5	40.166	0	1	0	0	0	24
3300027940-3		SAR11-IIIb.10	Allofontibacter temperatus	d__Bacteria;p__Pseudomonadota;c__Alphaproteobacteria;o__Pelagibacterales;f__Pelagibacteraceae;g__Fonsibacter;s__Fonsibacter sp000510845	_	Temperate	MAG	Freshwater	Riverbed sediment of Columbia River, USA	71.93	0.29	33.33	30.098	614497	82	636	240	278.31	96.17	3.83	5.5	41.2439	1	0	0	0	0	15
SupBloom_Metag_065		SAR11-IIIb.10	Allofontibacter temperatus	d__Bacteria;p__Pseudomonadota;c__Alphaproteobacteria;o__Pelagibacterales;f__Pelagibacteraceae;g__Fonsibacter;s__Fonsibacter sp000510845	GCA_016463655.1	Continental	MAG	Freshwater	Lake Superior, USA	77.6	0	0	29.224	724168	123	743	239	275.17	96.2	3.8	4	43.0297	1	1	0	0	0	20
3300026931-2		SAR11-IIIb.10	Allofontibacter temperatus	d__Bacteria;p__Pseudomonadota;c__Alphaproteobacteria;o__Pelagibacterales;f__Pelagibacteraceae;g__Fonsibacter;s__Fonsibacter sp000510845	_	Temperate	MAG	Freshwater	Riverbed sediment of Columbia River, USA	81.93	1.86	0	29.853	942686	81	1038	231	271.82	96.36	3.64	5	34.7662	2	1	0	0	0	31
MoE-02may19-314		SAR11-IIIb.10	Allofontibacter temperatus	d__Bacteria;p__Pseudomonadota;c__Alphaproteobacteria;o__Pelagibacterales;f__Pelagibacteraceae;g__Fonsibacter;s__Fonsibacter sp000510845	GCA_945901925.1	Temperate	MAG	Freshwater	Mondsee, Austria	80.39	3.27	100	29.552	810830	144	866	233	264.67	96.83	3.17	4.5	34.6752	2	1	0	0	0	20
MoH-23oct19-50		SAR11-IIIb.10	Allofontibacter temperatus	d__Bacteria;p__Pseudomonadota;c__Alphaproteobacteria;o__Pelagibacterales;f__Pelagibacteraceae;g__Fonsibacter;s__Fonsibacter sp000510845	GCA_965235245	Temperate	MAG	Freshwater	Mondsee, Austria	68.67	2.74	66.67	29.626	578207	104	589	245	274.66	97.52	2.48	5	28.8249	1	1	0	0	0	13
3300027563-31		SAR11-IIIb.10	Allofontibacter temperatus	d__Bacteria;p__Pseudomonadota;c__Alphaproteobacteria;o__Pelagibacterales;f__Pelagibacteraceae;g__Fonsibacter;s__Fonsibacter sp000510845	_	Continental	MAG	Freshwater	Lake Michigan, USA	55.37	0	0	30.44	505146	93	533	229	264.56	96.53	3.47	5	38.5617	1	1	0	0	0	14
3300027688-45		SAR11-IIIb.10	Allofontibacter temperatus	d__Bacteria;p__Pseudomonadota;c__Alphaproteobacteria;o__Pelagibacterales;f__Pelagibacteraceae;g__Fonsibacter;s__Fonsibacter sp000510845	_	Continental	MAG	Freshwater	Lake Michigan, USA	69.44	2.52	66.67	30.228	639292	118	662	232.5	268.51	95.5	4.5	5	51.5609	1	0	0	0	0	14
3300027224-14		SAR11-IIIb.10	Allofontibacter temperatus	d__Bacteria;p__Pseudomonadota;c__Alphaproteobacteria;o__Pelagibacterales;f__Pelagibacteraceae;g__Fonsibacter;s__Fonsibacter sp000510845	_	Temperate	MAG	Brackish	Columbia River estuary, USA	54.02	0	0	29.493	511116	78	525	244	277.37	96.47	3.53	5	38.7763	3	1	0	0	0	17
3300027211-13		SAR11-IIIb.10	Allofontibacter temperatus	d__Bacteria;p__Pseudomonadota;c__Alphaproteobacteria;o__Pelagibacterales;f__Pelagibacteraceae;g__Fonsibacter;s__Fonsibacter sp000510845	_	Temperate	MAG	Brackish	Columbia River estuary, USA	57.39	0.11	100	29.648	506516	77	530	244	277.41	97.41	2.59	4.5	28.118	1	1	0	0	0	13
3300027756-64		SAR11-IIIb.10	Allofontibacter temperatus	d__Bacteria;p__Pseudomonadota;c__Alphaproteobacteria;o__Pelagibacterales;f__Pelagibacteraceae;g__Fonsibacter;s__Fonsibacter sp000510845	_	Continental	MAG	Freshwater	Lake Michigan, USA	77.51	2.41	100	29.215	619418	91	656	232.5	272.87	96.86	3.14	4	33.4914	0	0	0	0	0	15
3300027149-15		SAR11-IIIb.10	Allofontibacter temperatus	d__Bacteria;p__Pseudomonadota;c__Alphaproteobacteria;o__Pelagibacterales;f__Pelagibacteraceae;g__Fonsibacter;s__Fonsibacter sp000510845	_	Continental	MAG	Freshwater	St. Lawrence River, USA	60.17	0	0	30.571	881047	158	911	215	265.76	95.65	4.35	6	49.5013	1	1	0	0	0	20
3300027150-18		SAR11-IIIb.10	Allofontibacter temperatus	d__Bacteria;p__Pseudomonadota;c__Alphaproteobacteria;o__Pelagibacterales;f__Pelagibacteraceae;g__Fonsibacter;s__Fonsibacter sp000510845	_	Continental	MAG	Freshwater	St. Lawrence River, USA	67.36	0	0	30.22	625378	104	644	232	277.62	95.99	4.01	6	45.0827	1	1	0	0	0	16
3300027147-14		SAR11-IIIb.10	Allofontibacter temperatus	d__Bacteria;p__Pseudomonadota;c__Alphaproteobacteria;o__Pelagibacterales;f__Pelagibacteraceae;g__Fonsibacter;s__Fonsibacter sp000510845	_	Continental	MAG	Freshwater	St. Lawrence River, USA	68.56	3.01	100	30.507	786399	128	832	228	263.17	96.17	3.83	6	41.993	2	1	0	0	0	14
AH-03may19-33	not in tree	SAR11-IIIb.10	Allofontibacter temperatus	d__Bacteria;p__Pseudomonadota;c__Alphaproteobacteria;o__Pelagibacterales;f__Pelagibacteraceae;g__Fonsibacter;s__Fonsibacter sp000510845	GCA_965235225	Temperate	MAG	Freshwater	Attersee, Austria	49.06	4.22	75	28.927	467898	96	487	236	268.29	97.11	2.89	5	33.6343	0	0	0	0	0	11
ME-04may21-LR-172	not in tree	SAR11-IIIb.10	Allofontibacter temperatus	d__Bacteria;p__Pseudomonadota;c__Alphaproteobacteria;o__Pelagibacterales;f__Pelagibacteraceae;g__Fonsibacter;s__	GCA_965235565	Temperate	MAG	Freshwater	Lake Medard, Czechia	49.06	15.09	100	29.65	731261	26	873	200	255.1	93.23	6.77	8	57.2682	1	1	0	0	0	18
ME-04may21-LR-249	not in tree	SAR11-IIIb.10	Allofontibacter temperatus	d__Bacteria;p__Pseudomonadota;c__Alphaproteobacteria;o__Pelagibacterales;f__Pelagibacteraceae;g__Fonsibacter;s__	GCA_964203195.1	Temperate	MAG	Freshwater	Lake Medard, Czechia	60.24	3.61	100	29.077	953184	16	1191	206	239.91	91.52	8.48	8	67.1987	0	1	2	2	2	27
MiH-22jul19-202	not in tree	SAR11-IIIb.10	Allofontibacter temperatus	d__Bacteria;p__Pseudomonadota;c__Alphaproteobacteria;o__Pelagibacterales;f__Pelagibacteraceae;g__Fonsibacter;s__Fonsibacter sp018882565	GCA_965235525	Temperate	MAG	Freshwater	Lake Milada, Czechia	46.28	2.74	100	29.442	353915	77	347	248	277.15	97.5	2.5	5	30.6505	1	0	0	0	0	7
MiH-16apr19-192	not in tree	SAR11-IIIb.10	Allofontibacter temperatus	d__Bacteria;p__Pseudomonadota;c__Alphaproteobacteria;o__Pelagibacterales;f__Pelagibacteraceae;g__Fonsibacter;s__Fonsibacter sp018882565	GCA_965235555	Temperate	MAG	Freshwater	Lake Milada, Czechia	43.68	1.2	0	29.161	389170	65	383	249	279.05	97.68	2.32	5	28.8562	2	1	0	0	0	8
MsE-30jul19-LR-129	not in tree	SAR11-IIIb.10	Allofontibacter temperatus	d__Bacteria;p__Pseudomonadota;c__Alphaproteobacteria;o__Pelagibacterales;f__Pelagibacteraceae;g__Fonsibacter;s__Fonsibacter sp018882565	GCA_965235235	Temperate	MAG	Freshwater	Lake Most, Czechia	40.53	0	0	30.132	348880	17	377	254	290.63	96.6	3.4	6	32.0919	0	1	0	0	0	10
MsH-01oct19-285	not in tree	SAR11-IIIb.10	Allofontibacter temperatus	d__Bacteria;p__Pseudomonadota;c__Alphaproteobacteria;o__Pelagibacterales;f__Pelagibacteraceae;g__Fonsibacter;s__Fonsibacter sp000510845	GCA_965235485	Temperate	MAG	Freshwater	Lake Most, Czechia	45.78	3.01	100	29.12	386416	75	423	217	256.25	96.24	3.76	5	40.5097	0	0	0	0	0	11
N-BiE-22sep22-080	not in tree	SAR11-IIIb.10	Allofontibacter temperatus	d__Bacteria;p__Pseudomonadota;c__Alphaproteobacteria;o__Pelagibacterales;f__Pelagibacteraceae;g__Fonsibacter;s__	GCA_965235815	Subtropical	MAG	Freshwater	Lake Biwa, Japan	56.95	2.41	100	29.553	416599	10	449	244	273.28	97.56	2.44	5	25.9158	0	1	0	0	0	6
N-BiH-22sep22-023	not in tree	SAR11-IIIb.10	Allofontibacter temperatus	d__Bacteria;p__Pseudomonadota;c__Alphaproteobacteria;o__Pelagibacterales;f__Pelagibacteraceae;g__Fonsibacter;s__Fonsibacter sp000510845	GCA_965236145	Subtropical	MAG	Freshwater	Lake Biwa, Japan	51.81	1.81	50	30.177	612918	5	742	205	249.48	93.32	6.68	8	56.0781	1	1	0	0	0	11
MsH-30jul19-35	not in tree	SAR11-IIIb.10	Allofontibacter temperatus	d__Bacteria;p__Pseudomonadota;c__Alphaproteobacteria;o__Pelagibacterales;f__Pelagibacteraceae;g__Fonsibacter;s__Fonsibacter sp000510845	GCA_965235425	Temperate	MAG	Freshwater	Lake Most, Czechia	80.12	1.81	50	29.429	1064325	63	1621	141	184.43	85.55	14.45	22	93.6147	1	1	1	0	1	30
N-Balt3-05jul22-020	not in tree	SAR11-IIIb.10	Allofontibacter temperatus	d__Bacteria;p__Pseudomonadota;c__Alphaproteobacteria;o__Pelagibacterales;f__Pelagibacteraceae;g__Fonsibacter;s__Fonsibacter sp000419465	GCA_965235945	Temperate	MAG	Freshwater	Vistula River, Poland	98.8	21.69	90.48	29.425	1431776	23	1679	216	255.53	91.65	8.35	8	69.9485	1	1	1	1	1	35
N-ToyE-29sep22-012	not in tree	SAR11-IIIb.10	Allofontibacter temperatus	d__Bacteria;p__Pseudomonadota;c__Alphaproteobacteria;o__Pelagibacterales;f__Pelagibacteraceae;g__Fonsibacter;s__	GCA_965236205	Temperate	MAG	Freshwater	Lake Toya, Japan	96.39	12.65	100	29.229	1157178	2	1341	228	267.33	94.04	5.96	7	50.1315	2	1	0	0	0	34
TrE-25oct19-80	not in tree	SAR11-IIIb.10	Allofontibacter temperatus	d__Bacteria;p__Pseudomonadota;c__Alphaproteobacteria;o__Pelagibacterales;f__Pelagibacteraceae;g__Fonsibacter;s__	GCA_965235505	Temperate	MAG	Freshwater	Traunsee, Austria	48.16	2.92	100	28.71	453309	85	471	239	268.58	97.07	2.93	4	33.7583	0	1	0	0	0	7
N-InaE-25sep22-010		SAR11-IIIb.11	Allofontibacter universalis	d__Bacteria;p__Pseudomonadota;c__Alphaproteobacteria;o__Pelagibacterales;f__Pelagibacteraceae;g__Fonsibacter;s__Fonsibacter sp000371845	GCA_965236175	Humid Temperate	MAG	Freshwater	Lake Inawashiro, Japan	98.8	0	0	29.31	973680	12	1086	246	282.27	95.19	4.81	5	42.0404	1	1	0	0	0	29
LinL5-bin-0670		SAR11-IIIb.11	Allofontibacter universalis	d__Bacteria;p__Pseudomonadota;c__Alphaproteobacteria;o__Pelagibacterales;f__Pelagibacteraceae;g__Fonsibacter;s__Fonsibacter sp000371845	GCA_903846225.1	Boreal subarctic	MAG	Freshwater	Lake Parsen, Sweden	75.79	3.32	91.67	29.966	722618	240	765	203	235.01	96.16	3.84	4	50.7605	1	1	0	0	0	17
LJ-bin-0735		SAR11-IIIb.11	Allofontibacter universalis	d__Bacteria;p__Pseudomonadota;c__Alphaproteobacteria;o__Pelagibacterales;f__Pelagibacteraceae;g__Fonsibacter;s__Fonsibacter sp000371845	GCA_903877195.1	Boreal Temperate	MAG	Freshwater	Lake Lovojarvi, Finland	83.32	4.93	80	30.164	878746	275	947	202	233.53	96.36	3.64	5	45.5692	1	1	0	0	0	25
LJ-7-9m-bin-1186		SAR11-IIIb.11	Allofontibacter universalis	d__Bacteria;p__Pseudomonadota;c__Alphaproteobacteria;o__Pelagibacterales;f__Pelagibacteraceae;g__Fonsibacter;s__Fonsibacter sp000371845	GCA_903832645.1	Boreal Temperate	MAG	Freshwater	Lake Lovojarvi, Finland	75.3	0.78	66.67	30.972	691070	221	706	213.5	246.72	95.74	4.26	5	58.2194	1	1	0	0	1	18
LJ-3-15m-bin-0070		SAR11-IIIb.11	Allofontibacter universalis	d__Bacteria;p__Pseudomonadota;c__Alphaproteobacteria;o__Pelagibacterales;f__Pelagibacteraceae;g__Fonsibacter;s__Fonsibacter sp000371845	GCA_903830505.1	Boreal Temperate	MAG	Freshwater	Lake Lovojarvi, Finland	83.46	2.59	75	30.315	798078	222	835	215	247.3	96.99	3.01	4	37.5109	2	1	0	0	0	23
WB5_1B_032		SAR11-IIIb.11	Allofontibacter universalis	d__Bacteria;p__Pseudomonadota;c__Alphaproteobacteria;o__Pelagibacterales;f__Pelagibacteraceae;g__Fonsibacter;s__Fonsibacter sp000371845	GCA_009922365.1	Subtropical	MAG	Freshwater	Lake Lanier, USA	51	0	0	29.585	548513	206	604	199.5	229.01	97.41	2.59	3	33.2887	2	0	0	0	0	11
SCGC_AAA280-P20		SAR11-IIIb.11	Allofontibacter universalis	d__Bacteria;p__Pseudomonadota;c__Alphaproteobacteria;o__Pelagibacterales;f__Pelagibacteraceae;g__Fonsibacter;s__Fonsibacter sp000371845	GCA_000371845.1	Temperate	SAG	Freshwater	Lake Damariscotta, USA	65.06	0	0	29.561	720523	65	756	250	285.86	95.81	4.19	5	41.611	0	1	1	1	1	21
N-IMU-22jan24-050		SAR11-IIIb.12	Allofontibacter meridianamericanus	d__Bacteria;p__Pseudomonadota;c__Alphaproteobacteria;o__Pelagibacterales;f__Pelagibacteraceae;g__Fonsibacter;s__	GCA_965235635	Subtropical	MAG	Freshwater		95.78	1.2	100	30.962	628115	6	705	249	280.81	94.93	5.07	6	44.6036	0	0	0	1	0	30
N-BarE-26apr23-C31		SAR11-IIIb.13	Allofontibacter lacus	d__Bacteria;p__Pseudomonadota;c__Alphaproteobacteria;o__Pelagibacterales;f__Pelagibacteraceae;g__Fonsibacter;s__Fonsibacter lacus	GCA_965244475	Subtropical	MAG	Freshwater	Lake Baroon, Australia	98.8	0	0	28.954	1155991	1	1296	243	278.03	94.38	5.62	6	48.8219	3	0	1	1	1	32
WB9_1B_004		SAR11-IIIb.13	Allofontibacter lacus	d__Bacteria;p__Pseudomonadota;c__Alphaproteobacteria;o__Pelagibacterales;f__Pelagibacteraceae;g__Fonsibacter;s__Fonsibacter lacus	GCA_010029375.1	Subtropical	MAG	Freshwater	Lake Lanier, USA	80.32	0.44	100	30.201	757732	238	781	208	246.76	97.39	2.61	4	34.5122	2	0	0	0	0	12
WB8_2B_005		SAR11-IIIb.13	Allofontibacter lacus	d__Bacteria;p__Pseudomonadota;c__Alphaproteobacteria;o__Pelagibacterales;f__Pelagibacteraceae;g__Fonsibacter;s__Fonsibacter lacus	GCA_010020645.1	Subtropical	MAG	Freshwater	Lake Lanier, USA	87.64	3.23	60	29.947	804917	252	826	206	245.54	96.83	3.17	4	41.7803	1	0	0	0	0	15
WB7_6_001		SAR11-IIIb.13	Allofontibacter lacus	d__Bacteria;p__Pseudomonadota;c__Alphaproteobacteria;o__Pelagibacterales;f__Pelagibacteraceae;g__Fonsibacter;s__Fonsibacter lacus	GCA_009917785.1	Subtropical	MAG	Freshwater	Lake Lanier, USA	74.59	0.11	0	36.092	1001435	239	1056	202	244.16	95.37	4.63	4	54.1517	3	0	2	0	2	15
WB6_6_002		SAR11-IIIb.13	Allofontibacter lacus	d__Bacteria;p__Pseudomonadota;c__Alphaproteobacteria;o__Pelagibacterales;f__Pelagibacteraceae;g__Fonsibacter;s__Fonsibacter lacus	GCA_009919525.1	Subtropical	MAG	Freshwater	Lake Lanier, USA	75.5	1.31	50	31.465	910564	212	1004	200.5	240.25	96.03	3.97	4	44.056	2	1	2	0	2	16
WB8_6_001		SAR11-IIIb.13	Allofontibacter lacus	d__Bacteria;p__Pseudomonadota;c__Alphaproteobacteria;o__Pelagibacterales;f__Pelagibacteraceae;g__Fonsibacter;s__Fonsibacter lacus	GCA_010021145.1	Subtropical	MAG	Freshwater	Lake Lanier, USA	81.33	0.31	0	35.941	1080034	225	1190	199.5	240.85	94.83	5.17	5	56.0231	4	0	2	0	2	17
WB9_1A_004		SAR11-IIIb.13	Allofontibacter lacus	d__Bacteria;p__Pseudomonadota;c__Alphaproteobacteria;o__Pelagibacterales;f__Pelagibacteraceae;g__Fonsibacter;s__Fonsibacter lacus	GCA_010029435.1	Subtropical	MAG	Freshwater	Lake Lanier, USA	75.61	1.61	100	30.134	720663	218	751	211	249.15	96.88	3.12	5	40.1482	1	0	0	0	0	12
WB7_2A_002		SAR11-IIIb.13	Allofontibacter lacus	d__Bacteria;p__Pseudomonadota;c__Alphaproteobacteria;o__Pelagibacterales;f__Pelagibacteraceae;g__Fonsibacter;s__Fonsibacter lacus	GCA_010021085.1	Subtropical	MAG	Freshwater	Lake Lanier, USA	84.27	0	0	29.701	710404	211	733	211	250.34	97.46	2.54	4	32.5903	0	0	0	0	0	14
WBA_1A_005		SAR11-IIIb.13	Allofontibacter lacus	d__Bacteria;p__Pseudomonadota;c__Alphaproteobacteria;o__Pelagibacterales;f__Pelagibacteraceae;g__Fonsibacter;s__Fonsibacter lacus	GCA_010026345.1	Subtropical	MAG	Freshwater	Lake Lanier, USA	81.33	3.01	100	30.1	769645	239	815	210	244.79	97.01	2.99	4	38.043	1	1	0	0	0	14
WB8_2A_004		SAR11-IIIb.13	Allofontibacter lacus	d__Bacteria;p__Pseudomonadota;c__Alphaproteobacteria;o__Pelagibacterales;f__Pelagibacteraceae;g__Fonsibacter;s__Fonsibacter lacus	GCA_010020685.1	Subtropical	MAG	Freshwater	Lake Lanier, USA	78.92	1.64	62.5	29.821	782242	244	820	216.5	250.53	97.24	2.76	4.5	35.5707	1	0	0	0	0	12
WB6_3B_008		SAR11-IIIb.13	Allofontibacter lacus	d__Bacteria;p__Pseudomonadota;c__Alphaproteobacteria;o__Pelagibacterales;f__Pelagibacteraceae;g__Fonsibacter;s__Fonsibacter lacus	GCA_009919775.1	Subtropical	MAG	Freshwater	Lake Lanier, USA	69.28	3.72	75	30.168	691656	250	726	205	237.29	96.85	3.15	4	43.598	1	0	0	1	1	6
WB6_3A_008		SAR11-IIIb.13	Allofontibacter lacus	d__Bacteria;p__Pseudomonadota;c__Alphaproteobacteria;o__Pelagibacterales;f__Pelagibacteraceae;g__Fonsibacter;s__Fonsibacter lacus	GCA_009919695.1	Subtropical	MAG	Freshwater	Lake Lanier, USA	59.13	0	0	30.458	596973	196	598	218	253.42	97.15	2.85	4	40.3578	0	0	0	0	0	8
WB7_1B_004		SAR11-IIIb.13	Allofontibacter lacus	d__Bacteria;p__Pseudomonadota;c__Alphaproteobacteria;o__Pelagibacterales;f__Pelagibacteraceae;g__Fonsibacter;s__Fonsibacter lacus	GCA_010021125.1	Subtropical	MAG	Freshwater	Lake Lanier, USA	72.69	1.48	0	30.495	654533	227	666	217.5	250.27	97.22	2.78	3	39.1073	1	0	2	0	4	8
WB6_2B_004		SAR11-IIIb.13	Allofontibacter lacus	d__Bacteria;p__Pseudomonadota;c__Alphaproteobacteria;o__Pelagibacterales;f__Pelagibacteraceae;g__Fonsibacter;s__Fonsibacter lacus	GCA_009918335.1	Subtropical	MAG	Freshwater	Lake Lanier, USA	74.99	0.6	100	29.404	682284	218	735	199	235.5	97.44	2.56	3	32.5279	1	0	0	0	0	9
N-SamH-20apr23-C70		SAR11-IIIb.13	Allofontibacter lacus	d__Bacteria;p__Pseudomonadota;c__Alphaproteobacteria;o__Pelagibacterales;f__Pelagibacteraceae;g__Fonsibacter;s__Fonsibacter lacus	GCA_965243965	Subtropical	MAG	Freshwater	Lake Samsonvale, Australia	57.83	0	0	29.613	749896	1	815	240	285.35	93.69	6.31	5	56.0878	1	1	0	1	0	27
LLD_006		SAR11-IIIb.13	Allofontibacter lacus	d__Bacteria;p__Pseudomonadota;c__Alphaproteobacteria;o__Pelagibacterales;f__Pelagibacteraceae;g__Fonsibacter;s__Fonsibacter lacus	GCA_009927895.1	Subtropical	MAG	Freshwater	Lake Lanier, USA	81.93	1.2	0	29.324	838307	255	957	196	228.75	96.43	3.57	3	41.3384	0	0	0	0	0	5
WB9_2_006		SAR11-IIIb.13	Allofontibacter lacus	d__Bacteria;p__Pseudomonadota;c__Alphaproteobacteria;o__Pelagibacterales;f__Pelagibacteraceae;g__Fonsibacter;s__Fonsibacter lacus	GCA_010027195.1	Subtropical	MAG	Freshwater	Lake Lanier, USA	77.17	2.52	66.67	29.717	815280	284	831	208	242.69	97.39	2.61	3	36.908	0	0	0	0	0	13
WBA_1B_005		SAR11-IIIb.13	Allofontibacter lacus	d__Bacteria;p__Pseudomonadota;c__Alphaproteobacteria;o__Pelagibacterales;f__Pelagibacteraceae;g__Fonsibacter;s__Fonsibacter lacus	GCA_010032115.1	Subtropical	MAG	Freshwater	Lake Lanier, USA	76.12	0	0	30.018	756293	233	795	205	247.95	97.32	2.68	4	34.2128	2	0	0	0	0	12
WB8_1A_003		SAR11-IIIb.13	Allofontibacter lacus	d__Bacteria;p__Pseudomonadota;c__Alphaproteobacteria;o__Pelagibacterales;f__Pelagibacteraceae;g__Fonsibacter;s__Fonsibacter lacus	GCA_010020745.1	Subtropical	MAG	Freshwater	Lake Lanier, USA	70.46	0.6	0	30.156	650168	255	662	207.5	236.63	97.61	2.39	4	35.4874	0	0	0	0	0	10
WB7_1C_004		SAR11-IIIb.13	Allofontibacter lacus	d__Bacteria;p__Pseudomonadota;c__Alphaproteobacteria;o__Pelagibacterales;f__Pelagibacteraceae;g__Fonsibacter;s__Fonsibacter lacus	GCA_010021135.1	Subtropical	MAG	Freshwater	Lake Lanier, USA	70.75	2.57	0	30.287	740402	246	739	218	251.35	97.17	2.83	3	39.8612	1	0	1	1	3	7
WB7_2B_003		SAR11-IIIb.13	Allofontibacter lacus	d__Bacteria;p__Pseudomonadota;c__Alphaproteobacteria;o__Pelagibacterales;f__Pelagibacteraceae;g__Fonsibacter;s__Fonsibacter lacus	GCA_010021105.1	Subtropical	MAG	Freshwater	Lake Lanier, USA	78.51	0	0	29.642	714990	226	746	206	242.39	96.71	3.29	4	43.4307	0	0	0	0	0	12
WB6_2A_004		SAR11-IIIb.13	Allofontibacter lacus	d__Bacteria;p__Pseudomonadota;c__Alphaproteobacteria;o__Pelagibacterales;f__Pelagibacteraceae;g__Fonsibacter;s__Fonsibacter lacus	GCA_009919065.1	Subtropical	MAG	Freshwater	Lake Lanier, USA	67.22	0.11	0	29.667	695545	211	743	203	240.76	97.03	2.97	4	37.2744	0	0	0	0	0	10
N-SamH-20apr23-026		SAR11-IIIb.14	Allofontibacter subtropicus	d__Bacteria;p__Pseudomonadota;c__Alphaproteobacteria;o__Pelagibacterales;f__Pelagibacteraceae;g__Fonsibacter;s__Fonsibacter sp023257975	GCA_965235415	Subtropical	MAG	Freshwater	Lake Samsonvale, Australia	98.8	1.2	100	29.294	1155633	7	1303	237	274.37	93.93	6.07	6	52.5889	1	1	1	1	1	34
N-BarE-26apr23-064		SAR11-IIIb.14	Allofontibacter subtropicus	d__Bacteria;p__Pseudomonadota;c__Alphaproteobacteria;o__Pelagibacterales;f__Pelagibacteraceae;g__Fonsibacter;s__Fonsibacter sp023257975	GCA_965235275	Subtropical	MAG	Freshwater	Lake Baroon, Australia	75.9	0	0	29.288	723258	4	786	249	286.78	94.47	5.53	6	49.7081	1	0	0	1	0	22
SRR5997543_bin_19_CONCOCT_v1_1		SAR11-IIIb.14	Allofontibacter subtropicus	d__Bacteria;p__Pseudomonadota;c__Alphaproteobacteria;o__Pelagibacterales;f__Pelagibacteraceae;g__Fonsibacter;s__Fonsibacter sp023257975	GCA_937864075.1	Subtropical	MAG	Freshwater	Urban water sample, Singapore	100	5.42	12.5	29.487	1306410	128	1380	245	282.69	96.58	3.42	5	34.6959	1	1	2	0	0	31
N-LaBr-23jan24-080		SAR11-IIIb.14	Allofontibacter subtropicus	d__Bacteria;p__Pseudomonadota;c__Alphaproteobacteria;o__Pelagibacterales;f__Pelagibacteraceae;g__Fonsibacter;s__Fonsibacter sp023257975	GCA_965236115	Subtropical	MAG	Freshwater	Laguna de Briozzo, Uruguay	89.16	0	0	28.908	1808382	5	2112	223	255.04	91.81	8.19	10	69.2493	1	1	1	1	1	26
HJW_6		SAR11-IIIb.14	Allofontibacter subtropicus	d__Bacteria;p__Pseudomonadota;c__Alphaproteobacteria;o__Pelagibacterales;f__Pelagibacteraceae;g__Fonsibacter;s__Fonsibacter sp023257975	GCA_023257975.1	Subtropical	MAG	Estuary	Estuarine open water surface layer,China	75.05	4.82	25	29.769	824516	191	912	216.5	253.88	96.34	3.66	5	40.1827	2	1	0	0	0	28
N-Balt2-05jul22-047		SAR11-IIIb.15	Allofontibacter oligotrophicus	d__Bacteria;p__Pseudomonadota;c__Alphaproteobacteria;o__Pelagibacterales;f__Pelagibacteraceae;g__Fonsibacter;s__Fonsibacter sp947497305	GCA_965235975	Temperate	MAG	Brackish	Vistula Lagoon, brackish part, Poland	96.39	0	0	29.393	923333	3	1056	230	270.57	93.51	6.49	5	55.3084	1	1	0	0	0	29
ZH-13may13-13		SAR11-IIIb.15	Allofontibacter oligotrophicus	d__Bacteria;p__Pseudomonadota;c__Alphaproteobacteria;o__Pelagibacterales;f__Pelagibacteraceae;g__Fonsibacter;s__Fonsibacter sp947497305	GCA_947497305.1	Temperate	MAG	Freshwater	Lake Zurich, Switzerland	77.11	1.81	100	29.429	734064	74	783	235	279.75	96.44	3.56	5	35.7904	0	1	0	0	0	20
ME-04may21-LR-119		SAR11-IIIb.15	Allofontibacter oligotrophicus	d__Bacteria;p__Pseudomonadota;c__Alphaproteobacteria;o__Pelagibacterales;f__Pelagibacteraceae;g__Fonsibacter;s__Fonsibacter sp947497305	GCA_965235495	Temperate	MAG	Freshwater	Lake Medard, Czechia	77.11	0	0	29.134	806184	8	961	217	260.72	94.09	5.91	6	48.8545	1	0	0	0	0	23
MsH-30jul19-279		SAR11-IIIb.15	Allofontibacter oligotrophicus	d__Bacteria;p__Pseudomonadota;c__Alphaproteobacteria;o__Pelagibacterales;f__Pelagibacteraceae;g__Fonsibacter;s__Fonsibacter sp947497305	GCA_965235205	Temperate	MAG	Freshwater	Lake Most, Czechia	59.26	0.07	100	29.366	510949	80	514	243.5	281.41	96.01	3.99	4	45.6421	0	0	1	0	1	12
MoH-23oct19-67		SAR11-IIIb.15	Allofontibacter oligotrophicus	d__Bacteria;p__Pseudomonadota;c__Alphaproteobacteria;o__Pelagibacterales;f__Pelagibacteraceae;g__Fonsibacter;s__Fonsibacter sp947497305	GCA_965235375	Temperate	MAG	Freshwater	Mondsee, Austria	53.19	0.22	50	29.259	501583	90	512	233	273.07	97.5	2.5	4	29.2163	0	1	0	0	0	8
MoE-02may19-143		SAR11-IIIb.15	Allofontibacter oligotrophicus	d__Bacteria;p__Pseudomonadota;c__Alphaproteobacteria;o__Pelagibacterales;f__Pelagibacteraceae;g__Fonsibacter;s__Fonsibacter sp947497305	GCA_965235385	Temperate	MAG	Freshwater	Mondsee, Austria	52.25	1.2	100	28.98	474102	61	498	249.5	281.65	97.27	2.73	4	28.4	0	1	0	0	0	18
MaE-04nov19-36		SAR11-IIIb.15	Allofontibacter oligotrophicus	d__Bacteria;p__Pseudomonadota;c__Alphaproteobacteria;o__Pelagibacterales;f__Pelagibacteraceae;g__Fonsibacter;s__Fonsibacter sp947497305	GCA_965235535	Temperate	MAG	Freshwater	Lake Maggiore, Italy	51.93	2.41	100	28.8	487326	96	507	223	264.95	96.4	3.6	4	41.8238	0	1	0	0	0	8
ZE-13nov19-LR-47		SAR11-IIIb.15	Allofontibacter oligotrophicus	d__Bacteria;p__Pseudomonadota;c__Alphaproteobacteria;o__Pelagibacterales;f__Pelagibacteraceae;g__Fonsibacter;s__Fonsibacter sp947497305	GCA_964203215.1	Temperate	MAG	Freshwater	Lake Zurich, Switzerland	90.96	0	0	29.734	980851	30	1160	218	259.75	94.45	5.55	6	46.9758	2	0	0	0	0	28
MsE-30jul19-LR-117		SAR11-IIIb.15	Allofontibacter oligotrophicus	d__Bacteria;p__Pseudomonadota;c__Alphaproteobacteria;o__Pelagibacterales;f__Pelagibacteraceae;g__Fonsibacter;s__Fonsibacter sp947497305	GCA_965235215	Temperate	MAG	Freshwater	Lake Most, Czechia	74.1	0	0	29.105	778122	15	887	230	272.6	94.73	5.27	5	45.6359	0	1	0	0	0	26
TE-08apr19-126		SAR11-IIIb.15	Allofontibacter oligotrophicus	d__Bacteria;p__Pseudomonadota;c__Alphaproteobacteria;o__Pelagibacterales;f__Pelagibacteraceae;g__Fonsibacter;s__Fonsibacter sp947497305	GCA_965235395	Temperate	MAG	Freshwater	Lake Thun, Switzerland	62.05	1.99	100	29.563	669066	102	710	244.5	273	96.53	3.47	4	37.1358	0	1	0	0	0	18
MoE-23oct19-200		SAR11-IIIb.15	Allofontibacter oligotrophicus	d__Bacteria;p__Pseudomonadota;c__Alphaproteobacteria;o__Pelagibacterales;f__Pelagibacteraceae;g__Fonsibacter;s__Fonsibacter sp947497305	GCA_965235195	Temperate	MAG	Freshwater	Mondsee, Austria	64.24	0.67	100	29.369	633260	94	662	245.5	277.51	97.29	2.71	4	29.5594	0	1	0	0	0	11
LE-05nov19-58		SAR11-IIIb.15	Allofontibacter oligotrophicus	d__Bacteria;p__Pseudomonadota;c__Alphaproteobacteria;o__Pelagibacterales;f__Pelagibacteraceae;g__Fonsibacter;s__Fonsibacter sp947497305	GCA_965235575	Temperate	MAG	Freshwater	Lake Lugano, Switzerland	65.07	2.03	83.33	29.264	529436	82	534	245.5	285.64	97.09	2.91	4	32.9657	0	1	0	0	0	13
ErkenSummer-bin-6361		SAR11-IIIb.15	Allofontibacter oligotrophicus	d__Bacteria;p__Pseudomonadota;c__Alphaproteobacteria;o__Pelagibacterales;f__Pelagibacteraceae;g__Fonsibacter;s__Fonsibacter sp947497305	GCA_903928535.1	Boreal Temperate	MAG	Freshwater	Lake Erken, Sweden	71.69	4.22	75	29.723	963110	290	1007	207	247.85	96.25	3.75	6	48.5027	1	1	0	2	0	18
ZE-17mar17-120		SAR11-IIIb.15	Allofontibacter oligotrophicus	d__Bacteria;p__Pseudomonadota;c__Alphaproteobacteria;o__Pelagibacterales;f__Pelagibacteraceae;g__Fonsibacter;s__Fonsibacter sp947497305	GCA_947488995.1	Temperate	MAG	Freshwater	Lake Zurich, Switzerland	71.19	1.81	100	29.119	637694	85	684	231	275.29	96.56	3.44	5	36.0197	0	0	0	0	0	10
TE-11nov19-176		SAR11-IIIb.15	Allofontibacter oligotrophicus	d__Bacteria;p__Pseudomonadota;c__Alphaproteobacteria;o__Pelagibacterales;f__Pelagibacteraceae;g__Fonsibacter;s__Fonsibacter sp947497305	GCA_965235315	Temperate	MAG	Freshwater	Lake Thun, Switzerland	63.1	1.81	50	29.629	743721	139	780	227.5	263.74	96.27	3.73	5	42.0045	2	0	0	0	0	19
MoH-02may19-18	not in tree	SAR11-IIIb.15	Allofontibacter oligotrophicus	d__Bacteria;p__Pseudomonadota;c__Alphaproteobacteria;o__Pelagibacterales;f__Pelagibacteraceae;g__Fonsibacter;s__Fonsibacter sp947497305	GCA_965235325	Temperate	MAG	Freshwater	Mondsee, Austria	45.84	0	0	28.814	432988	63	447	239	276.21	97.24	2.76	4	30.2045	1	1	0	0	0	12
MH-08apr19-64	not in tree	SAR11-IIIb.15	Allofontibacter oligotrophicus	d__Bacteria;p__Pseudomonadota;c__Alphaproteobacteria;o__Pelagibacterales;f__Pelagibacteraceae;g__Fonsibacter;s__Fonsibacter sp947497305	GCA_965235265	Temperate	MAG	Freshwater	Lake Medard, Czechia	46.23	0	0	29.058	579148	105	591	246	278.77	96.81	3.19	4	36.7078	0	0	0	0	0	16
MsH-30apr19-91	not in tree	SAR11-IIIb.15	Allofontibacter oligotrophicus	d__Bacteria;p__Pseudomonadota;c__Alphaproteobacteria;o__Pelagibacterales;f__Pelagibacteraceae;g__Fonsibacter;s__Fonsibacter sp947497305	GCA_965235365	Temperate	MAG	Freshwater	Lake Most, Czechia	41.56	1.2	100	28.902	257460	35	250	247	292.12	97.52	2.48	4	28.5491	0	1	0	0	0	9
TH-11nov19-251	not in tree	SAR11-IIIb.15	Allofontibacter oligotrophicus	d__Bacteria;p__Pseudomonadota;c__Alphaproteobacteria;o__Pelagibacterales;f__Pelagibacteraceae;g__Fonsibacter;s__Fonsibacter sp947497305	GCA_965235405	Temperate	MAG	Freshwater	Lake Thun, Switzerland	49.4	0.27	100	29.426	550977	99	567	247	274.61	97.5	2.5	4	28.3835	1	0	0	0	0	16
TrE-03may19-240	not in tree	SAR11-IIIb.15	Allofontibacter oligotrophicus	d__Bacteria;p__Pseudomonadota;c__Alphaproteobacteria;o__Pelagibacterales;f__Pelagibacteraceae;g__Fonsibacter;s__Fonsibacter sp947497305	GCA_965235185	Temperate	MAG	Freshwater	Traunsee, Austria	40.53	0	0	29.154	381698	64	386	246	282.65	96.44	3.56	5	41.0725	0	0	0	0	0	8
ZE-03apr19-113	not in tree	SAR11-IIIb.15	Allofontibacter oligotrophicus	d__Bacteria;p__Pseudomonadota;c__Alphaproteobacteria;o__Pelagibacterales;f__Pelagibacteraceae;g__Fonsibacter;s__Fonsibacter sp947497305	GCA_965235135	Temperate	MAG	Freshwater	Lake Zurich, Switzerland	49.4	2.63	75	29.161	470099	74	490	231	273.84	96.86	3.14	4	34.6549	0	0	0	0	0	9
ZE-13nov19-106	not in tree	SAR11-IIIb.15	Allofontibacter oligotrophicus	d__Bacteria;p__Pseudomonadota;c__Alphaproteobacteria;o__Pelagibacterales;f__Pelagibacteraceae;g__Fonsibacter;s__Fonsibacter sp947497305	GCA_965235435	Temperate	MAG	Freshwater	Lake Zurich, Switzerland	45.24	0	0	29.293	376026	60	378	245	281.07	97.12	2.88	4	33.2454	0	1	0	0	0	7
ZH-03apr19-302	not in tree	SAR11-IIIb.15	Allofontibacter oligotrophicus	d__Bacteria;p__Pseudomonadota;c__Alphaproteobacteria;o__Pelagibacterales;f__Pelagibacteraceae;g__Fonsibacter;s__Fonsibacter sp947497305	GCA_965235345	Temperate	MAG	Freshwater	Lake Zurich, Switzerland	46.28	0.22	100	29.499	388726	66	397	220	270.1	97.21	2.79	4	31.9382	1	0	0	0	0	8
ZH-13nov19-89	not in tree	SAR11-IIIb.15	Allofontibacter oligotrophicus	d__Bacteria;p__Pseudomonadota;c__Alphaproteobacteria;o__Pelagibacterales;f__Pelagibacteraceae;g__Fonsibacter;s__Fonsibacter sp947497305	GCA_965235445	Temperate	MAG	Freshwater	Lake Zurich, Switzerland	50.72	1.2	100	29.14	348134	59	341	250	288.15	96.96	3.04	4	36.7847	0	0	0	0	0	5
N-Mw14-23nov23-026		SAR11-IIIb.16	Allofontibacter communis	d__Bacteria;p__Pseudomonadota;c__Alphaproteobacteria;o__Pelagibacterales;f__Pelagibacteraceae;g__Fonsibacter;s__Fonsibacter sp016882185	GCA_965235775	Tropical	MAG	Freshwater	Lake Malawi, Malawi	89.09	0	0	28.849	1187221	17	1293	251	283.04	93.81	6.19	6	55.6937	1	1	1	1	1	24
N-Mw13-23nov23-045		SAR11-IIIb.16	Allofontibacter communis	d__Bacteria;p__Pseudomonadota;c__Alphaproteobacteria;o__Pelagibacterales;f__Pelagibacteraceae;g__Fonsibacter;s__Fonsibacter sp016882185	GCA_965236135	Tropical	MAG	Freshwater	Lake Malawi, Malawi	97.59	0	0	29.618	872740	7	1005	230	270.78	94.64	5.36	6	45.52	1	1	0	0	0	29
N-Mw1-16nov23-028		SAR11-IIIb.16	Allofontibacter communis	d__Bacteria;p__Pseudomonadota;c__Alphaproteobacteria;o__Pelagibacterales;f__Pelagibacteraceae;g__Fonsibacter;s__Fonsibacter sp016882185	GCA_965235685	Tropical	MAG	Freshwater	Lake Malawi, Malawi	98.72	0	0	28.769	1152139	2	1234	258.5	290.88	94.36	5.64	6	51.209	1	1	0	1	0	30
N-Mw8-13nov23-022		SAR11-IIIb.16	Allofontibacter communis	d__Bacteria;p__Pseudomonadota;c__Alphaproteobacteria;o__Pelagibacterales;f__Pelagibacteraceae;g__Fonsibacter;s__Fonsibacter sp016882185	GCA_965235795	Tropical	MAG	Freshwater	Lake Malawi, Malawi	88.48	1.31	0	28.814	1237763	11	1605	190	229.9	90.57	9.43	18	71.4214	2	2	1	1	1	31
K_Offshore_40m_m1_069		SAR11-IIIb.16	Allofontibacter communis	d__Bacteria;p__Pseudomonadota;c__Alphaproteobacteria;o__Pelagibacterales;f__Pelagibacteraceae;g__Fonsibacter;s__Fonsibacter sp016882185	GCA_016882185.1	Tropical	MAG	Freshwater	Lake Tanganyika, Tanzania	77.71	3.34	83.33	29.517	920163	155	983	233	265.65	96.43	3.57	4	38.2937	1	1	1	0	1	27
N-Mw5-13nov23-050		SAR11-IIIb.16	Allofontibacter communis	d__Bacteria;p__Pseudomonadota;c__Alphaproteobacteria;o__Pelagibacterales;f__Pelagibacteraceae;g__Fonsibacter;s__Fonsibacter sp016882185	GCA_965235845	Tropical	MAG	Freshwater	Lake Malawi, Malawi	68.17	3.61	66.67	29.635	993807	11	1175	225	263.41	94.37	5.63	6	46.9622	1	1	2	1	1	21
N-Mw1-16nov23-079		SAR11-IIIb.16	Allofontibacter communis	d__Bacteria;p__Pseudomonadota;c__Alphaproteobacteria;o__Pelagibacterales;f__Pelagibacteraceae;g__Fonsibacter;s__Fonsibacter sp016882185	GCA_965235825	Tropical	MAG	Freshwater	Lake Malawi, Malawi	81.86	0	0	29.403	1019789	3	1165	238	275.16	94.9	5.1	6	43.5771	1	1	1	0	1	22
N-Mw2-16nov23-073		SAR11-IIIb.16	Allofontibacter communis	d__Bacteria;p__Pseudomonadota;c__Alphaproteobacteria;o__Pelagibacterales;f__Pelagibacteraceae;g__Fonsibacter;s__Fonsibacter sp016882185	GCA_965236015	Tropical	MAG	Freshwater	Lake Malawi, Malawi	96.31	0	0	29.659	1042717	7	1221	233	267.11	94.71	5.29	6	44.3524	1	2	1	1	1	31
N-Mw6-13nov23-029		SAR11-IIIb.16	Allofontibacter communis	d__Bacteria;p__Pseudomonadota;c__Alphaproteobacteria;o__Pelagibacterales;f__Pelagibacteraceae;g__Fonsibacter;s__Fonsibacter sp016882185	GCA_965236075	Tropical	MAG	Freshwater	Lake Malawi, Malawi	90.29	0	0	28.485	1213277	16	1322	249	282.81	93.58	6.42	8	57.459	1	1	1	0	1	32
N-Mw9-20nov23-034		SAR11-IIIb.16	Allofontibacter communis	d__Bacteria;p__Pseudomonadota;c__Alphaproteobacteria;o__Pelagibacterales;f__Pelagibacteraceae;g__Fonsibacter;s__Fonsibacter sp016882185	GCA_965236155	Tropical	MAG	Freshwater	Lake Malawi, Malawi	92.1	0.6	100	28.644	1189176	10	1382	229.5	263.81	92.84	7.16	9	60.2369	1	1	1	1	1	31
N-Mw13-23nov23-098		SAR11-IIIb.16	Allofontibacter communis	d__Bacteria;p__Pseudomonadota;c__Alphaproteobacteria;o__Pelagibacterales;f__Pelagibacteraceae;g__Fonsibacter;s__Fonsibacter sp016882185	GCA_965235755	Tropical	MAG	Freshwater	Lake Malawi, Malawi	71.01	2.41	100	29.706	995170	6	1166	231.5	267.77	94.99	5.01	5	41.9352	2	1	3	1	3	29
N-Mw5-13nov23-012		SAR11-IIIb.16	Allofontibacter communis	d__Bacteria;p__Pseudomonadota;c__Alphaproteobacteria;o__Pelagibacterales;f__Pelagibacteraceae;g__Fonsibacter;s__Fonsibacter sp016882185	GCA_965235725	Tropical	MAG	Freshwater	Lake Malawi, Malawi	80.65	0	0	28.694	1154941	6	1244	257	289.71	94.5	5.5	6	49.7375	1	1	0	0	0	26
N-Mw11-20nov23-012		SAR11-IIIb.16	Allofontibacter communis	d__Bacteria;p__Pseudomonadota;c__Alphaproteobacteria;o__Pelagibacterales;f__Pelagibacteraceae;g__Fonsibacter;s__Fonsibacter sp016882185	GCA_965236105	Tropical	MAG	Freshwater	Lake Malawi, Malawi	83.06	0	0	29.018	531262	4	601	240	274.95	93.76	6.24	5	54.0653	0	1	0	0	0	24
N-Mw15-23nov23-C63		SAR11-IIIb.16	Allofontibacter communis	d__Bacteria;p__Pseudomonadota;c__Alphaproteobacteria;o__Pelagibacterales;f__Pelagibacteraceae;g__Fonsibacter;s__Fonsibacter sp016882185	GCA_965244865	Tropical	MAG	Freshwater	Lake Malawi, Malawi	52.83	0	0	29.74	987004	1	1201	218	253.11	93.72	6.28	6	51.1625	2	1	0	0	0	10
N-Mw10-20nov23-C54		SAR11-IIIb.16	Allofontibacter communis	d__Bacteria;p__Pseudomonadota;c__Alphaproteobacteria;o__Pelagibacterales;f__Pelagibacteraceae;g__Fonsibacter;s__Fonsibacter sp016882185	GCA_965244035	Tropical	MAG	Freshwater	Lake Malawi, Malawi	54.72	0	0	29.896	1072876	1	1274	219	254.92	92.68	7.32	7	60.7773	1	1	0	0	0	12
LSUCC0530		SAR11-IIIb.16	Allofontibacter communis	d__Bacteria;p__Pseudomonadota;c__Alphaproteobacteria;o__Pelagibacterales;f__Pelagibacteraceae;g__Fonsibacter;s__Fonsibacter ubiquis	GCA_002688585.1	Subtropical	Isolate	Brackish	Lake Borgne, USA	100	0	0	29.024	1160202	1	1231	263	300.4	96.07	3.93	5	36.1314	1	1	1	1	1	32
N-BiE-22sep22-058		SAR11-IIIb.16	Allofontibacter communis	d__Bacteria;p__Pseudomonadota;c__Alphaproteobacteria;o__Pelagibacterales;f__Pelagibacteraceae;g__Fonsibacter;s__Fonsibacter ubiquis	GCA_965236005	Subtropical	MAG	Freshwater	Lake Biwa, Japan	98.19	2.41	100	29.425	1431776	15	1679	216	255.53	91.65	8.35	8	69.9485	1	1	2	2	2	37
N-IMU-22jan24-062		SAR11-IIIb.16	Allofontibacter communis	d__Bacteria;p__Pseudomonadota;c__Alphaproteobacteria;o__Pelagibacterales;f__Pelagibacteraceae;g__Fonsibacter;s__Fonsibacter ubiquis	GCA_965235585	Subtropical	MAG	Freshwater	Represa de India Muerta, Uruguay	97.59	0	0	29.27	1078822	4	1279	221	258.45	92.8	7.2	6	59.5602	1	1	0	1	0	30
N-SamH-20apr23-066		SAR11-IIIb.16	Allofontibacter communis	d__Bacteria;p__Pseudomonadota;c__Alphaproteobacteria;o__Pelagibacterales;f__Pelagibacteraceae;g__Fonsibacter;s__Fonsibacter ubiquis	GCA_965235145	Subtropical	MAG	Freshwater	Lake Samsonvale, Australia	98.8	0	0	29.399	1055253	5	1176	239.5	280.18	94.29	5.71	6	50.1982	1	1	0	0	0	29
3300014957-4		SAR11-IIIb.16	Allofontibacter communis	d__Bacteria;p__Pseudomonadota;c__Alphaproteobacteria;o__Pelagibacterales;f__Pelagibacteraceae;g__Fonsibacter;s__Fonsibacter ubiquis	_	Subtropical	MAG	Freshwater	Drinking water treatment plant, Nanjing, China	93.98	1.2	100	29.78	948153	97	989	247	287.87	96.47	3.53	5	36.2167	1	1	1	1	1	30
3300014029-2		SAR11-IIIb.16	Allofontibacter communis	d__Bacteria;p__Pseudomonadota;c__Alphaproteobacteria;o__Pelagibacterales;f__Pelagibacteraceae;g__Fonsibacter;s__Fonsibacter ubiquis	_	Subtropical	MAG	Freshwater	Drinking water treatment plant, Pearl River Delta, China	86.14	0	0	30.046	902124	107	934	243	283.08	96.64	3.36	5	35.4019	1	1	1	0	1	29
3300011984-2		SAR11-IIIb.16	Allofontibacter communis	d__Bacteria;p__Pseudomonadota;c__Alphaproteobacteria;o__Pelagibacterales;f__Pelagibacteraceae;g__Fonsibacter;s__Fonsibacter ubiquis	_	Subtropical	MAG	Freshwater	Drinking water treatment plant, China	86.14	0	0	30.021	900819	106	932	244	283.55	96.57	3.43	5	36.1743	1	1	1	0	1	29
N-MdE-27apr23-011		SAR11-IIIb.16	Allofontibacter communis	d__Bacteria;p__Pseudomonadota;c__Alphaproteobacteria;o__Pelagibacterales;f__Pelagibacteraceae;g__Fonsibacter;s__Fonsibacter ubiquis	GCA_965235255	Subtropical	MAG	Freshwater	Lake Monduran, Australia	92.77	0	0	31.277	789290	6	882	247	280.8	95.02	4.98	7	44.4203	0	3	0	0	0	30
N-ChE-26sep22-010		SAR11-IIIb.16	Allofontibacter communis	d__Bacteria;p__Pseudomonadota;c__Alphaproteobacteria;o__Pelagibacterales;f__Pelagibacteraceae;g__Fonsibacter;s__Fonsibacter ubiquis	GCA_965235595	Humid Temperate	MAG	Freshwater	Lake Chuzenji, Japan	95.78	0	0	29.453	506577	5	576	239.5	274.42	94.41	5.59	7	48.4743	0	0	0	0	0	29
N-BarE-26apr23-045		SAR11-IIIb.16	Allofontibacter communis	d__Bacteria;p__Pseudomonadota;c__Alphaproteobacteria;o__Pelagibacterales;f__Pelagibacteraceae;g__Fonsibacter;s__Fonsibacter ubiquis	GCA_965235165	Subtropical	MAG	Freshwater	Lake Baroon, Australia	96.39	2.41	100	29.463	1117003	8	1303	224	267.79	94.35	5.65	5	47.6649	1	1	0	0	0	29
N-LaBr-23jan24-C92		SAR11-IIIb.16	Allofontibacter communis	d__Bacteria;p__Pseudomonadota;c__Alphaproteobacteria;o__Pelagibacterales;f__Pelagibacteraceae;g__Fonsibacter;s__Fonsibacter ubiquis	GCA_965244565	Subtropical	MAG	Freshwater	Laguna de Briozzo, Uruguay	72.29	0	0	29.372	791794	1	848	256	294.63	95.72	4.28	6	38.9048	1	1	0	0	0	26
BS14		SAR11-IIIb.16	Allofontibacter communis	d__Bacteria;p__Pseudomonadota;c__Alphaproteobacteria;o__Pelagibacterales;f__Pelagibacteraceae;g__Fonsibacter;s__Fonsibacter ubiquis	GCA_003569325.1	Subtropical	MAG	Freshwater	Lake Biwa, Japan	88.55	0	0	29.374	902418	6	1072	213.5	261.11	93.8	6.2	7	51.0849	1	1	0	0	0	28
N-SamE-20apr23-052		SAR11-IIIb.16	Allofontibacter communis	d__Bacteria;p__Pseudomonadota;c__Alphaproteobacteria;o__Pelagibacterales;f__Pelagibacteraceae;g__Fonsibacter;s__Fonsibacter ubiquis	GCA_965235155	Subtropical	MAG	Freshwater	Lake Samsonvale, Australia	90.36	0	0	29.296	952249	7	1054	247	286.62	95.96	4.04	5	35.7363	1	1	0	0	0	30
LBMAG_Alphaproteobacteria_epi.bin1_LD12		SAR11-IIIb.16	Allofontibacter communis	d__Bacteria;p__Pseudomonadota;c__Alphaproteobacteria;o__Pelagibacterales;f__Pelagibacteraceae;g__Fonsibacter;s__Fonsibacter ubiquis	GCA_014190315.1	Subtropical	MAG	Freshwater	Lake Biwa, Japan	79.92	0	0	29.427	731335	66	745	254	294.76	97.06	2.94	4	30.5625	1	1	0	0	0	24
UBA4760		SAR11-IIIb.16	Allofontibacter communis	d__Bacteria;p__Pseudomonadota;c__Alphaproteobacteria;o__Pelagibacterales;f__Pelagibacteraceae;g__Fonsibacter;s__Fonsibacter ubiquis	GCA_002403525.1	Subtropical	MAG	Freshwater	Drinking water, China	75.58	0.11	100	28.299	821333	104	810	224	264.49	89.7	10.3	6	115.844	1	1	0	0	0	24
LaPlata-5m-b-bin-419		SAR11-IIIb.16	Allofontibacter communis	d__Bacteria;p__Pseudomonadota;c__Alphaproteobacteria;o__Pelagibacterales;f__Pelagibacteraceae;g__Fonsibacter;s__Fonsibacter ubiquis	GCA_903839115.1	Subtropical	MAG	Freshwater	Lake La Plata, Puerto Rico	69.13	0.14	100	29.778	750942	269	792	188.5	226.65	95.97	4.03	6	53.7074	1	0	0	0	0	31
WBA_1A_001		SAR11-IIIb.16	Allofontibacter communis	d__Bacteria;p__Pseudomonadota;c__Alphaproteobacteria;o__Pelagibacterales;f__Pelagibacteraceae;g__Fonsibacter;s__Fonsibacter ubiquis	GCA_010026375.1	Subtropical	MAG	Freshwater	Lake Lanier, USA	82.44	0	0	29.328	765004	200	801	220	256.81	96.99	3.01	4	36.6858	1	1	0	0	0	21
WB9_1A_001		SAR11-IIIb.16	Allofontibacter communis	d__Bacteria;p__Pseudomonadota;c__Alphaproteobacteria;o__Pelagibacterales;f__Pelagibacteraceae;g__Fonsibacter;s__Fonsibacter ubiquis	GCA_010026465.1	Subtropical	MAG	Freshwater	Lake Lanier, USA	86.44	0	0	29.372	770794	196	807	212	256.98	96.78	3.22	4	39.3233	1	1	0	0	1	14
WB7_2xD_001		SAR11-IIIb.16	Allofontibacter communis	d__Bacteria;p__Pseudomonadota;c__Alphaproteobacteria;o__Pelagibacterales;f__Pelagibacteraceae;g__Fonsibacter;s__Fonsibacter ubiquis	GCA_010020815.1	Subtropical	MAG	Freshwater	Lake Lanier, USA	80.51	0	0	29.104	740832	208	839	197	233.43	96.44	3.56	5	40.1905	0	1	0	0	0	19
WB7_2xC_001		SAR11-IIIb.16	Allofontibacter communis	d__Bacteria;p__Pseudomonadota;c__Alphaproteobacteria;o__Pelagibacterales;f__Pelagibacteraceae;g__Fonsibacter;s__Fonsibacter ubiquis	GCA_010024335.1	Subtropical	MAG	Freshwater	Lake Lanier, USA	83.81	0.11	0	29.462	757206	198	854	194	234.01	95.95	4.05	5	44.458	2	1	2	0	2	24
WBA_1B_001		SAR11-IIIb.16	Allofontibacter communis	d__Bacteria;p__Pseudomonadota;c__Alphaproteobacteria;o__Pelagibacterales;f__Pelagibacteraceae;g__Fonsibacter;s__Fonsibacter ubiquis	GCA_010028665.1	Subtropical	MAG	Freshwater	Lake Lanier, USA	86.22	1.25	0	29.582	778045	192	823	210	252.86	96.7	3.3	4	39.1985	1	1	0	0	2	17
WB7_2xJ_001		SAR11-IIIb.16	Allofontibacter communis	d__Bacteria;p__Pseudomonadota;c__Alphaproteobacteria;o__Pelagibacterales;f__Pelagibacteraceae;g__Fonsibacter;s__Fonsibacter ubiquis	GCA_010020885.1	Subtropical	MAG	Freshwater	Lake Lanier, USA	82.71	0	0	29.45	752210	195	843	199	237.77	96.06	3.94	5	43.1968	1	1	1	0	2	23
WB7_2xM_001		SAR11-IIIb.16	Allofontibacter communis	d__Bacteria;p__Pseudomonadota;c__Alphaproteobacteria;o__Pelagibacterales;f__Pelagibacteraceae;g__Fonsibacter;s__Fonsibacter ubiquis	GCA_010020995.1	Subtropical	MAG	Freshwater	Lake Lanier, USA	79.03	0	0	29.264	732056	170	845	194	235.33	96.4	3.6	5	37.2444	1	1	0	0	0	22
WB7_2xK_001		SAR11-IIIb.16	Allofontibacter communis	d__Bacteria;p__Pseudomonadota;c__Alphaproteobacteria;o__Pelagibacterales;f__Pelagibacteraceae;g__Fonsibacter;s__Fonsibacter ubiquis	GCA_010020755.1	Subtropical	MAG	Freshwater	Lake Lanier, USA	77.31	0	0	29.305	760832	198	857	195	237.49	96.29	3.71	5	40.67	1	1	0	0	2	21
LH-05nov19-97		SAR11-IIIb.16	Allofontibacter communis	d__Bacteria;p__Pseudomonadota;c__Alphaproteobacteria;o__Pelagibacterales;f__Pelagibacteraceae;g__Fonsibacter;s__Fonsibacter ubiquis	GCA_965235545	Temperate	MAG	Freshwater	Lake Lugano, Switzerland	50	0	0	29.023	458784	64	499	223	269.43	96.81	3.19	4	32.6406	0	1	0	0	0	13
WB9_1B_001		SAR11-IIIb.16	Allofontibacter communis	d__Bacteria;p__Pseudomonadota;c__Alphaproteobacteria;o__Pelagibacterales;f__Pelagibacteraceae;g__Fonsibacter;s__Fonsibacter ubiquis	GCA_010026855.1	Subtropical	MAG	Freshwater	Lake Lanier, USA	85.43	0.44	0	29.37	771194	188	822	209.5	255.3	96.82	3.18	4	37.2049	1	1	0	0	0	14
WB7_2xL_001		SAR11-IIIb.16	Allofontibacter communis	d__Bacteria;p__Pseudomonadota;c__Alphaproteobacteria;o__Pelagibacterales;f__Pelagibacteraceae;g__Fonsibacter;s__Fonsibacter ubiquis	GCA_010020905.1	Subtropical	MAG	Freshwater	Lake Lanier, USA	82.86	0	0	29.155	710397	186	811	197	232.07	96.25	3.75	5	41.1327	1	1	2	0	0	17
WBB_3_001		SAR11-IIIb.16	Allofontibacter communis	d__Bacteria;p__Pseudomonadota;c__Alphaproteobacteria;o__Pelagibacterales;f__Pelagibacteraceae;g__Fonsibacter;s__Fonsibacter ubiquis	GCA_010030565.1	Subtropical	MAG	Freshwater	Lake Lanier, USA	76.4	1.2	0	30.264	641047	203	672	186.5	237.98	96.71	3.29	5	41.7366	1	0	0	0	1	18
LaPlata-5m-a-bin-100		SAR11-IIIb.16	Allofontibacter communis	d__Bacteria;p__Pseudomonadota;c__Alphaproteobacteria;o__Pelagibacterales;f__Pelagibacteraceae;g__Fonsibacter;s__Fonsibacter ubiquis	GCA_903823395.1	Subtropical	MAG	Freshwater	Lake La Plata, Puerto Rico	65.44	0.85	100	29.526	635481	235	649	205	239.23	97	3	5	42.9414	0	1	0	0	0	21
WB7_2xN_001		SAR11-IIIb.16	Allofontibacter communis	d__Bacteria;p__Pseudomonadota;c__Alphaproteobacteria;o__Pelagibacterales;f__Pelagibacteraceae;g__Fonsibacter;s__Fonsibacter ubiquis	GCA_010021025.1	Subtropical	MAG	Freshwater	Lake Lanier, USA	74.08	0	0	29.219	747152	188	841	199	236.58	96.6	3.4	5	37.193	1	1	0	0	2	16
WB7_2xF_001		SAR11-IIIb.16	Allofontibacter communis	d__Bacteria;p__Pseudomonadota;c__Alphaproteobacteria;o__Pelagibacterales;f__Pelagibacteraceae;g__Fonsibacter;s__Fonsibacter ubiquis	GCA_010021065.1	Subtropical	MAG	Freshwater	Lake Lanier, USA	83.02	1.2	100	29.455	726175	196	805	194	235.04	96.17	3.83	5	43.3697	1	1	1	0	5	18
LE-05nov19-195		SAR11-IIIb.16	Allofontibacter communis	d__Bacteria;p__Pseudomonadota;c__Alphaproteobacteria;o__Pelagibacterales;f__Pelagibacteraceae;g__Fonsibacter;s__Fonsibacter ubiquis	GCA_964201085.1	Temperate	MAG	Freshwater	Lake Lugano, Switzerland	67.63	0.11	0	29.102	556602	67	573	244	282.91	97.14	2.86	4	30.5885	0	1	0	0	0	14
WB7_2xI_001		SAR11-IIIb.16	Allofontibacter communis	d__Bacteria;p__Pseudomonadota;c__Alphaproteobacteria;o__Pelagibacterales;f__Pelagibacteraceae;g__Fonsibacter;s__Fonsibacter ubiquis	GCA_010020785.1	Subtropical	MAG	Freshwater	Lake Lanier, USA	79.9	0	0	29.221	750783	188	845	201	235.6	96.46	3.54	5	38.4855	1	1	1	0	0	20
WB7_2xE_001		SAR11-IIIb.16	Allofontibacter communis	d__Bacteria;p__Pseudomonadota;c__Alphaproteobacteria;o__Pelagibacterales;f__Pelagibacteraceae;g__Fonsibacter;s__Fonsibacter ubiquis	GCA_010020985.1	Subtropical	MAG	Freshwater	Lake Lanier, USA	82.4	0.4	0	29.321	776751	202	886	190	233	96.49	3.51	5	38.1566	1	1	1	0	3	21
WB7_2xH_001		SAR11-IIIb.16	Allofontibacter communis	d__Bacteria;p__Pseudomonadota;c__Alphaproteobacteria;o__Pelagibacterales;f__Pelagibacteraceae;g__Fonsibacter;s__Fonsibacter ubiquis	GCA_010021035.1	Subtropical	MAG	Freshwater	Lake Lanier, USA	84.05	0.66	22.22	29.29	769717	204	869	192	232.34	95.92	4.08	5	45.1004	1	1	1	0	3	18
WB7_2xA_001		SAR11-IIIb.16	Allofontibacter communis	d__Bacteria;p__Pseudomonadota;c__Alphaproteobacteria;o__Pelagibacterales;f__Pelagibacteraceae;g__Fonsibacter;s__Fonsibacter ubiquis	GCA_010020955.1	Subtropical	MAG	Freshwater	Lake Lanier, USA	75.26	0	0	29.255	778720	200	873	193	235	96.62	3.38	5	37.0324	1	1	2	0	2	21
WB8_2A_001		SAR11-IIIb.16	Allofontibacter communis	d__Bacteria;p__Pseudomonadota;c__Alphaproteobacteria;o__Pelagibacterales;f__Pelagibacteraceae;g__Fonsibacter;s__Fonsibacter ubiquis	GCA_010020665.1	Subtropical	MAG	Freshwater	Lake Lanier, USA	78.61	0.6	100	29.097	692635	180	724	215	256.54	97.51	2.49	5	30.1909	0	1	0	0	0	14
WB7_2xB_001		SAR11-IIIb.16	Allofontibacter communis	d__Bacteria;p__Pseudomonadota;c__Alphaproteobacteria;o__Pelagibacterales;f__Pelagibacteraceae;g__Fonsibacter;s__Fonsibacter ubiquis	GCA_010020895.1	Subtropical	MAG	Freshwater	Lake Lanier, USA	77.18	0.11	100	29.295	778732	204	897	187	231.2	95.81	4.19	5	45.105	1	1	0	0	1	20
WB8_2B_001		SAR11-IIIb.16	Allofontibacter communis	d__Bacteria;p__Pseudomonadota;c__Alphaproteobacteria;o__Pelagibacterales;f__Pelagibacteraceae;g__Fonsibacter;s__Fonsibacter ubiquis	GCA_010020675.1	Subtropical	MAG	Freshwater	Lake Lanier, USA	73.81	1.04	20	29.157	723903	196	771	211	248.17	97.11	2.89	5	34.6689	1	1	1	0	1	17
WB7_2xG_001		SAR11-IIIb.16	Allofontibacter communis	d__Bacteria;p__Pseudomonadota;c__Alphaproteobacteria;o__Pelagibacterales;f__Pelagibacteraceae;g__Fonsibacter;s__Fonsibacter ubiquis	GCA_010020945.1	Subtropical	MAG	Freshwater	Lake Lanier, USA	84.54	0	0	29.435	739538	191	834	196	234.07	96.12	3.88	5	42.6039	2	1	2	0	1	19
LaPlata-7m-a-bin-268		SAR11-IIIb.16	Allofontibacter communis	d__Bacteria;p__Pseudomonadota;c__Alphaproteobacteria;o__Pelagibacterales;f__Pelagibacteraceae;g__Fonsibacter;s__Fonsibacter ubiquis	GCA_903840565.1	Subtropical	MAG	Freshwater	Lake La Plata, Puerto Rico	66.39	4.36	60	30.08	706482	259	740	189.5	227.6	95.96	4.04	4	56.0314	2	1	1	0	0	20
LE-02apr19-277	not in tree	SAR11-IIIb.16	Allofontibacter communis	d__Bacteria;p__Pseudomonadota;c__Alphaproteobacteria;o__Pelagibacterales;f__Pelagibacteraceae;g__Fonsibacter;s__Fonsibacter ubiquis	GCA_965235475	Temperate	MAG	Freshwater	Lake Lugano, Switzerland	40.74	2.41	50	28.951	391160	60	412	233	275.96	97.28	2.72	5	29.3619	0	1	0	0	0	11
LH-02apr19-190	not in tree	SAR11-IIIb.16	Allofontibacter communis	d__Bacteria;p__Pseudomonadota;c__Alphaproteobacteria;o__Pelagibacterales;f__Pelagibacteraceae;g__Fonsibacter;s__Fonsibacter ubiquis	GCA_965235355	Temperate	MAG	Freshwater	Lake Lugano, Switzerland	47.36	1.2	100	28.76	389416	61	403	239	271.98	97.3	2.7	4	29.5718	0	1	0	0	0	13
MaE-04nov19-320	not in tree	SAR11-IIIb.16	Allofontibacter communis	d__Bacteria;p__Pseudomonadota;c__Alphaproteobacteria;o__Pelagibacterales;f__Pelagibacteraceae;g__Fonsibacter;s__Fonsibacter ubiquis	GCA_965235465	Temperate	MAG	Freshwater	Lake Maggiore, Italy	46.99	4.89	80	29.559	492229	72	525	233	276.1	97.49	2.51	5	26.8649	1	1	0	0	0	6
N-BiH-22sep22-C130	not in tree	SAR11-IIIb.16	Allofontibacter communis	d__Bacteria;p__Pseudomonadota;c__Alphaproteobacteria;o__Pelagibacterales;f__Pelagibacteraceae;g__Fonsibacter;s__Fonsibacter ubiquis	GCA_965244555	Subtropical	MAG	Freshwater	Lake Biwa, Japan	52.83	0	0	29.471	1296107	1	1547	219	256.18	92.9	7.1	8	58.2766	1	1	0	0	0	9
N-LaNe-23jan24-002	not in tree	SAR11-IIIb.16	Allofontibacter communis	d__Bacteria;p__Pseudomonadota;c__Alphaproteobacteria;o__Pelagibacterales;f__Pelagibacteraceae;g__Fonsibacter;s__	GCA_965235625	Subtropical	MAG	Freshwater	Laguna Negra, Uruguay	67.85	1.2	100	30.271	974455	25	1206	206	245.63	92.19	7.81	9	61.6861	2	2	1	0	1	27
SAG-MED32	outgroup	SAR11-IV		d__Bacteria;p__Pseudomonadota;c__Alphaproteobacteria;o__Pelagibacterales;f__AG-422-B15;g__AG-422-B15;s__AG-422-B15 sp014653725	GCA_014653725.1	Mediterranean	SAG	Marine	Mediterranean Sea	71.01	0.07	0	32.965	760207	71	793	265	289.47	96.18	3.82	6	38.9464	2	0	1	1	1	18
HIMB59	outgroup	SAR11-IV		d__Bacteria;p__Pseudomonadota;c__Alphaproteobacteria;o__HIMB59;f__HIMB59;g__HIMB59;s__HIMB59 sp000299115	GCA_000299115.1	Tropical	Isolate	Marine	USA: Kaneohe Bay; Hawaii	95.78	0	0	32.263	1410127	1	1490	279	303.19	96.52	3.48	4	32.229	3	1	1	1	1	35
SP337	outgroup	SAR11-IV		d__Bacteria;p__Pseudomonadota;c__Alphaproteobacteria;o__HIMB59;f__GCA-002718135;g__GCA-2717485;s__GCA-2717485 sp002717485	GCA_002717485.1	Mediterranean	MAG	Marine	Mediterranean Sea	89.16	0	0	29.481	1404973	24	1432	285	310.83	96.56	3.44	9	33.4585	2	1	0	2	1	38
SAG-MED31	outgroup	SAR11-IV		d__Bacteria;p__Pseudomonadota;c__Alphaproteobacteria;o__HIMB59;f__GCA-002718135;g__AG-337-I02;s__AG-337-I02 sp014653715	GCA_014653715.1	Mediterranean	SAG	Marine	Mediterranean Sea	65.22	1.35	0	29.682	940639	61	972	272.5	299.05	96.68	3.32	4	33.8212	3	1	0	0	0	10

## Sheet: S3_TIGR
Table S3: List of TIGRFAMs used for phylogenomic tree reconstruction
	# of TIGRs/genome	664	663	706	726	672	528	494	523	484	455	444	670	536	682	544	563	728	591	700	747	637	697	658	630	685	747	503	742	672	732	738	695	720	495	630	639	530	526	751	751	751	751	751	751	751	751	702	751
	% of TIGRs/genome	88.4154	88.2823	94.008	96.6711	89.4807	70.3063	65.779	69.6405	64.4474	60.5859	59.1212	89.2144	71.3715	90.8123	72.4368	74.9667	96.9374	78.6951	93.2091	99.4674	84.8202	92.8096	87.6165	83.8881	91.2117	99.4674	66.9774	98.8016	89.4807	97.47	98.269	92.5433	95.8722	65.9121	83.8881	85.0866	70.5726	70.0399	100	100	100	100	100	100	100	100	93.4754	100
TIGR	Description	3300011984-2	3300014029-2	3300014957-4	3300020262_24	3300026931-2	3300027147-14	3300027149-15	3300027150-18	3300027211-13	3300027224-14	3300027563-31	3300027685-46	3300027688-45	3300027749-48	3300027756-64	3300027940-3	3300027976-91	3300027983-82	AG-313-A04	AG-426-E17	AG-426-G02	AG-430-E20	AG-470-G21	AG-918-P15	AH-24oct19-262	AM1_bin-0028	AM2-bin-0866	AM_bin-3698	BACL5_MAG-120820-bin39	Baikal-deep-G36	Baikal-deep-G37	Baikal-G1	BS14	cas-150m-16	cas-150m-34	cas-50m-154	cas-50m-174	ErkenSummer-bin-6361	Fonsibacter_30-26	ME-17	ME-18	ME-20	ME-31	ME-33	MiE-29	MK-138	GOM-A1	HIMB083
TIGR00001	TIGR00001: rpmI_bact: ribosomal protein L35	1	1	1	1	1	1	1	1	1	1	1	1	1	1	1	1	0	0	1	1	1	1	1	1	1	1	1	1	1	1	1	1	1	1	1	1	1	0	1	1	1	1	1	1	1	1	1	1
TIGR00004	TIGR00004: TIGR00004: putative endoribonuclease L-PSP	1	1	1	1	0	0	0	0	0	0	0	1	0	1	0	1	1	0	1	1	1	1	1	0	0	0	0	0	1	1	1	1	1	1	1	0	1	1	1	1	1	1	1	1	1	1	1	1
TIGR00005	TIGR00005: rluA_subfam: pseudouridine synthase, RluA family	1	1	1	1	1	0	1	1	1	1	0	1	1	1	0	1	1	1	1	1	1	1	1	1	1	1	1	1	1	1	1	1	1	1	1	1	1	0	1	1	1	1	1	1	1	1	1	1
TIGR00006	TIGR00006: TIGR00006: S-adenosyl-methyltransferase MraW	1	1	1	1	1	1	1	1	1	1	0	1	1	1	1	1	1	1	1	1	0	1	0	1	1	1	0	1	1	1	1	1	0	0	0	1	0	1	1	1	1	1	1	1	1	1	1	1
TIGR00012	TIGR00012: L29: ribosomal protein L29	1	1	1	1	1	1	1	1	1	1	1	1	1	1	1	1	1	1	1	1	0	1	1	1	1	1	0	1	0	1	1	1	1	1	1	1	1	0	1	1	1	1	1	1	1	1	1	1
TIGR00019	TIGR00019: prfA: peptide chain release factor 1	1	1	1	1	1	1	1	1	0	0	1	1	1	1	1	0	1	1	1	1	1	1	1	1	1	1	1	1	1	1	1	1	1	1	1	1	1	1	1	1	1	1	1	1	1	1	1	1
TIGR00020	TIGR00020: prfB: peptide chain release factor 2	1	1	1	1	1	1	1	1	0	0	1	1	1	1	1	0	1	1	1	1	1	1	1	1	1	1	1	1	1	1	1	1	1	1	1	1	1	1	1	1	1	1	1	1	1	1	1	1
TIGR00023	TIGR00023: TIGR00023: acyl-phosphate glycerol 3-phosphate acyltransferase	1	1	1	1	1	0	1	0	0	1	1	1	1	1	1	1	1	1	1	1	1	1	1	0	1	1	0	1	1	1	1	1	1	1	1	1	1	1	1	1	1	1	1	1	1	1	1	1
TIGR00029	TIGR00029: S20: ribosomal protein S20	1	1	1	1	1	1	1	1	0	1	1	1	1	1	1	1	1	0	0	1	1	1	1	1	1	1	1	1	1	0	1	1	1	0	1	1	1	1	1	1	1	1	1	1	1	1	1	1
TIGR00032	TIGR00032: argG: argininosuccinate synthase	1	1	1	1	1	1	0	0	1	0	0	0	1	1	0	0	1	1	1	1	1	1	1	1	1	1	0	1	1	1	1	1	1	0	0	1	1	1	1	1	1	1	1	1	1	1	1	1
TIGR00033	TIGR00033: aroC: chorismate synthase	1	1	1	1	1	0	0	0	1	0	0	1	0	1	0	0	1	1	1	1	1	1	1	1	1	1	1	1	1	1	1	1	1	1	0	1	1	1	1	1	1	1	1	1	1	1	1	1
TIGR00041	TIGR00041: DTMP_kinase: thymidylate kinase	0	0	1	1	1	0	0	0	0	0	0	0	0	1	1	0	1	1	1	1	1	1	0	0	0	1	0	1	0	1	1	1	1	1	1	1	0	0	1	1	1	1	1	1	1	1	0	1
TIGR00043	TIGR00043: TIGR00043: metalloprotein, YbeY/UPF0054 family	0	0	1	1	1	1	1	0	1	0	0	1	0	1	1	1	1	1	1	1	1	1	1	1	1	1	0	1	1	1	1	1	0	1	0	1	1	0	1	1	1	1	1	1	1	1	1	1
TIGR00046	TIGR00046: TIGR00046: RNA methyltransferase, RsmE family	1	1	1	1	1	1	0	0	0	0	0	1	0	1	0	1	1	1	1	1	1	1	1	1	1	1	0	1	1	1	1	1	1	1	1	0	1	1	1	1	1	1	1	1	1	1	1	1
TIGR00049	TIGR00049: TIGR00049: iron-sulfur cluster assembly accessory protein	1	1	1	1	1	1	1	0	0	1	0	1	1	1	1	0	1	1	1	1	1	1	1	1	1	1	1	1	1	1	1	1	1	1	1	1	1	1	1	1	1	1	1	1	1	1	1	1
TIGR00051	TIGR00051: TIGR00051: acyl-CoA thioester hydrolase, YbgC/YbaW family	1	1	1	1	1	1	1	1	1	0	1	0	0	1	1	1	1	1	0	1	1	1	0	1	0	1	1	1	1	1	1	1	1	1	1	1	0	1	1	1	1	1	1	1	1	1	1	1
TIGR00054	TIGR00054: TIGR00054: RIP metalloprotease RseP	0	0	1	1	1	1	0	0	0	0	0	1	0	1	1	1	1	0	1	1	1	1	1	1	1	1	0	1	1	1	1	1	1	0	0	1	0	0	1	1	1	1	1	1	1	1	1	1
TIGR00057	TIGR00057: TIGR00057: Sua5/YciO/YrdC/YwlC family protein	1	1	1	1	1	0	0	0	0	0	0	1	0	1	0	0	1	1	1	1	0	1	1	1	1	1	0	1	1	1	1	1	1	1	1	1	1	0	1	1	1	1	1	1	1	1	1	1
TIGR00059	TIGR00059: L17: ribosomal protein L17	1	1	1	1	1	0	1	1	1	1	1	1	1	1	1	0	1	1	1	1	1	1	1	0	0	1	0	1	1	1	1	0	1	1	1	1	1	1	1	1	1	1	1	1	1	1	1	1
TIGR00060	TIGR00060: L18_bact: ribosomal protein L18	1	1	1	1	1	0	0	1	1	1	1	1	1	1	1	1	1	1	1	1	1	1	1	1	1	1	1	1	1	1	1	0	1	0	1	1	0	1	1	1	1	1	1	1	1	1	1	1
TIGR00061	TIGR00061: L21: ribosomal protein L21	1	1	1	1	0	1	1	1	1	1	1	1	0	0	1	1	1	0	1	1	0	1	1	1	1	1	1	1	1	1	1	1	1	1	1	1	0	1	1	1	1	1	1	1	1	1	1	1
TIGR00062	TIGR00062: L27: ribosomal protein L27	1	1	1	1	0	1	1	1	1	1	1	1	0	0	1	1	1	0	1	1	0	1	1	1	1	1	1	1	1	1	1	1	1	1	1	1	0	1	1	1	1	1	1	1	1	1	1	1
TIGR00063	TIGR00063: folE: GTP cyclohydrolase I	0	0	1	1	1	0	0	0	0	0	0	1	0	1	0	0	1	0	1	1	1	1	1	1	1	1	1	1	1	1	1	1	1	0	0	1	1	1	1	1	1	1	1	1	1	1	1	1
TIGR00064	TIGR00064: ftsY: signal recognition particle-docking protein FtsY	1	1	1	0	1	1	1	1	1	1	1	1	1	1	1	1	1	1	1	1	1	1	1	1	1	1	1	1	1	1	1	1	1	1	1	1	1	1	1	1	1	1	1	1	1	1	1	1
TIGR00065	TIGR00065: ftsZ: cell division protein FtsZ	1	1	1	1	1	1	1	1	0	1	1	0	1	1	1	1	1	1	1	1	1	1	0	1	1	1	0	1	1	1	1	1	1	0	0	1	0	1	1	1	1	1	1	1	1	1	1	1
TIGR00069	TIGR00069: hisD: histidinol dehydrogenase	1	1	1	1	1	1	1	1	1	1	1	1	1	0	1	1	1	1	1	1	1	1	1	1	1	1	1	1	1	1	1	1	1	0	0	1	1	0	1	1	1	1	1	1	1	1	1	1
TIGR00071	TIGR00071: hisT_truA: tRNA pseudouridine(38-40) synthase	1	1	1	1	0	1	0	1	0	0	0	1	0	1	1	1	1	1	1	1	1	1	1	1	1	1	0	1	1	1	1	1	1	0	1	1	1	0	1	1	1	1	1	1	1	1	1	1
TIGR00077	TIGR00077: lspA: signal peptidase II	0	0	0	1	1	0	0	1	1	1	1	1	0	1	1	0	1	1	1	1	1	1	1	1	1	1	0	1	1	1	1	1	1	1	1	1	0	0	1	1	1	1	1	1	1	1	1	1
TIGR00078	TIGR00078: nadC: nicotinate-nucleotide diphosphorylase (carboxylating)	1	1	1	1	1	1	0	0	1	0	0	1	0	0	1	0	1	1	1	1	1	0	1	0	1	1	0	1	1	1	1	1	1	1	1	1	0	1	1	1	1	1	1	1	1	1	1	1
TIGR00079	TIGR00079: pept_deformyl: peptide deformylase	1	1	1	1	0	1	1	1	1	1	1	1	1	1	1	1	1	1	1	1	1	1	1	0	1	1	1	1	1	1	1	1	1	0	1	1	1	1	1	1	1	1	1	1	1	1	1	1
TIGR00081	TIGR00081: purC: phosphoribosylaminoimidazolesuccinocarboxamide synthase	0	0	1	1	1	1	1	1	1	1	1	1	1	1	1	1	1	0	0	1	1	1	1	0	0	1	1	1	1	1	1	1	1	0	0	0	1	1	1	1	1	1	1	1	1	1	1	1
TIGR00082	TIGR00082: rbfA: ribosome-binding factor A	1	1	1	1	1	1	0	1	0	0	1	1	1	1	1	1	1	0	1	1	1	1	1	1	1	1	1	1	1	1	1	1	1	0	1	1	1	0	1	1	1	1	1	1	1	1	1	1
TIGR00083	TIGR00083: ribF: riboflavin biosynthesis protein RibF	0	0	0	1	1	1	1	0	1	0	1	1	0	1	1	1	1	1	1	1	0	1	1	1	1	1	1	1	1	1	1	1	1	1	1	1	0	0	1	1	1	1	1	1	1	1	1	1
TIGR00086	TIGR00086: smpB: SsrA-binding protein	1	1	0	1	1	0	1	0	0	0	0	1	0	1	1	0	1	1	0	1	1	0	0	1	0	1	0	1	1	1	1	1	1	0	1	1	1	1	1	1	1	1	1	1	1	1	1	1
TIGR00088	TIGR00088: trmD: tRNA (guanine(37)-N(1))-methyltransferase	1	1	1	1	1	1	1	1	1	1	1	1	1	1	1	1	1	0	1	1	1	1	1	1	1	1	1	1	1	1	1	1	1	1	1	1	1	1	1	1	1	1	1	1	1	1	1	1
TIGR00089	TIGR00089: TIGR00089: radical SAM methylthiotransferase, MiaB/RimO family	1	1	1	1	1	0	0	1	0	0	0	1	0	1	1	1	1	1	1	1	1	1	1	1	1	1	1	1	1	1	1	1	1	1	1	1	1	1	1	1	1	1	1	1	1	1	1	1
TIGR00090	TIGR00090: iojap_ybeB: iojap-like ribosome-associated protein	1	1	1	1	0	1	1	1	1	1	0	1	0	1	0	1	1	1	1	1	0	0	1	1	1	1	1	1	1	1	1	1	1	0	1	1	1	1	1	1	1	1	1	1	1	1	1	1
TIGR00092	TIGR00092: TIGR00092: GTP-binding protein YchF	1	1	1	1	1	1	1	1	1	1	1	1	1	0	1	1	1	1	1	1	1	1	1	1	1	1	1	1	0	1	1	1	1	1	1	1	1	1	1	1	1	1	1	1	1	1	1	1
TIGR00095	TIGR00095: TIGR00095: RNA methyltransferase, RsmD family	0	0	1	1	1	0	0	1	1	1	0	1	1	1	1	0	1	0	1	1	1	1	1	1	1	1	0	1	1	1	1	1	1	1	1	1	0	0	1	1	1	1	1	1	1	1	1	1
TIGR00097	TIGR00097: HMP-P_kinase: phosphomethylpyrimidine kinase	1	1	1	1	1	1	0	0	1	0	1	1	1	1	0	1	1	0	1	1	1	1	1	1	1	1	1	1	1	1	1	1	1	1	1	1	0	1	1	1	1	1	1	1	1	1	1	1
TIGR00103	TIGR00103: DNA_YbaB_EbfC: DNA-binding protein, YbaB/EbfC family	1	1	1	1	0	1	1	1	1	1	1	1	1	1	1	1	1	1	1	1	1	1	1	1	1	1	1	1	1	1	1	1	1	1	1	1	1	1	1	1	1	1	1	1	1	1	1	1
TIGR00109	TIGR00109: hemH: ferrochelatase	1	1	1	1	1	0	0	0	0	0	0	1	0	1	1	0	1	0	1	1	1	1	1	1	1	1	1	1	1	1	1	1	0	0	1	1	0	1	1	1	1	1	1	1	1	1	1	1
TIGR00110	TIGR00110: ilvD: dihydroxy-acid dehydratase	1	1	1	1	1	0	0	1	1	0	1	1	1	1	1	0	1	1	0	1	1	1	1	1	1	1	1	1	1	1	1	1	1	1	1	1	1	1	1	1	1	1	1	1	1	1	0	1
TIGR00112	TIGR00112: proC: pyrroline-5-carboxylate reductase	1	1	1	1	1	1	1	1	1	1	0	0	0	1	1	0	0	0	1	1	0	1	0	0	1	1	1	1	1	1	1	1	1	0	1	1	1	1	1	1	1	1	1	1	1	1	1	1
TIGR00114	TIGR00114: lumazine-synth: 6,7-dimethyl-8-ribityllumazine synthase	1	1	1	1	1	0	1	0	0	0	0	1	1	1	1	1	1	1	1	1	1	0	0	0	1	1	1	1	1	1	0	0	1	0	1	1	0	0	1	1	1	1	1	1	1	1	0	1
TIGR00120	TIGR00120: ArgJ: glutamate N-acetyltransferase/amino-acid acetyltransferase	1	1	1	1	1	1	1	0	1	0	1	1	1	1	1	1	0	0	1	1	1	1	1	1	1	1	1	1	1	1	1	1	1	1	0	1	0	1	1	1	1	1	1	1	1	1	1	1
TIGR00127	TIGR00127: nadp_idh_euk: isocitrate dehydrogenase, NADP-dependent	1	1	1	1	1	0	0	1	0	1	0	1	0	1	0	1	1	1	1	1	1	1	1	1	1	1	0	1	1	1	1	1	1	0	0	1	0	1	1	1	1	1	1	1	1	1	1	1
TIGR00128	TIGR00128: fabD: malonyl CoA-acyl carrier protein transacylase	1	1	1	1	1	0	0	0	0	0	0	1	1	1	0	0	1	1	1	1	0	1	1	0	1	1	1	1	1	1	1	1	1	0	1	1	1	0	1	1	1	1	1	1	1	1	1	1
TIGR00132	TIGR00132: gatA: aspartyl/glutamyl-tRNA(Asn/Gln) amidotransferase, A subunit	1	1	1	1	1	1	1	1	1	0	1	1	1	1	1	1	1	1	1	1	1	1	1	1	1	1	1	1	1	1	1	1	1	1	1	1	1	1	1	1	1	1	1	1	1	1	1	1
TIGR00133	TIGR00133: gatB: aspartyl/glutamyl-tRNA(Asn/Gln) amidotransferase, B subunit	0	0	1	1	1	0	0	0	0	0	0	1	0	1	0	1	1	1	1	1	1	1	1	1	1	1	0	1	0	0	1	1	1	1	0	1	0	0	1	1	1	1	1	1	1	1	1	1
TIGR00135	TIGR00135: gatC: aspartyl/glutamyl-tRNA(Asn/Gln) amidotransferase, C subunit	1	1	1	1	1	1	0	0	0	0	0	1	1	1	1	1	1	1	1	1	1	1	1	1	1	1	0	1	1	1	1	1	1	1	0	1	1	1	1	1	1	1	1	1	1	1	1	1
TIGR00150	TIGR00150: HI0065_YjeE: ATPase, YjeE family	0	0	1	1	1	1	1	1	1	1	0	1	1	1	1	1	1	1	1	1	1	1	1	1	1	1	0	1	1	1	1	1	1	1	1	1	0	1	1	1	1	1	1	1	1	1	1	1
TIGR00152	TIGR00152: TIGR00152: dephospho-CoA kinase	1	1	1	1	1	1	1	1	1	1	1	1	1	1	1	0	1	1	1	1	1	1	1	0	1	1	0	1	1	1	1	1	0	0	1	0	0	0	1	1	1	1	1	1	1	1	1	1
TIGR00154	TIGR00154: ispE: 4-(cytidine 5'-diphospho)-2-C-methyl-D-erythritol kinase	1	1	1	1	1	1	1	0	1	1	0	1	0	1	1	1	1	1	1	0	1	1	1	1	1	1	0	0	1	1	1	0	1	1	1	1	0	0	1	1	1	1	1	1	1	1	0	1
TIGR00158	TIGR00158: L9: ribosomal protein L9	1	1	1	1	1	0	1	0	0	1	0	1	1	1	1	1	1	1	1	1	0	1	1	0	1	1	0	1	1	1	1	1	1	0	1	0	1	1	1	1	1	1	1	1	1	1	1	1
TIGR00164	TIGR00164: PS_decarb_rel: phosphatidylserine decarboxylase homolog	0	0	1	1	0	0	0	0	0	1	0	1	0	1	0	1	1	1	1	1	1	1	1	0	1	1	0	1	1	1	1	1	1	0	0	1	0	0	1	1	1	1	1	1	1	1	1	1
TIGR00165	TIGR00165: S18: ribosomal protein S18	1	1	1	1	1	0	1	0	0	1	0	1	1	1	1	1	1	1	1	1	0	1	1	0	1	1	0	1	1	1	1	1	1	0	1	1	1	1	1	1	1	1	1	1	1	1	1	1
TIGR00166	TIGR00166: S6: ribosomal protein S6	1	1	1	1	1	0	1	0	0	1	0	1	1	1	1	1	1	1	1	1	0	1	1	0	1	1	1	1	1	1	1	1	1	0	1	1	1	1	1	1	1	1	1	1	1	1	1	1
TIGR00169	TIGR00169: leuB: 3-isopropylmalate dehydrogenase	0	0	1	1	1	1	1	0	1	1	1	1	1	0	1	1	1	1	1	1	1	1	1	1	1	1	1	1	1	1	1	1	1	0	1	1	1	1	1	1	1	1	1	1	1	1	1	1
TIGR00170	TIGR00170: leuC: 3-isopropylmalate dehydratase, large subunit	1	1	1	1	1	1	1	1	1	1	1	1	1	1	0	1	1	1	1	1	1	1	1	1	1	1	1	1	1	1	1	1	1	0	1	1	1	0	1	1	1	1	1	1	1	1	1	1
TIGR00171	TIGR00171: leuD: 3-isopropylmalate dehydratase, small subunit	1	1	0	1	1	1	1	1	1	1	1	1	1	1	1	1	1	1	1	1	1	1	1	1	1	1	1	1	0	1	1	1	1	0	1	1	1	0	1	1	1	1	1	1	1	1	1	1
TIGR00172	TIGR00172: maf: septum formation protein Maf	1	1	1	1	1	1	1	1	1	1	1	1	1	1	1	0	1	1	1	1	1	1	1	1	1	1	1	1	1	1	1	1	1	0	1	0	0	1	1	1	1	1	1	1	1	1	1	1
TIGR00174	TIGR00174: miaA: tRNA dimethylallyltransferase	0	0	0	1	1	0	0	1	0	0	0	1	0	1	1	1	1	1	1	1	1	1	1	1	1	1	0	1	1	1	1	1	1	1	0	1	1	0	1	1	1	1	1	1	1	1	1	1
TIGR00175	TIGR00175: mito_nad_idh: isocitrate dehydrogenase, NAD-dependent	0	0	1	1	1	1	1	0	1	1	1	1	1	0	1	1	1	1	1	1	1	1	1	1	1	1	1	1	1	1	1	1	1	0	1	1	1	1	1	1	1	1	1	1	1	1	1	1
TIGR00177	TIGR00177: molyb_syn: molybdenum cofactor synthesis domain	1	1	1	1	1	1	1	1	1	1	1	1	1	1	1	1	1	1	0	1	1	1	0	1	1	1	1	1	1	1	1	1	1	1	1	0	1	0	1	1	1	1	1	1	1	1	1	1
TIGR00179	TIGR00179: murB: UDP-N-acetylenolpyruvoylglucosamine reductase	1	1	1	1	1	1	0	0	0	0	1	1	1	1	1	1	1	1	1	1	0	1	1	1	1	1	1	1	1	1	1	1	1	1	1	1	0	1	1	1	1	1	1	1	1	1	1	1
TIGR00182	TIGR00182: plsX: fatty acid/phospholipid synthesis protein PlsX	1	1	1	1	1	1	1	1	1	0	0	1	0	1	1	0	1	1	1	1	1	0	0	1	1	1	0	1	1	1	1	0	1	1	0	1	1	1	1	1	1	1	1	1	1	1	0	1
TIGR00184	TIGR00184: purA: adenylosuccinate synthase	1	1	1	1	1	1	0	1	1	0	1	1	1	0	0	1	1	0	1	1	1	1	1	1	1	1	1	1	1	1	1	1	1	1	1	1	1	0	1	1	1	1	1	1	1	1	1	1
TIGR00185	TIGR00185: tRNA_yibK_trmL: tRNA (cytidine(34)-2'-O)-methyltransferase	1	1	1	1	1	1	1	1	1	1	1	1	1	1	1	1	1	1	1	1	1	1	1	1	1	1	1	1	1	1	1	1	1	1	1	1	1	1	1	1	1	1	1	1	1	1	1	1
TIGR00186	TIGR00186: rRNA_methyl_3: RNA methyltransferase, TrmH family, group 3	1	1	1	1	1	1	1	1	1	1	1	1	1	1	1	1	1	1	1	1	1	1	1	1	1	1	1	1	1	1	1	1	1	1	1	1	1	1	1	1	1	1	1	1	1	1	1	1
TIGR00187	TIGR00187: ribE: riboflavin synthase, alpha subunit	1	1	1	1	1	1	1	0	0	0	0	1	0	1	1	0	1	0	1	1	1	0	0	0	1	1	0	1	1	1	1	0	1	0	1	1	0	0	1	1	1	1	1	1	1	1	0	1
TIGR00188	TIGR00188: rnpA: ribonuclease P protein component	1	1	1	1	0	0	1	1	0	1	1	1	1	1	1	1	1	1	1	1	1	1	1	1	1	1	1	1	1	1	1	1	1	1	1	1	1	0	1	1	1	1	1	1	1	1	1	1
TIGR00194	TIGR00194: uvrC: excinuclease ABC subunit C	1	1	1	1	1	1	1	1	1	1	0	0	1	1	1	1	1	1	1	1	0	1	1	1	1	1	0	1	1	1	1	1	1	0	1	1	1	1	1	1	1	1	1	1	1	1	1	1
TIGR00195	TIGR00195: exoDNase_III: exodeoxyribonuclease III	1	1	1	1	1	1	1	0	1	1	0	1	1	1	1	0	1	1	0	1	1	1	1	0	1	1	0	1	0	1	1	1	1	1	1	1	1	1	1	1	1	1	1	1	1	1	1	1
TIGR00199	TIGR00199: cinA_cterm: competence/damage-inducible protein CinA C-terminal domain	0	0	0	1	1	1	1	1	1	1	1	1	1	1	1	0	1	1	1	1	1	1	1	1	1	1	0	1	1	1	1	1	1	1	1	1	0	1	1	1	1	1	1	1	1	1	0	1
TIGR00211	TIGR00211: glyS: glycine--tRNA ligase, beta subunit	1	1	1	1	1	1	1	1	1	1	0	1	1	0	0	1	1	0	1	1	1	1	1	1	1	1	0	1	1	1	1	1	1	1	0	1	1	0	1	1	1	1	1	1	1	1	1	1
TIGR00214	TIGR00214: lipB: lipoyl(octanoyl) transferase	0	0	1	1	1	0	1	0	0	1	0	1	0	1	0	0	1	1	1	1	1	1	1	0	0	1	0	1	0	1	1	0	1	1	0	1	1	0	1	1	1	1	1	1	1	1	1	1
TIGR00215	TIGR00215: lpxB: lipid-A-disaccharide synthase	0	0	1	1	1	1	0	0	0	1	0	1	0	1	1	0	1	1	1	1	1	1	1	1	1	1	0	0	1	1	1	1	1	0	0	1	1	0	1	1	1	1	1	1	1	1	1	1
TIGR00216	TIGR00216: ispH_lytB: 4-hydroxy-3-methylbut-2-enyl diphosphate reductase	0	0	1	1	1	1	1	1	1	1	0	1	1	0	0	1	1	0	1	1	0	1	1	1	1	1	1	1	1	1	1	1	1	0	1	1	0	1	1	1	1	1	1	1	1	1	1	1
TIGR00219	TIGR00219: mreC: rod shape-determining protein MreC	1	1	1	1	1	1	1	1	1	1	1	1	1	1	0	0	1	1	1	1	1	0	1	1	1	1	1	1	1	1	1	1	1	0	1	1	1	0	1	1	1	1	1	1	1	1	1	1
TIGR00222	TIGR00222: panB: 3-methyl-2-oxobutanoate hydroxymethyltransferase	0	0	1	1	1	0	0	0	0	0	0	1	0	1	0	1	1	1	1	1	1	1	0	0	1	1	0	1	1	1	1	1	0	0	1	1	1	1	1	1	1	1	1	1	1	1	0	1
TIGR00225	TIGR00225: prc: C-terminal processing peptidase	1	1	1	1	0	1	1	1	1	1	0	1	0	1	0	1	1	1	1	1	0	1	1	1	1	1	1	1	1	1	1	1	1	0	1	1	1	1	1	1	1	1	1	1	1	1	1	1
TIGR00230	TIGR00230: sfsA: sugar fermentation stimulation protein	1	1	1	1	1	1	1	1	1	1	1	1	1	1	1	1	1	0	0	1	1	1	1	0	1	1	1	1	1	1	1	1	1	0	0	0	1	0	1	1	1	1	1	1	1	1	1	1
TIGR00232	TIGR00232: tktlase_bact: transketolase	1	1	1	1	1	1	1	1	1	0	1	1	1	1	0	1	1	1	0	1	1	1	1	1	1	1	0	1	1	1	0	0	1	1	1	1	1	1	1	1	1	1	1	1	1	1	0	1
TIGR00233	TIGR00233: trpS: tryptophan--tRNA ligase	1	1	1	1	1	1	1	1	0	1	1	1	1	1	1	0	1	1	1	1	1	1	1	1	1	1	1	1	1	1	1	1	1	1	1	1	0	1	1	1	1	1	1	1	1	1	1	1
TIGR00234	TIGR00234: tyrS: tyrosine--tRNA ligase	1	1	1	1	1	0	0	1	0	0	1	1	1	1	1	0	1	1	1	1	1	1	1	1	0	1	1	1	1	1	1	1	1	1	1	0	0	1	1	1	1	1	1	1	1	1	1	1
TIGR00239	TIGR00239: 2oxo_dh_E1: oxoglutarate dehydrogenase (succinyl-transferring), E1 component	0	0	1	1	1	0	0	0	1	1	1	1	1	1	1	1	1	1	1	1	0	1	1	1	1	1	1	1	1	1	1	1	1	0	1	1	0	1	1	1	1	1	1	1	1	1	1	1
TIGR00242	TIGR00242: TIGR00242: protein MraZ	1	1	1	1	1	1	1	1	0	1	1	0	1	1	1	1	1	1	1	1	0	1	1	1	1	1	1	1	1	1	1	1	1	0	1	1	0	0	1	1	1	1	1	1	1	1	1	1
TIGR00244	TIGR00244: TIGR00244: transcriptional regulator NrdR	1	1	1	1	1	0	0	1	0	0	0	1	1	1	1	0	1	0	1	1	1	0	0	0	1	1	0	1	1	1	1	1	1	1	1	0	0	0	1	1	1	1	1	1	1	1	1	1
TIGR00250	TIGR00250: RNAse_H_YqgF: RNAse H domain protein, YqgF family	1	1	1	1	1	1	1	0	0	0	1	1	1	1	1	1	1	1	1	1	1	1	1	1	1	1	1	1	1	1	1	1	1	1	0	1	1	1	1	1	1	1	1	1	1	1	1	1
TIGR00260	TIGR00260: thrC: threonine synthase	0	0	1	1	1	1	0	1	1	1	1	1	0	0	1	1	1	0	1	1	1	1	1	1	1	1	0	1	1	1	1	1	1	1	1	1	1	1	1	1	1	1	1	1	1	1	1	1
TIGR00278	TIGR00278: TIGR00278: conserved hypothetical protein YidD	1	1	1	1	0	0	1	1	0	1	1	1	1	1	1	1	1	1	1	1	1	1	1	1	1	1	0	1	1	1	1	1	1	1	1	1	1	0	1	1	1	1	1	1	1	1	1	1
TIGR00281	TIGR00281: TIGR00281: segregation and condensation protein B	1	1	1	1	1	1	0	0	0	0	0	1	0	1	0	0	1	1	1	1	0	1	1	1	0	1	1	1	1	1	1	1	1	1	1	1	1	1	1	1	1	1	1	1	1	1	1	1
TIGR00282	TIGR00282: TIGR00282: metallophosphoesterase, MG_246/BB_0505 family	1	1	1	1	1	1	1	1	1	1	1	1	0	1	1	1	1	1	1	1	1	1	1	1	1	1	1	1	1	1	1	1	1	1	1	1	1	1	1	1	1	1	1	1	1	1	1	1
TIGR00302	TIGR00302: TIGR00302: phosphoribosylformylglycinamidine synthase, purS protein	1	1	1	0	1	1	1	1	1	1	1	1	1	1	1	1	1	0	0	1	1	1	0	0	0	1	1	1	1	1	1	1	0	0	0	0	1	0	1	1	1	1	1	1	1	1	1	1
TIGR00321	TIGR00321: dhys: deoxyhypusine synthase	1	1	1	1	1	1	0	0	0	1	1	1	1	1	1	1	1	1	1	1	1	1	0	1	1	1	0	1	1	1	1	1	1	1	1	1	1	1	1	1	1	1	1	1	1	1	1	1
TIGR00325	TIGR00325: lpxC: UDP-3-O-3-hydroxymyristoyl N-acetylglucosamine deacetylase	1	1	1	1	1	0	1	0	0	0	1	1	1	1	1	1	1	1	1	1	1	1	1	1	1	0	0	0	1	1	1	1	1	1	1	1	0	1	1	1	1	1	1	1	1	1	1	1
TIGR00326	TIGR00326: eubact_ribD: riboflavin biosynthesis protein RibD	0	0	1	1	1	0	0	0	0	0	0	1	0	1	0	0	1	0	1	0	1	0	0	0	1	1	0	1	1	1	1	0	1	1	1	0	0	0	1	1	1	1	1	1	1	1	0	1
TIGR00330	TIGR00330: glpX: fructose-1,6-bisphosphatase, class II	1	1	1	1	1	0	0	0	0	0	0	1	0	0	0	0	1	0	1	1	1	1	1	1	1	1	1	1	0	1	1	1	1	0	1	1	0	1	1	1	1	1	1	1	1	1	0	1
TIGR00336	TIGR00336: pyrE: orotate phosphoribosyltransferase	1	1	1	1	1	0	0	0	0	0	1	1	1	1	1	0	1	1	1	1	1	1	0	1	1	1	0	1	1	1	1	1	1	1	1	1	1	1	1	1	1	1	1	1	1	1	1	1
TIGR00337	TIGR00337: PyrG: CTP synthase	1	1	1	1	1	0	0	0	0	0	0	1	0	1	1	1	1	1	1	1	1	1	1	1	1	1	1	1	0	1	1	1	1	1	1	1	0	0	1	1	1	1	1	1	1	1	1	1
TIGR00344	TIGR00344: alaS: alanine--tRNA ligase	1	1	1	1	1	0	0	1	0	1	0	1	1	1	1	1	1	1	1	1	1	1	1	1	1	1	0	1	1	1	1	1	1	0	0	1	0	1	1	1	1	1	1	1	1	1	0	1
TIGR00353	TIGR00353: nrfE: cytochrome c-type biogenesis protein CcmF	1	1	1	1	1	1	1	1	1	1	1	1	1	1	1	0	1	1	1	1	1	0	1	0	1	1	0	1	1	1	1	1	1	0	0	1	0	1	1	1	1	1	1	1	1	1	1	1
TIGR00357	TIGR00357: TIGR00357: methionine-R-sulfoxide reductase	1	1	1	1	1	1	1	0	0	0	1	0	1	1	1	0	1	1	1	1	1	1	1	1	0	1	1	1	1	1	1	1	1	0	0	0	1	1	1	1	1	1	1	1	1	1	1	1
TIGR00362	TIGR00362: DnaA: chromosomal replication initiator protein DnaA	1	1	1	1	1	0	0	0	0	0	1	1	1	1	0	1	1	0	0	1	1	1	1	1	1	1	0	1	1	1	1	1	1	1	1	1	1	1	1	1	1	1	1	1	1	1	1	1
TIGR00365	TIGR00365: TIGR00365: monothiol glutaredoxin, Grx4 family	1	1	1	1	1	1	1	1	1	1	1	1	1	1	1	1	1	0	1	1	1	1	0	1	1	1	1	1	1	1	1	1	1	0	0	1	1	1	1	1	1	1	1	1	1	1	1	1
TIGR00382	TIGR00382: clpX: ATP-dependent Clp protease, ATP-binding subunit ClpX	1	1	1	1	1	0	0	1	0	1	0	1	1	1	1	0	1	0	1	1	1	1	0	1	1	1	1	1	1	1	1	1	1	0	1	1	1	1	1	1	1	1	1	1	1	1	1	1
TIGR00384	TIGR00384: dhsB: succinate dehydrogenase and fumarate reductase iron-sulfur protein	1	1	1	1	1	1	1	1	1	1	1	1	1	1	1	1	1	1	1	1	1	1	1	1	1	1	1	1	1	1	1	1	1	1	1	1	1	1	1	1	1	1	1	1	1	1	1	1
TIGR00385	TIGR00385: dsbE: periplasmic protein thiol:disulfide oxidoreductases, DsbE subfamily	1	1	1	1	1	1	1	1	1	1	1	1	1	1	1	1	1	1	1	1	1	1	1	1	1	1	1	1	1	1	1	1	1	0	1	1	0	1	1	1	1	1	1	1	1	1	1	1
TIGR00387	TIGR00387: glcD: glycolate oxidase, subunit GlcD	1	1	1	1	1	1	1	1	1	1	1	1	1	1	1	1	1	1	1	1	1	0	1	1	1	1	1	1	1	1	1	1	1	1	0	1	1	1	1	1	1	1	1	1	1	1	1	1
TIGR00392	TIGR00392: ileS: isoleucine--tRNA ligase	1	1	1	1	1	0	1	1	1	0	1	1	1	1	1	0	1	1	1	1	1	1	1	1	1	1	0	1	1	1	1	1	1	1	1	1	1	0	1	1	1	1	1	1	1	1	1	1
TIGR00393	TIGR00393: kpsF: sugar isomerase, KpsF/GutQ family	0	0	1	1	1	0	1	0	1	0	0	1	0	1	1	1	1	1	0	1	0	1	1	0	1	1	1	1	1	1	1	1	1	0	0	1	1	1	1	1	1	1	1	1	1	1	1	1
TIGR00400	TIGR00400: mgtE: magnesium transporter	0	0	1	1	1	0	1	0	0	0	0	1	0	1	1	1	1	1	1	1	1	1	1	0	1	1	1	1	1	1	1	0	1	1	0	1	1	0	1	1	1	1	1	1	1	1	1	1
TIGR00401	TIGR00401: msrA: peptide-methionine (S)-S-oxide reductase	1	1	1	1	1	1	1	0	0	1	1	1	1	1	1	1	0	1	1	1	1	1	1	1	1	1	1	1	1	1	1	1	1	1	0	1	0	1	1	1	1	1	1	1	1	1	1	1
TIGR00407	TIGR00407: proA: glutamate-5-semialdehyde dehydrogenase	1	1	1	1	0	1	1	1	1	1	0	1	0	1	0	1	1	0	1	1	0	1	1	1	1	1	0	1	1	1	1	1	1	1	1	1	1	1	1	1	1	1	1	1	1	1	1	1
TIGR00414	TIGR00414: serS: serine--tRNA ligase	1	1	1	1	1	1	1	1	1	1	0	1	1	1	1	1	1	1	1	1	1	1	1	1	1	1	1	1	0	0	1	1	1	1	1	1	1	0	1	1	1	1	1	1	1	1	1	1
TIGR00418	TIGR00418: thrS: threonine--tRNA ligase	1	1	1	1	1	1	1	1	1	1	1	1	1	1	1	1	1	0	1	1	1	1	1	1	0	1	0	1	1	1	1	1	1	1	1	1	1	0	1	1	1	1	1	1	1	1	1	1
TIGR00419	TIGR00419: tim: triose-phosphate isomerase	1	1	1	1	1	0	1	0	0	0	0	1	0	1	1	1	1	1	1	1	1	1	1	1	1	1	0	1	1	1	1	1	0	1	1	1	0	0	1	1	1	1	1	1	1	1	1	1
TIGR00420	TIGR00420: trmU: tRNA (5-methylaminomethyl-2-thiouridylate)-methyltransferase	1	1	1	1	1	0	0	0	0	0	0	1	0	1	0	0	0	0	1	1	1	1	1	1	1	1	0	1	1	1	1	1	1	1	0	1	0	1	1	1	1	1	1	1	1	1	1	1
TIGR00422	TIGR00422: valS: valine--tRNA ligase	1	1	1	1	1	0	1	1	1	0	1	1	1	1	1	0	1	1	1	1	1	1	1	1	1	1	0	1	1	1	1	1	1	1	1	1	1	0	1	1	1	1	1	1	1	1	1	1
TIGR00435	TIGR00435: cysS: cysteine--tRNA ligase	1	1	0	1	1	1	1	1	1	1	0	1	1	1	0	1	1	0	1	1	1	1	0	0	0	1	1	1	0	1	1	1	1	1	0	1	1	0	1	1	1	1	1	1	1	1	1	1
TIGR00438	TIGR00438: rrmJ: ribosomal RNA large subunit methyltransferase J	0	0	0	1	0	0	0	1	0	1	0	0	0	1	0	0	1	1	1	1	1	1	1	0	1	1	0	1	1	1	1	1	1	0	0	1	0	0	1	1	1	1	1	1	1	1	1	1
TIGR00443	TIGR00443: hisZ_biosyn_reg: ATP phosphoribosyltransferase, regulatory subunit	1	1	1	1	1	1	1	0	0	1	1	0	1	0	1	0	1	1	1	1	1	1	1	1	1	1	0	1	1	1	1	1	1	0	0	1	1	0	1	1	1	1	1	1	1	1	1	1
TIGR00445	TIGR00445: mraY: phospho-N-acetylmuramoyl-pentapeptide-transferase	1	1	1	1	1	0	0	1	1	0	0	1	1	1	1	1	1	1	1	1	1	1	1	1	1	1	0	1	1	1	1	1	1	0	0	1	0	1	1	1	1	1	1	1	1	1	1	1
TIGR00447	TIGR00447: pth: peptidyl-tRNA hydrolase	1	1	1	1	1	1	1	1	1	1	1	1	1	0	1	1	1	1	1	1	1	1	1	1	1	1	1	1	1	1	1	1	1	1	1	1	1	1	1	1	1	1	1	1	1	1	1	1
TIGR00453	TIGR00453: ispD: 2-C-methyl-D-erythritol 4-phosphate cytidylyltransferase	0	0	0	1	1	0	0	1	1	1	0	1	0	1	1	0	1	1	1	1	1	1	1	1	1	1	0	1	0	0	1	1	1	1	1	1	1	0	1	1	1	1	1	1	1	1	0	1
TIGR00456	TIGR00456: argS: arginine--tRNA ligase	0	0	1	1	1	1	0	0	0	0	0	1	0	1	0	0	1	1	0	1	1	1	1	1	0	1	0	1	1	1	1	0	1	1	1	1	1	0	1	1	1	1	1	1	1	1	1	1
TIGR00459	TIGR00459: aspS_bact: aspartate--tRNA ligase	1	1	1	1	1	0	0	0	0	0	0	1	0	1	1	0	1	0	1	1	1	1	1	1	1	1	1	1	1	0	1	1	1	0	1	1	0	1	1	1	1	1	1	1	1	1	1	1
TIGR00460	TIGR00460: fmt: methionyl-tRNA formyltransferase	1	1	1	1	0	1	0	1	1	1	0	1	0	1	1	1	1	1	1	1	1	1	1	0	1	1	1	1	1	1	1	1	1	0	1	1	1	0	1	1	1	1	1	1	1	1	1	1
TIGR00466	TIGR00466: kdsB: 3-deoxy-D-manno-octulosonate cytidylyltransferase	1	1	1	1	0	1	1	1	1	1	1	1	1	1	1	1	1	1	1	1	1	1	1	1	1	1	0	1	1	0	1	1	1	1	1	1	1	0	1	1	1	1	1	1	1	1	1	1
TIGR00467	TIGR00467: lysS_arch: lysine--tRNA ligase	1	1	1	1	1	1	1	1	1	1	1	1	1	1	1	1	0	1	1	1	1	1	0	1	0	1	1	1	1	1	1	1	1	1	1	1	1	1	1	1	1	1	1	1	1	1	1	1
TIGR00468	TIGR00468: pheS: phenylalanine--tRNA ligase, alpha subunit	1	1	1	0	1	0	0	1	0	1	1	1	1	1	1	1	1	0	1	1	1	1	1	1	1	1	1	1	1	1	1	1	1	1	1	1	1	0	1	1	1	1	1	1	1	1	1	1
TIGR00472	TIGR00472: pheT_bact: phenylalanine--tRNA ligase, beta subunit	0	0	1	0	1	0	1	0	0	0	0	0	0	1	1	1	1	0	1	1	1	1	1	1	1	1	0	1	1	1	1	1	1	0	0	1	1	1	1	1	1	1	1	1	1	1	1	1
TIGR00473	TIGR00473: pssA: CDP-diacylglycerol-serine O-phosphatidyltransferase	0	0	1	1	0	0	0	0	0	1	0	1	0	1	0	1	1	1	1	1	1	1	1	0	1	1	0	1	1	1	1	1	1	0	0	1	0	0	1	1	1	1	1	1	1	1	1	1
TIGR00482	TIGR00482: TIGR00482: nicotinate (nicotinamide) nucleotide adenylyltransferase	1	1	1	1	0	1	1	1	1	0	0	1	0	1	0	1	1	0	1	1	0	1	1	1	1	1	1	1	1	1	1	1	1	0	1	1	1	1	1	1	1	1	1	1	1	1	1	1
TIGR00483	TIGR00483: EF-1_alpha: translation elongation factor EF-1, subunit alpha	1	1	1	1	1	0	1	1	0	0	1	1	0	1	1	1	1	0	1	1	1	1	0	1	1	1	1	1	1	1	1	1	1	0	0	0	1	0	1	1	1	1	1	1	1	1	1	1
TIGR00484	TIGR00484: EF-G: translation elongation factor G	1	1	1	1	1	1	0	1	1	0	0	0	1	0	1	1	1	0	0	1	0	1	1	1	1	1	1	1	1	1	1	1	1	1	1	1	1	1	1	1	1	1	1	1	1	1	1	1
TIGR00485	TIGR00485: EF-Tu: translation elongation factor Tu	1	1	1	1	1	0	1	1	0	0	1	1	0	1	1	1	1	0	1	1	1	1	0	1	1	1	1	1	1	1	1	1	1	0	0	0	1	0	1	1	1	1	1	1	1	1	1	1
TIGR00487	TIGR00487: IF-2: translation initiation factor IF-2	1	1	1	1	1	1	0	1	0	0	1	1	1	0	0	1	1	0	1	1	1	1	1	1	1	1	1	1	1	1	1	1	1	0	1	1	1	0	1	1	1	1	1	1	1	1	1	1
TIGR00493	TIGR00493: clpP: ATP-dependent Clp endopeptidase, proteolytic subunit ClpP	1	1	1	1	1	0	0	1	1	1	0	1	1	1	0	1	1	0	1	1	1	1	0	1	1	1	1	1	1	1	1	1	1	0	1	1	1	1	1	1	1	1	1	1	1	1	1	1
TIGR00496	TIGR00496: frr: ribosome recycling factor	0	0	1	1	0	0	0	0	0	0	0	1	0	1	0	0	1	1	1	1	1	0	1	0	1	1	0	1	1	1	1	1	1	1	1	1	1	1	1	1	1	1	1	1	1	1	1	1
TIGR00498	TIGR00498: lexA: repressor LexA	1	1	1	1	1	1	1	1	1	1	1	1	1	0	1	1	1	1	1	1	1	1	1	1	1	1	0	1	1	1	1	1	1	0	1	1	0	1	1	1	1	1	1	1	1	1	1	1
TIGR00500	TIGR00500: met_pdase_I: methionine aminopeptidase, type I	1	1	1	1	1	1	1	1	1	1	1	1	1	1	1	1	1	0	0	1	1	1	1	1	1	1	1	1	1	1	1	1	1	1	0	0	1	0	1	1	1	1	1	1	1	1	1	1
TIGR00501	TIGR00501: met_pdase_II: methionine aminopeptidase, type II	1	1	1	1	1	1	1	1	1	1	1	1	1	1	1	1	1	0	0	1	1	1	1	0	1	1	1	1	1	1	1	1	1	0	0	0	1	0	1	1	1	1	1	1	1	1	1	1
TIGR00503	TIGR00503: prfC: peptide chain release factor 3	1	1	1	1	1	1	0	1	1	0	0	0	1	0	1	1	1	0	0	1	0	1	1	1	1	1	1	1	1	1	1	1	1	1	1	1	1	1	1	1	1	1	1	1	1	1	1	1
TIGR00506	TIGR00506: ribB: 3,4-dihydroxy-2-butanone-4-phosphate synthase	1	1	1	1	1	1	1	0	0	0	0	1	0	1	1	0	1	0	1	1	1	0	0	0	1	1	0	1	1	1	0	0	1	0	1	1	0	0	1	1	1	1	1	1	1	1	0	1
TIGR00507	TIGR00507: aroE: shikimate 5-dehydrogenase	1	1	1	1	1	1	1	1	1	1	1	1	1	1	1	0	1	1	1	1	1	1	1	0	1	1	1	1	1	1	1	1	0	0	1	0	0	0	1	1	1	1	1	1	1	1	1	1
TIGR00508	TIGR00508: bioA: adenosylmethionine-8-amino-7-oxononanoate transaminase	1	1	1	1	1	1	1	1	1	0	1	1	1	1	1	1	1	1	1	1	1	1	1	1	1	1	1	1	1	1	1	1	1	1	1	1	1	1	1	1	1	1	1	1	1	1	1	1
TIGR00510	TIGR00510: lipA: lipoyl synthase	0	0	0	1	1	1	1	1	1	0	1	1	1	1	0	0	1	1	1	1	1	1	1	1	1	1	1	1	1	1	1	1	1	1	1	1	0	1	1	1	1	1	1	1	1	1	1	1
TIGR00513	TIGR00513: accA: acetyl-CoA carboxylase, carboxyl transferase, alpha subunit	1	1	1	1	1	1	1	1	1	1	1	1	1	1	1	1	0	0	1	1	1	1	1	1	1	1	1	1	1	1	1	1	1	0	0	1	1	1	1	1	1	1	1	1	1	1	1	1
TIGR00516	TIGR00516: acpS: holo-acyl-carrier-protein synthase	1	1	1	1	1	0	0	0	0	0	0	1	1	1	1	0	1	0	1	1	1	0	0	0	1	1	0	1	1	1	1	1	1	1	1	1	1	1	1	1	1	1	1	1	1	1	1	1
TIGR00517	TIGR00517: acyl_carrier: acyl carrier protein	1	1	1	1	1	0	0	0	0	0	0	1	1	1	0	0	1	1	1	1	0	1	1	0	1	1	0	1	1	1	1	1	1	0	1	1	1	0	1	1	1	1	1	1	1	1	1	1
TIGR00521	TIGR00521: coaBC_dfp: phosphopantothenoylcysteine decarboxylase / phosphopantothenate--cysteine ligase	1	1	0	1	1	0	1	0	0	0	1	1	1	1	1	0	1	0	1	1	1	1	1	1	1	1	1	1	1	1	1	1	1	1	1	1	1	1	1	1	1	1	1	1	1	1	1	1
TIGR00525	TIGR00525: folB: dihydroneopterin aldolase	1	1	1	1	1	1	1	1	1	1	1	0	1	1	1	1	1	1	1	1	0	1	1	0	1	1	0	1	1	1	1	1	1	0	1	1	1	0	1	1	1	1	1	1	1	1	1	1
TIGR00526	TIGR00526: folB_dom: FolB domain	1	1	1	1	1	1	1	1	1	1	1	0	1	1	1	1	1	1	1	1	0	1	1	0	1	1	0	1	1	1	1	1	1	0	1	1	1	0	1	1	1	1	1	1	1	1	1	1
TIGR00530	TIGR00530: AGP_acyltrn: 1-acylglycerol-3-phosphate O-acyltransferases	1	1	1	1	0	1	1	1	1	1	1	1	1	1	1	1	1	1	1	1	1	1	1	1	1	1	1	1	1	1	1	1	1	1	1	1	1	1	1	1	1	1	1	1	1	1	1	1
TIGR00531	TIGR00531: BCCP: acetyl-CoA carboxylase, biotin carboxyl carrier protein	1	1	0	1	1	0	0	0	1	0	0	1	0	1	1	0	1	1	1	1	1	1	1	1	1	0	0	0	1	1	1	1	1	0	1	0	0	1	1	1	1	1	1	1	1	1	1	1
TIGR00543	TIGR00543: isochor_syn: isochorismate synthase	0	0	1	1	1	0	0	1	1	0	0	1	0	1	1	0	1	1	1	1	1	1	1	1	1	1	1	1	1	1	1	1	1	1	1	1	0	0	1	1	1	1	1	1	1	1	1	1
TIGR00544	TIGR00544: lgt: prolipoprotein diacylglyceryl transferase	0	0	0	1	1	1	1	1	1	1	1	1	0	1	1	1	1	1	1	1	1	1	1	1	1	1	0	1	1	1	1	1	1	1	1	1	1	0	1	1	1	1	1	1	1	1	1	1
TIGR00546	TIGR00546: lnt: apolipoprotein N-acyltransferase	1	1	1	1	1	1	1	1	1	1	1	1	1	1	1	0	1	1	1	1	1	1	1	1	1	1	0	1	1	1	1	1	1	1	0	1	1	1	1	1	1	1	1	1	1	1	1	1
TIGR00550	TIGR00550: nadA: quinolinate synthetase complex, A subunit	1	1	1	1	1	1	0	0	0	0	0	1	1	0	1	1	1	1	1	1	1	1	1	0	1	1	0	1	1	1	1	1	1	1	1	1	0	1	1	1	1	1	1	1	1	1	1	1
TIGR00551	TIGR00551: nadB: L-aspartate oxidase	1	1	1	1	1	1	1	1	1	1	1	0	1	1	1	1	1	1	1	1	0	1	1	1	1	1	1	1	1	1	1	1	1	0	1	1	1	1	1	1	1	1	1	1	1	1	1	1
TIGR00552	TIGR00552: nadE: NAD+ synthetase	1	1	1	1	1	1	0	0	0	0	0	1	0	1	0	1	1	0	1	0	1	1	0	0	0	1	1	1	1	1	1	1	1	1	1	1	1	0	1	1	1	1	1	1	1	1	1	1
TIGR00553	TIGR00553: pabB: aminodeoxychorismate synthase, component I	0	0	1	1	1	0	0	1	1	0	0	1	0	1	1	0	1	1	1	1	1	1	1	1	1	1	1	1	1	1	1	1	1	1	1	1	0	0	1	1	1	1	1	1	1	1	1	1
TIGR00556	TIGR00556: pantethn_trn: phosphopantetheine--protein transferase domain	1	1	1	1	1	0	0	0	0	0	0	1	1	1	1	0	1	0	1	1	1	0	0	0	1	1	0	1	1	1	1	1	1	1	1	1	1	1	1	1	1	1	1	1	1	1	1	1
TIGR00558	TIGR00558: pdxH: pyridoxamine 5'-phosphate oxidase	1	1	1	1	1	1	0	1	1	1	0	1	0	1	0	0	0	0	1	1	1	1	1	1	1	1	1	1	1	1	1	1	1	1	1	1	1	1	1	1	1	1	1	1	1	1	1	1
TIGR00559	TIGR00559: pdxJ: pyridoxine 5'-phosphate synthase	1	1	1	1	1	0	0	0	0	0	0	1	1	1	1	0	1	0	1	1	1	0	0	1	1	1	0	1	1	1	1	1	1	1	1	1	1	1	1	1	1	1	1	1	1	1	1	1
TIGR00560	TIGR00560: pgsA: CDP-diacylglycerol--glycerol-3-phosphate 3-phosphatidyltransferase	1	1	1	1	1	1	1	1	1	1	0	1	1	1	1	1	1	1	1	1	0	1	1	1	1	1	0	1	1	1	1	1	1	1	1	1	1	1	1	1	1	1	1	1	1	1	1	1
TIGR00564	TIGR00564: trpE_most: anthranilate synthase component I	0	0	1	1	1	0	0	1	1	0	0	1	0	1	1	0	1	1	1	1	1	1	1	1	1	1	0	1	1	1	1	1	1	1	1	1	0	0	1	1	1	1	1	1	1	1	1	1
TIGR00565	TIGR00565: trpE_proteo: anthranilate synthase component I	0	0	1	1	1	0	0	1	1	0	0	1	0	1	1	0	1	1	1	1	1	1	1	1	1	1	0	1	1	1	1	1	1	1	1	1	0	0	1	1	1	1	1	1	1	1	1	1
TIGR00566	TIGR00566: trpG_papA: glutamine amidotransferase of anthranilate synthase or aminodeoxychorismate synthase	1	1	1	1	1	1	0	1	1	1	0	1	0	1	1	0	1	1	1	1	1	1	1	1	1	1	1	1	1	1	1	1	1	1	1	1	0	1	1	1	1	1	1	1	1	1	1	1
TIGR00573	TIGR00573: dnaq: exonuclease, DNA polymerase III, epsilon subunit family	1	1	1	1	1	1	1	0	1	1	1	1	1	1	1	1	1	1	1	1	1	1	1	1	1	1	0	1	1	1	1	1	0	0	1	1	0	1	1	1	1	1	1	1	1	1	1	1
TIGR00575	TIGR00575: dnlj: DNA ligase, NAD-dependent	1	1	1	1	1	1	0	1	0	1	0	1	1	1	1	1	1	1	1	1	1	1	1	0	1	1	0	1	0	1	1	1	1	1	1	1	0	1	1	1	1	1	1	1	1	1	0	1
TIGR00576	TIGR00576: dut: dUTP diphosphatase	1	1	0	1	1	1	1	0	0	0	1	1	0	1	1	0	1	0	1	1	1	1	1	1	1	1	1	1	1	1	1	1	1	1	1	1	1	1	1	1	1	1	1	1	1	1	1	1
TIGR00577	TIGR00577: fpg: formamidopyrimidine-DNA glycosylase	0	0	1	0	1	1	1	1	0	1	1	1	1	1	1	1	1	0	0	1	1	1	1	1	1	1	0	1	0	1	1	1	1	0	1	1	1	1	1	1	1	1	1	1	1	1	1	1
TIGR00593	TIGR00593: pola: DNA polymerase I	1	1	1	1	1	1	0	1	1	1	1	1	1	1	1	1	1	1	1	1	1	0	1	1	1	1	0	1	0	1	1	1	1	0	1	1	1	1	1	1	1	1	1	1	1	1	1	1
TIGR00595	TIGR00595: priA: primosomal protein N'	1	1	1	1	0	0	1	0	1	1	1	1	0	1	0	1	1	1	1	1	0	0	1	1	1	1	0	1	1	1	1	1	1	1	1	0	1	1	1	1	1	1	1	1	1	1	1	1
TIGR00613	TIGR00613: reco: DNA repair protein RecO	1	1	1	1	0	0	0	0	0	0	0	1	0	1	0	0	1	1	1	1	1	0	0	0	1	1	0	1	1	1	1	1	1	0	1	1	0	1	1	1	1	1	1	1	1	1	0	1
TIGR00615	TIGR00615: recR: recombination protein RecR	1	1	1	1	0	1	1	1	1	1	1	1	1	1	1	1	1	1	1	1	1	1	1	1	0	1	1	1	1	1	1	1	1	1	1	1	1	1	1	1	1	1	1	1	1	1	1	1
TIGR00621	TIGR00621: ssb: single-stranded DNA-binding protein	1	1	1	1	1	1	0	1	1	1	1	1	1	1	1	1	1	1	1	1	1	1	1	1	1	1	1	1	1	1	1	1	1	1	1	1	1	1	1	1	1	1	1	1	1	1	1	1
TIGR00630	TIGR00630: uvra: excinuclease ABC subunit A	1	1	1	1	1	1	1	1	0	0	0	1	1	1	1	1	1	0	1	1	1	1	1	1	1	1	1	1	0	1	1	1	1	1	1	1	1	1	1	1	1	1	1	1	1	1	1	1
TIGR00631	TIGR00631: uvrb: excinuclease ABC subunit B	1	1	1	1	1	1	1	1	1	1	1	0	1	1	1	1	1	1	1	1	0	1	1	0	1	1	0	1	1	1	1	1	1	0	1	1	1	0	1	1	1	1	1	1	1	1	1	1
TIGR00633	TIGR00633: xth: exodeoxyribonuclease III (xth)	1	1	1	1	1	1	1	0	1	1	0	1	1	1	1	0	1	1	0	1	1	1	1	0	1	1	0	1	0	1	1	1	1	1	1	1	1	1	1	1	1	1	1	1	1	1	1	1
TIGR00643	TIGR00643: recG: ATP-dependent DNA helicase RecG	1	1	1	1	0	1	1	0	1	1	0	1	0	1	1	1	1	0	1	1	1	1	0	1	1	1	1	1	1	1	1	0	1	1	1	1	1	1	1	1	1	1	1	1	1	1	0	1
TIGR00649	TIGR00649: MG423: conserved hypothetical protein	1	1	1	1	1	0	0	1	0	0	0	1	0	1	1	0	1	1	1	1	1	1	1	0	0	1	1	1	1	1	1	1	1	1	1	0	0	1	1	1	1	1	1	1	1	1	1	1
TIGR00652	TIGR00652: DapF: diaminopimelate epimerase	1	1	1	0	1	1	1	1	1	1	1	1	1	1	0	1	1	1	1	1	1	1	1	1	1	1	0	1	1	0	1	1	1	1	1	1	1	0	1	1	1	1	1	1	1	1	1	1
TIGR00653	TIGR00653: GlnA: glutamine synthetase, type I	1	1	1	1	1	1	1	1	1	1	0	1	1	1	1	1	1	0	1	1	1	1	1	1	1	1	1	1	1	1	1	1	1	1	1	1	1	0	1	1	1	1	1	1	1	1	1	1
TIGR00658	TIGR00658: orni_carb_tr: ornithine carbamoyltransferase	1	1	1	1	1	1	1	1	1	1	1	1	1	1	1	1	1	1	1	1	1	1	1	1	1	1	1	1	1	1	1	1	1	1	1	1	1	1	1	1	1	1	1	1	1	1	1	1
TIGR00663	TIGR00663: dnan: DNA polymerase III, beta subunit	1	1	1	1	1	0	0	1	1	0	1	1	1	1	1	1	1	0	1	1	1	1	1	1	1	1	1	1	1	1	1	1	1	1	1	1	1	0	1	1	1	1	1	1	1	1	1	1
TIGR00665	TIGR00665: DnaB: replicative DNA helicase	1	1	1	1	1	0	0	0	0	1	0	1	1	1	0	1	1	1	1	1	0	1	0	0	1	1	0	1	1	1	1	1	1	0	1	0	0	0	1	1	1	1	1	1	1	1	1	1
TIGR00670	TIGR00670: asp_carb_tr: aspartate carbamoyltransferase	1	1	1	1	1	1	1	1	1	1	1	1	1	1	1	1	1	1	1	1	1	1	1	1	1	1	1	1	1	1	1	1	1	1	1	1	1	1	1	1	1	1	1	1	1	1	1	1
TIGR00674	TIGR00674: dapA: dihydrodipicolinate synthase	1	1	1	1	1	0	1	0	0	1	0	1	0	1	0	0	1	1	1	1	1	1	1	1	1	1	1	1	1	1	1	1	1	1	1	1	1	1	1	1	1	1	1	1	1	1	1	1
TIGR00683	TIGR00683: nanA: N-acetylneuraminate lyase	1	1	1	1	1	0	1	0	0	1	0	1	0	1	0	0	1	1	1	1	1	1	1	1	1	1	1	1	1	1	1	1	1	1	1	1	1	1	1	1	1	1	1	1	1	1	1	1
TIGR00687	TIGR00687: pyridox_kin: pyridoxal kinase	1	1	1	1	1	1	0	0	1	0	1	1	1	1	0	1	1	0	1	1	1	1	1	1	1	1	1	1	1	1	1	1	1	1	1	1	0	1	1	1	1	1	1	1	1	1	1	1
TIGR00689	TIGR00689: rpiB_lacA_lacB: sugar-phosphate isomerase, RpiB/LacA/LacB family	1	1	1	1	1	0	0	1	0	0	0	1	1	1	1	0	1	1	1	1	1	0	0	0	1	1	1	1	1	1	1	1	1	1	1	0	0	1	1	1	1	1	1	1	1	1	1	1
TIGR00691	TIGR00691: spoT_relA: RelA/SpoT family protein	1	1	1	1	1	0	0	0	0	0	1	1	0	1	1	0	1	0	1	1	1	0	0	1	1	1	1	1	1	1	1	1	1	1	1	1	1	1	1	1	1	1	1	1	1	1	1	1
TIGR00693	TIGR00693: thiE: thiamine-phosphate pyrophosphorylase	1	1	1	1	1	1	0	1	1	1	1	1	1	1	1	1	1	1	1	1	0	1	1	1	1	1	0	1	0	1	1	1	1	1	1	1	0	1	1	1	1	1	1	1	1	1	1	1
TIGR00700	TIGR00700: GABAtrnsam: 4-aminobutyrate transaminase	1	1	1	1	1	1	1	1	1	0	1	1	1	1	1	1	1	1	1	1	1	1	1	1	1	1	1	1	1	1	1	1	1	1	1	1	1	1	1	1	1	1	1	1	1	1	1	1
TIGR00701	TIGR00701: TIGR00701: TIGR00701 family protein	1	1	1	1	1	0	1	0	0	0	0	1	0	1	1	0	1	1	1	1	1	1	1	1	1	1	1	1	1	1	1	1	0	0	1	1	0	1	1	1	1	1	1	1	1	1	1	1
TIGR00707	TIGR00707: argD: transaminase, acetylornithine/succinylornithine family	1	1	1	1	1	1	1	1	1	0	1	1	1	1	1	1	1	1	1	1	1	1	1	1	1	1	1	1	1	1	1	1	1	1	1	1	1	1	1	1	1	1	1	1	1	1	1	1
TIGR00709	TIGR00709: dat: 2,4-diaminobutyrate 4-transaminase	1	1	1	1	1	1	1	1	1	0	1	1	1	1	1	1	1	1	1	1	1	1	1	1	1	1	1	1	1	1	1	1	1	1	1	1	1	1	1	1	1	1	1	1	1	1	1	1
TIGR00713	TIGR00713: hemL: glutamate-1-semialdehyde-2,1-aminomutase	1	1	1	1	1	1	1	1	1	0	1	1	1	1	1	1	1	1	1	1	1	1	1	1	1	1	1	1	1	1	1	1	1	1	1	1	1	1	1	1	1	1	1	1	1	1	1	1
TIGR00726	TIGR00726: TIGR00726: uncharacterized protein, YfiH family	0	0	0	1	1	1	1	1	1	1	1	1	1	1	1	1	1	0	1	1	1	0	1	1	0	1	0	1	1	1	1	1	1	1	1	1	1	1	1	1	1	1	1	1	1	1	1	1
TIGR00729	TIGR00729: TIGR00729: ribonuclease HII	1	1	1	1	1	1	1	1	1	1	1	0	1	1	1	1	1	0	1	1	1	1	1	1	1	1	1	1	1	1	1	0	1	1	1	1	0	0	1	1	1	1	1	1	1	1	0	1
TIGR00731	TIGR00731: ctc_TL5: ribosomal protein L25, Ctc-form	1	1	1	1	1	1	1	1	1	1	1	1	1	1	1	1	1	1	1	1	1	1	1	1	1	1	1	1	1	0	1	1	1	1	1	1	1	1	1	1	1	1	1	1	1	1	1	1
TIGR00737	TIGR00737: nifR3_yhdG: putative TIM-barrel protein, nifR3 family	1	1	1	1	1	0	0	1	1	0	0	1	0	1	0	0	1	0	1	1	1	1	1	1	1	1	1	1	0	1	1	1	1	0	1	0	1	0	1	1	1	1	1	1	1	1	1	1
TIGR00739	TIGR00739: yajC: preprotein translocase, YajC subunit	1	1	1	1	1	1	1	1	1	1	0	1	1	1	1	1	1	0	1	1	1	1	1	0	1	1	0	1	1	0	1	1	1	1	1	1	1	1	1	1	1	1	1	1	1	1	1	1
TIGR00742	TIGR00742: yjbN: tRNA dihydrouridine synthase A	1	1	1	1	1	0	0	1	1	0	0	1	0	1	0	0	1	0	1	1	1	1	1	1	1	1	1	1	0	1	1	1	1	0	1	0	1	0	1	1	1	1	1	1	1	1	1	1
TIGR00753	TIGR00753: undec_PP_bacA: undecaprenyl-diphosphatase UppP	1	1	1	1	1	1	1	1	1	1	1	1	0	1	1	1	1	1	1	1	0	1	1	1	0	1	0	1	1	1	1	1	1	1	1	1	1	1	1	1	1	1	1	1	1	1	1	1
TIGR00755	TIGR00755: ksgA: dimethyladenosine transferase	0	0	1	1	0	0	0	0	0	0	0	1	0	1	0	0	1	1	1	1	0	1	1	0	1	1	0	1	0	1	1	1	1	0	1	1	1	0	1	1	1	1	1	1	1	1	1	1
TIGR00758	TIGR00758: UDG_fam4: uracil-DNA glycosylase, family 4	1	1	1	1	1	1	1	1	1	1	1	1	1	1	1	1	1	1	1	1	1	1	1	1	1	1	1	1	1	1	1	1	1	1	1	1	0	0	1	1	1	1	1	1	1	1	1	1
TIGR00759	TIGR00759: aceE: pyruvate dehydrogenase (acetyl-transferring), homodimeric type	1	1	1	0	1	1	0	0	1	1	1	0	1	0	1	1	1	1	1	1	1	1	1	1	1	1	1	1	1	1	1	1	1	0	1	1	1	0	1	1	1	1	1	1	1	1	1	1
TIGR00761	TIGR00761: argB: acetylglutamate kinase	1	1	1	1	0	1	1	1	0	0	0	1	1	1	0	1	1	1	1	1	1	1	1	1	1	1	0	1	1	1	1	1	1	0	1	1	1	0	1	1	1	1	1	1	1	1	1	1
TIGR00767	TIGR00767: rho: transcription termination factor Rho	1	1	1	1	0	1	1	1	1	1	0	1	1	1	0	1	1	1	1	1	1	1	1	1	1	1	1	1	1	1	1	1	1	0	1	1	1	1	1	1	1	1	1	1	1	1	1	1
TIGR00768	TIGR00768: rimK_fam: alpha-L-glutamate ligases, RimK family	1	1	1	1	1	1	0	1	0	0	1	1	1	1	1	1	1	0	1	1	1	1	1	1	1	1	1	1	1	1	1	1	1	1	0	1	0	0	1	1	1	1	1	1	1	1	1	1
TIGR00786	TIGR00786: dctM: TRAP transporter, DctM subunit	1	1	1	1	1	1	1	1	1	1	1	1	1	1	1	1	1	1	1	1	1	1	1	1	1	1	1	1	1	1	1	0	1	0	1	1	1	1	1	1	1	1	1	1	1	1	1	1
TIGR00787	TIGR00787: dctP: TRAP transporter solute receptor, DctP family	1	1	1	1	1	1	1	1	1	1	1	0	1	1	1	1	1	1	1	1	1	1	1	1	1	1	1	1	1	1	1	0	1	1	1	1	1	1	1	1	1	1	1	1	1	1	1	1
TIGR00810	TIGR00810: secG: preprotein translocase, SecG subunit	1	1	1	1	1	0	1	0	0	0	0	1	0	1	1	1	1	1	1	1	1	1	1	1	1	1	1	1	1	1	1	1	1	1	1	1	0	0	1	1	1	1	1	1	1	1	1	1
TIGR00838	TIGR00838: argH: argininosuccinate lyase	1	1	1	1	1	1	1	1	1	1	1	1	1	1	1	1	1	1	1	1	1	1	1	1	1	1	1	1	1	1	1	1	1	1	1	1	1	1	1	1	1	1	1	1	1	1	1	1
TIGR00839	TIGR00839: aspA: aspartate ammonia-lyase	1	1	1	1	1	0	0	1	0	0	0	1	0	1	0	1	1	1	0	1	1	1	1	1	1	1	1	1	1	1	1	1	1	1	1	1	0	1	1	1	1	1	1	1	1	1	1	1
TIGR00855	TIGR00855: L12: ribosomal protein L7/L12	1	1	1	1	1	1	1	1	0	1	0	1	0	1	1	1	1	1	0	1	1	1	0	0	1	1	0	1	1	1	1	1	1	1	1	1	1	0	1	1	1	1	1	1	1	1	1	1
TIGR00857	TIGR00857: pyrC_multi: dihydroorotase, multifunctional complex type	1	1	1	1	1	1	1	1	0	1	1	1	1	1	1	1	1	1	1	1	1	1	1	1	1	1	1	1	1	1	1	1	1	1	1	1	1	1	1	1	1	1	1	1	1	1	1	1
TIGR00872	TIGR00872: gnd_rel: 6-phosphogluconate dehydrogenase (decarboxylating)	1	1	1	1	1	1	1	1	1	1	1	1	1	1	1	1	1	1	1	1	1	1	1	1	1	1	1	1	1	1	1	1	1	0	1	1	1	1	1	1	1	1	1	1	1	1	1	1
TIGR00875	TIGR00875: fsa_talC_mipB: fructose-6-phosphate aldolase	1	1	1	1	1	0	0	0	1	0	1	0	1	1	1	1	1	1	0	1	1	1	1	1	0	1	1	1	1	1	0	0	1	0	1	0	0	1	1	1	1	1	1	1	1	1	1	1
TIGR00878	TIGR00878: purM: phosphoribosylformylglycinamidine cyclo-ligase	0	0	0	1	1	1	1	1	1	1	0	1	1	0	1	0	1	0	0	1	1	1	0	1	1	1	1	1	1	1	1	1	1	1	1	1	0	0	1	1	1	1	1	1	1	1	1	1
TIGR00884	TIGR00884: guaA_Cterm: GMP synthase (glutamine-hydrolyzing), C-terminal domain	0	0	1	1	1	0	1	0	1	0	0	0	0	1	0	1	1	0	1	1	0	1	1	0	1	1	0	1	1	1	1	1	0	0	1	1	1	1	1	1	1	1	1	1	1	1	1	1
TIGR00888	TIGR00888: guaA_Nterm: GMP synthase (glutamine-hydrolyzing), N-terminal domain	1	1	1	1	1	1	0	1	1	1	0	1	0	1	1	0	1	1	1	1	1	1	1	1	1	1	1	1	1	1	1	1	1	1	1	1	0	1	1	1	1	1	1	1	1	1	1	1
TIGR00890	TIGR00890: 2A0111: oxalate/formate antiporter family transporter	1	1	1	1	1	1	1	1	0	1	0	0	0	0	1	1	1	1	1	1	1	1	1	0	1	1	1	1	0	1	1	1	1	1	0	0	0	1	1	1	1	1	1	1	1	1	1	1
TIGR00901	TIGR00901: 2A0125: AmpG-like permease	1	1	0	1	0	1	1	1	1	1	0	0	1	1	1	1	1	1	1	1	1	1	0	1	1	1	1	1	1	0	1	1	1	1	1	0	1	0	1	1	1	1	1	1	1	1	1	1
TIGR00904	TIGR00904: mreB: cell shape determining protein, MreB/Mrl family	1	1	1	1	1	1	0	1	1	1	1	1	1	1	0	0	1	1	1	1	1	0	1	1	1	1	1	1	1	1	1	1	1	0	1	1	1	1	1	1	1	1	1	1	1	1	1	1
TIGR00916	TIGR00916: 2A0604s01: protein-export membrane protein, SecD/SecF family	0	0	1	1	1	1	1	1	0	1	0	0	0	1	1	1	1	0	1	1	1	1	1	1	1	1	1	1	1	1	1	1	1	1	1	1	1	0	1	1	1	1	1	1	1	1	1	1
TIGR00922	TIGR00922: nusG: transcription termination/antitermination factor NusG	1	1	1	1	1	1	1	1	0	0	1	1	0	1	1	1	1	0	1	1	1	1	0	0	1	1	1	1	1	1	1	1	1	0	1	0	1	0	1	1	1	1	1	1	1	1	1	1
TIGR00928	TIGR00928: purB: adenylosuccinate lyase	1	1	1	1	1	1	1	1	1	1	1	1	1	1	1	1	1	1	0	1	1	1	1	1	1	1	1	1	1	1	1	1	1	1	1	1	1	1	1	1	1	1	1	1	1	1	1	1
TIGR00936	TIGR00936: ahcY: adenosylhomocysteinase	0	0	1	1	1	1	1	1	1	1	1	1	1	1	1	1	1	1	1	1	1	0	1	1	1	1	1	1	0	1	1	1	1	1	1	1	0	1	1	1	1	1	1	1	1	1	1	1
TIGR00940	TIGR00940: 2a6301s01: monovalent cation:proton antiporter	1	1	1	1	1	1	1	1	1	1	1	1	1	0	1	1	1	1	1	1	1	1	1	1	1	1	0	1	1	1	1	1	1	1	1	1	1	0	1	1	1	1	1	1	1	1	1	1
TIGR00944	TIGR00944: 2a6301s04: multicomponent K+:H+antiporter	1	1	1	1	1	1	1	1	1	1	1	1	1	0	1	1	1	1	1	1	1	1	1	1	1	1	0	1	1	1	1	1	1	1	1	1	1	1	1	1	1	1	1	1	1	1	1	1
TIGR00945	TIGR00945: tatC: twin arginine-targeting protein translocase TatC	1	1	1	1	1	1	0	0	0	0	0	1	1	1	1	1	1	1	1	1	1	1	1	1	0	1	0	1	1	0	1	1	1	1	1	1	1	0	1	1	1	1	1	1	1	1	1	1
TIGR00949	TIGR00949: 2A76: homoserine/Threonine efflux protein	1	1	1	1	1	0	1	0	0	1	1	1	1	1	1	1	1	0	1	1	1	1	1	1	1	0	0	0	1	1	0	0	1	0	1	1	1	1	1	1	1	1	1	1	1	1	1	1
TIGR00950	TIGR00950: 2A78: carboxylate/amino acid/amine transporter	1	1	1	1	1	0	1	1	1	1	1	1	1	1	1	1	1	1	1	1	1	1	1	1	1	1	1	1	1	1	1	1	1	1	1	1	1	1	1	1	1	1	1	1	1	1	1	1
TIGR00952	TIGR00952: S15_bact: ribosomal protein S15	1	1	1	1	1	1	0	1	0	0	1	1	1	1	1	0	1	0	1	1	1	1	1	1	1	1	1	1	1	1	1	1	1	0	1	1	1	0	1	1	1	1	1	1	1	1	1	1
TIGR00959	TIGR00959: ffh: signal recognition particle protein	1	1	1	0	1	1	1	1	1	1	1	1	1	1	1	1	1	1	1	1	1	1	1	1	1	1	1	1	1	1	1	1	1	1	1	1	1	1	1	1	1	1	1	1	1	1	1	1
TIGR00962	TIGR00962: atpA: ATP synthase F1, alpha subunit	1	1	1	1	0	1	1	1	1	1	0	1	1	1	0	1	1	1	1	1	0	0	1	1	1	1	1	1	1	1	1	1	1	1	1	1	1	1	1	1	1	1	1	1	1	1	1	1
TIGR00963	TIGR00963: secA: preprotein translocase, SecA subunit	1	1	1	1	1	1	0	0	1	1	1	1	1	1	1	1	0	0	1	1	1	1	1	0	1	1	1	1	1	1	1	1	1	0	0	1	1	1	1	1	1	1	1	1	1	1	1	1
TIGR00965	TIGR00965: dapD: 2,3,4,5-tetrahydropyridine-2,6-dicarboxylate N-succinyltransferase	1	1	1	1	0	1	0	0	0	0	0	0	1	1	0	0	1	1	1	1	1	1	1	1	1	1	1	1	1	1	1	1	1	0	1	0	1	1	1	1	1	1	1	1	1	1	1	1
TIGR00966	TIGR00966: 3a0501s07: protein-export membrane protein SecF	0	0	1	1	1	1	1	1	0	1	0	0	0	1	1	1	1	0	1	1	1	1	1	1	1	1	0	1	1	1	1	1	1	1	1	1	1	0	1	1	1	1	1	1	1	1	1	1
TIGR00967	TIGR00967: 3a0501s007: preprotein translocase, SecY subunit	1	1	1	1	1	1	1	1	1	1	1	1	1	1	1	1	1	1	1	1	1	1	1	1	1	1	0	1	1	1	1	0	1	0	1	1	0	1	1	1	1	1	1	1	1	1	1	1
TIGR00968	TIGR00968: 3a0106s01: sulfate ABC transporter, ATP-binding protein	1	1	1	1	1	1	1	1	1	1	1	1	1	1	1	1	1	1	1	1	1	1	1	1	1	1	1	1	1	1	1	1	1	1	1	1	1	1	1	1	1	1	1	1	1	1	1	1
TIGR00970	TIGR00970: leuA_yeast: 2-isopropylmalate synthase	1	1	1	1	1	1	1	1	1	1	1	1	1	1	1	1	1	0	1	1	1	1	1	1	1	1	1	1	1	1	1	1	1	1	1	1	1	1	1	1	1	1	1	1	1	1	1	1
TIGR00972	TIGR00972: 3a0107s01c2: phosphate ABC transporter, ATP-binding protein	1	1	1	1	1	1	1	1	1	1	1	1	1	1	1	1	1	1	1	1	1	1	1	1	1	1	1	1	1	1	1	1	1	1	1	1	1	1	1	1	1	1	1	1	1	1	1	1
TIGR00973	TIGR00973: leuA_bact: 2-isopropylmalate synthase	1	1	1	1	1	1	1	1	1	1	1	1	1	1	1	1	1	1	1	1	1	1	1	1	1	1	1	1	1	1	1	1	1	1	1	1	1	1	1	1	1	1	1	1	1	1	1	1
TIGR00974	TIGR00974: 3a0107s02c: phosphate ABC transporter, permease protein PstA	1	1	1	1	0	1	1	1	1	1	1	0	1	1	1	1	1	1	0	1	1	1	1	1	1	1	1	1	1	1	1	1	1	1	0	1	1	1	1	1	1	1	1	1	1	1	1	1
TIGR00977	TIGR00977: LeuA_rel: 2-isopropylmalate synthase/homocitrate synthase family protein	1	1	1	1	1	1	1	1	1	1	1	1	1	1	1	1	1	1	1	1	1	1	1	1	1	1	1	1	1	1	1	1	1	1	1	1	1	1	1	1	1	1	1	1	1	1	1	1
TIGR00978	TIGR00978: asd_EA: aspartate-semialdehyde dehydrogenase	1	1	1	1	1	0	1	0	0	0	0	1	0	0	0	0	1	1	1	1	1	1	1	1	1	1	1	1	1	1	1	0	1	0	1	1	1	0	1	1	1	1	1	1	1	1	1	1
TIGR00979	TIGR00979: fumC_II: fumarate hydratase, class II	1	1	1	1	1	1	1	1	1	1	0	1	1	1	1	1	1	1	0	1	0	1	1	1	1	1	1	1	1	1	1	1	1	1	1	1	0	1	1	1	1	1	1	1	1	1	0	1
TIGR00987	TIGR00987: himA: integration host factor, alpha subunit	1	1	1	1	1	1	1	1	1	0	0	1	0	1	1	1	1	1	1	1	1	1	1	1	1	1	1	1	1	1	1	1	1	1	1	1	1	1	1	1	1	1	1	1	1	1	1	1
TIGR00988	TIGR00988: hip: integration host factor, beta subunit	1	1	1	1	1	1	1	1	1	0	0	1	0	1	1	1	1	1	1	1	1	1	1	1	1	1	1	1	1	1	1	1	1	1	1	1	1	1	1	1	1	1	1	1	1	1	1	1
TIGR00997	TIGR00997: ispZ: intracellular septation protein A	1	1	1	1	1	0	0	1	1	1	1	1	0	1	0	1	1	1	1	1	1	0	1	1	0	1	0	1	1	1	1	1	1	0	0	1	1	1	1	1	1	1	1	1	1	1	1	1
TIGR01008	TIGR01008: rpsC_E_A: ribosomal protein S3	1	1	1	1	1	1	1	1	1	1	1	0	1	1	1	1	1	1	1	1	0	1	1	1	1	1	1	1	1	1	1	1	1	1	1	1	1	1	1	1	1	1	1	1	1	1	1	1
TIGR01009	TIGR01009: rpsC_bact: ribosomal protein S3	1	1	1	1	1	1	1	1	1	1	1	0	1	1	1	1	1	1	1	1	0	1	1	1	1	1	1	1	1	1	1	1	1	1	1	1	1	1	1	1	1	1	1	1	1	1	1	1
TIGR01011	TIGR01011: rpsB_bact: ribosomal protein S2	0	0	1	1	1	0	0	0	0	0	0	1	0	1	0	0	1	1	1	1	1	1	1	0	1	1	1	1	1	1	1	1	1	1	1	1	1	1	1	1	1	1	1	1	1	1	1	1
TIGR01016	TIGR01016: sucCoAbeta: succinate-CoA ligase, beta subunit	1	1	1	1	1	1	1	1	1	1	1	1	1	1	1	1	1	0	1	1	1	1	1	1	1	1	0	1	1	1	1	1	1	1	1	0	0	1	1	1	1	1	1	1	1	1	1	1
TIGR01017	TIGR01017: rpsD_bact: ribosomal protein S4	1	1	1	1	1	1	1	1	1	1	1	1	1	1	1	1	1	0	0	1	1	1	0	0	0	1	1	1	1	1	1	1	1	1	0	0	0	1	1	1	1	1	1	1	1	1	1	1
TIGR01019	TIGR01019: sucCoAalpha: succinate-CoA ligase, alpha subunit	1	1	1	1	1	1	1	1	1	1	1	1	1	1	1	1	1	1	1	1	1	1	1	1	1	1	1	1	1	1	1	1	1	1	1	1	0	0	1	1	1	1	1	1	1	1	1	1
TIGR01020	TIGR01020: rpsE_arch: ribosomal protein S5	1	1	1	1	1	0	0	1	1	1	0	1	1	1	1	1	1	1	1	1	1	1	1	1	1	1	1	1	1	1	1	0	1	0	1	1	0	1	1	1	1	1	1	1	1	1	1	1
TIGR01021	TIGR01021: rpsE_bact: ribosomal protein S5	1	1	1	1	1	0	0	1	1	1	0	1	1	1	1	1	1	1	1	1	1	1	1	1	1	1	1	1	1	1	1	0	1	0	1	1	0	1	1	1	1	1	1	1	1	1	1	1
TIGR01024	TIGR01024: rplS_bact: ribosomal protein L19	1	1	1	1	1	1	1	1	1	0	1	1	0	1	1	1	1	1	1	1	1	1	1	1	1	1	1	1	1	1	1	1	1	1	1	1	1	0	1	1	1	1	1	1	1	1	1	1
TIGR01025	TIGR01025: rpsS_arch: ribosomal protein S19	1	1	1	1	1	1	1	1	1	1	1	1	1	1	1	1	1	1	1	1	0	1	1	1	0	1	1	1	1	1	1	1	1	1	1	1	1	1	1	1	1	1	1	1	1	1	1	1
TIGR01026	TIGR01026: fliI_yscN: ATPase FliI/YscN family	1	1	1	1	0	1	1	1	1	1	0	1	1	1	0	1	1	1	1	1	1	1	1	1	1	1	1	1	1	1	1	1	1	1	1	1	1	1	1	1	1	1	1	1	1	1	1	1
TIGR01027	TIGR01027: proB: glutamate 5-kinase	1	1	1	1	0	1	1	1	1	1	1	1	0	1	0	1	1	0	1	1	0	1	1	1	1	1	0	1	1	1	1	1	0	1	1	1	0	1	1	1	1	1	1	1	1	1	1	1
TIGR01028	TIGR01028: S7_S5_E_A: ribosomal protein S7	1	1	1	1	1	1	0	1	1	0	0	1	1	0	1	1	1	1	0	1	0	1	1	1	1	1	1	1	1	1	1	1	1	1	1	1	1	0	1	1	1	1	1	1	1	1	1	1
TIGR01029	TIGR01029: rpsG_bact: ribosomal protein S7	1	1	1	1	1	1	0	1	1	0	0	1	1	0	1	1	1	1	0	1	0	1	1	1	1	1	1	1	1	1	1	1	1	1	1	1	1	0	1	1	1	1	1	1	1	1	1	1
TIGR01031	TIGR01031: rpmF_bact: ribosomal protein L32	1	1	1	1	1	1	1	1	0	0	0	1	1	1	1	0	1	1	1	1	1	0	0	1	1	1	0	1	1	1	1	0	1	1	0	1	1	1	1	1	1	1	1	1	1	1	0	1
TIGR01032	TIGR01032: rplT_bact: ribosomal protein L20	1	1	1	1	1	1	1	1	1	1	1	1	1	1	1	1	0	0	1	1	1	1	1	0	1	1	1	1	1	1	1	1	0	1	1	1	1	0	1	1	1	1	1	1	1	1	1	1
TIGR01033	TIGR01033: TIGR01033: DNA-binding regulatory protein, YebC/PmpR family	1	1	1	1	1	1	1	1	1	1	1	1	0	1	1	1	1	1	1	1	1	1	1	1	1	1	1	1	1	1	1	1	1	1	1	0	1	1	1	1	1	1	1	1	1	1	1	1
TIGR01034	TIGR01034: metK: methionine adenosyltransferase	1	1	1	1	1	1	1	1	1	1	1	1	1	1	0	1	1	0	1	1	1	1	1	1	1	1	0	1	1	1	1	1	1	1	1	0	1	1	1	1	1	1	1	1	1	1	1	1
TIGR01036	TIGR01036: pyrD_sub2: dihydroorotate dehydrogenase (fumarate)	1	1	1	1	1	1	1	1	0	1	1	1	1	1	1	1	0	1	1	1	1	1	0	1	0	1	1	1	1	1	1	1	1	1	1	1	1	1	1	1	1	1	1	1	1	1	1	1
TIGR01037	TIGR01037: pyrD_sub1_fam: dihydroorotate dehydrogenase family protein	1	1	1	1	1	1	1	1	1	1	1	1	1	1	1	1	1	1	1	1	1	1	0	1	1	1	1	1	1	1	1	1	1	1	1	1	1	1	1	1	1	1	1	1	1	1	1	1
TIGR01039	TIGR01039: atpD: ATP synthase F1, beta subunit	1	1	1	1	0	1	1	1	1	1	0	1	1	1	0	1	1	1	1	1	0	1	1	1	1	1	1	1	1	1	1	1	1	1	1	1	1	1	1	1	1	1	1	1	1	1	1	1
TIGR01040	TIGR01040: V-ATPase_V1_B: V-type ATPase, B subunit	1	1	1	1	0	1	1	1	1	1	0	1	1	1	0	1	1	1	1	1	0	0	1	1	1	1	1	1	1	1	1	1	1	1	1	1	1	1	1	1	1	1	1	1	1	1	1	1
TIGR01041	TIGR01041: ATP_syn_B_arch: ATP synthase archaeal, B subunit	1	1	1	1	0	1	1	1	1	1	0	1	1	1	0	1	1	1	1	1	0	0	1	1	1	1	1	1	1	1	1	1	1	1	1	1	1	1	1	1	1	1	1	1	1	1	1	1
TIGR01042	TIGR01042: V-ATPase_V1_A: V-type ATPase, A subunit	1	1	1	1	0	1	1	1	1	1	0	1	1	1	0	1	1	1	1	1	0	0	1	1	1	1	1	1	1	1	1	1	1	0	1	1	1	1	1	1	1	1	1	1	1	1	1	1
TIGR01043	TIGR01043: ATP_syn_A_arch: ATP synthase archaeal, A subunit	1	1	1	1	0	1	1	1	1	1	0	1	1	1	0	1	1	1	1	1	0	0	1	1	1	1	1	1	1	1	1	1	1	0	1	1	1	1	1	1	1	1	1	1	1	1	1	1
TIGR01044	TIGR01044: rplV_bact: ribosomal protein L22	1	1	1	1	1	1	1	1	1	1	1	1	1	1	1	1	1	0	1	1	0	1	1	1	1	1	1	1	1	1	1	1	1	1	1	1	1	1	1	1	1	1	1	1	1	1	1	1
TIGR01046	TIGR01046: S10_Arc_S20_Euk: ribosomal protein S10	1	1	1	1	1	1	0	1	1	0	0	1	1	1	1	1	1	1	0	1	0	1	1	1	1	1	1	1	1	1	1	1	1	1	1	1	1	1	1	1	1	1	1	1	1	1	1	1
TIGR01047	TIGR01047: nspC: carboxynorspermidine decarboxylase	1	1	1	1	0	1	1	1	1	1	1	1	1	1	1	1	1	1	1	1	1	1	1	1	1	1	0	1	1	1	1	1	0	1	1	1	1	1	1	1	1	1	1	1	1	1	1	1
TIGR01048	TIGR01048: lysA: diaminopimelate decarboxylase	1	1	1	1	1	1	1	1	1	1	1	1	1	1	1	1	1	1	1	1	1	1	1	1	1	1	0	1	1	1	1	1	1	1	1	1	1	1	1	1	1	1	1	1	1	1	1	1
TIGR01049	TIGR01049: rpsJ_bact: ribosomal protein S10	1	1	1	1	1	1	0	1	1	0	0	1	1	1	1	1	1	1	0	1	0	1	1	1	1	1	1	1	1	1	1	1	1	1	1	1	1	1	1	1	1	1	1	1	1	1	1	1
TIGR01050	TIGR01050: rpsS_bact: ribosomal protein S19	1	1	1	1	1	1	1	1	1	1	1	1	1	1	1	1	1	1	1	1	0	1	1	1	0	1	1	1	1	1	1	1	1	1	1	1	1	1	1	1	1	1	1	1	1	1	1	1
TIGR01051	TIGR01051: topA_bact: DNA topoisomerase I	1	1	1	1	0	0	0	0	0	0	0	0	1	1	0	1	1	0	1	1	1	1	1	0	1	1	0	1	1	1	1	0	1	1	1	1	0	1	1	1	1	1	1	1	1	1	1	1
TIGR01055	TIGR01055: parE_Gneg: DNA topoisomerase IV, B subunit	1	1	1	1	1	1	1	1	1	1	0	0	1	1	1	1	1	1	1	1	1	1	1	1	1	1	1	1	0	1	1	1	1	0	1	1	1	1	1	1	1	1	1	1	1	1	1	1
TIGR01056	TIGR01056: topB: DNA topoisomerase III	1	1	1	1	0	0	0	0	0	0	0	0	1	1	0	1	1	0	1	1	1	1	1	0	1	1	0	1	1	1	1	0	1	1	1	1	0	1	1	1	1	1	1	1	1	1	1	1
TIGR01057	TIGR01057: topA_arch: DNA topoisomerase I	1	1	1	1	0	0	0	0	0	0	0	0	1	1	0	1	1	0	1	1	1	1	1	0	1	1	0	1	1	1	1	0	1	1	1	1	0	1	1	1	1	1	1	1	1	1	1	1
TIGR01058	TIGR01058: parE_Gpos: DNA topoisomerase IV, B subunit	1	1	1	1	1	1	1	1	1	1	0	0	1	1	1	1	1	1	1	1	1	1	1	1	1	1	1	1	0	1	1	1	1	0	1	1	1	1	1	1	1	1	1	1	1	1	1	1
TIGR01059	TIGR01059: gyrB: DNA gyrase, B subunit	1	1	1	1	1	1	1	1	1	1	0	0	1	1	1	1	1	1	1	1	1	1	1	1	1	1	1	1	0	1	1	1	1	0	1	1	1	1	1	1	1	1	1	1	1	1	1	1
TIGR01060	TIGR01060: eno: phosphopyruvate hydratase	1	1	0	1	1	1	1	1	0	0	0	1	1	1	1	1	1	0	1	1	1	1	1	1	1	1	1	1	1	1	1	1	1	1	1	1	0	0	1	1	1	1	1	1	1	1	1	1
TIGR01061	TIGR01061: parC_Gpos: DNA topoisomerase IV, A subunit	1	1	1	1	1	0	1	1	1	1	1	1	0	1	1	1	1	1	1	1	1	1	0	1	1	1	0	1	0	1	1	1	1	0	0	1	1	0	1	1	1	1	1	1	1	1	1	1
TIGR01063	TIGR01063: gyrA: DNA gyrase, A subunit	1	1	1	1	1	0	1	1	1	1	1	1	1	1	1	1	1	1	1	1	1	1	1	1	1	1	0	1	0	1	1	1	1	0	0	1	1	1	1	1	1	1	1	1	1	1	1	1
TIGR01066	TIGR01066: rplM_bact: ribosomal protein L13	1	1	1	1	1	0	0	1	1	0	0	1	0	1	0	0	1	1	1	1	1	1	1	1	1	1	1	1	1	1	1	0	1	0	1	1	1	1	1	1	1	1	1	1	1	1	0	1
TIGR01067	TIGR01067: rplN_bact: ribosomal protein L14	1	1	1	1	1	1	1	1	1	1	1	1	1	1	1	1	1	1	1	1	0	1	1	1	1	1	0	1	1	1	1	1	1	0	1	1	0	1	1	1	1	1	1	1	1	1	1	1
TIGR01071	TIGR01071: rplO_bact: ribosomal protein L15	1	1	1	1	1	1	0	1	1	1	1	1	1	1	1	1	1	1	1	1	1	1	1	1	1	1	0	1	1	1	1	0	1	0	1	1	0	1	1	1	1	1	1	1	1	1	1	1
TIGR01072	TIGR01072: murA: UDP-N-acetylglucosamine 1-carboxyvinyltransferase	1	1	1	1	1	1	1	0	0	0	0	1	1	1	1	1	1	1	1	1	1	1	1	1	1	1	1	1	1	1	1	1	1	1	1	1	1	1	1	1	1	1	1	1	1	1	1	1
TIGR01073	TIGR01073: pcrA: ATP-dependent DNA helicase PcrA	0	0	1	1	1	1	1	1	1	0	0	1	0	1	1	0	1	1	0	1	0	1	1	0	1	1	1	1	1	1	1	1	1	0	1	1	0	1	1	1	1	1	1	1	1	1	0	1
TIGR01074	TIGR01074: rep: ATP-dependent DNA helicase Rep	0	0	1	1	1	1	1	1	1	0	0	1	0	1	1	0	1	1	0	1	0	1	1	0	1	1	1	1	1	1	1	1	1	0	1	1	0	1	1	1	1	1	1	1	1	1	0	1
TIGR01075	TIGR01075: uvrD: DNA helicase II	0	0	1	1	1	1	1	1	1	0	0	1	0	1	1	0	1	1	0	1	0	1	1	0	1	1	1	1	1	1	1	1	1	0	1	1	0	1	1	1	1	1	1	1	1	1	0	1
TIGR01077	TIGR01077: L13_A_E: ribosomal protein L13	1	1	1	1	1	0	0	1	1	0	0	1	0	1	0	0	1	1	1	1	1	1	1	1	1	1	1	1	1	1	1	0	1	0	1	1	1	1	1	1	1	1	1	1	1	1	0	1
TIGR01079	TIGR01079: rplX_bact: ribosomal protein L24	1	1	1	1	1	1	1	1	1	1	1	1	1	1	1	1	1	1	1	1	0	1	1	1	1	1	0	1	1	1	1	0	1	0	1	1	0	1	1	1	1	1	1	1	1	1	1	1
TIGR01081	TIGR01081: mpl: UDP-N-acetylmuramate:L-alanyl-gamma-D-glutamyl-meso-diaminopimelate ligase	1	1	1	1	0	0	1	0	0	0	1	1	0	1	0	0	1	1	1	1	0	1	0	1	1	1	1	1	0	1	1	1	1	1	1	1	0	0	1	1	1	1	1	1	1	1	1	1
TIGR01082	TIGR01082: murC: UDP-N-acetylmuramate--alanine ligase	1	1	1	1	1	1	1	1	1	0	1	1	1	1	1	1	1	1	1	1	1	1	0	1	1	1	1	1	1	1	1	1	1	1	1	1	1	1	1	1	1	1	1	1	1	1	1	1
TIGR01084	TIGR01084: mutY: A/G-specific adenine glycosylase	0	0	1	1	1	1	1	0	1	1	1	1	1	1	1	1	1	1	1	1	1	1	1	1	1	1	1	1	0	1	1	1	1	0	1	1	0	1	1	1	1	1	1	1	1	1	0	1
TIGR01087	TIGR01087: murD: UDP-N-acetylmuramoylalanine--D-glutamate ligase	1	1	1	1	1	1	1	1	1	1	1	1	1	1	1	1	1	1	1	1	1	1	0	1	1	1	1	1	1	1	1	1	1	1	1	1	0	1	1	1	1	1	1	1	1	1	1	1
TIGR01088	TIGR01088: aroQ: 3-dehydroquinate dehydratase, type II	0	0	1	1	1	0	1	0	1	0	0	1	0	1	1	0	1	1	1	1	1	1	1	1	1	1	0	1	1	1	1	1	1	0	1	0	0	1	1	1	1	1	1	1	1	1	1	1
TIGR01092	TIGR01092: P5CS: delta l-pyrroline-5-carboxylate synthetase	0	0	0	1	0	1	1	1	1	1	0	1	0	1	0	1	1	0	1	1	0	1	1	1	1	1	0	1	1	1	1	1	0	0	1	1	1	1	1	1	1	1	1	1	1	1	1	1
TIGR01104	TIGR01104: V_PPase: V-type H(+)-translocating pyrophosphatase	1	1	1	1	1	1	1	1	0	0	0	1	1	1	1	1	1	1	1	1	1	0	0	1	1	1	1	1	1	1	1	0	1	1	0	1	0	1	1	1	1	1	1	1	1	1	0	1
TIGR01118	TIGR01118: lacA: galactose-6-phosphate isomerase, LacA subunit	1	1	1	1	1	0	0	1	0	0	0	1	1	1	1	0	1	1	1	1	1	0	0	0	1	1	1	1	1	1	1	1	1	1	1	0	0	1	1	1	1	1	1	1	1	1	1	1
TIGR01119	TIGR01119: lacB: galactose-6-phosphate isomerase, LacB subunit	1	1	1	1	1	0	0	1	0	0	0	1	1	1	1	0	1	1	1	1	1	0	0	0	1	1	1	1	1	1	1	1	1	1	1	0	0	1	1	1	1	1	1	1	1	1	1	1
TIGR01120	TIGR01120: rpiB: ribose 5-phosphate isomerase B	1	1	1	1	1	0	0	1	0	0	0	1	1	1	1	0	1	1	1	1	1	0	0	0	1	1	1	1	1	1	1	1	1	1	1	0	0	1	1	1	1	1	1	1	1	1	1	1
TIGR01121	TIGR01121: D_amino_aminoT: D-amino-acid transaminase	1	1	1	1	1	1	1	1	1	1	1	1	1	1	1	1	1	1	1	1	0	1	1	1	1	1	1	1	1	1	1	1	1	1	1	1	1	1	1	1	1	1	1	1	1	1	1	1
TIGR01122	TIGR01122: ilvE_I: branched-chain amino acid aminotransferase	1	1	1	1	1	1	1	1	1	1	1	1	1	1	1	1	1	1	1	1	0	1	1	1	1	1	1	1	1	1	1	1	1	1	1	1	1	1	1	1	1	1	1	1	1	1	1	1
TIGR01123	TIGR01123: ilvE_II: branched-chain amino acid aminotransferase	1	1	1	1	1	1	1	1	1	1	1	1	1	1	1	1	1	1	1	1	0	1	1	1	1	1	0	1	1	1	1	1	1	1	1	1	1	1	1	1	1	1	1	1	1	1	1	1
TIGR01125	TIGR01125: TIGR01125: ribosomal protein S12 methylthiotransferase RimO	1	1	1	1	1	0	0	1	0	0	0	1	0	1	1	1	1	1	1	1	1	1	1	1	1	1	1	1	1	1	1	1	1	1	1	1	1	1	1	1	1	1	1	1	1	1	1	1
TIGR01129	TIGR01129: secD: protein-export membrane protein SecD	0	0	1	1	1	1	1	1	1	1	0	1	1	1	1	1	1	0	1	1	1	1	1	0	1	1	0	1	1	1	1	1	1	1	1	1	1	0	1	1	1	1	1	1	1	1	1	1
TIGR01131	TIGR01131: ATP_synt_6_or_A: ATP synthase F0, A subunit	1	1	1	1	1	1	1	1	1	1	1	1	0	1	1	1	1	1	1	1	1	1	1	1	1	1	1	1	0	1	1	1	1	1	1	1	0	1	1	1	1	1	1	1	1	1	1	1
TIGR01133	TIGR01133: murG: undecaprenyldiphospho-muramoylpentapeptide beta-N-acetylglucosaminyltransferase	1	1	1	1	0	1	1	0	0	0	1	1	0	1	0	0	1	1	1	1	1	1	0	1	1	1	0	1	1	1	1	1	1	1	1	1	0	0	1	1	1	1	1	1	1	1	1	1
TIGR01134	TIGR01134: purF: amidophosphoribosyltransferase	1	1	1	1	1	0	0	0	0	0	0	1	0	1	1	1	1	0	1	1	0	1	0	0	1	1	0	1	1	1	1	1	0	1	0	0	1	0	1	1	1	1	1	1	1	1	1	1
TIGR01140	TIGR01140: L_thr_O3P_dcar: threonine-phosphate decarboxylase	1	1	1	1	1	1	1	1	1	1	1	1	1	1	1	1	1	1	1	1	1	1	1	1	1	1	1	1	1	1	1	1	1	1	1	1	1	1	1	1	1	1	1	1	1	1	1	1
TIGR01141	TIGR01141: hisC: histidinol-phosphate transaminase	1	1	1	1	1	1	1	1	1	1	1	1	1	1	1	1	1	1	1	1	1	1	1	1	1	1	1	1	1	1	1	1	1	1	1	1	1	1	1	1	1	1	1	1	1	1	1	1
TIGR01143	TIGR01143: murF: UDP-N-acetylmuramoyl-tripeptide--D-alanyl-D-alanine ligase	1	1	1	1	1	1	1	1	1	1	1	1	1	1	1	1	1	1	1	1	1	0	0	1	1	1	0	1	0	1	1	1	1	1	0	1	0	1	1	1	1	1	1	1	1	1	0	1
TIGR01144	TIGR01144: ATP_synt_b: ATP synthase F0, B subunit	0	0	1	1	1	1	1	1	1	1	1	1	0	1	1	1	1	1	1	1	1	1	1	1	1	1	0	1	0	1	1	1	1	1	1	1	0	1	1	1	1	1	1	1	1	1	1	1
TIGR01145	TIGR01145: ATP_synt_delta: ATP synthase F1, delta subunit	1	1	1	1	0	1	1	0	1	1	1	1	1	1	0	1	1	1	1	1	0	0	1	1	1	1	0	1	1	1	1	1	1	1	1	0	1	1	1	1	1	1	1	1	1	1	1	1
TIGR01146	TIGR01146: ATPsyn_F1gamma: ATP synthase F1, gamma subunit	1	1	0	1	0	1	1	1	0	0	0	1	1	1	0	1	1	1	1	1	0	0	1	1	1	1	0	1	1	1	1	1	1	1	1	1	1	1	1	1	1	1	1	1	1	1	1	1
TIGR01161	TIGR01161: purK: phosphoribosylaminoimidazole carboxylase, ATPase subunit	1	1	1	1	1	0	1	0	1	0	0	1	1	0	1	0	1	1	1	1	1	1	1	1	1	1	0	1	1	1	1	1	1	0	1	1	1	0	1	1	1	1	1	1	1	1	1	1
TIGR01163	TIGR01163: rpe: ribulose-phosphate 3-epimerase	1	1	1	1	1	0	1	0	0	0	0	0	0	1	0	1	1	1	1	1	1	1	1	0	1	1	1	1	1	1	1	1	1	0	0	1	0	0	1	1	1	1	1	1	1	1	1	1
TIGR01164	TIGR01164: rplP_bact: ribosomal protein L16	1	1	1	1	1	1	1	1	1	1	1	1	1	1	1	1	1	1	1	1	0	1	1	1	1	1	1	1	0	1	1	1	1	1	1	1	1	0	1	1	1	1	1	1	1	1	1	1
TIGR01166	TIGR01166: cbiO: cobalt ABC transporter, ATP-binding protein	1	1	1	1	1	1	1	1	1	1	1	1	1	1	1	1	1	1	1	1	1	1	1	1	1	1	1	1	1	1	1	1	1	1	1	1	1	1	1	1	1	1	1	1	1	1	1	1
TIGR01169	TIGR01169: rplA_bact: ribosomal protein L1	1	1	1	1	1	1	1	1	0	0	1	1	0	1	0	1	1	0	1	1	1	1	0	0	1	1	0	1	1	1	1	1	1	1	1	1	1	0	1	1	1	1	1	1	1	1	1	1
TIGR01170	TIGR01170: rplA_mito: ribosomal protein L1, mitochondrial	1	1	1	1	1	1	1	1	0	0	1	1	0	1	0	1	1	0	1	1	1	1	0	0	1	1	0	1	1	1	1	1	1	1	1	1	1	0	1	1	1	1	1	1	1	1	1	1
TIGR01171	TIGR01171: rplB_bact: ribosomal protein L2	1	1	1	1	1	1	1	1	1	1	1	1	1	1	1	1	1	1	1	1	0	1	1	1	1	1	1	1	1	1	1	1	1	1	1	1	1	1	1	1	1	1	1	1	1	1	1	1
TIGR01176	TIGR01176: fum_red_Fp: fumarate reductase, flavoprotein subunit	1	1	1	1	1	1	1	1	1	1	1	0	1	1	1	1	1	1	1	1	0	1	1	1	1	1	1	1	1	1	1	1	1	0	1	1	1	1	1	1	1	1	1	1	1	1	1	1
TIGR01184	TIGR01184: ntrCD: nitrate ABC transporter, ATP-binding proteins C and D	1	1	1	1	1	1	1	1	1	1	1	1	1	1	1	1	1	1	1	1	1	1	1	1	1	1	1	1	1	1	1	1	1	1	1	1	1	1	1	1	1	1	1	1	1	1	1	1
TIGR01186	TIGR01186: proV: glycine betaine/L-proline transport ATP binding subunit	1	1	1	1	1	1	1	1	1	1	1	1	1	1	1	1	1	1	1	1	1	1	1	1	1	1	1	1	1	1	1	1	1	1	1	1	1	1	1	1	1	1	1	1	1	1	1	1
TIGR01187	TIGR01187: potA: polyamine ABC transporter, ATP-binding protein	1	1	1	1	1	1	1	1	1	1	1	1	1	1	1	1	1	1	1	1	1	1	1	1	1	1	1	1	1	1	1	1	1	1	1	1	1	1	1	1	1	1	1	1	1	1	1	1
TIGR01188	TIGR01188: drrA: daunorubicin resistance ABC transporter, ATP-binding protein	1	1	1	1	1	1	1	1	1	1	1	1	1	1	1	1	1	1	1	1	1	1	1	1	1	1	1	1	1	1	1	1	1	1	1	1	1	1	1	1	1	1	1	1	1	1	1	1
TIGR01189	TIGR01189: ccmA: heme ABC exporter, ATP-binding protein CcmA	1	1	1	1	1	1	1	1	1	1	1	1	1	1	1	1	1	1	1	1	1	1	1	1	1	1	1	1	1	1	1	1	1	1	1	1	1	1	1	1	1	1	1	1	1	1	1	1
TIGR01191	TIGR01191: ccmC: heme exporter protein CcmC	1	1	1	1	1	1	0	1	1	1	1	1	1	1	0	1	1	1	1	1	1	0	1	1	0	1	1	1	1	1	1	1	1	0	0	1	1	1	1	1	1	1	1	1	1	1	1	1
TIGR01196	TIGR01196: edd: phosphogluconate dehydratase	1	1	1	1	1	0	0	1	1	0	1	1	1	1	1	0	1	1	0	1	1	1	1	1	1	1	1	1	1	1	1	1	1	1	1	1	1	1	1	1	1	1	1	1	1	1	0	1
TIGR01205	TIGR01205: D_ala_D_alaTIGR: D-alanine--D-alanine ligase	1	1	1	1	1	1	0	0	0	0	1	1	1	1	1	1	1	1	0	1	0	1	1	1	1	1	0	1	1	1	1	1	1	1	1	1	1	1	1	1	1	1	1	1	1	1	1	1
TIGR01207	TIGR01207: rmlA: glucose-1-phosphate thymidylyltransferase	0	0	1	1	1	0	1	0	0	1	0	1	0	1	1	0	1	0	1	1	1	1	1	0	1	1	1	1	1	1	1	0	1	1	0	1	1	0	1	1	1	1	1	1	1	1	1	1
TIGR01216	TIGR01216: ATP_synt_epsi: ATP synthase F1, epsilon subunit	1	1	1	1	0	1	1	1	1	1	0	1	0	1	0	1	1	1	1	1	0	1	1	1	1	1	1	1	1	1	1	1	1	0	1	1	1	1	1	1	1	1	1	1	1	1	1	1
TIGR01217	TIGR01217: ac_ac_CoA_syn: acetoacetate-CoA ligase	1	1	1	1	1	1	1	1	1	1	1	1	1	0	1	1	1	1	1	1	1	1	1	1	1	1	1	1	1	1	1	1	1	0	1	1	1	1	1	1	1	1	1	1	1	1	1	1
TIGR01236	TIGR01236: D1pyr5carbox1: 1-pyrroline-5-carboxylate dehydrogenase	1	1	1	1	1	1	1	1	1	1	0	1	0	1	1	1	1	1	1	1	1	1	1	1	1	1	1	1	1	1	1	1	1	1	1	1	1	1	1	1	1	1	1	1	1	1	1	1
TIGR01237	TIGR01237: D1pyr5carbox2: putative delta-1-pyrroline-5-carboxylate dehydrogenase	1	1	1	1	1	1	1	1	1	1	0	1	1	1	1	1	1	1	1	1	1	1	1	1	1	1	1	1	1	1	1	1	1	1	1	1	1	1	1	1	1	1	1	1	1	1	1	1
TIGR01238	TIGR01238: D1pyr5carbox3: delta-1-pyrroline-5-carboxylate dehydrogenase	1	1	1	1	1	1	1	1	1	1	0	1	0	1	1	1	1	1	1	1	1	1	1	1	1	1	1	1	1	1	1	1	1	1	1	1	1	1	1	1	1	1	1	1	1	1	1	1
TIGR01241	TIGR01241: FtsH_fam: ATP-dependent metallopeptidase HflB	0	0	1	1	1	1	0	1	1	1	1	1	1	0	0	1	1	0	1	1	0	1	1	1	1	1	0	1	1	1	1	1	1	1	1	1	1	1	1	1	1	1	1	1	1	1	0	1
TIGR01245	TIGR01245: trpD: anthranilate phosphoribosyltransferase	0	0	1	1	1	1	1	1	1	1	0	1	0	1	1	0	1	1	1	1	1	1	1	1	1	1	0	1	1	1	1	1	1	0	1	1	0	0	1	1	1	1	1	1	1	1	1	1
TIGR01246	TIGR01246: dapE_proteo: succinyl-diaminopimelate desuccinylase	1	1	1	1	0	1	0	0	0	0	0	1	0	1	0	0	1	1	1	1	1	1	1	1	1	1	0	1	1	1	1	1	1	1	1	1	1	1	1	1	1	1	1	1	1	1	1	1
TIGR01247	TIGR01247: drrB: daunorubicin resistance ABC transporter membrane protein	1	1	1	1	0	1	1	1	1	0	1	1	1	1	0	1	0	1	1	1	1	1	1	0	1	1	1	1	1	1	1	1	1	1	1	1	1	1	1	1	1	1	1	1	1	1	1	1
TIGR01251	TIGR01251: ribP_PPkin: ribose-phosphate diphosphokinase	1	1	1	1	1	1	1	1	1	1	1	1	1	1	1	1	1	1	1	1	1	1	1	1	1	1	0	1	1	1	1	1	1	1	1	1	1	1	1	1	1	1	1	1	1	1	1	1
TIGR01258	TIGR01258: pgm_1: phosphoglycerate mutase 1 family	1	1	1	1	0	1	1	1	0	1	0	1	0	0	1	1	1	1	1	1	1	1	1	1	1	1	1	1	1	1	1	1	1	0	1	1	0	0	1	1	1	1	1	1	1	1	1	1
TIGR01260	TIGR01260: ATP_synt_c: ATP synthase F0, C subunit	1	1	1	1	1	1	1	1	1	1	1	1	0	1	1	1	1	1	1	1	1	1	1	1	1	1	1	1	0	1	1	1	1	1	1	1	0	1	1	1	1	1	1	1	1	1	1	1
TIGR01264	TIGR01264: tyr_amTase_E: tyrosine aminotransferase	1	1	1	1	1	1	1	1	1	1	1	1	1	1	1	1	1	1	1	1	1	1	1	1	1	1	1	1	1	1	1	1	1	1	1	1	1	1	1	1	1	1	1	1	1	1	1	1
TIGR01265	TIGR01265: tyr_nico_aTase: tyrosine/nicotianamine family aminotransferase	1	1	1	1	1	1	1	1	1	1	1	1	1	1	1	1	1	1	1	1	1	1	1	1	1	1	1	1	1	1	1	1	1	1	1	1	1	1	1	1	1	1	1	1	1	1	1	1
TIGR01277	TIGR01277: thiQ: thiamine ABC transporter, ATP-binding protein	1	1	1	1	1	1	1	1	1	1	1	1	1	1	1	1	1	1	1	1	1	1	1	1	1	1	1	1	1	1	1	1	1	1	1	1	1	1	1	1	1	1	1	1	1	1	1	1
TIGR01288	TIGR01288: nodI: nodulation ABC transporter NodI	1	1	1	1	1	1	1	1	1	1	1	1	1	1	1	1	1	1	1	1	1	1	1	1	1	1	1	1	1	1	1	1	1	1	1	1	1	1	1	1	1	1	1	1	1	1	1	1
TIGR01292	TIGR01292: TRX_reduct: thioredoxin-disulfide reductase	1	1	0	1	1	1	1	1	1	1	1	1	1	1	1	1	1	1	1	1	1	1	1	1	1	1	1	1	1	1	1	1	1	0	1	1	1	1	1	1	1	1	1	1	1	1	1	1
TIGR01296	TIGR01296: asd_B: aspartate-semialdehyde dehydrogenase	1	1	1	1	1	0	1	0	1	1	0	0	1	1	1	1	1	1	1	1	1	1	1	1	1	1	0	1	1	1	1	1	1	0	1	1	1	1	1	1	1	1	1	1	1	1	1	1
TIGR01302	TIGR01302: IMP_dehydrog: inosine-5'-monophosphate dehydrogenase	0	0	1	1	1	0	1	1	1	0	0	1	0	1	1	1	1	0	1	1	1	1	1	0	1	1	0	1	1	1	1	1	1	0	1	1	0	0	1	1	1	1	1	1	1	1	1	1
TIGR01303	TIGR01303: IMP_DH_rel_1: IMP dehydrogenase family protein	0	0	1	1	1	0	1	1	1	0	0	1	0	1	1	1	1	0	1	1	1	1	1	0	1	1	0	1	1	1	1	1	1	0	1	1	0	0	1	1	1	1	1	1	1	1	1	1
TIGR01316	TIGR01316: gltA: glutamate synthase (NADPH), homotetrameric	1	1	0	1	1	1	1	1	1	1	1	1	1	1	1	1	1	1	1	1	1	1	1	1	0	1	1	1	1	1	1	1	1	1	1	0	1	1	1	1	1	1	1	1	1	1	1	1
TIGR01317	TIGR01317: GOGAT_sm_gam: glutamate synthase, NADH/NADPH, small subunit	1	1	0	1	1	1	1	1	1	1	1	1	1	1	0	1	1	1	1	1	1	1	1	0	0	1	1	1	1	1	1	1	1	1	1	0	1	1	1	1	1	1	1	1	1	1	1	1
TIGR01318	TIGR01318: gltD_gamma_fam: glutamate synthase, small subunit	1	1	0	1	1	1	1	1	1	1	1	1	1	1	0	1	1	1	1	1	1	1	1	1	0	1	1	1	1	1	1	1	1	1	1	0	1	1	1	1	1	1	1	1	1	1	1	1
TIGR01324	TIGR01324: cysta_beta_ly_B: cystathionine beta-lyase	1	1	1	1	1	0	1	0	0	0	0	0	1	1	1	1	1	1	1	1	1	1	1	0	1	1	1	1	0	1	1	1	1	1	1	0	0	0	1	1	1	1	1	1	1	1	1	1
TIGR01325	TIGR01325: O_suc_HS_sulf: O-succinylhomoserine sulfhydrylase	1	1	1	1	1	0	1	0	0	1	1	0	1	1	1	1	1	1	1	1	1	1	1	0	1	1	1	1	0	1	1	1	1	1	1	0	0	0	1	1	1	1	1	1	1	1	1	1
TIGR01327	TIGR01327: PGDH: phosphoglycerate dehydrogenase	1	1	1	1	1	1	1	1	1	1	1	1	1	1	1	1	1	1	1	1	1	1	1	1	1	1	1	1	1	1	1	1	1	1	1	1	1	1	1	1	1	1	1	1	1	1	1	1
TIGR01328	TIGR01328: met_gam_lyase: methionine gamma-lyase	1	1	1	1	1	0	1	0	0	1	1	0	1	1	1	1	1	1	1	1	1	1	1	0	1	1	1	1	0	1	1	1	1	1	1	0	0	0	1	1	1	1	1	1	1	1	1	1
TIGR01329	TIGR01329: cysta_beta_ly_E: cystathionine beta-lyase	1	1	1	1	1	0	1	0	0	0	0	0	1	1	1	1	1	1	1	1	1	1	1	0	1	1	1	1	0	1	1	1	1	1	1	0	0	0	1	1	1	1	1	1	1	1	1	1
TIGR01331	TIGR01331: bisphos_cysQ: 3'(2'),5'-bisphosphate nucleotidase	1	1	1	1	1	1	1	0	1	0	1	1	1	1	1	1	1	1	1	1	1	1	1	1	1	1	1	1	1	1	1	1	1	1	1	1	0	1	1	1	1	1	1	1	1	1	1	1
TIGR01343	TIGR01343: hacA_fam: homoaconitate hydratase family protein	1	1	1	1	1	1	1	1	1	1	1	1	1	1	0	0	1	1	1	1	1	1	1	1	1	1	1	1	1	1	1	1	1	0	1	1	1	0	1	1	1	1	1	1	1	1	1	1
TIGR01347	TIGR01347: sucB: dihydrolipoyllysine-residue succinyltransferase, E2 component of oxoglutarate dehydrogenase (succinyl-transferring) complex	1	1	1	1	1	0	0	0	1	1	1	1	1	1	1	1	1	1	1	1	1	1	1	1	1	1	1	1	1	1	1	1	1	0	1	1	1	1	1	1	1	1	1	1	1	1	1	1
TIGR01348	TIGR01348: PDHac_trf_long: dihydrolipoyllysine-residue acetyltransferase	1	1	1	0	1	0	0	0	1	1	1	1	1	1	1	1	0	0	1	1	1	1	1	1	1	1	1	1	1	1	1	1	1	0	0	1	1	1	1	1	1	1	1	1	1	1	1	1
TIGR01349	TIGR01349: PDHac_trf_mito: pyruvate dehydrogenase complex dihydrolipoamide acetyltransferase	1	1	1	1	1	0	0	0	1	1	1	1	1	1	1	1	1	1	1	1	1	1	1	1	1	1	1	1	1	1	1	1	1	0	1	1	1	1	1	1	1	1	1	1	1	1	1	1
TIGR01350	TIGR01350: lipoamide_DH: dihydrolipoyl dehydrogenase	1	1	1	1	1	0	0	0	0	0	1	1	1	1	1	1	1	1	1	1	0	1	1	1	1	1	1	1	1	1	1	1	1	1	1	0	0	1	1	1	1	1	1	1	1	1	1	1
TIGR01351	TIGR01351: adk: adenylate kinase	1	1	1	1	1	1	1	1	1	1	1	1	1	1	1	1	1	1	1	1	1	1	1	0	1	1	0	1	1	1	0	0	1	0	1	1	0	1	1	1	1	1	1	1	1	1	1	1
TIGR01356	TIGR01356: aroA: 3-phosphoshikimate 1-carboxyvinyltransferase	1	1	1	1	1	1	1	0	0	0	0	1	1	1	1	1	1	1	1	1	1	1	1	1	1	1	1	1	1	1	1	1	1	1	1	1	1	1	1	1	1	1	1	1	1	1	1	1
TIGR01357	TIGR01357: aroB: 3-dehydroquinate synthase	0	0	1	1	1	1	1	1	1	1	0	1	1	0	0	1	0	1	1	1	1	1	1	0	1	1	0	1	1	1	1	1	1	1	1	1	1	1	1	1	1	1	1	1	1	1	1	1
TIGR01358	TIGR01358: DAHP_synth_II: 3-deoxy-7-phosphoheptulonate synthase	0	0	1	1	1	0	0	0	1	0	0	1	0	1	0	0	1	0	1	1	1	1	1	0	0	1	1	1	1	1	1	1	1	1	1	1	1	1	1	1	1	1	1	1	1	1	1	1
TIGR01359	TIGR01359: UMP_CMP_kin_fam: UMP-CMP kinase family	1	1	1	1	1	1	1	1	1	1	1	1	1	1	1	1	1	1	1	1	1	1	1	0	1	1	0	1	1	1	0	0	1	0	1	1	0	1	1	1	1	1	1	1	1	1	1	1
TIGR01360	TIGR01360: aden_kin_iso1: adenylate kinase	1	1	1	1	1	1	1	1	1	1	1	1	1	1	1	1	1	1	1	1	1	1	1	0	1	1	0	1	1	1	0	0	1	0	1	1	0	1	1	1	1	1	1	1	1	1	1	1
TIGR01361	TIGR01361: DAHP_synth_Bsub: phospho-2-dehydro-3-deoxyheptonate aldolase	1	1	1	1	1	1	1	1	0	0	0	1	1	1	1	1	1	1	1	1	1	1	1	1	1	1	0	1	1	1	1	1	1	1	1	1	0	0	1	1	1	1	1	1	1	1	1	1
TIGR01362	TIGR01362: KDO8P_synth: 3-deoxy-8-phosphooctulonate synthase	1	1	1	1	1	1	1	1	0	0	0	1	1	1	1	1	1	1	1	1	1	1	1	1	1	1	0	1	1	1	1	1	1	1	1	1	0	0	1	1	1	1	1	1	1	1	1	1
TIGR01367	TIGR01367: pyrE_Therm: orotate phosphoribosyltransferase	1	1	1	1	1	0	0	0	0	0	1	1	1	1	1	0	1	0	1	1	1	0	0	1	1	1	0	1	1	1	1	1	1	1	1	1	1	1	1	1	1	1	1	1	1	1	1	1
TIGR01368	TIGR01368: CPSaseIIsmall: carbamoyl-phosphate synthase, small subunit	1	1	1	0	1	1	1	0	0	0	1	1	1	1	0	0	1	1	1	1	1	1	1	1	1	1	1	1	1	1	1	1	1	1	0	1	0	1	1	1	1	1	1	1	1	1	1	1
TIGR01369	TIGR01369: CPSaseII_lrg: carbamoyl-phosphate synthase, large subunit	1	1	1	0	1	0	1	1	1	1	0	0	1	1	1	1	1	1	1	1	1	1	1	1	0	1	0	1	0	1	1	1	1	1	0	0	0	1	1	1	1	1	1	1	1	1	1	1
TIGR01380	TIGR01380: glut_syn: glutathione synthase	1	1	1	1	1	1	0	1	0	0	0	1	0	1	1	0	1	0	1	1	0	1	1	0	1	1	1	1	0	1	1	1	1	1	0	1	0	0	1	1	1	1	1	1	1	1	1	1
TIGR01386	TIGR01386: cztS_silS_copS: heavy metal sensor kinase	1	1	1	1	1	1	1	1	1	1	1	1	1	1	1	1	1	1	1	1	1	1	1	1	1	1	1	1	1	1	1	1	1	1	1	1	1	1	1	1	1	1	1	1	1	1	1	1
TIGR01387	TIGR01387: cztR_silR_copR: heavy metal response regulator	1	1	1	1	1	1	1	1	1	1	1	1	1	1	1	1	1	1	1	1	1	1	1	1	1	1	1	1	1	1	1	1	1	1	1	1	1	1	1	1	1	1	1	1	1	1	1	1
TIGR01391	TIGR01391: dnaG: DNA primase	1	1	1	0	1	0	1	0	0	0	0	1	0	1	1	0	1	1	1	1	0	1	1	0	0	1	0	1	0	0	1	1	1	0	1	1	0	1	1	1	1	1	1	1	1	1	1	1
TIGR01393	TIGR01393: lepA: GTP-binding protein LepA	1	1	1	0	1	1	0	0	0	0	1	0	1	1	0	0	1	1	1	1	1	1	1	1	1	1	1	1	1	1	1	1	1	0	1	0	0	0	1	1	1	1	1	1	1	1	1	1
TIGR01394	TIGR01394: TypA_BipA: GTP-binding protein TypA/BipA	1	1	1	0	1	1	0	0	0	0	1	0	1	1	0	0	1	1	1	1	1	1	1	1	1	1	1	1	1	1	1	1	1	1	1	1	0	0	1	1	1	1	1	1	1	1	1	1
TIGR01406	TIGR01406: dnaQ_proteo: DNA polymerase III, epsilon subunit	1	1	1	1	1	1	1	0	1	1	1	1	1	1	1	1	1	1	1	1	1	1	1	1	1	1	0	1	1	1	1	1	0	0	1	1	0	1	1	1	1	1	1	1	1	1	1	1
TIGR01410	TIGR01410: tatB: twin arginine-targeting protein translocase TatB	1	1	1	1	1	1	0	0	0	0	0	1	0	1	0	1	1	1	1	1	0	1	1	1	0	1	0	1	0	1	1	1	1	1	1	1	1	0	1	1	1	1	1	1	1	1	1	1
TIGR01411	TIGR01411: tatAE: twin arginine-targeting protein translocase, TatA/E family	1	1	1	1	1	1	0	0	0	0	0	1	0	1	0	1	1	1	1	1	0	1	1	1	0	1	1	1	1	1	1	1	1	1	1	1	1	0	1	1	1	1	1	1	1	1	1	1
TIGR01416	TIGR01416: Rieske_proteo: ubiquinol-cytochrome c reductase, iron-sulfur subunit	1	1	1	1	1	1	1	1	1	1	1	1	1	1	1	1	1	1	1	1	1	1	1	1	1	1	1	1	1	1	1	1	1	1	1	1	1	1	1	1	1	1	1	1	1	1	1	1
TIGR01421	TIGR01421: gluta_reduc_1: glutathione-disulfide reductase	1	1	1	1	1	0	0	0	0	0	1	1	1	1	1	1	1	1	1	1	0	1	1	1	1	1	1	1	1	1	1	1	1	1	1	0	0	1	1	1	1	1	1	1	1	1	1	1
TIGR01423	TIGR01423: trypano_reduc: trypanothione-disulfide reductase	1	1	1	1	1	0	0	0	0	0	1	1	1	1	1	1	1	1	1	1	0	1	1	1	1	1	1	1	1	1	1	1	1	1	1	0	0	1	1	1	1	1	1	1	1	1	1	1
TIGR01424	TIGR01424: gluta_reduc_2: glutathione-disulfide reductase	1	1	1	1	1	0	0	0	0	0	1	1	1	1	1	1	1	1	1	1	0	1	1	1	1	1	1	1	1	1	1	1	1	1	1	0	0	1	1	1	1	1	1	1	1	1	1	1
TIGR01425	TIGR01425: SRP54_euk: signal recognition particle protein SRP54	1	1	1	0	1	1	1	1	1	1	1	1	1	1	1	1	1	1	1	1	1	1	1	1	1	1	1	1	1	1	1	1	1	1	1	1	1	1	1	1	1	1	1	1	1	1	1	1
TIGR01436	TIGR01436: glu_cys_lig_pln: glutamate--cysteine ligase	1	1	1	1	1	1	0	1	0	0	0	1	0	1	1	0	1	0	1	1	0	1	0	0	1	1	0	1	0	1	1	1	1	1	0	1	0	0	1	1	1	1	1	1	1	1	1	1
TIGR01438	TIGR01438: TGR: thioredoxin and glutathione reductase	1	1	1	1	1	0	0	0	0	0	1	1	1	1	1	1	1	1	1	1	0	1	1	1	1	1	1	1	1	1	1	1	1	1	1	0	0	1	1	1	1	1	1	1	1	1	1	1
TIGR01449	TIGR01449: PGP_bact: phosphoglycolate phosphatase, bacterial	1	1	1	1	1	0	0	0	0	0	1	1	0	1	0	1	1	1	1	1	1	1	1	1	1	1	1	1	0	1	1	1	0	1	1	1	1	1	1	1	1	1	1	1	1	1	1	1
TIGR01455	TIGR01455: glmM: phosphoglucosamine mutase	1	1	1	1	1	1	1	1	0	0	1	1	1	1	0	1	1	0	1	1	1	1	1	1	1	1	1	1	1	1	1	1	1	1	1	1	1	0	1	1	1	1	1	1	1	1	1	1
TIGR01457	TIGR01457: HAD-SF-IIA-hyp2: HAD hydrolase, TIGR01457 family	0	0	1	1	1	1	0	0	1	0	1	1	0	0	1	1	1	1	1	1	0	1	1	1	1	1	0	1	1	1	1	1	1	1	1	1	0	0	1	1	1	1	1	1	1	1	1	1
TIGR01459	TIGR01459: HAD-SF-IIA-hyp4: HAD hydrolase, TIGR01459 family	0	0	1	1	1	1	0	0	1	0	1	1	0	0	1	1	1	1	1	1	0	1	1	1	1	1	0	1	1	1	1	1	1	1	1	1	0	0	1	1	1	1	1	1	1	1	1	1
TIGR01460	TIGR01460: HAD-SF-IIA: HAD hydrolase, family IIA	0	0	1	1	1	1	0	0	1	0	1	1	0	0	1	1	1	1	1	1	0	1	1	1	1	1	0	1	1	1	1	1	1	1	1	1	0	0	1	1	1	1	1	1	1	1	1	1
TIGR01461	TIGR01461: greB: transcription elongation factor GreB	1	1	1	1	1	1	1	1	1	1	1	1	1	1	1	1	1	1	1	1	1	1	1	1	1	1	0	1	1	1	1	0	1	1	1	1	1	0	1	1	1	1	1	1	1	1	1	1
TIGR01462	TIGR01462: greA: transcription elongation factor GreA	1	1	1	1	1	1	1	1	1	1	1	1	1	1	1	1	1	1	1	1	1	1	1	1	1	1	0	1	1	1	1	0	1	1	1	1	1	0	1	1	1	1	1	1	1	1	1	1
TIGR01473	TIGR01473: cyoE_ctaB: protoheme IX farnesyltransferase	1	1	1	1	1	1	0	0	1	1	0	1	1	1	0	1	1	1	1	1	1	1	1	1	0	1	0	1	1	1	1	1	1	1	1	0	1	1	1	1	1	1	1	1	1	1	1	1
TIGR01474	TIGR01474: ubiA_proteo: 4-hydroxybenzoate polyprenyl transferase	1	1	1	1	1	1	0	0	1	1	0	1	1	1	0	1	1	1	1	1	1	1	1	1	0	1	0	1	1	1	1	1	1	1	1	0	1	1	1	1	1	1	1	1	1	1	1	1
TIGR01475	TIGR01475: ubiA_other: putative 4-hydroxybenzoate polyprenyltransferase	1	1	1	1	1	0	0	0	0	0	0	1	0	1	0	1	1	0	1	1	1	1	1	1	0	1	0	1	1	1	1	1	1	1	1	0	1	1	1	1	1	1	1	1	1	1	1	1
TIGR01479	TIGR01479: GMP_PMI: mannose-1-phosphate guanylyltransferase/mannose-6-phosphate isomerase	1	1	1	1	1	1	1	0	1	1	0	1	1	1	1	0	1	1	0	1	1	1	1	1	1	1	0	1	1	1	1	1	1	1	1	1	0	1	1	1	1	1	1	1	1	1	0	1
TIGR01496	TIGR01496: DHPS: dihydropteroate synthase	1	1	0	1	1	1	0	1	1	1	1	1	1	1	0	1	1	0	1	1	0	1	1	1	1	1	1	1	1	1	1	0	1	1	1	1	1	1	1	1	1	1	1	1	1	1	1	1
TIGR01498	TIGR01498: folK: 2-amino-4-hydroxy-6-hydroxymethyldihydropteridine diphosphokinase	1	1	1	1	1	0	1	0	0	0	1	1	0	1	1	0	1	1	0	1	1	0	0	1	1	1	0	1	1	1	1	1	1	0	1	1	1	1	1	1	1	1	1	1	1	1	1	1
TIGR01500	TIGR01500: sepiapter_red: sepiapterin reductase	1	1	1	1	1	1	1	1	0	0	1	1	1	1	1	1	1	1	1	1	1	1	1	1	1	1	1	1	1	1	1	1	1	1	1	1	1	1	1	1	1	1	1	1	1	1	1	1
TIGR01505	TIGR01505: tartro_sem_red: 2-hydroxy-3-oxopropionate reductase	1	1	1	1	1	1	1	1	1	1	1	1	1	1	1	1	1	1	1	1	1	1	1	1	1	1	1	1	1	1	1	1	1	0	1	1	1	1	1	1	1	1	1	1	1	1	1	1
TIGR01509	TIGR01509: HAD-SF-IA-v3: HAD hydrolase, family IA, variant 3	1	1	1	0	1	1	0	0	0	0	1	1	1	1	0	1	1	1	1	1	1	1	1	1	1	1	0	1	1	1	1	1	0	0	1	1	1	1	1	1	1	1	1	1	1	1	1	1
TIGR01510	TIGR01510: coaD_prev_kdtB: pantetheine-phosphate adenylyltransferase	1	1	0	1	1	0	0	0	0	0	0	1	0	1	0	0	1	1	1	1	1	1	1	1	1	1	0	1	1	0	1	1	1	1	1	1	1	0	1	1	1	1	1	1	1	1	0	1
TIGR01532	TIGR01532: E4PD_g-proteo: erythrose-4-phosphate dehydrogenase	0	0	1	1	1	1	1	1	0	1	1	1	1	1	1	1	1	0	1	1	1	1	1	1	1	1	1	1	1	1	0	0	1	1	1	1	1	0	1	1	1	1	1	1	1	1	1	1
TIGR01534	TIGR01534: GAPDH-I: glyceraldehyde-3-phosphate dehydrogenase, type I	0	0	1	1	1	1	1	1	0	1	1	1	1	1	1	1	1	0	1	1	1	1	1	1	1	1	1	1	1	1	0	0	1	1	1	1	1	0	1	1	1	1	1	1	1	1	1	1
TIGR01574	TIGR01574: miaB-methiolase: tRNA-i(6)A37 thiotransferase enzyme MiaB	1	1	1	1	1	0	0	1	0	0	0	1	0	1	1	1	1	1	1	1	1	1	1	1	1	1	1	1	1	1	1	1	1	1	1	1	1	1	1	1	1	1	1	1	1	1	1	1
TIGR01578	TIGR01578: MiaB-like-B: MiaB-like tRNA modifying enzyme, archaeal-type	1	1	1	1	1	0	0	1	0	0	0	1	0	1	1	1	1	1	1	1	1	1	1	1	1	1	1	1	1	1	1	1	1	1	1	1	1	1	1	1	1	1	1	1	1	1	1	1
TIGR01579	TIGR01579: MiaB-like-C: MiaB-like tRNA modifying enzyme	1	1	1	1	1	0	0	1	0	0	0	1	0	1	1	1	1	1	1	1	1	1	1	1	1	1	1	1	1	1	1	1	1	1	1	1	1	1	1	1	1	1	1	1	1	1	1	1
TIGR01621	TIGR01621: RluA-like: pseudouridine synthase Rlu family protein, TIGR01621	1	1	1	1	1	0	1	1	1	1	0	1	1	1	0	1	1	1	1	1	1	1	1	1	1	1	1	1	1	1	1	1	1	1	1	1	1	0	1	1	1	1	1	1	1	1	1	1
TIGR01632	TIGR01632: L11_bact: ribosomal protein L11	1	1	1	1	1	1	1	1	0	0	1	1	0	1	1	1	1	0	1	1	1	1	0	0	1	1	1	1	0	1	1	1	1	1	1	0	1	0	1	1	1	1	1	1	1	1	1	1
TIGR01650	TIGR01650: PD_CobS: cobaltochelatase, CobS subunit	1	1	1	1	1	1	1	1	1	1	0	1	1	1	1	1	0	1	1	1	1	1	1	1	1	1	0	1	1	1	1	1	1	0	1	1	1	1	1	1	1	1	1	1	1	1	1	1
TIGR01651	TIGR01651: CobT: cobaltochelatase, CobT subunit	1	1	1	1	1	1	1	0	1	0	0	1	0	1	1	1	0	1	1	1	1	1	1	1	1	1	0	1	1	1	1	1	1	0	1	1	1	0	1	1	1	1	1	1	1	1	1	1
TIGR01683	TIGR01683: thiS: thiamine biosynthesis protein ThiS	1	0	1	1	1	0	1	0	1	0	0	1	0	1	1	0	1	1	1	1	1	1	1	1	1	1	0	1	1	1	1	1	0	0	1	0	0	1	1	1	1	1	1	1	1	1	1	1
TIGR01692	TIGR01692: HIBADH: 3-hydroxyisobutyrate dehydrogenase	1	1	1	1	1	1	1	1	1	1	1	1	1	1	1	1	1	1	1	1	1	1	1	1	1	1	1	1	1	1	1	1	1	0	1	1	1	1	1	1	1	1	1	1	1	1	1	1
TIGR01695	TIGR01695: mviN: integral membrane protein MviN	1	1	1	1	1	0	1	1	0	1	1	1	1	1	1	0	1	0	1	1	1	1	1	1	1	1	0	1	0	1	1	1	1	1	1	1	0	1	1	1	1	1	1	1	1	1	1	1
TIGR01722	TIGR01722: MMSDH: methylmalonate-semialdehyde dehydrogenase (acylating)	1	1	1	1	1	1	1	1	1	1	0	1	1	1	1	1	1	1	1	1	1	1	1	1	1	1	1	1	1	1	1	1	1	1	1	1	1	1	1	1	1	1	1	1	1	1	1	1
TIGR01733	TIGR01733: AA-adenyl-dom: amino acid adenylation domain	1	1	1	1	1	1	1	1	1	1	1	1	1	0	1	1	1	1	1	1	1	1	1	1	1	1	1	1	1	1	1	1	1	0	1	1	1	1	1	1	1	1	1	1	1	1	1	1
TIGR01736	TIGR01736: FGAM_synth_II: phosphoribosylformylglycinamidine synthase II	1	1	1	1	1	1	1	1	1	1	1	1	1	1	1	1	1	0	0	1	1	1	0	0	0	1	1	1	1	1	1	1	1	0	0	0	0	1	1	1	1	1	1	1	1	1	1	1
TIGR01737	TIGR01737: FGAM_synth_I: phosphoribosylformylglycinamidine synthase I	1	1	1	1	1	1	1	1	1	1	1	1	1	1	1	1	1	0	0	1	1	1	0	0	0	1	0	1	1	1	1	1	1	0	0	0	0	0	1	1	1	1	1	1	1	1	1	1
TIGR01749	TIGR01749: fabA: beta-hydroxyacyl-(acyl-carrier-protein) dehydratase FabA	1	1	1	1	1	1	1	0	0	0	0	0	0	1	0	0	1	0	1	1	1	1	1	1	1	1	1	1	1	1	1	1	1	0	1	1	1	1	1	1	1	1	1	1	1	1	1	1
TIGR01750	TIGR01750: fabZ: beta-hydroxyacyl-(acyl-carrier-protein) dehydratase FabZ	1	1	1	1	1	1	1	0	0	1	0	1	0	1	1	0	1	1	1	1	1	1	1	1	1	1	1	1	1	1	1	1	1	0	1	1	1	1	1	1	1	1	1	1	1	1	1	1
TIGR01758	TIGR01758: MDH_euk_cyt: malate dehydrogenase, NAD-dependent	1	1	1	1	1	1	1	1	1	1	1	1	1	1	1	1	1	1	1	1	1	1	1	1	1	1	0	1	1	1	1	1	1	1	1	0	0	0	1	1	1	1	1	1	1	1	1	1
TIGR01759	TIGR01759: MalateDH-SF1: malate dehydrogenase	1	1	1	1	1	1	1	1	1	1	1	1	1	1	1	1	1	1	1	1	1	1	1	1	1	1	0	1	1	1	1	1	1	1	1	0	0	0	1	1	1	1	1	1	1	1	1	1
TIGR01763	TIGR01763: MalateDH_bact: malate dehydrogenase, NAD-dependent	1	1	1	1	1	1	1	1	1	1	1	1	1	1	1	1	1	1	1	1	1	1	1	1	1	1	0	1	1	1	1	1	1	1	1	0	0	0	1	1	1	1	1	1	1	1	1	1
TIGR01770	TIGR01770: NDH_I_N: proton-translocating NADH-quinone oxidoreductase, chain N	1	1	1	1	1	1	1	1	1	1	1	1	1	0	1	1	1	1	1	1	1	1	1	1	1	1	0	1	1	1	1	1	1	1	1	1	1	1	1	1	1	1	1	1	1	1	1	1
TIGR01771	TIGR01771: L-LDH-NAD: L-lactate dehydrogenase	1	1	1	1	1	1	1	1	1	1	1	1	1	1	1	1	1	1	1	1	1	1	1	1	1	1	0	1	1	1	1	1	1	1	1	0	0	0	1	1	1	1	1	1	1	1	1	1
TIGR01772	TIGR01772: MDH_euk_gproteo: malate dehydrogenase, NAD-dependent	1	1	1	1	1	1	1	1	1	1	1	1	1	1	1	1	1	1	1	1	1	1	1	1	1	1	0	1	1	1	1	1	1	1	1	0	0	0	1	1	1	1	1	1	1	1	1	1
TIGR01780	TIGR01780: SSADH: succinate-semialdehyde dehydrogenase	1	1	1	1	1	1	1	1	1	1	0	1	1	1	1	1	1	1	1	1	1	1	1	1	1	1	1	1	1	1	1	1	1	1	1	1	1	1	1	1	1	1	1	1	1	1	1	1
TIGR01793	TIGR01793: cit_synth_euk: citrate (Si)-synthase, eukaryotic	1	1	1	1	1	1	0	1	1	1	1	1	1	1	0	0	1	0	1	1	1	1	1	1	1	1	1	1	1	1	1	1	1	0	0	0	1	1	1	1	1	1	1	1	1	1	1	1
TIGR01798	TIGR01798: cit_synth_I: citrate (Si)-synthase	1	1	1	1	1	1	0	1	1	1	1	1	1	1	0	0	1	0	1	1	1	1	1	1	1	1	1	1	1	1	1	1	1	0	0	0	1	1	1	1	1	1	1	1	1	1	1	1
TIGR01800	TIGR01800: cit_synth_II: 2-methylcitrate synthase/citrate synthase II	1	1	1	1	1	1	0	1	1	1	1	1	1	1	0	0	1	0	1	1	1	1	1	1	1	1	1	1	1	1	1	1	1	0	0	0	1	1	1	1	1	1	1	1	1	1	1	1
TIGR01803	TIGR01803: CM-like: chorismate mutase related enzymes	1	1	1	1	1	0	0	1	1	0	0	1	0	1	1	0	1	1	1	1	1	0	0	1	1	1	0	1	1	1	1	0	1	1	1	0	0	0	1	1	1	1	1	1	1	1	0	1
TIGR01804	TIGR01804: BADH: betaine aldehyde dehydrogenase	1	1	1	1	1	1	1	1	1	1	0	1	1	1	1	1	1	1	1	1	1	1	1	1	1	1	1	1	1	1	1	1	1	1	1	1	1	1	1	1	1	1	1	1	1	1	1	1
TIGR01809	TIGR01809: Shik-DH-AROM: shikimate-5-dehydrogenase	1	1	1	1	1	1	1	1	1	1	1	1	1	1	1	0	1	1	1	1	1	1	1	0	1	1	1	1	1	1	1	1	0	0	1	0	0	0	1	1	1	1	1	1	1	1	1	1
TIGR01811	TIGR01811: sdhA_Bsu: succinate dehydrogenase or fumarate reductase, flavoprotein subunit	1	1	1	1	1	1	1	1	1	1	1	0	1	1	1	1	1	1	1	1	0	1	1	1	1	1	1	1	1	1	1	1	1	0	1	1	1	1	1	1	1	1	1	1	1	1	1	1
TIGR01812	TIGR01812: sdhA_frdA_Gneg: succinate dehydrogenase or fumarate reductase, flavoprotein subunit	1	1	1	1	1	1	1	1	1	1	1	0	1	1	1	1	1	1	1	1	0	1	1	1	1	1	1	1	1	1	1	1	1	0	1	1	1	1	1	1	1	1	1	1	1	1	1	1
TIGR01816	TIGR01816: sdhA_forward: succinate dehydrogenase, flavoprotein subunit	1	1	1	1	1	1	1	1	1	1	1	0	1	1	1	1	1	1	1	1	0	1	1	1	1	1	1	1	1	1	1	1	1	0	1	1	1	1	1	1	1	1	1	1	1	1	1	1
TIGR01818	TIGR01818: ntrC: nitrogen regulation protein NR(I)	0	0	1	1	1	1	1	1	1	1	1	1	1	1	1	0	1	1	1	1	1	1	1	1	1	1	0	1	1	1	1	1	1	0	1	1	0	1	1	1	1	1	1	1	1	1	0	1
TIGR01820	TIGR01820: TrpE-arch: anthranilate synthase component I	0	0	1	1	1	0	0	1	1	0	0	1	0	1	1	0	1	1	1	1	1	1	1	1	1	1	0	1	1	1	1	1	1	1	1	1	0	0	1	1	1	1	1	1	1	1	1	1
TIGR01822	TIGR01822: 2am3keto_CoA: 2-amino-3-ketobutyrate coenzyme A ligase	1	1	1	1	1	0	0	1	0	0	0	0	1	1	1	0	1	1	0	1	1	0	0	0	1	1	1	1	1	1	1	1	1	0	1	0	0	0	1	1	1	1	1	1	1	1	1	1
TIGR01823	TIGR01823: PabB-fungal: aminodeoxychorismate synthase	0	0	1	1	1	0	0	1	1	0	0	1	0	1	1	0	1	1	1	1	0	1	1	1	1	1	0	1	0	1	1	1	1	0	1	1	0	0	1	1	1	1	1	1	1	1	1	1
TIGR01824	TIGR01824: PabB-clade2: aminodeoxychorismate synthase, component I	0	0	1	1	1	0	0	1	1	0	0	1	0	1	1	0	1	1	1	1	1	1	1	1	1	1	1	1	1	1	1	1	1	1	1	1	0	0	1	1	1	1	1	1	1	1	1	1
TIGR01829	TIGR01829: AcAcCoA_reduct: acetoacetyl-CoA reductase	1	1	1	1	1	1	1	1	1	1	1	1	1	1	1	1	1	1	1	1	1	1	1	1	1	1	1	1	1	1	1	1	1	1	1	1	1	1	1	1	1	1	1	1	1	1	1	1
TIGR01830	TIGR01830: 3oxo_ACP_reduc: 3-oxoacyl-acyl-carrier-protein reductase	1	1	1	1	1	1	1	1	1	1	1	1	1	1	1	1	1	1	1	1	1	1	1	1	1	1	1	1	1	1	1	1	1	1	1	1	1	1	1	1	1	1	1	1	1	1	1	1
TIGR01831	TIGR01831: fabG_rel: putative 3-oxoacyl-(acyl-carrier-protein) reductase	1	1	1	1	1	1	1	1	1	1	1	1	1	1	1	1	1	1	1	1	1	1	1	1	1	1	1	1	1	1	1	1	1	1	1	1	1	1	1	1	1	1	1	1	1	1	1	1
TIGR01832	TIGR01832: kduD: 2-deoxy-D-gluconate 3-dehydrogenase	1	1	1	1	1	1	1	1	1	1	1	1	1	1	1	1	1	1	1	1	1	1	1	1	1	1	1	1	1	1	1	1	1	1	1	1	1	1	1	1	1	1	1	1	1	1	1	1
TIGR01844	TIGR01844: type_I_sec_TolC: type I secretion outer membrane protein, TolC family	1	1	1	1	1	1	0	0	1	0	1	1	0	1	1	1	1	1	1	1	1	1	1	1	1	1	0	1	1	1	1	1	1	0	1	1	0	1	1	1	1	1	1	1	1	1	1	1
TIGR01845	TIGR01845: outer_NodT: efflux transporter, outer membrane factor (OMF) lipoprotein, NodT family	1	1	1	1	1	1	0	0	1	0	1	1	0	1	1	1	1	1	1	1	1	1	1	1	1	1	0	1	1	1	1	1	1	0	1	1	0	1	1	1	1	1	1	1	1	1	1	1
TIGR01850	TIGR01850: argC: N-acetyl-gamma-glutamyl-phosphate reductase	1	1	1	1	1	0	1	0	1	0	0	1	1	1	1	1	1	1	1	1	1	1	1	1	1	1	1	1	1	1	1	0	1	0	1	1	1	0	1	1	1	1	1	1	1	1	0	1
TIGR01851	TIGR01851: argC_other: N-acetyl-gamma-glutamyl-phosphate reductase	1	1	1	1	1	0	1	0	0	0	0	1	0	0	0	0	1	1	1	1	1	1	1	1	1	1	1	1	1	1	1	0	1	0	1	1	1	0	1	1	1	1	1	1	1	1	0	1
TIGR01852	TIGR01852: lipid_A_lpxA: acyl-acyl-carrier-protein-UDP-N-acetylglucosamine O-acyltransferase	1	1	1	1	1	1	0	0	0	1	0	1	0	1	1	0	1	1	1	1	1	1	1	1	1	1	0	1	1	1	1	1	1	0	0	1	1	0	1	1	1	1	1	1	1	1	1	1
TIGR01853	TIGR01853: lipid_A_lpxD: UDP-3-O-3-hydroxymyristoyl glucosamine N-acyltransferase	1	1	1	1	0	0	0	0	0	0	0	1	0	1	1	0	1	1	1	1	1	1	1	1	1	1	0	1	1	1	1	1	1	0	0	1	1	0	1	1	1	1	1	1	1	1	1	1
TIGR01855	TIGR01855: IMP_synth_hisH: imidazole glycerol phosphate synthase, glutamine amidotransferase subunit	1	1	1	1	1	1	0	1	1	1	0	1	0	1	1	0	1	0	1	1	1	1	1	1	1	1	1	1	1	1	1	1	1	1	1	1	0	0	1	1	1	1	1	1	1	1	1	1
TIGR01857	TIGR01857: FGAM-synthase: phosphoribosylformylglycinamidine synthase	1	1	1	0	1	1	1	0	1	1	1	0	1	1	1	1	1	0	0	1	1	1	0	0	0	1	1	1	0	1	1	1	1	0	0	0	0	1	1	1	1	1	1	1	1	1	0	1
TIGR01880	TIGR01880: Ac-peptdase-euk: N-acyl-L-amino-acid amidohydrolase	1	1	1	1	0	1	0	0	0	0	0	1	0	1	0	0	1	1	1	1	1	1	1	1	1	1	0	1	1	1	1	1	1	1	1	1	1	1	1	1	1	1	1	1	1	1	1	1
TIGR01885	TIGR01885: Orn_aminotrans: ornithine--oxo-acid transaminase	1	1	1	1	1	1	1	1	1	0	1	1	1	1	1	1	1	1	1	1	1	1	1	1	1	1	1	1	1	1	1	1	1	1	1	1	1	1	1	1	1	1	1	1	1	1	1	1
TIGR01890	TIGR01890: N-Ac-Glu-synth: amino-acid N-acetyltransferase	1	1	1	1	0	1	1	1	0	0	0	1	1	1	0	1	1	1	1	1	1	1	1	1	1	1	0	1	1	1	1	1	1	0	1	1	1	0	1	1	1	1	1	1	1	1	1	1
TIGR01891	TIGR01891: amidohydrolases: amidohydrolase	1	1	1	1	0	1	0	0	0	0	0	1	0	1	0	0	1	1	1	0	1	1	1	1	1	1	0	1	1	1	1	1	1	0	1	0	1	1	1	1	1	1	1	1	1	1	1	1
TIGR01892	TIGR01892: AcOrn-deacetyl: acetylornithine deacetylase (ArgE)	1	1	1	1	0	1	0	0	0	0	0	1	0	1	0	0	1	1	1	1	1	1	1	1	1	1	0	1	1	1	1	1	1	1	1	1	1	1	1	1	1	1	1	1	1	1	1	1
TIGR01900	TIGR01900: dapE-gram_pos: succinyl-diaminopimelate desuccinylase	1	1	1	1	0	1	0	0	0	0	0	1	0	1	0	0	1	1	1	1	1	1	1	1	1	1	0	1	1	1	1	1	1	1	1	1	1	1	1	1	1	1	1	1	1	1	1	1
TIGR01902	TIGR01902: dapE-lys-deAc: N-acetyl-ornithine/N-acetyl-lysine deacetylase	1	1	1	1	0	1	0	0	0	0	0	1	0	1	0	0	1	1	1	1	1	1	1	1	1	1	0	1	1	1	1	1	1	1	1	1	1	1	1	1	1	1	1	1	1	1	1	1
TIGR01910	TIGR01910: DapE-ArgE: peptidase, ArgE/DapE family	1	1	1	1	0	1	0	0	0	0	0	1	0	1	0	0	1	1	1	1	1	1	1	1	1	1	0	1	1	1	1	1	1	1	1	1	1	1	1	1	1	1	1	1	1	1	1	1
TIGR01912	TIGR01912: TatC-Arch: Sec-independent protein translocase TatC	1	1	1	1	1	1	0	0	0	0	0	1	1	1	1	1	1	1	1	1	1	1	1	1	0	1	0	1	1	0	1	1	1	1	1	1	1	0	1	1	1	1	1	1	1	1	1	1
TIGR01923	TIGR01923: menE: O-succinylbenzoate-CoA ligase	1	1	1	1	1	1	1	1	1	1	1	1	1	0	1	1	1	1	1	1	1	1	1	1	1	1	1	1	1	1	1	1	1	0	1	1	1	1	1	1	1	1	1	1	1	1	1	1
TIGR01934	TIGR01934: MenG_MenH_UbiE: ubiquinone/menaquinone biosynthesis methyltransferase	1	1	1	1	1	1	1	1	0	1	1	1	1	1	1	1	1	0	1	1	1	1	1	1	1	1	1	1	1	1	1	1	1	1	1	1	1	1	1	1	1	1	1	1	1	1	1	1
TIGR01951	TIGR01951: nusB: transcription antitermination factor NusB	1	1	1	1	1	0	1	1	0	0	0	1	1	1	1	1	1	1	1	1	1	0	0	1	1	1	1	1	1	1	0	0	1	0	1	1	0	1	1	1	1	1	1	1	1	1	0	1
TIGR01953	TIGR01953: NusA: transcription termination factor NusA	1	1	1	1	1	1	1	1	0	0	1	1	1	1	1	0	1	1	1	1	1	1	1	1	1	1	1	1	1	1	1	1	1	0	1	1	0	1	1	1	1	1	1	1	1	1	1	1
TIGR01955	TIGR01955: RfaH: transcriptional activator RfaH	1	1	1	1	1	1	1	1	0	0	1	1	0	1	1	1	1	0	1	1	1	1	0	0	1	1	1	1	1	0	1	1	1	0	1	0	1	0	1	1	1	1	1	1	1	1	1	1
TIGR01960	TIGR01960: ndhF3_CO2: NAD(P)H dehydrogenase, subunit NdhF3 family	1	1	1	1	1	1	1	1	1	1	1	1	1	0	0	1	1	1	1	1	1	1	1	1	1	1	0	1	1	1	1	1	1	1	1	1	1	1	1	1	1	1	1	1	1	1	1	1
TIGR01963	TIGR01963: PHB_DH: 3-hydroxybutyrate dehydrogenase	1	1	1	1	1	1	1	1	1	1	1	1	1	1	1	1	1	1	1	1	1	1	1	1	1	1	1	1	1	1	1	1	1	1	1	1	1	1	1	1	1	1	1	1	1	1	1	1
TIGR01972	TIGR01972: NDH_I_M: proton-translocating NADH-quinone oxidoreductase, chain M	1	1	1	1	1	1	1	1	1	1	1	1	1	0	1	1	1	1	1	1	1	1	1	1	1	1	0	1	1	1	1	1	1	1	1	1	1	1	1	1	1	1	1	1	1	1	1	1
TIGR01974	TIGR01974: NDH_I_L: proton-translocating NADH-quinone oxidoreductase, chain L	1	1	1	1	1	1	1	1	1	1	1	1	1	0	1	1	1	1	1	1	1	1	1	1	1	1	0	1	1	1	1	1	1	1	1	1	1	1	1	1	1	1	1	1	1	1	1	1
TIGR01976	TIGR01976: am_tr_V_VC1184: cysteine desulfurase family protein	1	1	1	1	1	0	0	1	0	0	0	0	1	0	0	1	1	1	1	1	1	1	0	1	1	1	1	1	0	1	1	1	1	1	1	0	0	1	1	1	1	1	1	1	1	1	1	1
TIGR01977	TIGR01977: am_tr_V_EF2568: cysteine desulfurase family protein	1	1	1	1	1	0	0	1	0	0	0	0	1	0	0	1	1	1	1	1	1	1	0	1	1	1	1	1	0	1	1	1	1	1	1	0	0	1	1	1	1	1	1	1	1	1	1	1
TIGR01978	TIGR01978: sufC: FeS assembly ATPase SufC	1	1	1	1	1	1	1	1	1	1	1	1	1	1	1	1	1	1	1	1	1	1	1	1	1	1	1	1	1	1	1	1	1	1	1	1	1	1	1	1	1	1	1	1	1	1	1	1
TIGR01979	TIGR01979: sufS: cysteine desulfurase, SufS family	1	1	1	1	1	0	0	1	0	0	0	0	1	0	0	1	1	1	1	1	1	1	1	1	1	1	1	1	0	1	1	1	1	1	1	0	0	1	1	1	1	1	1	1	1	1	1	1
TIGR01980	TIGR01980: sufB: FeS assembly protein SufB	1	1	1	1	1	0	0	1	0	0	0	0	0	0	0	1	1	1	1	1	1	1	1	1	1	1	0	1	1	1	1	1	1	1	1	0	0	0	1	1	1	1	1	1	1	1	1	1
TIGR01981	TIGR01981: sufD: FeS assembly protein SufD	1	1	1	1	1	0	0	1	0	0	0	0	0	0	0	1	1	1	1	1	1	1	1	1	1	1	1	1	1	1	1	1	1	1	1	0	0	0	1	1	1	1	1	1	1	1	1	1
TIGR01982	TIGR01982: UbiB: 2-polyprenylphenol 6-hydroxylase	1	1	1	1	1	0	1	0	0	1	1	1	1	1	1	1	1	0	1	1	1	1	1	1	1	1	1	1	1	1	1	1	1	0	1	1	1	1	1	1	1	1	1	1	1	1	1	1
TIGR01984	TIGR01984: UbiH: 2-polyprenyl-6-methoxyphenol 4-hydroxylase	1	1	0	1	1	1	0	1	0	0	0	1	0	1	1	1	1	1	1	1	1	1	1	1	1	1	1	1	0	1	1	1	0	1	1	1	0	0	1	1	1	1	1	1	1	1	1	1
TIGR01988	TIGR01988: Ubi-OHases: ubiquinone biosynthesis hydroxylase, UbiH/UbiF/VisC/COQ6 family	1	1	0	1	1	1	0	1	0	0	0	1	0	1	1	1	1	1	1	1	1	1	1	1	1	1	1	1	0	1	1	1	0	1	1	1	0	0	1	1	1	1	1	1	1	1	1	1
TIGR01990	TIGR01990: bPGM: beta-phosphoglucomutase	1	1	1	1	1	0	0	0	0	0	1	1	0	1	0	1	1	1	1	1	1	1	1	1	1	1	1	1	0	1	1	1	0	1	0	1	1	1	1	1	1	1	1	1	1	1	1	1
TIGR01993	TIGR01993: Pyr-5-nucltdase: pyrimidine 5'-nucleotidase	1	1	1	1	0	1	0	0	0	0	0	1	1	1	0	1	1	1	1	1	1	1	1	1	1	1	1	1	1	1	1	1	1	0	1	1	1	1	1	1	1	1	1	1	1	1	1	1
TIGR01994	TIGR01994: SUF_scaf_2: SUF system FeS assembly protein, NifU family	1	1	1	1	1	1	1	1	0	0	0	1	1	1	0	0	1	1	1	1	1	1	1	1	1	1	1	1	1	1	1	1	1	1	1	1	1	1	1	1	1	1	1	1	1	1	1	1
TIGR01997	TIGR01997: sufA_proteo: FeS assembly scaffold SufA	1	1	1	1	1	1	1	0	0	1	0	1	1	1	1	0	1	1	1	1	1	1	1	1	1	1	1	1	1	1	1	1	1	1	1	1	1	1	1	1	1	1	1	1	1	1	1	1
TIGR01999	TIGR01999: iscU: FeS cluster assembly scaffold IscU	1	1	0	1	1	0	0	0	0	0	0	0	1	0	0	0	1	1	1	1	1	1	0	1	1	1	1	1	1	1	1	1	1	1	1	1	0	1	1	1	1	1	1	1	1	1	1	1
TIGR02006	TIGR02006: IscS: cysteine desulfurase IscS	1	1	1	1	1	0	0	1	0	0	0	0	1	0	0	1	1	1	1	1	1	1	0	1	1	1	1	1	0	1	1	1	1	1	1	0	0	1	1	1	1	1	1	1	1	1	1	1
TIGR02007	TIGR02007: fdx_isc: ferredoxin, 2Fe-2S type, ISC system	1	1	1	1	1	1	1	0	1	1	0	1	1	0	1	0	1	1	1	1	1	1	1	1	1	1	0	1	1	1	1	1	1	0	0	1	1	1	1	1	1	1	1	1	1	1	1	1
TIGR02009	TIGR02009: PGMB-YQAB-SF: beta-phosphoglucomutase family hydrolase	1	1	1	1	1	1	0	0	0	0	1	1	0	1	0	1	1	1	1	1	1	1	1	1	1	1	1	1	0	1	1	1	0	1	0	1	1	1	1	1	1	1	1	1	1	1	1	1
TIGR02011	TIGR02011: IscA: iron-sulfur cluster assembly protein IscA	1	1	1	1	1	1	1	0	0	1	0	1	1	1	1	0	1	1	1	1	1	1	1	1	1	1	1	1	1	1	1	1	1	1	1	1	1	1	1	1	1	1	1	1	1	1	1	1
TIGR02012	TIGR02012: tigrfam_recA: protein RecA	1	1	1	1	1	0	0	0	1	0	1	1	1	1	1	1	1	1	1	1	1	1	1	1	1	1	1	1	1	1	1	1	1	0	1	1	0	1	1	1	1	1	1	1	1	1	1	1
TIGR02027	TIGR02027: rpoA: DNA-directed RNA polymerase, alpha subunit	1	1	1	1	1	0	1	1	1	1	1	1	1	1	1	0	1	1	1	1	1	1	1	1	0	1	1	1	1	1	1	0	1	0	1	1	1	1	1	1	1	1	1	1	1	1	1	1
TIGR02033	TIGR02033: D-hydantoinase: dihydropyrimidinase	1	1	1	1	1	1	1	1	0	1	1	1	1	1	1	1	1	1	1	1	1	1	1	1	1	1	1	1	1	1	1	1	1	1	1	1	1	1	1	1	1	1	1	1	1	1	1	1
TIGR02034	TIGR02034: CysN: sulfate adenylyltransferase, large subunit	1	1	1	1	1	0	1	1	0	0	1	1	0	1	1	1	1	0	1	1	1	1	0	1	1	1	1	1	1	1	1	1	1	0	0	0	1	0	1	1	1	1	1	1	1	1	1	1
TIGR02037	TIGR02037: degP_htrA_DO: peptidase Do	0	0	0	1	1	0	0	0	0	0	0	1	0	1	1	1	1	1	1	1	1	1	1	1	1	1	0	1	1	1	1	1	1	1	0	1	1	0	1	1	1	1	1	1	1	1	1	1
TIGR02038	TIGR02038: protease_degS: periplasmic serine peptidase DegS	0	0	0	1	1	0	0	0	0	0	0	1	0	1	1	1	1	1	1	1	1	1	1	1	1	1	0	1	1	1	1	1	1	1	0	1	1	0	1	1	1	1	1	1	1	1	1	1
TIGR02053	TIGR02053: MerA: mercuric reductase	1	1	1	1	1	0	0	0	0	0	1	1	1	1	1	1	1	1	1	1	0	1	1	1	1	1	1	1	1	1	1	1	1	1	1	0	0	1	1	1	1	1	1	1	1	1	1	1
TIGR02067	TIGR02067: his_9_HisN: histidinol-phosphatase	1	1	1	1	1	1	1	0	1	0	1	1	1	1	1	1	1	1	1	1	1	1	1	1	1	1	1	1	1	1	1	1	1	1	1	1	0	1	1	1	1	1	1	1	1	1	1	1
TIGR02072	TIGR02072: BioC: biotin biosynthesis protein BioC	1	1	1	1	1	1	1	1	0	1	1	1	1	1	1	1	1	0	1	1	1	1	0	1	1	1	0	1	1	1	1	1	0	0	1	1	1	1	1	1	1	1	1	1	1	1	1	1
TIGR02080	TIGR02080: O_succ_thio_ly: O-succinylhomoserine (thiol)-lyase	1	1	1	1	1	0	1	0	0	0	0	0	1	1	1	1	1	1	1	1	1	1	1	0	1	1	1	1	0	1	1	1	1	1	1	0	0	0	1	1	1	1	1	1	1	1	1	1
TIGR02081	TIGR02081: metW: methionine biosynthesis protein MetW	1	1	1	1	0	1	1	0	1	1	1	1	1	0	1	1	1	1	1	1	0	1	1	1	1	1	1	1	1	1	1	1	1	1	1	1	0	1	1	1	1	1	1	1	1	1	1	1
TIGR02083	TIGR02083: LEU2: 3-isopropylmalate dehydratase, large subunit	1	1	1	1	1	1	1	1	1	1	1	1	1	1	0	0	1	1	1	1	1	1	1	1	1	1	1	1	1	1	1	1	1	0	1	1	1	0	1	1	1	1	1	1	1	1	1	1
TIGR02084	TIGR02084: leud: 3-isopropylmalate dehydratase, small subunit	1	1	0	1	1	1	1	1	1	1	1	1	1	1	1	1	1	1	1	1	1	1	1	1	1	1	1	1	0	1	1	1	1	0	1	1	1	0	1	1	1	1	1	1	1	1	1	1
TIGR02086	TIGR02086: IPMI_arch: 3-isopropylmalate dehydratase, large subunit	1	1	1	1	1	1	1	1	1	1	1	1	1	1	0	0	1	1	1	1	1	1	1	1	1	1	1	1	1	1	1	1	1	0	1	1	1	0	1	1	1	1	1	1	1	1	1	1
TIGR02087	TIGR02087: LEUD_arch: 3-isopropylmalate dehydratase, small subunit	1	1	0	1	1	1	1	1	1	1	1	1	1	1	1	1	1	1	1	1	1	1	1	1	1	1	1	1	0	1	1	1	1	0	1	1	1	1	1	1	1	1	1	1	1	1	1	1
TIGR02088	TIGR02088: LEU3_arch: isopropylmalate/isohomocitrate dehydrogenases	1	1	1	1	1	1	1	1	1	1	1	1	1	0	1	1	1	1	1	1	1	1	1	1	1	1	1	1	1	1	1	1	1	0	1	1	1	1	1	1	1	1	1	1	1	1	1	1
TIGR02089	TIGR02089: TTC: tartrate dehydrogenase	0	0	1	1	1	1	1	0	1	1	1	1	1	0	1	1	1	1	1	1	1	1	1	1	1	1	1	1	1	1	1	1	1	0	1	1	1	1	1	1	1	1	1	1	1	1	1	1
TIGR02090	TIGR02090: LEU1_arch: isopropylmalate/citramalate/homocitrate synthases	1	1	1	1	1	1	1	1	1	1	1	1	1	1	1	1	1	1	1	1	1	1	1	1	1	1	1	1	1	1	1	1	1	1	1	1	1	1	1	1	1	1	1	1	1	1	1	1
TIGR02097	TIGR02097: yccV: hemimethylated DNA binding domain	1	1	1	1	1	1	0	1	1	1	1	1	1	1	0	1	1	1	1	1	1	0	1	1	0	1	0	1	1	1	1	1	1	0	0	1	1	1	1	1	1	1	1	1	1	1	1	1
TIGR02123	TIGR02123: TRAP_fused: TRAP transporter, 4TM/12TM fusion protein	1	1	1	1	1	1	1	1	1	1	1	1	1	1	1	1	1	1	1	1	1	1	1	1	1	1	1	1	1	1	1	0	1	0	1	1	1	1	1	1	1	1	1	1	1	1	1	1
TIGR02133	TIGR02133: RPI_actino: ribose 5-phosphate isomerase	1	1	1	1	1	0	0	1	0	0	0	1	1	1	1	0	1	1	1	1	1	0	0	0	1	1	1	1	1	1	1	1	1	1	1	0	0	1	1	1	1	1	1	1	1	1	1	1
TIGR02134	TIGR02134: transald_staph: transaldolase	1	1	1	1	1	0	0	0	1	0	1	0	1	1	1	1	1	1	0	1	1	1	1	1	0	1	1	1	1	1	0	0	1	0	1	1	0	1	1	1	1	1	1	1	1	1	1	1
TIGR02142	TIGR02142: modC_ABC: molybdate ABC transporter, ATP-binding protein	1	1	1	1	1	1	1	1	1	1	1	1	1	1	1	1	1	1	1	1	1	1	1	1	1	1	1	1	1	1	1	1	1	1	1	1	1	1	1	1	1	1	1	1	1	1	1	1
TIGR02146	TIGR02146: LysS_fung_arch: homocitrate synthase	1	1	1	1	1	1	1	1	1	1	1	1	1	1	1	1	1	0	1	1	1	1	1	1	1	1	1	1	1	1	1	1	1	1	1	1	1	1	1	1	1	1	1	1	1	1	1	1
TIGR02149	TIGR02149: glgA_Coryne: glycogen synthase, Corynebacterium family	1	1	1	1	1	1	1	1	1	1	1	1	1	1	1	1	1	1	1	1	1	1	1	1	1	1	1	1	1	1	1	1	1	1	1	1	1	1	1	1	1	1	1	1	1	1	1	1
TIGR02154	TIGR02154: PhoB: phosphate regulon transcriptional regulatory protein PhoB	1	1	1	1	1	1	1	1	1	1	1	1	1	1	1	1	1	1	1	1	1	1	1	1	1	1	1	1	1	1	1	1	1	1	1	1	1	1	1	1	1	1	1	1	1	1	1	1
TIGR02180	TIGR02180: GRX_euk: glutaredoxin	1	1	1	1	1	1	1	1	1	1	1	1	1	1	1	1	1	0	1	1	1	1	0	1	1	1	1	1	1	1	1	1	1	0	0	1	1	1	1	1	1	1	1	1	1	1	1	1
TIGR02181	TIGR02181: GRX_bact: glutaredoxin 3	1	1	1	1	1	1	1	1	1	1	1	1	1	1	1	1	1	1	1	1	1	1	0	1	1	1	1	1	1	1	1	1	1	0	0	1	1	1	1	1	1	1	1	1	1	1	1	1
TIGR02188	TIGR02188: Ac_CoA_lig_AcsA: acetate--CoA ligase	1	1	1	1	1	1	1	1	1	1	1	1	1	0	1	1	1	1	1	1	1	1	1	1	1	1	1	1	1	1	1	1	1	0	1	1	1	1	1	1	1	1	1	1	1	1	1	1
TIGR02191	TIGR02191: RNaseIII: ribonuclease III	1	1	1	1	1	0	0	0	0	0	0	1	1	1	1	0	1	1	1	1	1	0	0	0	1	1	0	1	1	1	1	1	0	1	1	1	0	0	1	1	1	1	1	1	1	1	0	1
TIGR02208	TIGR02208: lipid_A_msbB: lipid A biosynthesis (KDO)2-(lauroyl)-lipid IVA acyltransferase	0	0	0	1	1	1	1	0	0	0	0	1	0	1	1	0	1	1	1	1	1	1	1	1	0	1	0	1	1	1	1	1	1	0	0	1	0	0	1	1	1	1	1	1	1	1	1	1
TIGR02210	TIGR02210: rodA_shape: rod shape-determining protein RodA	1	1	1	1	1	1	1	0	0	0	1	1	0	1	0	0	1	1	1	1	1	1	1	1	1	1	0	1	1	1	1	1	1	1	0	1	1	0	1	1	1	1	1	1	1	1	1	1
TIGR02211	TIGR02211: LolD_lipo_ex: lipoprotein releasing system, ATP-binding protein	1	1	1	1	1	1	1	1	1	1	1	1	1	1	1	1	1	1	1	1	1	1	1	1	1	1	1	1	1	1	1	1	1	1	1	1	1	1	1	1	1	1	1	1	1	1	1	1
TIGR02212	TIGR02212: lolCE: lipoprotein releasing system, transmembrane protein, LolC/E family	1	1	1	1	1	1	1	0	0	0	0	1	0	1	0	0	1	1	1	1	1	1	1	0	0	1	0	1	1	1	1	1	1	1	1	0	0	1	1	1	1	1	1	1	1	1	1	1
TIGR02213	TIGR02213: lolE_release: lipoprotein releasing system, transmembrane protein LolE	1	1	1	1	1	1	1	0	0	0	0	1	0	1	0	0	1	1	1	1	1	1	1	0	0	1	0	1	1	1	1	1	1	1	1	0	0	1	1	1	1	1	1	1	1	1	1	1
TIGR02214	TIGR02214: spoVD_pbp: stage V sporulation protein D	1	1	1	1	1	1	0	1	1	1	1	1	1	1	1	1	1	1	1	1	1	1	1	1	1	1	1	1	1	1	1	1	1	0	0	1	1	1	1	1	1	1	1	1	1	1	1	1
TIGR02227	TIGR02227: sigpep_I_bact: signal peptidase I	1	1	1	1	1	0	0	0	0	0	0	1	1	1	1	0	1	1	1	1	1	0	0	0	0	1	0	1	1	1	1	1	1	1	1	1	1	0	1	1	1	1	1	1	1	1	1	1
TIGR02236	TIGR02236: recomb_radA: DNA repair and recombination protein RadA	1	1	1	1	1	0	0	0	1	0	1	1	1	1	0	1	1	1	1	1	1	1	1	1	1	1	1	1	1	1	1	1	1	0	1	1	0	1	1	1	1	1	1	1	1	1	1	1
TIGR02238	TIGR02238: recomb_DMC1: meiotic recombinase Dmc1	1	1	1	1	1	0	0	0	1	0	1	1	1	1	0	1	1	1	1	1	1	1	1	1	1	1	1	1	1	1	1	1	1	0	1	1	0	1	1	1	1	1	1	1	1	1	1	1
TIGR02239	TIGR02239: recomb_RAD51: DNA repair protein RAD51	1	1	1	1	1	0	0	0	1	0	1	1	1	1	0	1	1	1	1	1	1	1	1	1	1	1	1	1	1	1	1	1	1	0	1	1	0	1	1	1	1	1	1	1	1	1	1	1
TIGR02252	TIGR02252: DREG-2: HAD hydrolase, REG-2-like, family IA	1	1	1	1	1	0	0	0	0	0	1	1	0	1	0	1	1	1	1	1	1	1	1	1	1	1	1	1	0	1	0	0	0	1	1	1	1	1	1	1	1	1	1	1	1	1	1	1
TIGR02253	TIGR02253: CTE7: HAD hydrolase, TIGR02253 family	1	1	1	1	1	1	0	0	0	0	1	1	1	1	0	1	1	1	1	1	1	1	1	1	1	1	1	1	1	1	1	1	1	1	1	1	1	1	1	1	1	1	1	1	1	1	1	1
TIGR02254	TIGR02254: YjjG/YfnB: HAD hydrolase, TIGR02254 family	1	1	1	1	1	0	0	0	0	0	1	1	0	1	0	1	1	1	1	1	1	1	1	1	1	1	1	1	1	1	1	1	0	1	1	1	1	1	1	1	1	1	1	1	1	1	1	1
TIGR02262	TIGR02262: benz_CoA_lig: benzoate-CoA ligase family	1	1	1	1	1	1	1	1	1	1	1	1	1	0	1	1	1	1	1	1	1	1	1	1	1	1	1	1	1	1	1	1	1	0	1	1	1	1	1	1	1	1	1	1	1	1	1	1
TIGR02274	TIGR02274: dCTP_deam: deoxycytidine triphosphate deaminase	1	1	1	1	1	0	0	0	0	0	1	1	1	1	1	1	1	1	1	1	1	1	1	1	1	1	1	1	1	0	1	1	1	1	1	1	1	0	1	1	1	1	1	1	1	1	1	1
TIGR02282	TIGR02282: MltB: lytic murein transglycosylase B	1	1	1	1	1	1	1	1	0	0	0	1	0	1	1	1	1	1	1	1	1	1	0	1	0	1	0	1	1	1	1	1	1	0	1	1	1	0	1	1	1	1	1	1	1	1	0	1
TIGR02283	TIGR02283: MltB_2: lytic murein transglycosylase	1	1	1	1	1	1	1	1	0	0	0	1	0	1	1	1	1	1	1	1	1	1	0	1	0	1	0	1	1	1	1	1	1	0	1	1	1	0	1	1	1	1	1	1	1	1	0	1
TIGR02287	TIGR02287: PaaY: phenylacetic acid degradation protein PaaY	0	0	1	1	1	1	1	1	1	1	1	1	1	1	0	1	1	1	1	1	1	1	1	1	1	1	1	1	1	1	1	1	1	0	1	0	1	1	1	1	1	1	1	1	1	1	1	1
TIGR02299	TIGR02299: HpaE: 5-carboxymethyl-2-hydroxymuconate semialdehyde dehydrogenase	1	1	1	1	1	1	1	1	1	1	0	1	1	1	1	1	1	1	1	1	1	1	1	1	1	1	1	1	1	1	1	1	1	1	1	1	1	1	1	1	1	1	1	1	1	1	1	1
TIGR02313	TIGR02313: HpaI-NOT-DapA: 2,4-dihydroxyhept-2-ene-1,7-dioic acid aldolase	1	1	1	1	1	0	1	0	0	1	0	1	0	1	0	0	1	1	1	1	1	1	1	1	1	1	1	1	1	1	1	1	1	1	1	1	1	1	1	1	1	1	1	1	1	1	1	1
TIGR02314	TIGR02314: ABC_MetN: D-methionine ABC transporter, ATP-binding protein	1	1	1	1	1	1	1	1	1	1	1	1	1	1	1	1	1	1	1	1	1	1	1	1	1	1	1	1	1	1	1	1	1	1	1	1	1	1	1	1	1	1	1	1	1	1	1	1
TIGR02315	TIGR02315: ABC_phnC: phosphonate ABC transporter, ATP-binding protein	1	1	1	1	1	1	1	1	1	1	1	1	1	1	1	1	1	1	1	1	1	1	1	1	1	1	1	1	1	1	1	1	1	1	1	1	1	1	1	1	1	1	1	1	1	1	1	1
TIGR02316	TIGR02316: propion_prpE: propionate--CoA ligase	1	1	1	1	1	1	1	1	1	1	1	1	1	0	1	1	1	1	1	1	1	1	1	1	1	1	1	1	1	1	1	1	1	0	1	1	1	1	1	1	1	1	1	1	1	1	1	1
TIGR02317	TIGR02317: prpB: methylisocitrate lyase	1	1	1	1	0	0	0	1	0	0	1	1	1	1	0	1	1	0	1	1	1	1	1	1	1	1	0	1	0	1	1	1	1	1	0	1	1	1	1	1	1	1	1	1	1	1	1	1
TIGR02319	TIGR02319: CPEP_Pphonmut: carboxyvinyl-carboxyphosphonate phosphorylmutase	1	1	1	1	0	0	0	1	0	0	1	1	1	1	0	1	1	0	1	1	1	1	1	1	1	1	0	1	0	1	1	1	1	1	0	1	1	1	1	1	1	1	1	1	1	1	1	1
TIGR02320	TIGR02320: PEP_mutase: phosphoenolpyruvate phosphomutase	1	1	1	1	0	0	0	1	0	0	1	1	1	1	0	1	1	0	1	1	1	1	1	1	1	1	0	1	0	1	1	1	1	1	0	1	1	1	1	1	1	1	1	1	1	1	1	1
TIGR02321	TIGR02321: Pphn_pyruv_hyd: phosphonopyruvate hydrolase	1	1	1	1	0	0	0	1	0	0	1	1	1	1	0	1	1	0	1	1	1	1	1	1	1	1	0	1	0	1	1	1	1	1	0	1	1	1	1	1	1	1	1	1	1	1	1	1
TIGR02323	TIGR02323: CP_lyasePhnK: phosphonate C-P lyase system protein PhnK	1	1	1	1	1	1	1	1	1	1	1	1	1	1	1	1	1	1	1	1	1	1	1	1	1	1	1	1	1	1	1	1	1	1	1	1	1	1	1	1	1	1	1	1	1	1	1	1
TIGR02324	TIGR02324: CP_lyasePhnL: phosphonate C-P lyase system protein PhnL	1	1	1	1	1	1	1	1	1	1	1	1	1	1	1	1	1	1	1	1	1	1	1	1	1	1	1	1	1	1	1	1	1	1	1	1	1	1	1	1	1	1	1	1	1	1	1	1
TIGR02329	TIGR02329: propionate_PrpR: propionate catabolism operon regulatory protein PrpR	0	0	1	1	1	1	1	1	1	1	1	1	1	1	1	0	1	1	1	1	1	1	1	1	1	1	0	1	1	1	1	1	1	0	1	1	0	1	1	1	1	1	1	1	1	1	0	1
TIGR02337	TIGR02337: HpaR: homoprotocatechuate degradation operon regulator, HpaR	1	1	1	1	1	1	1	1	1	1	1	1	1	1	1	1	1	1	1	1	0	1	1	0	1	1	0	1	1	1	1	1	1	1	1	1	1	0	1	1	1	1	1	1	1	1	1	1
TIGR02348	TIGR02348: GroEL: chaperonin GroL	1	1	0	1	1	0	1	1	0	0	1	1	1	0	0	1	1	1	1	1	1	1	1	1	1	1	1	1	1	1	1	1	1	0	0	1	0	0	1	1	1	1	1	1	1	1	1	1
TIGR02355	TIGR02355: moeB: molybdopterin synthase sulfurylase MoeB	0	0	0	1	1	1	1	0	0	0	0	1	0	1	0	0	1	0	1	1	1	1	0	1	1	1	0	1	1	1	1	1	1	1	1	1	1	1	1	1	1	1	1	1	1	1	1	1
TIGR02356	TIGR02356: adenyl_thiF: thiazole biosynthesis adenylyltransferase ThiF	0	0	0	1	1	1	1	0	0	0	0	1	0	1	0	0	1	0	1	1	1	1	0	1	1	1	0	1	1	1	1	1	1	1	1	1	1	1	1	1	1	1	1	1	1	1	1	1
TIGR02380	TIGR02380: ECA_wecA: undecaprenyl-phosphate alpha-N-acetylglucosaminyl 1-phosphatetransferase	1	1	1	1	1	0	0	1	1	0	0	1	1	0	1	1	0	0	1	1	1	1	1	1	1	1	0	1	1	1	1	1	1	0	0	0	0	1	1	1	1	1	1	1	1	1	1	1
TIGR02381	TIGR02381: cspD: cold shock domain protein CspD	1	1	1	0	1	0	0	0	0	1	1	0	1	1	1	1	1	1	1	1	1	1	1	1	1	1	1	1	1	0	1	1	1	0	1	1	1	0	1	1	1	1	1	1	1	1	1	1
TIGR02392	TIGR02392: rpoH_proteo: alternative sigma factor RpoH	1	1	1	1	1	1	0	1	1	1	1	1	1	1	0	1	1	0	1	1	1	1	1	1	1	1	1	1	1	1	1	1	1	1	1	1	1	0	1	1	1	1	1	1	1	1	1	1
TIGR02393	TIGR02393: RpoD_Cterm: RNA polymerase sigma factor RpoD	1	1	1	1	1	1	0	1	1	1	1	1	1	1	0	1	1	0	1	1	1	1	1	1	1	1	1	1	1	1	1	1	1	1	1	1	1	0	1	1	1	1	1	1	1	1	1	1
TIGR02394	TIGR02394: rpoS_proteo: RNA polymerase sigma factor RpoS	1	1	1	1	1	1	0	1	1	1	1	1	1	1	0	1	1	0	1	1	1	1	1	1	1	1	1	1	1	1	1	1	1	1	1	1	1	0	1	1	1	1	1	1	1	1	1	1
TIGR02397	TIGR02397: dnaX_nterm: DNA polymerase III, subunit gamma and tau	1	1	1	1	0	1	1	1	1	1	1	1	1	1	1	1	1	1	1	1	0	1	1	1	1	1	1	1	0	1	1	1	1	1	1	1	1	1	1	1	1	1	1	1	1	1	1	1
TIGR02407	TIGR02407: ectoine_ectB: diaminobutyrate--2-oxoglutarate aminotransferase	1	1	1	1	1	1	1	1	1	0	1	1	1	1	1	1	1	1	1	1	1	1	1	1	1	1	1	1	1	1	1	1	1	1	1	1	1	1	1	1	1	1	1	1	1	1	1	1
TIGR02415	TIGR02415: 23BDH: acetoin reductases	1	1	1	1	1	1	1	1	1	1	1	1	1	1	1	1	1	1	1	1	1	1	1	1	1	1	1	1	1	1	1	1	1	1	1	1	1	1	1	1	1	1	1	1	1	1	1	1
TIGR02420	TIGR02420: dksA: RNA polymerase-binding protein DksA	1	1	1	1	1	1	1	1	0	1	1	1	1	1	1	0	1	1	1	1	1	1	1	1	1	1	1	1	1	1	1	1	1	0	1	1	1	1	1	1	1	1	1	1	1	1	1	1
TIGR02426	TIGR02426: protocat_pcaB: 3-carboxy-cis,cis-muconate cycloisomerase	1	1	1	1	1	1	1	1	1	1	1	1	1	1	1	1	1	1	0	1	1	1	1	0	1	1	1	1	1	1	1	1	1	0	0	1	1	1	1	1	1	1	1	1	1	1	1	1
TIGR02466	TIGR02466: TIGR02466: conserved hypothetical protein	0	0	1	0	1	0	0	0	0	0	0	0	0	1	0	1	1	0	1	1	1	1	0	1	1	1	0	1	1	1	1	1	1	1	0	1	1	1	1	1	1	1	1	1	1	1	1	1
TIGR02479	TIGR02479: FliA_WhiG: RNA polymerase sigma factor, FliA/WhiG family	1	1	1	1	1	1	0	1	1	1	1	1	1	1	0	1	1	0	1	1	1	1	1	1	1	1	1	1	1	1	1	1	1	1	1	1	1	0	1	1	1	1	1	1	1	1	1	1
TIGR02504	TIGR02504: NrdJ_Z: ribonucleoside-diphosphate reductase, adenosylcobalamin-dependent	1	1	1	1	1	0	1	1	0	0	0	1	0	1	0	1	1	0	1	1	1	1	1	1	1	1	1	1	1	1	1	1	1	1	0	1	1	1	1	1	1	1	1	1	1	1	1	1
TIGR02510	TIGR02510: NrdE-prime: ribonucleoside-diphosphate reductase, alpha chain	1	1	1	1	1	0	0	1	0	0	0	1	1	1	0	1	1	0	1	1	1	1	1	1	1	1	1	1	1	1	1	1	1	1	0	1	1	1	1	1	1	1	1	1	1	1	1	1
TIGR02540	TIGR02540: gpx7: putative glutathione peroxidase Gpx7	1	1	0	0	1	0	0	0	0	0	0	1	0	1	0	0	1	0	1	1	1	1	1	0	1	1	1	1	1	0	1	1	1	1	1	1	0	1	1	1	1	1	1	1	1	1	0	1
TIGR02546	TIGR02546: III_secr_ATP: type III secretion apparatus H+-transporting two-sector ATPase	1	1	1	1	0	1	1	1	1	1	0	1	1	1	0	1	1	1	1	1	1	1	1	1	1	1	1	1	1	1	1	1	1	1	1	1	1	1	1	1	1	1	1	1	1	1	1	1
TIGR02614	TIGR02614: ftsW: cell division protein FtsW	1	1	1	1	1	1	1	0	0	0	1	1	0	1	0	0	1	1	1	1	1	1	1	1	1	1	0	1	1	1	1	1	1	1	0	1	1	0	1	1	1	1	1	1	1	1	1	1
TIGR02615	TIGR02615: spoVE: stage V sporulation protein E	1	1	1	1	1	1	1	0	0	0	1	1	0	1	0	0	1	1	1	1	1	1	1	1	1	1	0	1	1	1	1	1	1	1	0	1	1	0	1	1	1	1	1	1	1	1	1	1
TIGR02640	TIGR02640: gas_vesic_GvpN: gas vesicle protein GvpN	1	1	1	1	1	1	1	1	1	1	0	1	1	1	1	1	0	1	1	1	1	1	1	1	1	1	0	1	1	1	1	1	1	1	1	1	1	1	1	1	1	1	1	1	1	1	1	1
TIGR02660	TIGR02660: nifV_homocitr: homocitrate synthase	1	1	1	1	1	1	1	1	1	1	1	1	1	1	1	1	1	0	1	1	1	1	1	1	1	1	1	1	1	1	1	1	1	1	1	1	1	1	1	1	1	1	1	1	1	1	1	1
TIGR02673	TIGR02673: FtsE: cell division ATP-binding protein FtsE	1	1	1	1	1	1	1	1	1	1	1	1	1	1	1	1	1	1	1	1	1	1	1	1	1	1	1	1	1	1	1	1	1	1	1	1	1	1	1	1	1	1	1	1	1	1	1	1
TIGR02685	TIGR02685: pter_reduc_Leis: pteridine reductase	1	1	1	1	1	1	1	1	1	1	1	1	1	1	1	1	1	1	1	1	1	1	1	1	1	1	1	1	1	1	1	1	1	1	1	1	1	0	1	1	1	1	1	1	1	1	1	1
TIGR02696	TIGR02696: pppGpp_PNP: guanosine pentaphosphate synthetase I/polyribonucleotide nucleotidyltransferase	1	1	1	1	1	1	0	1	0	0	1	1	1	1	1	0	1	0	1	1	1	1	1	1	1	1	1	1	1	1	1	1	1	0	1	1	1	0	1	1	1	1	1	1	1	1	1	1
TIGR02713	TIGR02713: allophanate_hyd: allophanate hydrolase	1	1	1	1	1	1	1	1	1	0	1	1	1	1	1	1	1	1	1	1	1	1	1	1	1	1	1	1	1	1	1	1	1	1	1	1	1	1	1	1	1	1	1	1	1	1	1	1
TIGR02715	TIGR02715: amido_AtzE: amidohydrolase, AtzE family	1	1	1	1	1	1	1	1	1	0	1	1	1	1	1	1	1	1	1	1	1	1	1	1	1	1	1	1	1	1	1	1	1	1	1	1	1	1	1	1	1	1	1	1	1	1	1	1
TIGR02727	TIGR02727: MTHFS_bact: 5-formyltetrahydrofolate cyclo-ligase	1	1	1	1	1	1	1	1	1	1	1	1	0	1	1	1	1	1	1	1	1	1	1	1	1	1	1	1	1	1	1	1	1	1	1	1	1	1	1	1	1	1	1	1	1	1	1	1
TIGR02729	TIGR02729: Obg_CgtA: Obg family GTPase CgtA	1	1	1	1	1	1	1	1	1	1	1	1	0	1	1	1	1	1	1	1	0	1	1	1	0	1	0	1	1	1	1	1	1	1	1	1	0	1	1	1	1	1	1	1	1	1	1	1
TIGR02748	TIGR02748: GerC3_HepT: heptaprenyl diphosphate synthase component II	1	1	1	1	1	1	1	1	1	1	0	1	1	1	1	1	1	1	1	1	1	1	1	1	1	1	1	1	1	1	1	1	1	1	1	1	1	1	1	1	1	1	1	1	1	1	1	1
TIGR02749	TIGR02749: prenyl_cyano: solanesyl diphosphate synthase	1	1	1	1	1	1	1	1	1	1	0	1	1	1	1	1	1	1	1	1	1	1	1	1	1	1	1	1	1	1	1	1	1	1	1	1	1	1	1	1	1	1	1	1	1	1	1	1
TIGR02752	TIGR02752: MenG_heptapren: demethylmenaquinone methyltransferase	1	1	1	1	1	1	1	1	1	1	1	1	1	1	1	1	1	0	1	1	1	1	1	1	1	1	1	1	1	1	1	1	1	0	1	1	1	1	1	1	1	1	1	1	1	1	1	1
TIGR02769	TIGR02769: nickel_nikE: nickel import ATP-binding protein NikE	1	1	1	1	1	1	1	1	1	1	1	1	1	1	1	1	1	1	1	1	1	1	1	1	1	1	1	1	1	1	1	1	1	1	1	1	1	1	1	1	1	1	1	1	1	1	1	1
TIGR02770	TIGR02770: nickel_nikD: nickel import ATP-binding protein NikD	1	1	1	1	1	1	1	1	1	1	1	1	1	1	1	1	1	1	1	1	1	1	1	1	1	1	1	1	1	1	1	1	1	1	1	1	1	1	1	1	1	1	1	1	1	1	1	1
TIGR02796	TIGR02796: tolQ: protein TolQ	1	1	1	1	1	1	1	1	1	1	1	1	0	1	1	1	1	1	1	1	1	1	1	1	1	1	1	1	1	1	1	1	1	1	0	0	1	1	1	1	1	1	1	1	1	1	1	1
TIGR02797	TIGR02797: exbB: tonB-system energizer ExbB	1	1	1	1	1	1	1	1	1	1	1	1	0	1	1	1	1	1	1	1	1	1	1	1	1	1	1	1	1	1	1	1	1	1	0	0	1	1	1	1	1	1	1	1	1	1	1	1
TIGR02799	TIGR02799: thio_ybgC: tol-pal system-associated acyl-CoA thioesterase	1	1	1	0	1	1	1	1	1	0	1	0	0	1	1	1	1	1	0	1	1	1	0	1	0	1	1	1	1	1	1	1	1	1	1	1	0	1	1	1	1	1	1	1	1	1	1	1
TIGR02800	TIGR02800: propeller_TolB: Tol-Pal system beta propeller repeat protein TolB	1	1	1	1	1	1	0	1	1	1	1	1	0	1	1	1	1	1	1	1	1	1	1	1	1	1	1	1	1	1	1	1	1	1	1	1	1	0	1	1	1	1	1	1	1	1	1	1
TIGR02801	TIGR02801: tolR: protein TolR	1	1	1	1	1	1	1	1	1	1	1	1	0	1	1	1	1	1	1	1	1	1	1	1	1	1	1	1	1	1	1	1	1	1	1	1	1	1	1	1	1	1	1	1	1	1	1	1
TIGR02802	TIGR02802: Pal_lipo: peptidoglycan-associated lipoprotein	1	1	1	1	1	1	0	1	1	1	0	1	0	1	1	1	1	1	1	1	1	1	1	1	1	1	1	1	1	1	1	1	1	0	1	1	1	1	1	1	1	1	1	1	1	1	1	1
TIGR02803	TIGR02803: ExbD_1: TonB system transport protein ExbD	1	1	1	1	1	1	1	1	1	1	1	1	0	1	1	1	1	1	1	1	1	1	1	1	1	1	1	1	1	1	1	1	1	1	1	1	1	1	1	1	1	1	1	1	1	1	1	1
TIGR02804	TIGR02804: ExbD_2: TonB system transport protein ExbD	1	1	1	1	1	1	1	1	1	1	1	1	0	1	1	1	1	1	1	1	1	1	1	1	1	1	1	1	1	1	1	1	1	1	1	1	1	1	1	1	1	1	1	1	1	1	1	1
TIGR02817	TIGR02817: adh_fam_1: zinc-binding alcohol dehydrogenase family protein	1	1	1	1	1	0	0	0	0	0	0	1	0	1	0	0	1	0	1	1	1	1	1	1	1	1	1	1	1	1	1	1	1	0	0	1	1	1	1	1	1	1	1	1	1	1	1	1
TIGR02823	TIGR02823: oxido_YhdH: putative quinone oxidoreductase, YhdH/YhfP family	1	1	1	1	1	0	0	0	0	0	0	1	0	1	0	0	1	1	1	1	1	1	1	1	1	1	1	1	1	1	1	1	1	0	0	1	1	1	1	1	1	1	1	1	1	1	1	1
TIGR02824	TIGR02824: quinone_pig3: putative NAD(P)H quinone oxidoreductase, PIG3 family	1	1	1	1	1	0	0	0	0	0	0	1	0	1	0	0	1	1	1	1	1	1	1	1	1	1	1	1	1	1	1	1	1	0	0	1	1	1	1	1	1	1	1	1	1	1	1	1
TIGR02825	TIGR02825: B4_12hDH: leukotriene B4 12-hydroxydehydrogenase/15-oxo-prostaglandin 13-reductase	1	1	1	1	1	0	0	0	0	0	0	1	0	1	0	0	1	0	1	1	1	1	1	1	0	1	1	1	1	1	1	1	1	0	0	0	1	1	1	1	1	1	1	1	1	1	1	1
TIGR02842	TIGR02842: CyoC: cytochrome o ubiquinol oxidase, subunit III	1	1	1	1	1	1	0	0	1	1	0	0	1	1	1	0	1	1	1	1	1	1	1	1	0	1	1	1	1	1	1	1	1	1	1	0	1	0	1	1	1	1	1	1	1	1	1	1
TIGR02843	TIGR02843: CyoB: cytochrome o ubiquinol oxidase, subunit I	1	1	1	1	1	0	0	0	1	1	0	0	1	1	0	1	1	1	1	1	1	1	1	1	0	1	1	0	1	1	1	1	1	1	0	0	1	0	1	1	1	1	1	1	1	1	1	1
TIGR02850	TIGR02850: spore_sigG: RNA polymerase sigma-G factor	1	1	1	1	1	1	0	1	1	1	1	1	1	1	0	1	1	0	1	1	1	1	1	1	1	1	1	1	1	1	1	1	1	1	1	1	1	0	1	1	1	1	1	1	1	1	1	1
TIGR02866	TIGR02866: CoxB: cytochrome c oxidase, subunit II	1	1	1	1	1	0	0	0	0	1	0	0	1	1	0	1	1	1	1	1	1	1	1	1	1	1	0	1	1	1	1	1	1	1	0	0	1	1	1	1	1	1	1	1	1	1	1	1
TIGR02875	TIGR02875: spore_0_A: sporulation transcription factor Spo0A	1	1	1	0	1	1	1	1	1	1	1	1	1	1	1	1	1	1	1	1	1	1	1	1	1	1	0	1	1	1	1	1	1	1	1	1	1	0	1	1	1	1	1	1	1	1	1	1
TIGR02882	TIGR02882: QoxB: cytochrome aa3 quinol oxidase, subunit I	1	1	1	1	1	0	0	0	1	1	0	0	1	1	0	1	1	1	1	1	1	1	1	1	0	1	1	0	1	1	1	1	1	1	0	0	1	0	1	1	1	1	1	1	1	1	1	1
TIGR02885	TIGR02885: spore_sigF: RNA polymerase sigma-F factor	1	1	1	1	1	1	0	1	1	1	1	1	1	1	0	1	1	0	1	1	1	1	1	1	1	1	1	1	1	1	1	1	1	1	1	1	1	0	1	1	1	1	1	1	1	1	1	1
TIGR02891	TIGR02891: CtaD_CoxA: cytochrome c oxidase, subunit I	1	1	1	1	1	0	0	0	1	1	0	0	1	1	0	1	1	1	1	1	1	1	1	1	0	1	1	0	1	1	1	1	1	1	0	0	1	0	1	1	1	1	1	1	1	1	1	1
TIGR02897	TIGR02897: QoxC: cytochrome aa3 quinol oxidase, subunit III	1	1	1	1	1	1	0	0	1	1	0	0	1	1	1	0	1	1	1	1	1	1	1	1	0	1	1	1	1	1	1	1	1	1	1	0	1	0	1	1	1	1	1	1	1	1	1	1
TIGR02915	TIGR02915: PEP_resp_reg: PEP-CTERM-box response regulator transcription factor	0	0	1	1	1	1	1	1	1	1	1	1	1	1	1	0	1	1	1	1	1	1	1	1	1	1	0	1	1	1	1	1	1	0	1	1	0	1	1	1	1	1	1	1	1	1	0	1
TIGR02920	TIGR02920: acc_sec_Y2: accessory Sec system translocase SecY2	1	1	1	1	1	1	1	1	1	1	1	1	1	1	1	1	1	1	1	1	1	1	1	1	1	1	0	1	1	1	1	0	1	0	1	1	0	1	1	1	1	1	1	1	1	1	1	1
TIGR02924	TIGR02924: ICDH_alpha: isocitrate dehydrogenase	0	0	1	1	1	1	1	0	1	1	1	1	0	0	1	1	1	1	1	1	1	1	1	1	1	1	1	1	1	1	1	1	1	0	1	1	1	1	1	1	1	1	1	1	1	1	1	1
TIGR02927	TIGR02927: SucB_Actino: 2-oxoglutarate dehydrogenase, E2 component, dihydrolipoamide succinyltransferase	1	1	1	0	1	0	0	0	1	1	1	1	1	0	1	1	0	0	1	1	1	1	1	1	0	1	1	1	1	1	1	1	1	0	1	1	1	1	1	1	1	1	1	1	1	1	1	1
TIGR02937	TIGR02937: sigma70-ECF: RNA polymerase sigma factor, sigma-70 family	1	1	1	1	1	1	0	1	1	1	1	1	1	1	0	1	1	0	1	1	1	1	1	1	1	1	1	1	1	1	1	1	1	1	1	1	1	0	1	1	1	1	1	1	1	1	1	1
TIGR02941	TIGR02941: Sigma_B: RNA polymerase sigma-B factor	1	1	1	1	1	1	0	1	1	1	1	1	1	1	0	1	1	0	1	1	1	1	1	1	1	1	1	1	1	1	1	1	1	1	1	1	1	0	1	1	1	1	1	1	1	1	1	1
TIGR02968	TIGR02968: succ_dehyd_anc: succinate dehydrogenase, hydrophobic membrane anchor protein	1	1	1	1	1	1	1	1	1	1	0	0	1	1	1	1	1	1	1	1	1	1	1	1	1	1	0	1	1	1	1	1	1	0	1	1	1	0	1	1	1	1	1	1	1	1	1	1
TIGR02970	TIGR02970: succ_dehyd_cytB: succinate dehydrogenase, cytochrome b556 subunit	1	1	1	1	1	1	1	1	1	1	0	0	1	1	1	1	1	1	1	1	1	1	1	1	1	1	0	1	1	1	1	1	0	0	1	1	1	0	1	1	1	1	1	1	1	1	1	1
TIGR02974	TIGR02974: phageshock_pspF: psp operon transcriptional activator	0	0	1	1	1	1	1	1	1	1	1	1	1	1	1	0	1	1	1	1	1	1	1	1	1	1	0	1	1	1	1	1	1	0	1	1	0	1	1	1	1	1	1	1	1	1	0	1
TIGR02980	TIGR02980: SigBFG: RNA polymerase sigma-70 factor, sigma-B/F/G subfamily	1	1	1	1	1	1	0	1	1	1	1	1	1	1	0	1	1	0	1	1	1	1	1	1	1	1	1	1	1	1	1	1	1	1	1	1	1	0	1	1	1	1	1	1	1	1	1	1
TIGR02982	TIGR02982: heterocyst_DevA: ABC exporter ATP-binding subunit, DevA family	1	1	1	1	1	1	1	1	1	1	1	1	1	1	1	1	1	1	1	1	1	1	1	1	1	1	1	1	1	1	1	1	1	1	1	1	1	1	1	1	1	1	1	1	1	1	1	1
TIGR02997	TIGR02997: Sig70-cyanoRpoD: RNA polymerase sigma factor, cyanobacterial RpoD-like family	1	1	1	1	1	1	0	1	1	1	1	1	1	1	0	1	1	0	1	1	1	1	1	1	1	1	1	1	1	1	1	1	1	1	1	1	1	0	1	1	1	1	1	1	1	1	1	1
TIGR03005	TIGR03005: ectoine_ehuA: ectoine/hydroxyectoine ABC transporter, ATP-binding protein EhuA	1	1	1	1	1	1	1	1	1	1	1	1	1	1	1	1	1	1	1	1	1	1	1	1	1	1	1	1	1	1	1	1	1	1	1	1	1	1	1	1	1	1	1	1	1	1	1	1
TIGR03026	TIGR03026: NDP-sugDHase: nucleotide sugar dehydrogenase	1	1	0	1	0	0	0	0	0	0	0	1	0	1	0	0	1	0	1	1	1	1	1	1	1	1	0	1	1	1	1	0	1	1	1	1	1	1	1	1	1	1	1	1	1	1	1	1
TIGR03072	TIGR03072: release_prfH: putative peptide chain release factor H	1	1	1	1	1	1	1	1	1	0	1	1	1	1	1	0	1	1	1	1	1	1	1	1	1	1	1	1	1	1	1	1	1	1	1	1	1	1	1	1	1	1	1	1	1	1	1	1
TIGR03088	TIGR03088: stp2: sugar transferase, PEP-CTERM/EpsH1 system associated	1	1	1	1	1	1	1	1	1	1	1	1	1	1	1	1	1	1	1	1	1	1	1	1	1	1	1	1	1	1	1	1	1	1	1	1	1	1	1	1	1	1	1	1	1	1	1	1
TIGR03099	TIGR03099: dCO2ase_PEP1: pyridoxal-dependent decarboxylase, exosortase A system-associated	1	1	1	1	0	1	1	1	1	1	1	1	1	1	1	1	1	1	1	1	1	1	1	1	1	1	0	1	1	1	1	1	1	1	1	1	1	1	1	1	1	1	1	1	1	1	1	1
TIGR03105	TIGR03105: gln_synth_III: glutamine synthetase, type III	1	1	1	1	1	1	1	1	1	1	0	1	1	1	1	1	1	0	1	1	1	1	1	1	1	1	1	1	1	1	1	1	1	1	1	1	1	0	1	1	1	1	1	1	1	1	1	1
TIGR03131	TIGR03131: malonate_mdcH: malonate decarboxylase, epsilon subunit	1	1	1	1	1	0	0	0	0	0	0	1	1	1	0	0	1	1	1	1	0	1	1	0	1	1	1	1	1	1	1	1	1	0	1	1	1	0	1	1	1	1	1	1	1	1	1	1
TIGR03137	TIGR03137: AhpC: peroxiredoxin	1	1	1	1	1	0	1	0	0	0	1	1	0	1	0	0	1	1	0	1	0	1	1	0	1	1	1	1	1	1	1	1	1	1	0	0	0	0	1	1	1	1	1	1	1	1	1	1
TIGR03140	TIGR03140: AhpF: alkyl hydroperoxide reductase, F subunit	1	1	0	1	1	1	1	1	1	1	1	1	1	1	1	1	1	1	1	1	1	1	1	1	1	1	1	1	1	1	1	1	1	0	1	1	1	1	1	1	1	1	1	1	1	1	1	1
TIGR03143	TIGR03143: AhpF_homolog: putative alkyl hydroperoxide reductase F subunit	1	1	0	1	1	1	1	1	1	1	1	1	1	1	1	1	1	1	1	1	1	1	1	1	1	1	1	1	1	1	1	1	1	0	1	1	1	1	1	1	1	1	1	1	1	1	1	1
TIGR03145	TIGR03145: cyt_nit_nrfE: cytochrome c nitrate reductase biogenesis protein NrfE	1	1	1	1	1	1	1	1	1	1	1	1	1	1	1	0	1	1	1	1	1	0	1	0	1	1	0	1	1	1	1	1	1	0	0	1	0	1	1	1	1	1	1	1	1	1	1	1
TIGR03147	TIGR03147: cyt_nit_nrfF: cytochrome c nitrite reductase, accessory protein NrfF	1	1	1	1	1	1	1	1	1	1	1	1	1	1	1	1	1	1	1	1	1	0	1	0	1	1	0	1	1	1	1	1	1	0	0	1	0	0	1	1	1	1	1	1	1	1	1	1
TIGR03150	TIGR03150: fabF: beta-ketoacyl-acyl-carrier-protein synthase II	1	1	1	1	1	1	1	0	0	0	0	1	0	1	0	0	1	0	1	1	1	1	1	1	1	1	1	1	1	1	1	1	1	0	1	1	1	1	1	1	1	1	1	1	1	1	1	1
TIGR03178	TIGR03178: allantoinase: allantoinase	1	1	1	1	1	1	1	1	0	1	1	1	1	1	1	1	1	1	1	1	1	1	1	1	1	1	1	1	1	1	1	1	1	1	1	1	1	1	1	1	1	1	1	1	1	1	1	1
TIGR03186	TIGR03186: AKGDH_not_PDH: alpha-ketoglutarate dehydrogenase	1	1	1	0	1	1	0	0	1	1	1	0	1	0	1	1	1	1	1	1	1	1	1	1	1	1	1	1	1	1	1	1	1	0	1	1	1	0	1	1	1	1	1	1	1	1	1	1
TIGR03205	TIGR03205: pimA: dicarboxylate--CoA ligase PimA	1	1	1	1	1	1	1	1	1	1	1	1	1	0	1	1	1	1	1	1	1	1	1	1	1	1	1	1	1	1	1	1	1	0	1	1	1	1	1	1	1	1	1	1	1	1	1	1
TIGR03206	TIGR03206: benzo_BadH: 2-hydroxycyclohexanecarboxyl-CoA dehydrogenase	1	1	1	1	1	1	1	1	1	1	1	1	1	1	1	1	1	1	1	1	1	1	1	1	1	1	1	1	1	1	1	1	1	1	1	1	1	1	1	1	1	1	1	1	1	1	1	1
TIGR03208	TIGR03208: cyc_hxne_CoA_lg: cyclohexanecarboxylate-CoA ligase	1	1	1	1	1	1	1	1	1	1	1	1	1	0	1	1	1	1	1	1	1	1	1	1	1	1	1	1	1	1	1	1	1	0	1	1	1	1	1	1	1	1	1	1	1	1	1	1
TIGR03216	TIGR03216: OH_muco_semi_DH: 2-hydroxymuconic semialdehyde dehydrogenase	1	1	1	1	1	1	1	1	1	1	0	1	1	1	1	1	1	1	1	1	1	1	1	1	1	1	1	1	1	1	1	1	1	1	1	1	1	1	1	1	1	1	1	1	1	1	1	1
TIGR03235	TIGR03235: DNA_S_dndA: cysteine desulfurase DndA	1	1	1	1	1	0	0	1	0	0	0	0	1	0	0	1	1	1	1	1	1	1	0	1	1	1	1	1	0	1	1	1	1	1	1	0	0	1	1	1	1	1	1	1	1	1	1	1
TIGR03240	TIGR03240: arg_catab_astD: succinylglutamic semialdehyde dehydrogenase	1	1	1	1	1	1	1	1	1	1	0	1	1	1	1	1	1	1	1	1	1	1	1	1	1	1	1	1	1	1	1	1	1	1	1	1	1	1	1	1	1	1	1	1	1	1	1	1
TIGR03246	TIGR03246: arg_catab_astC: succinylornithine transaminase family	1	1	1	1	1	1	1	1	1	0	1	1	1	1	1	1	1	1	1	1	1	1	1	1	1	1	1	1	1	1	1	1	1	1	1	1	1	1	1	1	1	1	1	1	1	1	1	1
TIGR03249	TIGR03249: KdgD: 5-dehydro-4-deoxyglucarate dehydratase	1	1	1	1	1	0	1	0	0	1	0	1	0	1	0	0	1	1	1	1	1	1	1	1	1	1	1	1	1	1	1	1	1	1	1	1	1	1	1	1	1	1	1	1	1	1	1	1
TIGR03250	TIGR03250: PhnAcAld_DH: putative phosphonoacetaldehyde dehydrogenase	1	1	1	1	1	1	1	1	1	1	0	1	1	1	1	1	1	1	1	1	1	1	1	1	1	1	1	1	1	1	1	1	1	1	1	1	1	1	1	1	1	1	1	1	1	1	1	1
TIGR03251	TIGR03251: LAT_fam: L-lysine 6-transaminase	1	1	1	1	1	1	1	1	1	0	1	1	1	1	1	1	1	1	1	1	1	1	1	1	0	1	1	1	1	1	1	1	1	0	1	0	1	1	1	1	1	1	1	1	1	1	1	1
TIGR03258	TIGR03258: PhnT: 2-aminoethylphosphonate ABC transport system, ATP-binding component PhnT	1	1	1	1	1	1	1	1	1	1	1	1	1	1	1	1	1	1	1	1	1	1	1	1	1	1	1	1	1	1	1	1	1	1	1	1	1	1	1	1	1	1	1	1	1	1	1	1
TIGR03263	TIGR03263: guanyl_kin: guanylate kinase	1	1	1	1	1	0	0	0	0	0	0	1	0	1	0	0	1	1	1	1	0	1	1	0	1	1	0	1	1	1	1	1	1	0	1	1	1	0	1	1	1	1	1	1	1	1	1	1
TIGR03265	TIGR03265: PhnT2: putative 2-aminoethylphosphonate ABC transporter, ATP-binding protein	1	1	1	1	1	1	1	1	1	1	1	1	1	1	1	1	1	1	1	1	1	1	1	1	1	1	1	1	1	1	1	1	1	1	1	1	1	1	1	1	1	1	1	1	1	1	1	1
TIGR03302	TIGR03302: OM_YfiO: outer membrane assembly lipoprotein YfiO	1	1	1	1	1	1	0	1	0	0	1	1	1	1	1	1	1	1	1	1	1	1	1	1	0	1	0	1	0	1	1	1	1	1	1	1	0	1	1	1	1	1	1	1	1	1	0	1
TIGR03305	TIGR03305: alt_F1F0_F1_bet: alternate F1F0 ATPase, F1 subunit beta	1	1	1	1	0	1	1	1	1	1	0	1	1	1	0	1	1	1	1	1	0	0	1	1	1	1	1	1	1	1	1	1	1	1	1	1	1	1	1	1	1	1	1	1	1	1	1	1
TIGR03306	TIGR03306: altF1_A: alternate F1F0 ATPase, F0 subunit A	1	1	1	1	1	1	1	1	1	1	1	1	0	1	1	1	1	1	1	1	1	1	1	1	1	1	1	1	0	1	1	1	1	1	1	1	0	1	1	1	1	1	1	1	1	1	1	1
TIGR03316	TIGR03316: ygeW: putative carbamoyltransferase YgeW	1	1	1	1	1	1	1	1	1	1	1	0	1	1	1	1	1	1	1	1	1	1	1	1	1	1	1	1	1	1	1	1	1	1	0	1	1	1	1	1	1	1	1	1	1	1	1	1
TIGR03323	TIGR03323: alt_F1F0_F1_gam: alternate F1F0 ATPase, F1 subunit gamma	1	1	0	1	0	1	1	1	0	0	0	1	1	1	0	1	1	1	1	1	0	0	1	1	1	1	0	1	1	1	1	1	1	1	1	0	1	1	1	1	1	1	1	1	1	1	1	1
TIGR03324	TIGR03324: alt_F1F0_F1_al: alternate F1F0 ATPase, F1 subunit alpha	1	1	1	1	0	1	1	1	1	1	0	1	1	1	0	1	1	1	1	1	0	0	1	1	1	1	1	1	1	1	1	1	1	1	1	1	1	1	1	1	1	1	1	1	1	1	1	1
TIGR03325	TIGR03325: BphB_TodD: cis-2,3-dihydrobiphenyl-2,3-diol dehydrogenase	1	1	1	1	1	1	1	1	1	1	1	1	1	1	1	1	1	1	1	1	1	1	1	1	1	1	1	1	1	1	1	1	1	1	1	1	1	1	1	1	1	1	1	1	1	1	1	1
TIGR03350	TIGR03350: type_VI_ompA: type VI secretion system OmpA/MotB family protein	1	1	1	1	1	1	0	1	1	1	0	1	0	1	1	1	1	1	1	1	1	1	1	1	1	1	1	1	1	1	1	1	1	0	1	1	1	0	1	1	1	1	1	1	1	1	1	1
TIGR03372	TIGR03372: putres_am_tran: putrescine aminotransferase	1	1	1	1	1	1	1	1	1	0	1	1	1	1	1	1	1	1	1	1	1	1	1	1	1	1	1	1	1	1	1	1	1	1	1	1	1	1	1	1	1	1	1	1	1	1	1	1
TIGR03374	TIGR03374: ABALDH: 1-pyrroline dehydrogenase	1	1	1	1	1	1	1	1	1	1	0	1	1	1	1	1	1	1	1	1	1	1	1	1	1	1	1	1	1	1	1	1	1	1	1	1	1	1	1	1	1	1	1	1	1	1	1	1
TIGR03376	TIGR03376: glycerol3P_DH: glycerol-3-phosphate dehydrogenase (NAD(+))	0	0	1	1	1	1	1	1	1	1	1	1	1	1	1	1	1	0	1	1	1	1	0	1	1	1	0	1	1	1	1	1	0	1	1	1	1	0	1	1	1	1	1	1	1	1	1	1
TIGR03385	TIGR03385: CoA_CoA_reduc: CoA-disulfide reductase	1	1	1	1	1	0	0	0	0	0	1	1	1	1	1	1	1	1	1	1	0	1	1	1	1	1	1	1	1	1	1	1	1	1	1	0	0	1	1	1	1	1	1	1	1	1	1	1
TIGR03392	TIGR03392: FeS_syn_CsdA: cysteine desulfurase, catalytic subunit CsdA	1	1	1	1	1	0	0	0	0	0	0	0	1	0	0	1	1	1	1	1	1	1	0	1	1	1	1	1	0	1	1	1	1	1	1	0	0	1	1	1	1	1	1	1	1	1	1	1
TIGR03402	TIGR03402: FeS_nifS: cysteine desulfurase NifS	1	1	1	1	1	0	0	1	0	0	0	0	1	0	0	1	1	1	1	1	1	1	0	1	1	1	1	1	0	1	1	1	1	1	1	0	0	1	1	1	1	1	1	1	1	1	1	1
TIGR03403	TIGR03403: nifS_epsilon: cysteine desulfurase, NifS family	1	1	1	1	1	0	0	1	0	0	0	0	1	0	0	1	1	1	1	1	1	1	0	1	1	1	1	1	0	1	1	1	1	1	1	0	0	1	1	1	1	1	1	1	1	1	1	1
TIGR03410	TIGR03410: urea_trans_UrtE: urea ABC transporter, ATP-binding protein UrtE	1	1	1	1	1	1	1	1	1	1	1	1	1	1	1	1	1	1	1	1	1	1	1	1	1	1	1	1	1	1	1	1	1	1	1	1	1	1	1	1	1	1	1	1	1	1	1	1
TIGR03411	TIGR03411: urea_trans_UrtD: urea ABC transporter, ATP-binding protein UrtD	1	1	1	1	1	1	1	1	1	1	1	1	1	1	1	1	1	1	1	1	1	1	1	1	1	1	1	1	1	1	1	1	1	1	1	1	1	1	1	1	1	1	1	1	1	1	1	1
TIGR03413	TIGR03413: GSH_gloB: hydroxyacylglutathione hydrolase	1	1	1	1	0	1	0	1	1	1	0	1	0	0	1	1	1	1	1	1	1	1	1	1	1	1	0	1	1	1	1	1	1	1	1	1	0	1	1	1	1	1	1	1	1	1	1	1
TIGR03415	TIGR03415: ABC_choXWV_ATP: choline ABC transporter, ATP-binding protein	1	1	1	1	1	1	1	1	1	1	1	1	1	1	1	1	1	1	1	1	1	1	1	1	1	1	1	1	1	1	1	1	1	1	1	1	1	1	1	1	1	1	1	1	1	1	1	1
TIGR03418	TIGR03418: chol_sulf_TF: putative choline sulfate-utilization transcription factor	0	0	1	1	1	0	0	0	0	0	0	1	0	1	0	0	1	0	0	1	1	1	1	1	1	1	0	1	1	1	1	1	1	0	0	1	1	0	1	1	1	1	1	1	1	1	1	1
TIGR03419	TIGR03419: NifU_clost: FeS cluster assembly scaffold protein NifU	1	1	1	1	1	1	1	1	0	0	0	1	1	1	0	0	1	1	1	1	1	1	1	1	1	1	1	1	1	1	1	1	1	1	1	1	1	1	1	1	1	1	1	1	1	1	1	1
TIGR03420	TIGR03420: DnaA_homol_Hda: DnaA regulatory inactivator Hda	1	1	1	1	1	0	1	0	0	1	1	1	1	1	1	1	1	1	0	1	1	1	1	1	1	1	0	1	1	1	1	1	1	0	0	1	0	1	1	1	1	1	1	1	1	1	1	1
TIGR03423	TIGR03423: pbp2_mrdA: penicillin-binding protein 2	1	1	1	1	1	1	1	1	1	1	1	1	1	1	1	1	1	1	1	1	1	1	1	1	1	1	1	1	1	1	1	1	1	0	0	1	1	1	1	1	1	1	1	1	1	1	1	1
TIGR03444	TIGR03444: gshA_related: glutamate--cysteine ligase family protein	1	1	1	1	1	1	0	1	0	0	0	1	0	1	1	0	1	0	1	1	0	1	0	0	1	1	0	1	0	1	1	1	1	1	0	1	0	0	1	1	1	1	1	1	1	1	1	1
TIGR03447	TIGR03447: mycothiol_MshC: cysteine--1-D-myo-inosityl 2-amino-2-deoxy-alpha-D-glucopyranoside ligase	1	1	0	1	1	1	1	0	1	1	0	1	1	1	0	1	1	0	1	1	1	1	0	0	0	1	1	1	0	1	1	1	1	1	0	1	1	0	1	1	1	1	1	1	1	1	1	1
TIGR03449	TIGR03449: mycothiol_MshA: D-inositol-3-phosphate glycosyltransferase	1	1	1	1	1	1	1	1	1	1	1	1	1	1	1	1	1	1	1	1	1	1	1	0	1	1	1	1	1	1	1	1	1	1	1	1	1	1	1	1	1	1	1	1	1	1	1	1
TIGR03452	TIGR03452: mycothione_red: mycothione reductase	1	1	1	1	1	0	0	0	0	0	1	1	1	1	1	1	1	1	1	1	0	1	1	1	1	1	1	1	1	1	1	1	1	1	1	0	0	1	1	1	1	1	1	1	1	1	1	1
TIGR03461	TIGR03461: pabC_Proteo: aminodeoxychorismate lyase	1	1	1	1	1	1	1	1	1	1	1	1	1	1	1	1	1	1	1	1	0	1	1	1	1	1	1	1	1	1	1	1	1	1	1	1	1	1	1	1	1	1	1	1	1	1	1	1
TIGR03481	TIGR03481: HpnM: hopanoid biosynthesis associated membrane protein HpnM	1	1	1	1	1	0	0	0	0	1	0	0	0	1	0	0	1	1	1	1	0	1	1	1	1	1	1	1	0	0	1	1	1	0	1	1	0	1	1	1	1	1	1	1	1	1	1	1
TIGR03494	TIGR03494: salicyl_syn: salicylate synthase	0	0	1	1	1	0	0	1	1	0	0	1	0	1	1	0	1	1	1	1	1	1	1	1	1	1	0	1	1	1	1	1	1	1	1	1	0	0	1	1	1	1	1	1	1	1	1	1
TIGR03496	TIGR03496: FliI_clade1: flagellar protein export ATPase FliI	1	1	1	1	0	1	1	1	1	1	0	1	1	1	0	1	1	1	1	1	1	1	1	1	1	1	1	1	1	1	1	1	1	1	1	1	1	1	1	1	1	1	1	1	1	1	1	1
TIGR03497	TIGR03497: FliI_clade2: flagellar protein export ATPase FliI	1	1	1	1	0	1	1	1	1	1	0	1	1	1	0	1	1	1	1	1	1	1	1	1	1	1	1	1	1	1	1	1	1	1	1	1	1	1	1	1	1	1	1	1	1	1	1	1
TIGR03498	TIGR03498: FliI_clade3: flagellar protein export ATPase FliI	1	1	1	1	0	1	1	1	1	1	0	1	1	1	0	1	1	1	1	1	1	1	1	1	1	1	1	1	1	1	1	1	1	1	1	1	1	1	1	1	1	1	1	1	1	1	1	1
TIGR03522	TIGR03522: GldA_ABC_ATP: gliding motility-associated ABC transporter ATP-binding subunit GldA	1	1	1	1	1	1	1	1	1	1	1	1	1	1	1	1	1	1	1	1	1	1	1	1	1	1	1	1	1	1	1	1	1	1	1	1	1	1	1	1	1	1	1	1	1	1	1	1
TIGR03526	TIGR03526: selenium_YgeY: putative selenium metabolism hydrolase	1	1	1	1	0	1	0	0	0	0	0	1	0	1	0	0	1	1	1	1	1	1	1	1	1	1	0	1	1	1	1	1	1	1	1	1	1	1	1	1	1	1	1	1	1	1	1	1
TIGR03532	TIGR03532: DapD_Ac: 2,3,4,5-tetrahydropyridine-2,6-dicarboxylate N-acetyltransferase	1	1	1	1	1	1	1	1	1	1	1	1	1	1	0	1	1	1	1	1	1	1	1	1	0	1	1	1	1	1	1	1	1	0	1	0	1	1	1	1	1	1	1	1	1	1	1	1
TIGR03537	TIGR03537: DapC: succinyldiaminopimelate transaminase	1	1	1	1	1	1	1	1	1	1	1	1	1	1	1	1	1	1	1	1	1	1	1	1	1	1	1	1	1	1	1	1	1	1	1	1	1	1	1	1	1	1	1	1	1	1	1	1
TIGR03538	TIGR03538: DapC_gpp: succinyldiaminopimelate transaminase	1	1	1	1	1	1	1	1	1	1	1	1	1	1	1	1	1	1	1	1	1	1	1	1	1	1	1	1	1	1	1	1	1	1	1	1	1	1	1	1	1	1	1	1	1	1	1	1
TIGR03539	TIGR03539: DapC_actino: succinyldiaminopimelate transaminase	1	1	1	1	1	1	1	1	1	1	1	1	1	1	1	1	1	1	1	1	1	1	1	1	1	1	1	1	1	1	1	1	1	1	1	1	1	1	1	1	1	1	1	1	1	1	1	1
TIGR03540	TIGR03540: DapC_direct: LL-diaminopimelate aminotransferase	1	1	1	1	1	1	1	1	1	1	1	1	1	1	1	1	1	1	1	1	1	1	1	1	1	1	1	1	1	1	1	1	1	1	1	1	1	1	1	1	1	1	1	1	1	1	1	1
TIGR03542	TIGR03542: DAPAT_plant: LL-diaminopimelate aminotransferase	1	1	1	1	1	1	1	1	1	1	1	1	1	1	1	1	1	1	1	1	1	1	1	1	1	1	1	1	1	1	1	1	1	1	1	1	1	1	1	1	1	1	1	1	1	1	1	1
TIGR03570	TIGR03570: NeuD_NnaD: sugar O-acyltransferase, sialic acid O-acetyltransferase NeuD family	0	0	1	1	1	1	1	1	1	1	1	1	1	1	0	1	1	1	1	1	1	1	1	1	1	1	1	1	0	1	1	1	1	1	1	1	1	1	1	1	1	1	1	1	1	1	1	1
TIGR03591	TIGR03591: polynuc_phos: polyribonucleotide nucleotidyltransferase	1	1	1	1	1	1	0	1	0	0	1	1	1	1	1	0	1	0	1	1	1	1	1	1	1	1	1	1	1	1	1	1	1	0	1	1	1	0	1	1	1	1	1	1	1	1	1	1
TIGR03593	TIGR03593: yidC_nterm: membrane protein insertase, YidC/Oxa1 family, N-terminal domain	1	1	1	1	0	0	1	1	0	0	0	1	1	1	0	1	1	1	1	1	1	1	1	1	1	1	1	1	1	1	1	1	1	0	1	1	1	0	1	1	1	1	1	1	1	1	1	1
TIGR03600	TIGR03600: phage_DnaB: phage replicative helicase, DnaB family	1	1	1	1	1	0	0	0	0	1	0	1	1	1	0	1	1	1	1	1	0	1	0	0	1	1	0	1	1	1	1	1	1	0	1	0	0	0	1	1	1	1	1	1	1	1	1	1
TIGR03608	TIGR03608: L_ocin_972_ABC: putative bacteriocin export ABC transporter, lactococcin 972 group	1	1	1	1	1	1	1	1	1	1	1	1	1	1	1	1	1	1	1	1	1	1	1	1	1	1	1	1	1	1	1	1	1	1	1	1	1	1	1	1	1	1	1	1	1	1	1	1
TIGR03625	TIGR03625: L3_bact: 50S ribosomal protein L3	1	1	1	1	1	0	0	1	1	1	0	1	1	1	1	1	0	1	0	1	0	1	1	1	1	1	1	1	1	1	1	1	1	1	1	1	1	1	1	1	1	1	1	1	1	1	1	1
TIGR03627	TIGR03627: arch_S9P: archaeal ribosomal protein S9P	1	1	1	1	1	0	0	1	0	0	0	1	0	0	0	0	1	1	1	1	1	1	0	1	1	1	1	1	1	1	1	0	1	0	1	1	1	1	1	1	1	1	1	1	1	1	0	1
TIGR03628	TIGR03628: arch_S11P: archaeal ribosomal protein S11P	1	1	1	1	1	1	1	1	1	1	1	1	1	1	1	0	1	1	1	1	1	1	1	1	1	1	1	1	1	1	1	0	1	0	1	1	0	1	1	1	1	1	1	1	1	1	1	1
TIGR03630	TIGR03630: arch_S17P: archaeal ribosomal protein S17P	1	1	1	1	1	1	1	1	1	1	1	1	1	1	1	1	1	1	1	1	0	1	1	1	1	1	0	1	0	1	1	1	1	1	1	1	0	0	1	1	1	1	1	1	1	1	1	1
TIGR03631	TIGR03631: bact_S13: 30S ribosomal protein S13	1	1	1	1	1	1	1	1	1	1	1	1	1	1	1	0	1	1	1	1	1	1	1	1	1	1	1	1	1	1	1	0	1	0	1	1	0	1	1	1	1	1	1	1	1	1	1	1
TIGR03632	TIGR03632: bact_S11: 30S ribosomal protein S11	1	1	1	1	1	1	1	1	1	1	1	1	1	1	1	0	1	1	1	1	1	1	1	1	1	1	1	1	1	1	1	0	1	0	1	1	0	1	1	1	1	1	1	1	1	1	1	1
TIGR03635	TIGR03635: S17_bact: 30S ribosomal protein S17	1	1	1	1	1	1	1	1	1	1	1	1	1	1	1	1	1	1	1	1	0	1	1	1	1	1	0	1	0	1	1	1	1	1	1	1	0	0	1	1	1	1	1	1	1	1	1	1
TIGR03636	TIGR03636: L23_arch: archaeal ribosomal protein L23	1	1	1	1	1	1	1	1	1	1	1	1	1	1	1	1	1	1	0	1	0	1	1	1	1	1	1	1	1	1	1	1	1	1	1	1	1	1	1	1	1	1	1	1	1	1	1	1
TIGR03643	TIGR03643: TIGR03643: TIGR03643 family protein	1	1	1	0	1	0	0	0	0	0	1	0	1	1	0	0	1	1	1	1	1	1	0	1	1	1	1	1	1	1	1	1	1	0	0	1	1	0	1	1	1	1	1	1	1	1	1	1
TIGR03653	TIGR03653: arch_L6P: archaeal ribosomal protein L6P	1	1	1	1	1	0	0	1	1	1	1	1	1	1	1	0	1	1	1	1	0	1	1	1	1	1	1	1	1	1	1	0	1	0	1	1	0	1	1	1	1	1	1	1	1	1	1	1
TIGR03654	TIGR03654: L6_bact: ribosomal protein L6	1	1	1	1	1	0	0	1	1	1	1	1	1	1	1	0	1	1	1	1	1	1	1	1	1	1	1	1	1	1	1	0	1	0	1	1	0	1	1	1	1	1	1	1	1	1	1	1
TIGR03673	TIGR03673: rpl14p_arch: 50S ribosomal protein L14P	1	1	1	1	1	1	1	1	1	1	1	1	1	1	1	1	1	1	1	1	0	1	1	1	1	1	0	1	1	1	1	1	1	0	1	1	0	0	1	1	1	1	1	1	1	1	1	1
TIGR03680	TIGR03680: eif2g_arch: translation initiation factor 2, gamma subunit	1	1	1	1	1	0	1	1	0	0	1	1	0	1	1	1	1	0	1	1	1	1	0	1	1	1	1	1	1	1	1	1	1	0	0	0	1	0	1	1	1	1	1	1	1	1	1	1
TIGR03683	TIGR03683: A-tRNA_syn_arch: alanine--tRNA ligase	1	1	1	1	1	0	0	1	0	1	0	1	1	1	1	1	1	1	1	1	1	1	1	1	1	1	0	1	0	1	1	1	1	0	0	1	0	1	1	1	1	1	1	1	1	1	0	1
TIGR03714	TIGR03714: secA2: accessory Sec system translocase SecA2	1	1	1	1	1	0	0	0	1	0	1	1	1	1	1	1	0	0	1	1	1	1	1	0	1	1	1	1	1	1	1	1	1	0	0	1	1	1	1	1	1	1	1	1	1	1	1	1
TIGR03740	TIGR03740: galliderm_ABC: lantibiotic protection ABC transporter, ATP-binding subunit	1	1	1	1	1	1	1	1	1	1	1	1	1	1	1	1	1	1	1	1	1	1	1	1	1	1	1	1	1	1	1	1	1	1	1	1	1	1	1	1	1	1	1	1	1	1	1	1
TIGR03771	TIGR03771: anch_rpt_ABC: anchored repeat-type ABC transporter, ATP-binding subunit	1	1	1	1	1	1	1	1	1	1	1	1	1	1	1	1	1	1	1	1	1	1	1	1	1	1	1	1	1	1	1	1	1	1	1	1	1	1	1	1	1	1	1	1	1	1	1	1
TIGR03787	TIGR03787: marine_sort_RR: proteobacterial dedicated sortase system response regulator	1	1	1	1	1	1	1	1	1	1	1	1	1	1	1	1	1	1	1	1	1	1	1	1	1	1	1	1	1	1	1	1	1	1	1	1	1	1	1	1	1	1	1	1	1	1	1	1
TIGR03861	TIGR03861: phenyl_ABC_PedC: alcohol ABC transporter, permease protein	1	1	1	1	0	1	1	1	1	0	1	1	1	1	0	1	0	1	1	1	1	1	1	0	1	1	1	1	1	1	1	1	1	1	1	1	1	1	1	1	1	1	1	1	1	1	1	1
TIGR03864	TIGR03864: PQQ_ABC_ATP: ABC transporter, ATP-binding subunit, PQQ-dependent alcohol dehydrogenase system	1	1	1	1	1	1	1	1	1	1	1	1	1	1	1	1	1	1	1	1	1	1	1	1	1	1	1	1	1	1	1	1	1	1	1	1	1	1	1	1	1	1	1	1	1	1	1	1
TIGR03873	TIGR03873: F420-0_ABC_ATP: proposed F420-0 ABC transporter, ATP-binding protein	1	1	1	1	1	1	1	1	1	1	1	1	1	1	1	1	1	1	1	1	1	1	1	1	1	1	1	1	1	1	1	1	1	1	1	1	1	1	1	1	1	1	1	1	1	1	1	1
TIGR03914	TIGR03914: UDG_fam_dom: uracil-DNA glycosylase family domain	1	1	1	1	1	1	1	1	1	1	1	0	1	1	1	1	1	1	1	1	1	1	1	1	1	1	1	1	1	1	1	1	1	1	1	1	0	0	1	1	1	1	1	1	1	1	0	1
TIGR03947	TIGR03947: viomycin_VioD: capreomycidine synthase	1	1	1	1	1	1	1	1	1	1	1	1	1	1	1	1	1	1	1	1	1	1	1	1	1	1	1	1	1	1	1	1	1	1	1	1	1	1	1	1	1	1	1	1	1	1	1	1
TIGR03953	TIGR03953: rplD_bact: 50S ribosomal protein L4	1	1	1	1	1	0	1	0	1	1	1	1	1	1	1	1	1	1	0	1	0	1	1	1	1	1	0	1	1	1	1	1	1	1	1	1	1	1	1	1	1	1	1	1	1	1	1	1
TIGR03966	TIGR03966: actino_HemFlav: heme/flavin dehydrogenase, mycofactocin system	1	1	1	1	1	0	1	0	1	1	0	1	1	1	0	1	1	1	1	1	1	0	1	1	1	1	1	1	1	1	1	1	1	1	0	1	1	0	1	1	1	1	1	1	1	1	1	1
TIGR03971	TIGR03971: SDR_subfam_1: oxidoreductase, SDR family	1	1	1	1	1	1	1	1	1	1	1	1	1	1	1	1	1	1	1	1	1	1	1	1	1	1	1	1	1	1	1	1	1	1	1	1	1	1	1	1	1	1	1	1	1	1	1	1
TIGR03990	TIGR03990: Arch_GlmM: phosphoglucosamine mutase	1	1	1	1	1	1	1	1	0	0	1	1	1	1	0	1	1	0	1	1	1	1	1	1	1	1	1	1	1	1	1	1	1	1	1	1	1	1	1	1	1	1	1	1	1	1	1	1
TIGR03999	TIGR03999: thiol_BshA: N-acetyl-alpha-D-glucosaminyl L-malate synthase BshA	1	1	1	1	1	1	1	1	1	1	1	1	1	1	1	1	1	1	1	1	1	1	1	0	1	1	1	1	1	1	1	1	1	1	1	0	1	1	1	1	1	1	1	1	1	1	1	1
TIGR04013	TIGR04013: B12_SAM_MJ_1487: B12-binding domain/radical SAM domain protein, MJ_1487 family	1	1	1	1	1	0	0	1	0	0	0	1	0	1	1	1	1	1	1	1	1	1	1	1	1	1	1	1	1	1	1	1	1	1	1	1	1	1	1	1	1	1	1	1	1	1	1	1
TIGR04018	TIGR04018: Bthiol_YpdA: putative bacillithiol system oxidoreductase, YpdA family	1	1	0	1	1	1	1	1	1	1	1	1	1	1	1	1	1	1	1	1	1	1	1	1	1	1	1	1	1	1	1	1	1	0	1	1	1	1	1	1	1	1	1	1	1	1	1	1
TIGR04026	TIGR04026: PPOX_FMN_cyano: PPOX class probable FMN-dependent enzyme, alr4036 family	1	1	1	1	1	1	1	1	1	1	1	1	1	1	0	1	1	1	1	1	1	1	1	1	1	1	1	1	1	1	1	1	1	1	1	1	1	1	1	1	1	1	1	1	1	1	1	1
TIGR04063	TIGR04063: stp3: PEP-CTERM/exosortase A-associated glycosyltransferase, Daro_2409 family	0	0	0	1	1	1	1	1	1	1	1	1	1	1	1	1	1	1	1	1	1	1	1	0	0	1	0	1	1	1	1	1	1	1	1	1	1	1	1	1	1	1	1	1	1	1	1	1
TIGR04157	TIGR04157: glyco_rSAM_CFB: glycosyltransferase, GG-Bacteroidales peptide system	1	1	1	1	1	1	1	1	1	1	1	1	1	1	1	1	1	1	1	1	1	1	1	0	1	1	1	1	1	1	1	1	1	1	1	0	1	1	1	1	1	1	1	1	1	1	1	1
TIGR04217	TIGR04217: archae_ser_T: archaetidylserine synthase	0	0	1	1	0	0	0	0	0	1	0	1	0	1	0	1	1	1	1	1	1	1	1	0	1	1	0	1	1	1	1	1	1	0	0	1	0	0	1	1	1	1	1	1	1	1	1	1
TIGR04221	TIGR04221: SecA2_Mycobac: accessory Sec system translocase SecA2	1	1	1	1	1	0	0	0	1	0	1	1	1	1	1	1	0	0	1	1	1	1	1	0	1	1	1	1	1	1	1	1	1	0	0	1	1	1	1	1	1	1	1	1	1	1	1	1
TIGR04284	TIGR04284: aldehy_Rv0768: aldehyde dehydrogenase, Rv0768 family	1	1	1	1	1	1	1	1	1	1	0	1	1	1	1	1	1	1	1	1	1	1	1	1	1	1	1	1	1	1	1	1	1	1	1	1	1	1	1	1	1	1	1	1	1	1	1	1
[truncated: 249 more columns]

## Sheet: S4_ANI
Table S4: Average nucleotide identity (ANI) matrix of all genomes used in this study. SAR11 lineages I-IIIa and species IIIb.1-16 are color-coded as in Fig. 1. Proposed species boundaries are shown with bold borders.
	Genome_ID	GTDB Taxonomy	Proposed taxonomy	Group	MED605	MED-G108	3300020262_24	MED-G107	SCGC_AAA795-D22	SCGC_AAA795-M22	SCGC_AAA795-F16	AG-426-E17	3300027685-46	SCGC_AAA795-M18	RS40	GOM-A1	AG-470-G21	HTCC9565	P. Giovannonii	HTCC1062	HTCC1002	SFB_27D_13Oct24_20_ms_bin_5	HTCC1040	HTCC1013	HIMB5	SCGC_AAA795-C09	AG-918-P15	SFB_34D_13Oct24_05_ms_bin_2	SFB_27D_13Oct24_20_ms_bin_12	SCGC_AAA795-O20	RS39	SCGC_AAA795-L23	AG-426-G02	TMED239	HTCC7214	HTCC7211	SFB_34D_13Oct24_05_ms_bin_3	HTCC9022	HTCC8051	AG-430-E20	SCGC_AAA795-A20	HIMB083	SCGC_AAA797-I19	SCGC_AAA795-O19	SCGC_AAA795-P11	SCGC_AAA795-J21	N-LaCa2-17jan24-061	cas-50m-174	BACL5_MAG-120820-bin39
1	MED605	d__Bacteria;p__Pseudomonadota;c__Alphaproteobacteria;o__Pelagibacterales;f__Pelagibacteraceae;g__GCA-2689925;s__GCA-2689925 sp002689925		SAR11-I	100	72.59	70.49	72.85	69.46	69.24	70.03	69.74	70.64	69.99	69.95	70.05	69.49	70.85	70.86	70.98	70.97	70.72	71.01	70.99	70.38	70.5	70.79	70.42	70.26	70.24	70.13	69.1	70.41	70.26	70.74	70.57	70.64	70.51	70.58	70.25	69.87	70.31	70.36	70.37	70.29	70.61	70.79	70.78	70.68
2	MED-G108	d__Bacteria;p__Pseudomonadota;c__Alphaproteobacteria;o__Pelagibacterales;f__Pelagibacteraceae;g__AG-414-E02;s__AG-414-E02 sp004213215		SAR11-I	72.73	100	72	71.57	69.06	68.76	69.55	68.92	70.77	69.45	69.25	69.26	68.92	69.54	69.34	69.38	69.41	69.16	69.4	69.4	69.2	68.95	69.43	69.46	68.93	69.18	69.14	68.23	69.43	69.97	69.61	69.68	69.1	69.3	69.45	69.14	69.44	69.58	69.58	69.92	69.56	69.67	69.8	69.83	69.56
3	3300020262_24	d__Bacteria;p__Pseudomonadota;c__Alphaproteobacteria;o__Pelagibacterales;f__Pelagibacteraceae;g__AAA240-E13;s__AAA240-E13 sp002690285		SAR11-I	70.65	71.98	100	71.61	68.7	68.5	69.06	68.55	70.81	69.23	69.17	69.46	68.92	69.31	69.49	69.49	69.43	69.22	69.56	69.45	69.41	69.19	69.56	69.4	69.28	69.53	69.13	68.46	69.16	69.58	69.53	69.51	69.16	69.33	69.33	69.27	69.29	69.47	69.4	69.43	69.7	69.61	69.72	69.76	69.69
4	MED-G107	d__Bacteria;p__Pseudomonadota;c__Alphaproteobacteria;o__Pelagibacterales;f__Pelagibacteraceae;g__MED-G107;s__MED-G107 sp004213155		SAR11-I	72.95	71.6	71.61	100	72.24	71.54	72.56	72.1	73.64	73.68	73.08	72.77	72.28	74.75	74.81	74.7	74.73	74.44	74.75	74.71	73.59	73.73	73.99	73.66	73.23	73.61	73.29	72.15	73.41	74.29	74.64	74.71	73.8	74.17	74.33	73.38	73.88	74.03	73.94	74.63	73.73	74.18	74.36	73.82	74.12
5	SCGC_AAA795-D22	d__Bacteria;p__Pseudomonadota;c__Alphaproteobacteria;o__Pelagibacterales;f__Pelagibacteraceae;g__Pelagibacter;s__Pelagibacter sp902587665		SAR11-I	69.38	69.25	68.6	72.44	100	72.19	73.21	72.49	72.51	73.08	73.33	72.71	72.46	72.5	72.66	72.84	72.86	72.19	72.83	72.8	72.41	73.08	73.36	72.35	72.03	72.67	73.07	71.78	73.25	72.54	73.04	73.05	72.32	72.58	72.55	72.42	72.73	72.9	72.89	73.32	72.93	73.21	73.13	72.66	72.82
6	SCGC_AAA795-M22	d__Bacteria;p__Pseudomonadota;c__Alphaproteobacteria;o__Pelagibacterales;f__Pelagibacteraceae;g__Pelagibacter;s__Pelagibacter ubique_K		SAR11-I	69.47	68.99	68.5	71.67	72.23	100	75.16	74.79	71.78	72.2	72.37	72.2	71.8	71.73	71.95	71.94	71.93	71.49	71.87	71.96	71.86	72.74	72.34	71.81	71.43	71.84	72.2	71.09	72.59	71.69	72.27	72.28	71.49	71.84	71.83	71.8	71.32	71.65	71.84	71.43	71.86	72.39	71.95	72.2	72.14
7	SCGC_AAA795-F16	d__Bacteria;p__Pseudomonadota;c__Alphaproteobacteria;o__Pelagibacterales;f__Pelagibacteraceae;g__Pelagibacter;s__Pelagibacter ubique_J		SAR11-I	70.19	69.43	69.19	72.49	72.97	75.18	100	83.69	72.47	73.32	73.26	73.27	72.46	72.3	72.38	72.31	72.34	71.82	72.4	72.33	72.57	72.85	72.96	72.55	72.29	73.16	73.11	72.1	73.08	72.76	72.72	72.66	71.79	72.27	72.22	72.57	72.16	72.48	72.5	72.43	72.73	72.6	72.56	72.17	72.62
8	AG-426-E17	d__Bacteria;p__Pseudomonadota;c__Alphaproteobacteria;o__Pelagibacterales;f__Pelagibacteraceae;g__Pelagibacter;s__Pelagibacter sp003210095		SAR11-I	69.79	69.01	68.58	72.3	72.65	74.75	83.88	100	71.99	72.21	72.32	72.63	72.16	71.9	71.93	71.92	71.93	71.38	71.97	71.91	71.92	72.38	72.73	71.71	71.41	72.22	72.4	71.05	72.5	72.44	72.17	72.18	71.61	71.78	71.79	72.16	71.68	71.95	72.27	71.78	72.29	72.34	72.11	72.11	72.09
9	3300027685-46	d__Bacteria;p__Pseudomonadota;c__Alphaproteobacteria;o__Pelagibacterales;f__Pelagibacteraceae;g__Pelagibacter;s__Pelagibacter sp012963775		SAR11-I	70.57	70.74	70.5	73.67	71.94	71.46	72.09	71.61	100	72.91	73.13	73.02	72.35	72.89	73.06	73.15	73.23	73.18	73.24	73.25	72.45	72.62	72.88	73.16	73.01	72.23	72.43	71.3	72.51	73.16	72.77	72.78	72.97	72.75	72.84	72.51	72.67	73.01	72.75	72.86	72.86	72.75	73.19	73.05	73.29
10	SCGC_AAA795-M18	d__Bacteria;p__Pseudomonadota;c__Alphaproteobacteria;o__Pelagibacterales;f__Pelagibacteraceae;g__Pelagibacter;s__Pelagibacter sp002101295		SAR11-I	69.93	69.28	69.2	73.49	73	72.23	73.08	72.33	73.23	100	96.09	76.22	75.71	72.97	72.77	73.04	72.97	72.46	73.03	73.02	73.55	73.29	73.31	72.78	72.37	73.59	73.59	72.29	73.64	73.43	74.16	73.99	72.65	73.09	73.32	73.66	73.53	73.82	73.66	73.78	73.84	74.11	73.53	73.14	73.36
11	RS40	d__Bacteria;p__Pseudomonadota;c__Alphaproteobacteria;o__Pelagibacterales;f__Pelagibacteraceae;g__Pelagibacter;s__Pelagibacter sp002101295		SAR11-I	69.95	69.48	69.18	73.09	72.95	72.09	72.84	72.23	73.36	96	100	75.97	75.55	73.19	73.01	73.16	73.19	72.77	73.19	73.16	73.63	73.39	73.34	72.93	72.83	73.54	73.6	72.62	73.52	73.19	74.23	74.14	73.36	73.33	73.56	73.54	73.59	73.98	73.87	74.09	74.05	74.03	73.66	73.31	73.43
12	GOM-A1	d__Bacteria;p__Pseudomonadota;c__Alphaproteobacteria;o__Pelagibacterales;f__Pelagibacteraceae;g__Pelagibacter;s__Pelagibacter sp001704065		SAR11-I	70.09	69.22	69.46	72.75	72.63	72.01	73.16	72.37	73.23	76.2	75.99	100	84.9	72.84	72.77	72.8	72.8	72.33	72.86	72.86	73.05	72.77	73.25	72.78	72.4	72.89	73.23	72.21	73.32	72.86	73.56	73.71	72.64	73.04	73.33	73.49	73.37	73.49	73.38	73.75	73.77	74.17	73.02	72.71	72.98
13	AG-470-G21	d__Bacteria;p__Pseudomonadota;c__Alphaproteobacteria;o__Pelagibacterales;f__Pelagibacteraceae;g__Pelagibacter;s__Pelagibacter sp003211555		SAR11-I	69.58	69.08	68.76	72.33	72.19	71.46	72.18	71.96	72.74	75.6	75.53	85.34	100	72.38	72.37	72.36	72.31	72.03	72.39	72.33	72.58	72.7	72.65	72.48	72.23	72.68	72.68	71.9	72.81	73.02	73.09	73.15	72.39	72.45	72.81	72.69	72.71	72.81	72.6	73.41	73.46	73.23	72.88	72.72	72.69
14	HTCC9565	d__Bacteria;p__Pseudomonadota;c__Alphaproteobacteria;o__Pelagibacterales;f__Pelagibacteraceae;g__Pelagibacter;s__Pelagibacter ubique_S		SAR11-I	70.97	69.59	69.06	75	72.38	71.62	72.36	71.78	73.31	72.93	73.1	72.83	72.49	100	84.17	83.03	83.1	83.09	83.17	83.02	74.9	75.33	75.29	75.63	75.7	75.08	75.08	73.84	75.13	76.01	76.94	76.88	76.71	77.07	76.96	75.77	75.67	75.77	75.75	75.64	75.89	75.84	76.03	76.19	76.39
15	P. Giovannonii	d__Bacteria;p__Pseudomonadota;c__Alphaproteobacteria;o__Pelagibacterales;f__Pelagibacteraceae;g__Pelagibacter;s__Pelagibacter giovannonii		SAR11-I	70.74	69.44	69.38	74.74	72.68	71.73	72.39	71.84	73.52	72.73	72.93	72.73	72.3	84.16	100	90.03	89.92	89.99	90.11	89.77	75	75.09	75.12	75.66	75.67	75.04	74.9	73.95	74.94	75.94	76.69	76.56	76.5	77.06	76.99	75.5	75.61	75.78	75.73	75.57	75.72	75.55	75.99	76.31	76.23
16	HTCC1062	d__Bacteria;p__Pseudomonadota;c__Alphaproteobacteria;o__Pelagibacterales;f__Pelagibacteraceae;g__Pelagibacter;s__Pelagibacter ubique		SAR11-I	71.04	69.45	69.47	74.75	72.86	71.8	72.21	71.76	73.49	72.96	73.09	72.82	72.48	83	90.04	100	98	97.14	96.99	98.14	75.31	75.44	75.33	75.75	75.74	75.2	75.01	74	75.16	75.57	76.78	76.68	76.78	77.3	77.04	75.64	75.95	76.07	75.71	75.69	75.84	75.79	76.28	76.17	76.49
17	HTCC1002	d__Bacteria;p__Pseudomonadota;c__Alphaproteobacteria;o__Pelagibacterales;f__Pelagibacteraceae;g__Pelagibacter;s__Pelagibacter ubique		SAR11-I	70.94	69.47	69.38	74.83	72.81	71.7	72.43	71.82	73.56	72.92	73.25	72.76	72.39	83.13	90.08	98.02	100	97.1	96.98	97.5	75.21	75.4	75.47	75.71	75.74	75.09	75.04	73.89	75.11	75.6	76.9	76.8	76.74	77.34	76.94	75.71	75.93	76	75.82	75.77	75.95	75.87	76.38	76.47	76.63
18	SFB_27D_13Oct24_20_ms_bin_5	d__Bacteria;p__Pseudomonadota;c__Alphaproteobacteria;o__Pelagibacterales;f__Pelagibacteraceae;g__Pelagibacter;s__Pelagibacter ubique		SAR11-I	70.57	68.99	69.08	74.17	72.21	71.26	71.88	71.19	73.44	72.51	72.86	72.42	72.16	82.87	89.7	96.62	96.75	100	96.6	96.73	75.04	75.08	74.77	75.39	75.44	74.59	74.56	73.82	74.63	75.67	76.56	76.2	76.92	76.96	76.68	75.13	75.45	75.68	75.52	75.52	75.75	75.6	76.05	76.13	76.41
19	HTCC1040	d__Bacteria;p__Pseudomonadota;c__Alphaproteobacteria;o__Pelagibacterales;f__Pelagibacteraceae;g__Pelagibacter;s__Pelagibacter ubique		SAR11-I	70.97	69.4	69.52	74.7	72.81	71.68	72.38	71.85	73.52	73.06	73.16	72.84	72.37	83.1	89.98	96.95	96.96	97.24	100	97.06	75.37	75.47	75.45	75.86	75.79	75.24	75.04	74.05	75.06	75.67	76.78	76.73	76.69	77.4	76.97	75.61	75.81	76.02	75.98	75.58	75.88	75.9	76.34	76.35	76.55
20	HTCC1013	d__Bacteria;p__Pseudomonadota;c__Alphaproteobacteria;o__Pelagibacterales;f__Pelagibacteraceae;g__Pelagibacter;s__Pelagibacter ubique		SAR11-I	70.89	69.39	69.43	74.51	72.71	71.59	72.3	71.77	73.55	73.03	73.19	72.9	72.49	82.99	89.7	98.29	97.57	97.52	97.11	100	75.23	75.31	75.5	75.74	75.76	75.28	75.03	74.08	75.04	75.45	76.72	76.8	76.79	77.36	76.99	75.65	75.94	76.01	75.85	75.88	75.91	75.84	76.29	76.19	76.54
21	HIMB5	d__Bacteria;p__Pseudomonadota;c__Alphaproteobacteria;o__Pelagibacterales;f__Pelagibacteraceae;g__Pelagibacter;s__Pelagibacter sp000299095		SAR11-I	70.6	69.45	69.36	73.58	72.31	71.74	72.61	71.81	72.62	73.5	73.57	72.99	72.59	74.92	75.11	75.24	75.17	74.92	75.34	75.25	100	76.45	76.16	76.62	76.34	76.19	75.97	74.57	76.23	75.26	76.36	76.31	76.21	76.22	76.12	75.77	76.3	76.5	76.42	76.12	76.67	76.55	76.68	76.21	76.74
22	SCGC_AAA795-C09	d__Bacteria;p__Pseudomonadota;c__Alphaproteobacteria;o__Pelagibacterales;f__Pelagibacteraceae;g__Pelagibacter;s__Pelagibacter ubique_N		SAR11-I	70.56	68.94	69.16	73.72	73.13	72.16	72.77	72.12	72.9	73.37	73.44	72.96	72.88	75.67	75.38	75.59	75.49	75.09	75.52	75.52	76.66	100	79.4	76.76	76.72	79.21	79.39	78.03	80.95	76.81	77.42	77.54	77.44	77.09	77.27	76.61	77.8	77.7	77.5	78.07	77.64	77.54	77.11	76.43	77.08
23	AG-918-P15	d__Bacteria;p__Pseudomonadota;c__Alphaproteobacteria;o__Pelagibacterales;f__Pelagibacteraceae;g__Pelagibacter;s__Pelagibacter ubique_E		SAR11-I	70.76	69.43	69.39	73.91	73.07	71.94	72.75	72.67	73.03	73.22	73.32	73.34	72.78	75.37	75.27	75.33	75.43	74.74	75.35	75.4	76.24	79.4	100	78.35	78.07	81.13	78.96	77.63	78.63	76.96	77.45	77.43	77.06	76.88	77.08	76.79	77.37	77.4	76.81	77.46	77.65	77.59	76.58	76.9	76.77
24	SFB_34D_13Oct24_05_ms_bin_2	d__Bacteria;p__Pseudomonadota;c__Alphaproteobacteria;o__Pelagibacterales;f__Pelagibacteraceae;g__Pelagibacter;s__Pelagibacter sp008638165		SAR11-I	70.71	69.52	69.33	73.64	72.43	71.72	72.51	71.75	73.13	72.63	72.95	72.83	72.51	75.62	75.56	75.8	75.78	75.4	75.81	75.85	76.71	76.57	78.45	100	96.71	77.91	76.4	75.61	76.43	75.52	77.2	77.24	77.45	77.24	77.24	76.53	76.54	76.88	76.8	76.54	76.82	77.13	77.78	78.02	77.86
25	SFB_27D_13Oct24_20_ms_bin_12	d__Bacteria;p__Pseudomonadota;c__Alphaproteobacteria;o__Pelagibacterales;f__Pelagibacteraceae;g__Pelagibacter;s__Pelagibacter sp008638165		SAR11-I	70.11	69.03	69.19	73.07	72.29	71.29	72.49	71.46	73.18	72.48	72.86	72.64	72.2	75.73	75.75	75.97	75.92	75.65	75.91	75.89	76.45	76.75	78.08	95.38	100	77.89	76.51	75.61	76.63	75.27	78.12	78.11	83.11	79.35	78.73	76.81	77.14	77.45	77.45	77.37	77.58	77.34	77.61	77.86	77.64
26	SCGC_AAA795-O20	d__Bacteria;p__Pseudomonadota;c__Alphaproteobacteria;o__Pelagibacterales;f__Pelagibacteraceae;g__Pelagibacter;s__Pelagibacter ubique_F		SAR11-I	70.29	69.35	69.34	73.63	72.8	71.67	73.13	72.18	72.73	73.63	73.51	73.1	72.86	75.25	75.13	75.26	75.22	74.71	75.31	75.24	76.35	79.26	81.23	77.99	77.81	100	79.17	77.67	78.46	76.4	77.22	77.17	77.14	77.01	76.88	76.71	77.83	77.64	77.27	77.85	78.35	77.62	76.47	76.11	76.53
27	RS39	d__Bacteria;p__Pseudomonadota;c__Alphaproteobacteria;o__Pelagibacterales;f__Pelagibacteraceae;g__Pelagibacter;s__Pelagibacter sp002101315		SAR11-I	70.37	69.4	69.21	73.36	73.06	72.14	73.07	72.2	72.64	73.54	73.56	73.39	72.77	75.13	75.03	75.07	75.06	74.65	75.1	75.05	76.11	79.28	79.06	76.46	76.39	79.18	100	79.58	79.68	76.5	77.11	77.07	76.7	76.57	76.72	76.56	76.79	76.91	76.51	76.88	77.24	77.09	76.34	76.08	76.4
28	SCGC_AAA795-L23	d__Bacteria;p__Pseudomonadota;c__Alphaproteobacteria;o__Pelagibacterales;f__Pelagibacteraceae;g__Pelagibacter;s__Pelagibacter ubique_G		SAR11-I	69.16	68.46	68.12	72.17	71.92	71.01	71.88	71.15	71.95	72.45	72.57	72.42	71.89	74.05	74.02	74.18	74.16	74.07	74.13	74.18	74.84	78.09	77.57	75.62	75.58	77.67	79.38	100	78.96	76.01	76.12	76.16	75.8	75.62	75.79	75.72	75.85	75.91	75.31	76.24	76.22	75.76	75.58	75.91	75.98
29	AG-426-G02	d__Bacteria;p__Pseudomonadota;c__Alphaproteobacteria;o__Pelagibacterales;f__Pelagibacteraceae;g__Pelagibacter;s__Pelagibacter sp003213155		SAR11-I	70.5	69.37	69.01	73.51	73.01	72.36	72.86	72.23	72.84	73.68	73.57	73.47	72.81	75.12	74.99	75.01	74.98	74.53	75.03	75.05	76.17	80.91	78.66	76.44	76.44	78.39	79.71	78.64	100	76.5	77.06	76.94	76.48	76.35	76.48	76.43	76.61	76.8	76.45	76.7	76.96	76.86	76.46	76.15	76.49
30	TMED239	d__Bacteria;p__Pseudomonadota;c__Alphaproteobacteria;o__Pelagibacterales;f__Pelagibacteraceae;g__Pelagibacter;s__Pelagibacter sp002169475		SAR11-I	70.98	70.59	69.65	74.68	72.77	71.76	72.94	72.4	73.51	73.74	73.58	73.29	73.15	75.9	75.8	75.65	75.57	75.39	75.72	75.61	75.35	76.82	77.03	75.56	75.18	76.52	76.42	76.14	76.4	100	78.08	78.18	78.2	77.75	77.98	76.89	78.23	77.82	77.17	78.2	78.28	77.27	76.14	75.6	76.14
31	HTCC7214	d__Bacteria;p__Pseudomonadota;c__Alphaproteobacteria;o__Pelagibacterales;f__Pelagibacteraceae;g__Pelagibacter;s__		SAR11-I	70.91	69.71	69.36	74.56	72.92	72.12	72.72	72.01	73.11	74.01	74.18	73.68	73.13	76.9	76.66	76.73	76.72	76.52	76.82	76.79	76.27	77.26	77.37	77.12	77.96	76.85	76.9	75.91	76.98	78.58	100	93.07	81.72	81.99	82.21	79.31	79.73	79.97	79.12	79.86	79.91	79.84	77.44	77.62	77.95
32	HTCC7211	d__Bacteria;p__Pseudomonadota;c__Alphaproteobacteria;o__Pelagibacterales;f__Pelagibacteraceae;g__Pelagibacter;s__Pelagibacter sp000155895		SAR11-I	70.71	69.77	69.31	74.6	72.93	72.05	72.58	72.04	73.04	74.03	74.11	73.74	73.19	76.84	76.68	76.62	76.64	76.22	76.67	76.66	76.23	77.47	77.29	77.19	77.93	76.87	76.82	75.85	76.85	78.71	93.16	100	81.88	81.83	82.14	79.61	79.74	79.79	79.05	79.82	79.66	79.66	77.29	77.46	77.71
33	SFB_34D_13Oct24_05_ms_bin_3	d__Bacteria;p__Pseudomonadota;c__Alphaproteobacteria;o__Pelagibacterales;f__Pelagibacteraceae;g__Pelagibacter;s__Pelagibacter sp017880265		SAR11-I	70.94	69.27	69.1	73.73	72.36	71.36	71.59	71.39	73.1	72.86	73.22	72.85	72.49	76.62	76.34	76.68	76.73	76.7	76.72	76.7	76.32	77.33	77.07	77.58	83.09	76.96	76.55	75.7	76.53	78.61	81.91	81.78	100	86.02	85.74	78.81	79.89	79.98	79.42	79.6	79.43	79.95	77.83	77.78	78.01
34	HTCC9022	d__Bacteria;p__Pseudomonadota;c__Alphaproteobacteria;o__Pelagibacterales;f__Pelagibacteraceae;g__Pelagibacter;s__		SAR11-I	70.77	69.44	69.21	73.98	72.45	71.71	72.2	71.65	72.99	73.09	73.34	73.1	72.57	77.02	77.05	77.3	77.3	76.82	77.36	77.23	76.14	76.86	76.85	77.13	79.3	76.82	76.3	75.4	76.29	77.92	82	81.88	86.38	100	86.49	78.79	79.63	79.84	79.04	79.17	79.57	79.65	77.62	77.44	77.85
35	HTCC8051	d__Bacteria;p__Pseudomonadota;c__Alphaproteobacteria;o__Pelagibacterales;f__Pelagibacteraceae;g__Pelagibacter;s__		SAR11-I	70.48	69.62	69.24	74.23	72.31	71.66	72.08	71.52	72.95	73.15	73.36	73.28	72.74	76.91	76.93	76.89	76.87	76.58	76.87	76.85	75.91	77.07	77.15	77.12	78.61	76.83	76.45	75.46	76.41	78.18	82.19	82.09	86.17	86.44	100	79.11	80.07	80	78.87	79.53	79.85	79.95	77.29	77.5	77.73
36	AG-430-E20	d__Bacteria;p__Pseudomonadota;c__Alphaproteobacteria;o__Pelagibacterales;f__Pelagibacteraceae;g__Pelagibacter;s__Pelagibacter sp003209915		SAR11-I	70.3	69.33	69.15	73.39	72.58	71.81	72.56	72.07	72.89	73.76	73.62	73.56	72.93	75.77	75.63	75.65	75.68	75.14	75.64	75.63	75.97	76.66	76.83	76.53	76.74	76.64	76.41	75.57	76.44	77.18	79.34	79.76	78.92	78.86	79.06	100	79.77	79.74	79.21	80.12	80.04	79.66	76.6	76.53	76.78
37	SCGC_AAA795-A20	d__Bacteria;p__Pseudomonadota;c__Alphaproteobacteria;o__Pelagibacterales;f__Pelagibacteraceae;g__Pelagibacter;s__Pelagibacter ubique_Q		SAR11-I	69.83	69.53	69.2	73.8	72.77	71.31	71.97	71.52	73.02	73.5	73.68	73.45	72.83	75.71	75.71	75.9	75.89	75.5	75.84	75.88	76.18	77.61	77.43	76.69	76.9	77.64	76.65	75.83	76.65	78.38	79.96	79.91	80	79.79	80.14	79.79	100	95.34	80.77	91.17	89.98	89.83	76.96	76.75	77.23
38	HIMB083	d__Bacteria;p__Pseudomonadota;c__Alphaproteobacteria;o__Pelagibacterales;f__Pelagibacteraceae;g__Pelagibacter;s__Pelagibacter ubique_Q		SAR11-I	70.37	69.83	69.27	73.97	72.73	71.53	72.44	71.79	73.28	73.64	73.85	73.45	72.85	75.71	75.74	75.93	75.91	75.58	75.93	75.95	76.5	77.55	77.41	76.86	77.24	77.45	76.72	75.7	76.77	78.05	79.98	79.68	79.93	79.78	80.05	79.67	95.13	100	81.51	90.94	89.67	89.46	77.02	76.86	77.27
39	SCGC_AAA797-I19	d__Bacteria;p__Pseudomonadota;c__Alphaproteobacteria;o__Pelagibacterales;f__Pelagibacteraceae;g__Pelagibacter;s__Pelagibacter ubique_D		SAR11-I	70.27	69.47	69.36	73.84	72.58	71.35	72.34	71.98	72.97	73.6	73.75	73.54	72.69	75.77	75.79	75.74	75.75	75.5	75.91	75.75	76.44	77.14	76.66	76.73	77.1	77.1	76.3	75.07	76.39	77.43	79.24	78.98	79.48	79.05	78.92	79.22	80.61	81.52	100	81.46	81.31	81.12	77.15	76.78	77.24
40	SCGC_AAA795-O19	d__Bacteria;p__Pseudomonadota;c__Alphaproteobacteria;o__Pelagibacterales;f__Pelagibacteraceae;g__Pelagibacter;s__Pelagibacter ubique_P		SAR11-I	70.12	69.86	69.18	74.4	73.26	71.63	72.19	71.82	73.24	73.99	74.26	74.05	73.53	75.71	75.8	75.78	75.78	75.58	75.78	75.83	76.34	77.48	77.69	76.69	77.01	77.59	76.69	76.06	76.83	78.76	80.1	79.98	79.85	79.19	79.66	80.1	91.07	91.08	81.6	100	92.23	92.08	76.94	76.57	76.95
41	SCGC_AAA795-P11	d__Bacteria;p__Pseudomonadota;c__Alphaproteobacteria;o__Pelagibacterales;f__Pelagibacteraceae;g__Pelagibacter;s__Pelagibacter ubique_O		SAR11-I	70.55	69.63	69.67	73.94	72.98	71.87	72.62	72.23	73.17	73.84	74.12	73.84	73.55	76.05	75.9	76.06	76.12	75.8	76.09	76.08	76.83	77.64	77.8	76.87	77.49	78.31	77.23	76.25	77.15	78.27	80	79.86	79.95	79.83	80.12	80.04	89.95	89.86	81.53	92.27	100	90.62	77.28	76.93	77.25
42	SCGC_AAA795-J21	d__Bacteria;p__Pseudomonadota;c__Alphaproteobacteria;o__Pelagibacterales;f__Pelagibacteraceae;g__Pelagibacter;s__Pelagibacter ubique_A		SAR11-I	70.74	69.34	69.61	73.89	72.94	72.18	72.58	72.32	73.25	74.16	74.16	74.26	73.31	75.92	75.74	75.86	75.91	75.6	75.84	75.94	76.72	77.45	77.62	77.25	77.09	77.5	76.92	75.66	76.91	77.71	79.82	79.78	79.76	79.76	79.99	79.75	89.61	89.51	81.09	92.16	90.53	100	77.12	76.62	77.29
43	N-LaCa2-17jan24-061	d__Bacteria;p__Pseudomonadota;c__Alphaproteobacteria;o__Pelagibacterales;f__Pelagibacteraceae;g__Pelagibacter;s__		SAR11-I	70.86	69.72	69.5	74.16	73.06	72.04	72.45	71.87	73.35	73.47	73.65	73.22	72.95	75.94	75.93	76.26	76.2	76.06	76.3	76.2	76.65	76.76	76.65	77.58	77.52	76.21	76.11	75.29	76.21	76.29	77.45	77.37	77.77	77.55	77.3	76.37	76.95	77.1	77	76.79	77.02	77.03	100	88.83	90
44	cas-50m-174	d__Bacteria;p__Pseudomonadota;c__Alphaproteobacteria;o__Pelagibacterales;f__Pelagibacteraceae;g__Pelagibacter;s__Pelagibacter sp001438335		SAR11-I	70.81	69.73	69.63	73.8	72.43	71.94	71.99	71.82	73.23	72.97	73.31	72.78	72.5	75.87	75.91	76.15	76.19	76.11	76.18	76.12	76.04	75.7	76.55	77.74	77.73	75.55	75.72	75.44	75.95	75.46	77.35	77.19	77.73	77.28	77.08	76.4	76.43	76.51	76.65	76.54	76.72	76.45	88.42	100	96.69
45	BACL5_MAG-120820-bin39	d__Bacteria;p__Pseudomonadota;c__Alphaproteobacteria;o__Pelagibacterales;f__Pelagibacteraceae;g__Pelagibacter;s__Pelagibacter sp001438335		SAR11-I	70.87	69.73	69.49	74.11	72.51	71.98	72.63	72.03	73.58	73.32	73.5	73.1	72.73	76.36	76.23	76.52	76.53	76.46	76.59	76.53	76.65	76.99	76.81	77.83	77.5	76.41	76.23	75.84	76.45	76.46	77.93	77.71	77.91	77.92	77.79	76.74	77.21	77.3	77.21	77.04	77.14	77.36	89.82	96.93	100
46	cas-150m-16	d__Bacteria;p__Pseudomonadota;c__Alphaproteobacteria;o__Pelagibacterales;f__Pelagibacteraceae;g__Pelagibacter;s__		SAR11-I	70.82	69.49	69.44	74.09	72.54	71.21	72.16	71.51	73.31	72.86	73.06	72.66	72.22	76.27	76.03	76.22	76.3	75.95	76.2	76.21	75.92	76.26	76.36	76.96	77.13	75.9	75.81	75.42	76.13	76.48	78.09	77.95	77.98	78.1	78.07	76.38	76.86	77.03	76.57	77	77.22	77.26	78.25	78.14	78.36
47	Baikal-deep-G37	d__Bacteria;p__Pseudomonadota;c__Alphaproteobacteria;o__Pelagibacterales;f__Pelagibacteraceae;g__Pelagibacter;s__Pelagibacter sp009693705		SAR11-I	69.93	69.08	68.92	72.75	72.04	71.14	71.47	71.18	72.52	72.44	72.5	72.24	71.91	75.21	75.23	75.45	75.44	75.22	75.51	75.44	75.1	76	75.57	76.23	76.33	75.28	74.99	74.61	75.35	76.1	77.06	77.01	77.2	77.15	77.16	76.17	76.2	76.32	76.16	76.14	76.51	76.42	77.26	77.36	77.57
48	Baikal-G1	d__Bacteria;p__Pseudomonadota;c__Alphaproteobacteria;o__Pelagibacterales;f__Pelagibacteraceae;g__Pelagibacter;s__Pelagibacter sp009693705		SAR11-I	69.95	69.02	68.93	72.57	71.98	70.64	71.24	70.82	72.2	72.16	72.16	71.81	71.5	74.86	75.01	75.07	75.19	75.09	75.12	75.03	74.76	74.87	75.1	76.29	76.46	74.76	74.63	74.1	74.93	75.82	76.54	76.4	77.17	76.72	76.63	75.45	75.74	75.96	76.21	75.99	76.26	75.98	76.74	77.34	77.26
49	N-Mw9-20nov23-020	d__Bacteria;p__Pseudomonadota;c__Alphaproteobacteria;o__Pelagibacterales;f__Pelagibacteraceae;g__Pelagibacter;s__Pelagibacter sp016870175	Pelagibacter malawensis	SAR11-I	69.65	68.64	68.65	72.5	71.74	70.74	71.25	70.8	72.2	71.9	72.06	71.95	71.58	74.46	74.57	74.71	74.72	74.65	74.82	74.72	74.57	75.5	74.96	75.71	75.74	74.88	74.51	73.88	74.83	75.31	76.29	76.22	76.49	76.39	76.28	75.44	75.58	75.74	75.55	75.44	75.8	75.72	76.6	76.6	76.84
50	N-Mw8-13nov23-009	d__Bacteria;p__Pseudomonadota;c__Alphaproteobacteria;o__Pelagibacterales;f__Pelagibacteraceae;g__Pelagibacter;s__Pelagibacter sp016870175	Pelagibacter malawensis	SAR11-I	69.46	68.81	68.57	72.29	71.46	70.51	70.96	70.77	71.9	71.6	71.72	71.64	71.27	74.18	74.22	74.42	74.42	74.25	74.52	74.42	74.35	74.97	74.67	75.35	75.29	74.51	74.26	73.73	74.5	74.92	76.01	75.95	76.23	76.08	75.96	75.12	75.2	75.45	75.31	75.11	75.47	75.28	76.11	76.56	76.49
51	N-Mw5-13nov23-008	d__Bacteria;p__Pseudomonadota;c__Alphaproteobacteria;o__Pelagibacterales;f__Pelagibacteraceae;g__Pelagibacter;s__Pelagibacter sp016870175	Pelagibacter malawensis	SAR11-I	69.8	68.85	68.8	72.61	71.78	70.75	71.31	70.81	72.22	72.02	72.05	72.04	71.65	74.62	74.68	74.82	74.8	74.62	74.85	74.83	74.6	75.51	75.03	75.77	75.69	74.91	74.57	74.05	74.91	75.52	76.36	76.3	76.54	76.46	76.41	75.46	75.59	75.75	75.59	75.48	75.94	75.73	76.64	76.65	76.9
52	N-Mw14-23nov23-016	d__Bacteria;p__Pseudomonadota;c__Alphaproteobacteria;o__Pelagibacterales;f__Pelagibacteraceae;g__Pelagibacter;s__Pelagibacter sp016870175	Pelagibacter malawensis	SAR11-I	69.54	68.73	68.64	72.43	71.97	70.91	71.29	70.82	72.07	72.09	72.13	71.87	71.7	74.63	74.67	74.77	74.78	74.59	74.81	74.75	74.73	75.44	75.25	75.89	75.88	74.87	74.64	74.08	74.93	75.42	76.37	76.36	76.57	76.49	76.38	75.6	75.63	75.8	75.8	75.66	75.89	75.89	76.73	76.76	77.04
53	N-Mw10-20nov23-014	d__Bacteria;p__Pseudomonadota;c__Alphaproteobacteria;o__Pelagibacterales;f__Pelagibacteraceae;g__Pelagibacter;s__Pelagibacter sp016870175	Pelagibacter malawensis	SAR11-I	69.61	68.91	68.83	72.7	71.75	70.85	71.33	70.96	72.16	71.93	72.06	71.9	71.59	74.6	74.62	74.81	74.81	74.66	74.86	74.81	74.73	75.62	74.98	75.73	75.85	74.87	74.58	73.98	74.93	75.22	76.33	76.33	76.45	76.35	76.29	75.5	75.62	75.83	75.58	75.42	75.97	75.82	76.6	76.71	76.9
54	N-Mw13-23nov23-053	d__Bacteria;p__Pseudomonadota;c__Alphaproteobacteria;o__Pelagibacterales;f__Pelagibacteraceae;g__Pelagibacter;s__Pelagibacter sp016870175	Pelagibacter malawensis	SAR11-I	69.62	69.03	68.73	72.61	71.76	70.83	71.27	70.88	72.1	72.03	72	71.85	71.67	74.62	74.64	74.81	74.81	74.66	74.88	74.81	74.81	75.31	75.04	75.71	75.81	74.82	74.64	74.16	74.93	75.28	76.56	76.43	76.57	76.48	76.38	75.47	75.6	75.82	75.74	75.61	75.97	75.83	76.69	76.83	76.88
55	N-Mw1-16nov23-027	d__Bacteria;p__Pseudomonadota;c__Alphaproteobacteria;o__Pelagibacterales;f__Pelagibacteraceae;g__Pelagibacter;s__Pelagibacter sp016870175	Pelagibacter malawensis	SAR11-I	69.62	68.77	68.62	72.54	71.72	70.84	71.33	70.94	72.18	72.03	71.97	71.91	71.6	74.63	74.63	74.77	74.81	74.54	74.85	74.79	74.62	75.44	75.05	75.76	75.66	74.88	74.64	74.05	74.91	75.4	76.48	76.39	76.47	76.45	76.4	75.53	75.64	75.79	75.68	75.55	75.93	75.85	76.69	76.83	76.99
56	N-Mw6-13nov23-020	d__Bacteria;p__Pseudomonadota;c__Alphaproteobacteria;o__Pelagibacterales;f__Pelagibacteraceae;g__Pelagibacter;s__Pelagibacter sp016870175	Pelagibacter malawensis	SAR11-I	69.71	68.8	68.72	72.59	71.81	70.82	71.33	70.93	72.12	72.03	72.09	71.9	71.64	74.57	74.61	74.69	74.72	74.58	74.76	74.69	74.67	75.41	75.09	75.86	75.85	74.85	74.59	73.98	74.91	75.52	76.27	76.19	76.51	76.34	76.23	75.47	75.52	75.71	75.56	75.54	75.9	75.78	76.62	76.73	76.9
57	N-Mw2-16nov23-014	d__Bacteria;p__Pseudomonadota;c__Alphaproteobacteria;o__Pelagibacterales;f__Pelagibacteraceae;g__Pelagibacter;s__Pelagibacter sp016870175	Pelagibacter malawensis	SAR11-I	69.69	68.95	68.83	72.61	71.71	70.77	71.21	70.94	72.24	71.88	71.99	71.9	71.57	74.69	74.65	74.81	74.78	74.67	74.87	74.8	74.69	75.6	75.06	75.75	75.9	74.93	74.65	74.16	74.92	75.41	76.4	76.39	76.62	76.48	76.38	75.43	75.56	75.8	75.6	75.44	75.95	75.92	76.64	76.75	76.9
58	N-Mw7-13nov23-016	d__Bacteria;p__Pseudomonadota;c__Alphaproteobacteria;o__Pelagibacterales;f__Pelagibacteraceae;g__Pelagibacter;s__Pelagibacter sp016870175	Pelagibacter malawensis	SAR11-I	69.74	68.84	68.68	72.68	71.77	70.92	71.35	70.88	72.14	72.06	72.06	71.9	71.66	74.61	74.66	74.85	74.85	74.67	74.9	74.83	74.7	75.45	75.05	75.8	75.86	74.85	74.61	74.02	74.93	75.42	76.39	76.32	76.51	76.4	76.36	75.59	75.62	75.79	75.56	75.56	75.8	75.66	76.6	76.9	76.96
59	N-Mw15-23nov23-031	d__Bacteria;p__Pseudomonadota;c__Alphaproteobacteria;o__Pelagibacterales;f__Pelagibacteraceae;g__Pelagibacter;s__Pelagibacter sp016870175	Pelagibacter malawensis	SAR11-I	69.67	68.87	68.6	72.6	71.59	70.67	71.34	70.85	72.14	71.93	72.05	71.89	71.61	74.58	74.57	74.76	74.78	74.62	74.86	74.78	74.77	75.47	75.03	75.7	75.71	74.9	74.63	74.08	75	75.4	76.32	76.31	76.57	76.46	76.28	75.46	75.52	75.73	75.58	75.44	75.86	75.77	76.65	76.91	76.99
60	N-Mw11-20nov23-023	d__Bacteria;p__Pseudomonadota;c__Alphaproteobacteria;o__Pelagibacterales;f__Pelagibacteraceae;g__Pelagibacter;s__Pelagibacter sp016870175	Pelagibacter malawensis	SAR11-I	69.65	68.88	68.81	72.67	71.7	70.71	71.42	70.88	72.22	71.83	72	71.92	71.62	74.63	74.7	74.86	74.85	74.7	74.94	74.81	74.69	75.56	75	75.74	75.81	74.96	74.58	74	74.91	75.39	76.41	76.37	76.41	76.4	76.31	75.44	75.56	75.87	75.48	75.47	75.97	75.87	76.63	76.69	76.95
62	MED-G40	d__Bacteria;p__Pseudomonadota;c__Alphaproteobacteria;o__Pelagibacterales;f__Pelagibacteraceae;g__MED-G40;s__MED-G40 sp002457515		SAR11-II	69.46	69.76	68.72	69.91	68.43	67.77	68.97	68.43	68.62	68.27	68.39	68.68	68.3	68.57	68.51	68.47	68.53	68.05	68.51	68.5	68.7	68.72	69.11	68.57	68.24	68.76	68.42	67.27	68.82	70.46	68.69	68.68	68.58	68.56	68.46	68.28	68.16	68.55	68.74	68.28	68.75	69.02	68.85	69.5	68.77
63	N-LaRo1-16jan24-084	d__Bacteria;p__Pseudomonadota;c__Alphaproteobacteria;o__Pelagibacterales;f__Pelagibacteraceae;g__SYDM01;s__SYDM01 sp008638125		SAR11-II	69.29	69.19	67.96	69.66	67.75	67.79	67.98	67.92	68.33	68.23	68.11	68.35	67.85	68.16	68.34	68.33	68.37	68.08	68.48	68.32	68.63	68.43	68.69	68.15	68.05	68.3	68.08	67.38	68.14	68.95	68.31	68.26	68.72	68.31	68.38	68.15	68.26	68.59	68.59	67.79	68.64	68.54	68.86	75.41	68.57
64	N-Balt4-05jul22-028	d__Bacteria;p__Pseudomonadota;c__Alphaproteobacteria;o__Pelagibacterales;f__Pelagibacteraceae;g__SYDM01;s__SYDM01 sp008638125		SAR11-II	69.13	69.03	67.91	69.36	67.9	67.59	68.12	67.77	67.81	68.18	68.09	68.35	67.76	68.08	68.35	68.29	68.3	67.78	68.36	68.41	68.5	68.44	68.68	68.4	68.37	68.41	68.06	66.97	68.43	68.56	68.31	68.32	68.35	68.43	68.36	68.39	68.14	68.44	68.51	67.59	68.59	68.7	68.86	75.77	68.62
65	TrH-25oct19-165	d__Bacteria;p__Pseudomonadota;c__Alphaproteobacteria;o__Pelagibacterales;f__Pelagibacteraceae;g__SYDM01;s__SYDM01 sp005801485	Pelagilacustribacter hypolimneticus	SAR11-II	69	69.03	68.22	69.13	67.56	67.52	68.18	67.82	68.02	67.97	67.99	68.22	67.92	68.14	68.17	68.07	68.13	67.85	68.09	68.12	68.33	67.8	68.35	68.19	68.05	68.29	67.85	67.31	68.04	68.85	68.24	68.21	68.34	68.41	68.4	68.15	68.17	68.31	68.21	68.04	68.45	68.67	68.69	70.27	68.51
66	AH-24oct19-262	d__Bacteria;p__Pseudomonadota;c__Alphaproteobacteria;o__Pelagibacterales;f__Pelagibacteraceae;g__SYDM01;s__SYDM01 sp005801485	Pelagilacustribacter hypolimneticus	SAR11-II	69.2	69.11	68.51	69.03	67.86	67.92	68.24	68.1	68.02	68.38	68.32	68.45	68.15	68.38	68.51	68.53	68.53	68.17	68.57	68.55	68.46	67.97	68.62	68.49	68.14	68.25	68.02	67.26	68.33	68.75	68.46	68.4	68.43	68.41	68.52	68.45	68.29	68.48	68.59	68.26	68.41	68.64	68.89	70.26	68.62
67	cas-50m-154	d__Bacteria;p__Pseudomonadota;c__Alphaproteobacteria;o__Pelagibacterales;f__Pelagibacteraceae;g__SYDM01;s__SYDM01 sp005801485	Pelagilacustribacter hypolimneticus	SAR11-II	69.04	68.97	68.37	69.72	68.34	68.2	68.84	68.4	69.45	69.01	68.92	69.09	68.8	71.76	72.61	72.69	72.9	72.89	72.79	72.71	69.79	69.22	69.85	70.04	69.43	69.66	69.42	68.79	69.68	70.78	70.2	70.14	70.45	70.45	70.33	69.89	70.07	69.96	69.94	69.92	70.32	70.76	70.43	71.07	70.54
68	TrE-03may19-55	d__Bacteria;p__Pseudomonadota;c__Alphaproteobacteria;o__Pelagibacterales;f__Pelagibacteraceae;g__SYDM01;s__SYDM01 sp005801485	Pelagilacustribacter hypolimneticus	SAR11-II	68.91	68.72	68.09	68.64	67.62	67.37	67.59	67.56	67.73	68.19	67.88	67.93	67.56	67.92	68.05	68.12	68.1	67.83	68.25	68.17	68.29	67.77	68.51	68.18	67.89	68.04	67.7	66.77	67.83	69.19	68.16	68.14	68.21	68.2	68.35	68.01	68.01	68.02	67.85	68	67.88	68.34	68.51	70.06	68.46
69	PRT-SC02	d__Bacteria;p__Pseudomonadota;c__Alphaproteobacteria;o__Pelagibacterales;f__Pelagibacteraceae;g__PRT-SC02;s__PRT-SC02 sp001321855		SAR11-II	68.51	67.63	67.16	68.23	67.31	66.91	67.75	67.04	66.71	67.1	67.27	67.48	67.04	67.32	67.15	67.22	67.14	66.55	67.13	67.18	67.33	67.74	67.62	66.92	66.64	67.94	67.49	66.3	67.52	67.74	67.5	67.6	66.69	67.35	67.26	67.38	67.45	67.36	67.23	66.03	67.32	67.63	67.54	67.74	67.66
70	TMED165	d__Bacteria;p__Pseudomonadota;c__Alphaproteobacteria;o__Pelagibacterales;f__Pelagibacteraceae;g__TMED165;s__TMED165 sp002171035		SAR11-II	68.54	68.47	67.65	68.75	67.45	67.77	68.59	68.06	67.88	68.27	67.8	67.81	67.29	68.17	68.16	68.05	68.1	67.71	68.08	68.08	68.12	69.5	68.44	68.11	67.83	68.15	68.21	67.32	68.19	67.76	68.19	68.32	68.01	68.18	68.17	68.16	68.03	68.23	67.98	67.7	68.52	69.65	68.19	69.2	68.25
71	MED727	d__Bacteria;p__Pseudomonadota;c__Alphaproteobacteria;o__Pelagibacterales;f__Pelagibacteraceae;g__MED727;s__MED727 sp002689245		SAR11-II	69.24	69.3	68.2	68.97	68.35	67.52	68.4	68.1	68.33	68.72	68.1	68.33	67.8	68.13	68.27	68.32	68.43	68	68.3	68.35	68.32	68.35	68.63	68.38	68.19	68.03	67.98	67.28	67.78	69.03	68.23	68.18	67.62	68.01	68.22	67.97	68.08	68.19	68.17	67.79	68.38	68.45	68.68	68.79	68.28
72	TMED170	d__Bacteria;p__Pseudomonadota;c__Alphaproteobacteria;o__Pelagibacterales;f__Pelagibacteraceae;g__TMED170;s__TMED170 sp002170875		SAR11-II	69.29	69.69	68.33	69.81	68.66	68.33	69.23	68.23	68.16	68.36	68.24	68.68	67.85	68.54	68.41	68.53	68.61	68.04	68.6	68.56	68.5	67.87	68.31	68.81	68.86	68.23	68.19	67.27	68.39	68.07	68.53	68.51	68.82	68.34	68.33	68.11	67.99	68.42	68.56	68.24	68.27	68.94	68.72	70.15	68.73
73	SCGC_AAA795-E07	d__Bacteria;p__Pseudomonadota;c__Alphaproteobacteria;o__Pelagibacterales;f__Pelagibacteraceae;g__Pelagibacter_A;s__Pelagibacter_A ubique_A		SAR11-II	69.07	68.89	68.01	68.96	68.41	68.28	68.74	68.4	68.1	68.52	68.57	68.54	68.14	68.4	68.4	68.36	68.35	67.92	68.3	68.27	68.68	68.75	69	68.84	68.51	68.82	68.46	67.89	68.43	68.95	68.63	68.73	68.17	68.63	68.35	68.42	68.6	68.69	68.76	68.76	68.67	68.82	68.82	69.49	68.61
75	AG-313-A04	d__Bacteria;p__Pseudomonadota;c__Alphaproteobacteria;o__Pelagibacterales;f__Pelagibacteraceae;g__Pelagibacter_A;s__Pelagibacter_A sp003284275		SAR11-II	69.28	68.97	68.13	69.78	68.06	68.28	68.97	68.39	68.22	68.69	68.69	68.64	68.35	68.59	68.55	68.58	68.62	68.08	68.59	68.62	69.04	68.59	69.22	68.64	68.15	69.08	68.5	67.43	68.94	69.61	69	68.94	68.37	68.73	68.67	68.68	68.48	68.71	68.97	68.55	68.79	68.99	68.92	69.5	68.59
76	LSUCC0664	d__Bacteria;p__Pseudomonadota;c__Alphaproteobacteria;o__Pelagibacterales;f__Pelagibacteraceae;g__HIMB114;s__HIMB114 sp008638005		SAR11-IIIa	66.79	66.76	66.4	66.77	66.88	66.38	66.83	66.62	66.32	66.9	66.87	67.29	66.67	66.75	66.99	66.94	66.82	66.54	67	66.99	66.92	67.02	67	67.17	66.81	66.86	67.08	65.78	66.85	66.69	67.21	67.11	66.86	66.86	66.93	66.7	66.93	67.09	67.36	66.75	66.74	67.21	67.15	67.41	66.9
77	MED-G102	d__Bacteria;p__Pseudomonadota;c__Alphaproteobacteria;o__Pelagibacterales;f__Pelagibacteraceae;g__HIMB114;s__HIMB114 sp002684895		SAR11-IIIa	66.49	66.34	66.11	66.37	66.3	66.18	66.13	66.21	65.87	66.68	66.63	66.75	66.01	66.15	66	66.08	66.08	65.8	66.18	66.09	66.31	66.18	66.51	66.72	66.46	66.25	66.38	65.67	66.15	66.22	66.54	66.44	66.17	66.31	66.12	66.83	66.11	66.26	66.21	66.22	66.11	66.4	66.34	66.93	66.63
78	MED-G103	d__Bacteria;p__Pseudomonadota;c__Alphaproteobacteria;o__Pelagibacterales;f__Pelagibacteraceae;g__HIMB114;s__HIMB114 sp002171085		SAR11-IIIa	66.54	66.67	66.1	66.69	66.67	66.19	66.85	66.21	66.38	66.94	66.79	66.8	65.85	66.59	66.61	66.51	66.46	66.36	66.6	66.47	66.73	66.45	66.46	66.81	66.68	66.27	66.47	65.58	66.67	66.28	66.85	66.73	66.51	66.54	66.55	66.89	66.32	66.48	66.77	66.72	66.29	66.77	66.82	66.71	66.69
79	LSUCC0723	d__Bacteria;p__Pseudomonadota;c__Alphaproteobacteria;o__Pelagibacterales;f__Pelagibacteraceae;g__HIMB114;s__		SAR11-IIIa	66.79	66.9	66.33	66.65	67.08	66.66	67.13	66.78	66.68	66.88	67.05	67.31	66.7	66.95	67.06	67	66.95	66.58	66.91	66.94	67.12	67.17	67.15	67.39	67.43	66.8	67.08	65.76	67.18	66.74	67.19	67.12	66.79	66.9	67.03	67.26	66.9	67	67.24	66.75	66.97	67.54	67.18	67.65	67.25
80	HIMB114	d__Bacteria;p__Pseudomonadota;c__Alphaproteobacteria;o__Pelagibacterales;f__Pelagibacteraceae;g__HIMB114;s__HIMB114 sp000163555		SAR11-IIIa	67.05	66.81	66.34	67.06	66.97	66.71	67.22	66.7	66.65	67.21	67.23	67.42	66.46	66.93	67.2	67.06	67.07	66.59	67.03	67.11	67.21	66.95	67.2	67.21	67.02	67.1	67.06	66.08	67.05	66.89	67.34	67.3	66.87	67.13	66.98	67.49	66.98	67.07	67.34	66.75	66.86	67.54	67.27	67.28	67.02
83	LSUCC0261	d__Bacteria;p__Pseudomonadota;c__Alphaproteobacteria;o__Pelagibacterales;f__Pelagibacteraceae;g__IMCC9063;s__IMCC9063 sp008638015		SAR11-IIIa	67.15	66.99	66.53	66.98	66.8	66.53	66.89	66.62	66.63	67.04	66.96	67.16	66.63	67.01	67.04	67.08	67.08	66.85	67.27	67.24	67.24	66.91	67.43	67.38	66.95	66.86	67.05	65.78	67.15	66.8	67.37	67.31	66.93	67.14	67.02	67	66.87	67.09	67.3	66.64	67.1	67.66	67.34	67.65	67.36
84	N-LaCa2-17jan24-056	d__Bacteria;p__Pseudomonadota;c__Alphaproteobacteria;o__Pelagibacterales;f__Pelagibacteraceae;g__IMCC9063;s__IMCC9063 sp008638015		SAR11-IIIa	66.87	66.87	66.05	67.06	66.58	66.41	66.52	66.51	66.77	66.76	66.38	66.68	66.08	66.36	66.5	66.62	66.54	66.22	66.5	66.54	66.89	66.95	67.37	67	66.7	66.64	66.37	65.38	66.63	66.54	66.74	66.73	66.56	66.58	66.64	66.59	66.67	66.89	66.88	66.09	66.75	67.23	66.79	67.59	67.24
85	N-LaRo1-16jan24-055	d__Bacteria;p__Pseudomonadota;c__Alphaproteobacteria;o__Pelagibacterales;f__Pelagibacteraceae;g__IMCC9063;s__IMCC9063 sp008638015		SAR11-IIIa	66.99	66.97	66.48	67.32	66.43	66.14	67.26	66.4	66.53	66.98	66.85	66.81	66.59	66.68	66.8	66.98	66.96	66.76	67.21	67.13	67.02	66.48	67	67.35	66.63	66.64	66.66	65.99	66.76	66.84	67.24	67.07	67.02	66.83	66.72	66.75	66.63	66.9	67.09	66.99	66.76	67.31	67.65	67.87	67.29
86	N-CoE-06may23-C26	d__Bacteria;p__Pseudomonadota;c__Alphaproteobacteria;o__Pelagibacterales;f__Pelagibacteraceae;g__IMCC9063;s__IMCC9063 sp008638015		SAR11-IIIa	66.67	66.98	66.35	67.01	66.27	66.48	66.91	66.46	66.36	66.56	66.76	66.89	66.56	66.43	66.8	66.65	66.62	66.62	66.79	66.63	66.74	66.29	66.76	67.07	66.27	66.7	66.67	65.59	66.8	67.13	67.05	67.2	66.81	66.46	66.63	66.68	66.27	66.8	67.07	66.46	66.57	66.79	67.16	67.94	67.19
87	N-LaCa1-17jan24-C29	d__Bacteria;p__Pseudomonadota;c__Alphaproteobacteria;o__Pelagibacterales;f__Pelagibacteraceae;g__IMCC9063;s__		SAR11-IIIa	66.02	66.51	66.09	66.61	66.16	65.74	66.55	65.84	65.69	66.47	66.38	66.55	66.08	66.32	66.64	66.65	66.52	66.01	66.53	66.49	66.36	66.63	66.19	66.38	66.16	66.16	65.99	65.05	66.55	66.28	66.85	66.71	66.45	66.61	66.6	66.36	66.51	66.46	66.58	65.74	66.72	66.7	66.62	67.2	66.4
88	N-LaCa2-17jan24-C21	d__Bacteria;p__Pseudomonadota;c__Alphaproteobacteria;o__Pelagibacterales;f__Pelagibacteraceae;g__IMCC9063;s__		SAR11-IIIa	67.38	67.16	66.61	67.57	67.19	67.03	67.44	66.84	66.98	67.37	67.4	67.49	66.81	67.35	67.5	67.42	67.35	67.01	67.43	67.44	67.39	67.62	67.54	67.98	67.37	67.45	67.26	66.39	67.12	67.59	67.71	67.58	67.25	67.17	67.33	67.02	67.38	67.59	67.55	67.03	67.67	67.74	67.69	68.05	67.5
89	N-LaRo3-16jan24-067	d__Bacteria;p__Pseudomonadota;c__Alphaproteobacteria;o__Pelagibacterales;f__Pelagibacteraceae;g__IMCC9063;s__		SAR11-IIIa	67.07	66.98	66.14	67.18	66.34	66.04	66.46	66.28	66.61	66.57	66.62	66.7	66.35	66.55	66.65	66.74	66.71	66.39	66.64	66.67	66.75	66.51	66.93	66.77	66.54	66.65	66.44	65.66	66.38	66.24	66.94	66.87	66.42	66.78	66.57	66.86	66.3	66.74	66.58	66.32	66.42	66.54	67.21	67.75	67.17
90	N-LaRo1-16jan24-069	d__Bacteria;p__Pseudomonadota;c__Alphaproteobacteria;o__Pelagibacterales;f__Pelagibacteraceae;g__IMCC9063;s__		SAR11-IIIa	67.04	66.9	66.4	67.08	66.49	66.35	66.98	66.58	66.47	66.57	66.76	66.84	66.38	66.71	66.95	66.9	66.89	66.33	66.84	66.77	66.95	67.09	67.17	67.18	67.19	66.79	66.77	65.86	66.71	66.67	66.92	66.99	66.92	66.95	67.04	66.95	66.76	67.01	67.09	66.53	66.85	67.39	67.52	67.73	67.22
91	IMCC9063	d__Bacteria;p__Pseudomonadota;c__Alphaproteobacteria;o__Pelagibacterales;f__Pelagibacteraceae;g__IMCC9063;s__IMCC9063 sp000195085		SAR11-IIIa	66.44	66.37	65.83	66.62	67	66.6	66.8	66.38	66.1	66.6	66.67	66.74	66.69	66.87	67.16	66.93	67.04	66.08	66.91	67.01	66.67	66.73	66.56	66.63	66.28	66.57	66.54	65.42	66.88	66.47	67.06	67.1	66.44	66.99	66.56	67.06	66.57	66.69	66.96	66.18	66.63	67.09	66.76	66.83	66.49
92	3300027983-82	d__Bacteria;p__Pseudomonadota;c__Alphaproteobacteria;o__Pelagibacterales;f__Pelagibacteraceae;g__IMCC9063;s__		SAR11-IIIa	66	65.99	65.58	65.7	65.38	65.29	65.77	65.43	65.48	65.57	65.98	65.85	65.61	66.02	65.85	66.04	65.9	65.69	66.13	65.97	66.08	65.45	65.85	66.34	65.89	65.67	65.63	64.93	65.67	65.9	66.24	66.16	66.26	66.28	66.16	65.87	65.88	65.99	66.18	65.95	65.74	65.81	66.56	66.42	66.14
93	3300027976-91	d__Bacteria;p__Pseudomonadota;c__Alphaproteobacteria;o__Pelagibacterales;f__Pelagibacteraceae;g__IMCC9063;s__		SAR11-IIIa	66.17	66.21	65.63	66.1	65.66	65.51	66.16	65.66	65.86	65.78	65.87	66.12	65.63	66.26	66.25	66.24	66.18	65.98	66.39	66.28	66.05	65.5	66.03	66.29	66.04	65.92	65.98	65.11	65.96	65.9	66.16	66.16	66.13	66.16	66.09	66.23	65.72	66.03	66.21	65.78	65.85	66.58	66.61	67.02	66.53
94	N-Balt2-05jul22-002	d__Bacteria;p__Pseudomonadota;c__Alphaproteobacteria;o__Pelagibacterales;f__Pelagibacteraceae;g__IMCC9063;s__IMCC9063 sp008638225		SAR11-IIIa	66.83	66.82	66.13	66.49	66.37	66.3	66.66	66.37	66.19	66.53	66.46	66.58	66.28	66.56	66.7	66.71	66.66	66.26	66.8	66.69	66.67	66.59	66.75	66.85	66.43	66.57	66.58	65.61	66.75	66.59	66.81	66.91	66.25	66.59	66.57	66.65	66.46	66.69	66.9	66.19	66.79	67.11	66.88	67.22	66.48
95	N-Balt1-05jul22-035	d__Bacteria;p__Pseudomonadota;c__Alphaproteobacteria;o__Pelagibacterales;f__Pelagibacteraceae;g__IMCC9063;s__IMCC9063 sp008638225		SAR11-IIIa	66.9	66.77	66.19	66.55	66.41	66.28	66.66	66.29	66.23	66.61	66.68	66.7	66.45	66.78	66.77	66.83	66.78	66.22	66.76	66.74	66.64	66.56	66.81	67.07	66.69	66.83	66.52	65.43	67.01	66.95	66.96	66.99	66.58	66.75	66.68	66.61	66.75	67.04	66.75	66.45	66.98	67.16	67.21	67.7	66.88
96	N-LaRo3-16jan24-063	d__Bacteria;p__Pseudomonadota;c__Alphaproteobacteria;o__Pelagibacterales;f__Pelagibacteraceae;g__IMCC9063;s__IMCC9063 sp008638225		SAR11-IIIa	66.74	66.83	66.32	66.52	65.93	65.83	66.39	66.28	66.25	66.36	66.43	66.67	66.18	66.53	66.78	66.64	66.63	66.27	66.6	66.61	66.49	65.99	66.8	66.68	66.68	66.53	66.32	65.55	66.61	66.5	66.81	66.64	66.45	66.62	66.65	66.34	66.45	66.69	66.71	66.3	66.54	67.16	67	67.46	66.94
97	N-LaCa1-17jan24-038	d__Bacteria;p__Pseudomonadota;c__Alphaproteobacteria;o__Pelagibacterales;f__Pelagibacteraceae;g__IMCC9063;s__IMCC9063 sp008638225		SAR11-IIIa	66.68	66.87	66.09	66.68	65.84	66.07	66.48	66.19	66.23	66.57	66.59	66.58	66.24	66.67	66.74	66.86	66.87	66.59	66.83	66.81	66.66	66.08	66.81	67.01	66.51	66.66	66.38	65.75	66.49	66.54	66.93	66.82	66.66	66.67	66.63	66.51	66.56	66.68	66.67	66.93	66.58	66.98	67.25	67.54	66.93
98	N-LaCa2-17jan24-036	d__Bacteria;p__Pseudomonadota;c__Alphaproteobacteria;o__Pelagibacterales;f__Pelagibacteraceae;g__IMCC9063;s__IMCC9063 sp008638225		SAR11-IIIa	66.58	66.73	66.19	66.33	66.05	65.76	66.24	66.14	65.89	66.14	66.31	66.24	65.94	66.28	66.32	66.4	66.37	66.08	66.39	66.44	66.44	66.2	66.55	66.86	66.66	66.26	66.25	65.16	66.56	66.66	66.67	66.68	66.46	66.44	66.3	66.44	66.26	66.59	66.62	66.17	66.45	66.72	66.95	67.22	66.81
99	cas-150m-34	d__Bacteria;p__Pseudomonadota;c__Alphaproteobacteria;o__Pelagibacterales;f__Pelagibacteraceae;g__IMCC9063;s__IMCC9063 sp008638225		SAR11-IIIa	66.71	66.95	66.01	66.54	66.24	65.92	66.67	66.08	66.52	66.33	66.25	66.33	66.04	66.55	66.85	66.87	66.67	66.52	66.82	66.85	66.52	66.51	66.63	66.94	66.82	66.61	66.38	65.54	66.54	66.63	66.76	66.59	66.59	66.63	66.72	66.45	66.38	66.61	66.87	66.37	66.84	66.58	66.94	67.03	66.65
100	N-LaRo2-16jan24-084	d__Bacteria;p__Pseudomonadota;c__Alphaproteobacteria;o__Pelagibacterales;f__Pelagibacteraceae;g__IMCC9063;s__IMCC9063 sp008638225		SAR11-IIIa	66.77	66.72	66.12	66.65	66.17	65.79	66.42	66.04	66.15	66.36	66.39	66.36	66.04	66.32	66.5	66.59	66.61	66.31	66.58	66.56	66.47	66.22	66.47	66.91	66.74	66.42	66.36	65.22	66.47	66.62	66.55	66.37	66.4	66.47	66.43	66.08	66.39	66.6	66.53	66.15	66.52	66.88	67.15	67.65	66.71
101	N-LaRo1-16jan24-C95	d__Bacteria;p__Pseudomonadota;c__Alphaproteobacteria;o__Pelagibacterales;f__Pelagibacteraceae;g__IMCC9063;s__IMCC9063 sp008638225		SAR11-IIIa	66.73	66.96	66.21	66.87	66.43	66.43	67	66.27	66.31	66.67	66.79	66.45	66.65	66.8	66.69	67	66.91	66.42	66.82	66.99	66.67	66.54	66.56	66.62	66.21	66.75	66.68	65.25	66.83	66.83	66.85	66.71	66.64	66.81	66.75	66.47	66.74	67.1	67.12	66.57	67.03	67.18	67.06	67.48	66.87
102	N-Mw11-20nov23-095	d__Bacteria;p__Pseudomonadota;c__Alphaproteobacteria;o__Pelagibacterales;f__Pelagibacteraceae;g__Fonsibacter;s__Fonsibacter sp016882225	A. africanus	SAR11-IIIb.1	66.62	66.87	66.18	66.65	66.25	66.17	66.5	66.04	66.44	66	66.25	66.38	65.96	66.41	66.2	66.23	66.29	65.99	66.29	66.24	66.42	65.79	66.75	66.74	66.65	66.29	66.12	65.45	66.24	66	66.26	66.24	66.49	66.55	66.55	66.54	66.39	66.57	66.52	66.53	66.6	66.32	66.88	67.14	66.62
103	N-Mw14-23nov23-072	d__Bacteria;p__Pseudomonadota;c__Alphaproteobacteria;o__Pelagibacterales;f__Pelagibacteraceae;g__Fonsibacter;s__Fonsibacter sp016882225	A. africanus	SAR11-IIIb.1	66.47	66.41	65.91	66.49	65.98	65.92	66.38	65.79	66.14	65.83	66.09	66.2	65.62	65.96	66.03	66.08	66.02	65.67	66.08	66.07	66.18	65.59	66.09	66.14	65.98	66.29	65.93	65.05	65.98	65.84	66.14	66.18	65.89	66.06	66.03	65.83	66.23	66.33	66.45	66.18	66.16	66.51	66.39	66.74	66.43
104	N-Mw6-13nov23-081	d__Bacteria;p__Pseudomonadota;c__Alphaproteobacteria;o__Pelagibacterales;f__Pelagibacteraceae;g__Fonsibacter;s__Fonsibacter sp016882225	A. africanus	SAR11-IIIb.1	66.41	66.41	65.91	66.21	66	66.08	66.54	65.93	66.04	65.88	66.16	66.29	65.71	65.85	65.99	65.97	65.92	65.49	65.98	65.95	66.07	65.39	66.15	66.13	65.98	66.06	65.95	65.12	66.01	65.78	66.07	65.94	65.87	66.04	66.13	66.13	66.09	66.27	66.25	65.88	66.01	66.4	66.32	66.65	66.15
105	N-Mw8-13nov23-087	d__Bacteria;p__Pseudomonadota;c__Alphaproteobacteria;o__Pelagibacterales;f__Pelagibacteraceae;g__Fonsibacter;s__Fonsibacter sp016882225	A. africanus	SAR11-IIIb.1	66.33	66.51	66	66.35	66.08	66.11	66.54	66.07	66.12	66.09	66.25	66.38	65.63	66.29	66.23	66.2	66.1	65.71	66.22	66.21	66.36	65.82	66.39	66.16	65.9	66.36	66.15	65.15	66.14	65.86	66.32	66.3	65.59	66.22	66.14	66.17	66.27	66.36	66.23	65.8	66.25	66.74	66.33	66.55	66.08
106	N-Mw10-20nov23-021	d__Bacteria;p__Pseudomonadota;c__Alphaproteobacteria;o__Pelagibacterales;f__Pelagibacteraceae;g__Fonsibacter;s__Fonsibacter sp016882225	A. africanus	SAR11-IIIb.1	66.46	66.88	65.98	66.63	65.87	65.99	66.45	65.89	66.24	65.88	66.32	66.39	65.67	66.04	66.11	66.21	66.1	65.66	66.19	66.15	66.15	65.4	66.24	66.08	65.94	66.17	66.11	65.31	65.98	65.7	66.23	66.21	65.96	66.06	66.24	65.94	66.24	66.3	66.22	65.82	66.1	66.67	66.33	66.79	66.19
107	N-Mw7-13nov23-070	d__Bacteria;p__Pseudomonadota;c__Alphaproteobacteria;o__Pelagibacterales;f__Pelagibacteraceae;g__Fonsibacter;s__Fonsibacter sp016882225	A. africanus	SAR11-IIIb.1	66.39	66.54	65.86	66.19	66.03	66.27	66.58	66.03	66	65.99	66.18	66.3	65.7	66.07	66.25	66.21	66.16	65.74	66.22	66.17	66.26	65.58	66	66.24	66.01	66.15	66.01	65.22	66.28	65.97	66.25	66.24	65.79	66.27	66.22	66.05	66.15	66.37	66.36	66.01	66.22	66.76	66.2	66.71	66.15
108	M_DeepCast_200m_m2_041	d__Bacteria;p__Pseudomonadota;c__Alphaproteobacteria;o__Pelagibacterales;f__Pelagibacteraceae;g__Fonsibacter;s__Fonsibacter sp016882225	A. africanus	SAR11-IIIb.1	66.55	66.78	65.99	66.26	66.34	66.08	66.19	66.07	66.37	66.09	66.11	66.09	65.71	66.15	66.15	66.16	66.15	65.65	66.23	66.15	66.14	65.4	66.35	66.46	66.14	65.99	65.9	65.16	66.01	66.44	66.19	66.02	65.83	66.31	66.2	66.17	66.46	66.4	66.69	66.5	66.07	66.68	66.6	66.84	66.39
109	N-Mw2-16nov23-072	d__Bacteria;p__Pseudomonadota;c__Alphaproteobacteria;o__Pelagibacterales;f__Pelagibacteraceae;g__Fonsibacter;s__Fonsibacter sp016882225	A. africanus	SAR11-IIIb.1	66.36	66.54	65.84	66.39	65.99	65.86	66.37	65.8	66.02	65.81	66.16	66.42	65.52	65.81	66.24	66.28	66.11	65.57	66.13	66.2	66.35	65.19	66.02	66.08	65.85	66.13	65.8	65.39	65.9	65.52	66.25	66.25	66.22	66.18	66.49	66.19	66.37	66.54	66.48	65.67	66.17	66.88	66.33	67.04	66.22
110	N-Mw5-13nov23-049	d__Bacteria;p__Pseudomonadota;c__Alphaproteobacteria;o__Pelagibacterales;f__Pelagibacteraceae;g__Fonsibacter;s__Fonsibacter sp016882225	A. africanus	SAR11-IIIb.1	66.37	66.31	66.15	66.43	66.05	65.99	66.56	65.87	66.11	66	66.11	66.19	65.7	65.93	66.04	66.01	65.94	65.56	65.98	66.04	66.11	65.65	66.39	66.28	66.05	66.07	65.96	65.3	66.01	66.14	66.01	66.06	65.97	65.92	65.98	65.86	65.98	66.14	66.35	65.98	65.91	66.56	66.22	66.72	66.14
111	N-Mw13-23nov23-097	d__Bacteria;p__Pseudomonadota;c__Alphaproteobacteria;o__Pelagibacterales;f__Pelagibacteraceae;g__Fonsibacter;s__Fonsibacter sp016882225	A. africanus	SAR11-IIIb.1	66.18	66.47	65.96	65.93	66.29	66.01	66.25	65.79	66.01	65.92	66.32	66.22	65.65	65.92	65.93	65.92	65.84	65.6	65.99	65.89	66.1	65.37	66.04	65.96	66.08	65.96	65.95	65.53	65.91	65.86	66.19	66.16	66	66.05	66.32	65.87	65.94	66.11	66.32	65.97	65.93	66.29	66.11	66.41	65.86
112	Umea3_bin-0378	d__Bacteria;p__Pseudomonadota;c__Alphaproteobacteria;o__Pelagibacterales;f__Pelagibacteraceae;g__Fonsibacter;s__Fonsibacter sp903869725	A. scandinavicus	SAR11-IIIb.2	66.58	66.74	66.16	66.98	66.18	66.02	66.4	66.08	66.26	66.29	66.37	66.4	65.85	66.53	66.59	66.8	66.84	66.28	66.82	66.87	66.58	66.41	66.76	66.76	66.65	66.77	66.34	65.38	66.51	66.63	66.74	66.56	66.45	66.75	66.71	66.13	66.59	66.72	66.71	66.46	66.74	67.03	66.88	67.07	66.75
113	VK1_bin-1242	d__Bacteria;p__Pseudomonadota;c__Alphaproteobacteria;o__Pelagibacterales;f__Pelagibacteraceae;g__Fonsibacter;s__Fonsibacter sp903869725	A. scandinavicus	SAR11-IIIb.2	66.87	67.1	66.45	66.95	66.81	66.35	66.78	66.39	66.52	66.56	66.66	66.65	66.51	67.07	67.04	67.07	67.05	66.49	67.01	67.09	66.99	66.7	67.13	66.71	66.74	67.08	66.5	65.63	66.7	66.78	66.96	66.83	66.58	66.75	66.89	66.46	67.1	66.95	66.96	66.81	67.06	67.27	67.1	67.54	66.96
114	Umea2p2_bin-1150	d__Bacteria;p__Pseudomonadota;c__Alphaproteobacteria;o__Pelagibacterales;f__Pelagibacteraceae;g__Fonsibacter;s__Fonsibacter sp903869725	A. scandinavicus	SAR11-IIIb.2	67.07	66.91	66.31	67.37	66.51	66.29	66.71	66.25	66.59	66.42	66.6	66.64	66.17	66.99	66.9	67.03	67.06	66.54	67.09	67.09	66.92	66.68	67.05	66.88	66.74	66.89	66.67	65.51	66.66	66.77	66.86	66.9	66.81	66.85	66.84	66.55	66.87	66.95	66.59	66.9	66.86	67.3	67.2	67.61	66.97
115	Umea_bin-06116	d__Bacteria;p__Pseudomonadota;c__Alphaproteobacteria;o__Pelagibacterales;f__Pelagibacteraceae;g__Fonsibacter;s__Fonsibacter sp903869725	A. scandinavicus	SAR11-IIIb.2	66.51	66.78	66.02	66.8	66.21	65.85	65.97	65.88	66.28	66.07	66.26	66.21	65.86	66.55	66.39	66.53	66.63	66.37	66.57	66.65	66.59	66.24	66.81	66.62	66.51	66.66	66.23	65.48	66.06	66.57	66.52	66.32	66.37	66.4	66.33	65.92	66.47	66.55	66.11	66.63	66.51	66.69	66.88	67.18	66.74
116	Umea2p1_bin-0712	d__Bacteria;p__Pseudomonadota;c__Alphaproteobacteria;o__Pelagibacterales;f__Pelagibacteraceae;g__Fonsibacter;s__Fonsibacter sp903869725	A. scandinavicus	SAR11-IIIb.2	66.86	67.04	66.23	66.9	66.39	66.27	66.58	66.27	66.59	66.6	66.58	66.5	66.12	66.79	66.56	66.7	66.74	66.28	66.67	66.74	66.8	66.36	67.03	66.84	66.62	66.8	66.61	65.51	66.57	66.74	66.83	66.77	66.59	66.75	66.72	66.37	66.74	66.82	66.73	66.76	66.82	67.19	67.15	67.25	66.92
117	Umea2_bin-2667	d__Bacteria;p__Pseudomonadota;c__Alphaproteobacteria;o__Pelagibacterales;f__Pelagibacteraceae;g__Fonsibacter;s__Fonsibacter sp903869725	A. scandinavicus	SAR11-IIIb.2	66.93	67.12	66.42	67.03	66.4	66.51	67.06	66.34	66.52	66.59	66.7	66.63	66.34	66.84	66.66	66.8	66.82	66.37	66.75	66.83	66.88	66.54	67.01	66.81	66.74	66.9	66.63	65.84	66.67	66.9	66.81	66.8	66.3	66.76	66.67	66.48	66.84	66.94	66.62	66.88	66.83	67.31	67.12	67.29	67.18
118	KR_bin-3261	d__Bacteria;p__Pseudomonadota;c__Alphaproteobacteria;o__Pelagibacterales;f__Pelagibacteraceae;g__Fonsibacter;s__Fonsibacter sp903869725	A. scandinavicus	SAR11-IIIb.2	66.49	66.8	66.03	66.78	66.36	66.19	66.34	66.1	66.36	66.33	66.56	66.55	66.06	66.52	66.49	66.51	66.6	66.19	66.56	66.61	66.63	66.46	66.8	66.73	66.77	66.82	66.42	65.35	66.23	66.68	66.57	66.43	66.43	66.53	66.51	66.16	66.65	66.57	66.52	66.68	66.66	66.94	66.85	67.17	66.7
119	YR_bin-3962	d__Bacteria;p__Pseudomonadota;c__Alphaproteobacteria;o__Pelagibacterales;f__Pelagibacteraceae;g__Fonsibacter;s__Fonsibacter sp903869725	A. scandinavicus	SAR11-IIIb.2	66.95	66.99	66.3	67.11	66.61	66.17	66.65	66.21	66.76	66.36	66.53	66.61	66.08	66.66	66.51	66.72	66.74	66.29	66.72	66.7	66.77	66.74	67.02	66.76	66.62	66.69	66.48	65.93	66.45	67.11	66.77	66.72	66.46	66.47	66.54	66.29	66.76	66.69	66.66	66.77	66.67	66.84	67.24	67.34	66.82
120	KR2_bin-1077	d__Bacteria;p__Pseudomonadota;c__Alphaproteobacteria;o__Pelagibacterales;f__Pelagibacteraceae;g__Fonsibacter;s__Fonsibacter sp903869725	A. scandinavicus	SAR11-IIIb.2	67.04	67.05	66.2	66.81	66.37	65.87	66.28	66.18	66.45	66.28	66.42	66.39	66.05	66.49	66.54	66.63	66.65	66.38	66.68	66.6	66.59	66.47	66.77	66.92	66.75	66.65	66.36	65.64	66.48	66.92	66.77	66.58	66.51	66.39	66.56	66.05	66.59	66.66	66.34	66.69	66.45	66.88	67.12	67.23	66.8
121	VK_bin-1211	d__Bacteria;p__Pseudomonadota;c__Alphaproteobacteria;o__Pelagibacterales;f__Pelagibacteraceae;g__Fonsibacter;s__Fonsibacter sp903869725	A. scandinavicus	SAR11-IIIb.2	66.68	66.92	66.13	66.76	66.14	65.96	66.33	66	66.32	66.22	66.38	66.28	65.99	66.53	66.47	66.68	66.65	66.35	66.58	66.66	66.76	66.21	66.72	66.82	66.81	66.67	66.18	65.5	66.46	66.34	66.61	66.55	66.53	66.43	66.46	66.17	66.6	66.69	66.39	66.9	66.54	66.86	66.96	67.38	66.96
122	KR1_bin-0258	d__Bacteria;p__Pseudomonadota;c__Alphaproteobacteria;o__Pelagibacterales;f__Pelagibacteraceae;g__Fonsibacter;s__Fonsibacter sp903869725	A. scandinavicus	SAR11-IIIb.2	66.66	66.86	66.22	66.93	66.12	65.69	66.26	66.07	66.38	66.2	66.46	66.5	66.17	66.59	66.43	66.7	66.64	66.31	66.63	66.7	66.49	66.05	66.94	66.62	66.54	66.51	66.2	65.34	66.13	66.88	66.72	66.58	66.51	66.47	66.5	66.04	66.54	66.53	66.43	66.86	66.51	66.66	67	67.15	66.86
123	AM_bin-3698	d__Bacteria;p__Pseudomonadota;c__Alphaproteobacteria;o__Pelagibacterales;f__Pelagibacteraceae;g__Fonsibacter;s__Fonsibacter sp903869725	A. scandinavicus	SAR11-IIIb.2	66.78	66.9	66.12	66.56	66.3	66.19	66.65	66.23	66.44	66.52	66.54	66.35	65.92	66.61	66.5	66.64	66.62	66.09	66.68	66.68	66.7	66.64	66.85	66.72	66.49	66.71	66.36	65.47	66.41	66.64	66.68	66.61	66.34	66.6	66.58	66.24	66.58	66.66	66.44	66.68	66.78	67.06	66.82	67.02	66.7
124	AM1_bin-0028	d__Bacteria;p__Pseudomonadota;c__Alphaproteobacteria;o__Pelagibacterales;f__Pelagibacteraceae;g__Fonsibacter;s__Fonsibacter sp903869725	A. scandinavicus	SAR11-IIIb.2	66.72	66.91	66.22	66.68	66.58	66.26	66.69	66.24	66.47	66.5	66.54	66.44	66.15	66.73	66.64	66.75	66.73	66.2	66.73	66.8	66.88	66.61	66.89	66.63	66.4	66.97	66.53	65.36	66.4	66.59	66.78	66.69	66.47	66.67	66.74	66.5	66.96	66.9	66.64	66.86	67.02	67.41	66.94	67.21	66.77
125	VK2_bin-0761	d__Bacteria;p__Pseudomonadota;c__Alphaproteobacteria;o__Pelagibacterales;f__Pelagibacteraceae;g__Fonsibacter;s__Fonsibacter sp903869725	A. scandinavicus	SAR11-IIIb.2	67.09	67.07	66.5	67.06	66.36	66.24	66.52	66.29	66.69	66.62	66.67	66.7	66.2	66.68	66.58	66.78	66.74	66.41	66.66	66.68	66.84	66.66	67.28	66.81	66.72	66.83	66.53	65.8	66.59	67.04	66.93	66.82	66.58	66.65	66.72	66.43	66.8	66.87	66.69	66.91	66.84	67.25	67.02	67.41	66.97
126	Ki2-D2_bin-0859	d__Bacteria;p__Pseudomonadota;c__Alphaproteobacteria;o__Pelagibacterales;f__Pelagibacteraceae;g__Fonsibacter;s__Fonsibacter sp903869725	A. scandinavicus	SAR11-IIIb.2	67.8	67.56	67.25	67.32	67.31	66.74	67.53	67	67.16	66.67	67.18	67.09	66.9	67.15	67.38	67.34	67.45	67.27	67.39	67.58	67.66	66.88	67.62	67.34	67.43	67.58	66.97	66.39	66.93	67.51	67.3	67.26	67.05	67.17	67.49	66.8	67.52	67.35	67.16	67.99	67.46	67.61	67.86	68.2	67.64
127	Umea3p1_bin-0107	d__Bacteria;p__Pseudomonadota;c__Alphaproteobacteria;o__Pelagibacterales;f__Pelagibacteraceae;g__Fonsibacter;s__Fonsibacter sp903869725	A. scandinavicus	SAR11-IIIb.2	66.7	66.96	66.19	66.82	66.2	66.26	66.6	66.22	66.38	66.34	66.4	66.5	65.87	66.6	66.62	66.84	66.74	66.38	66.76	66.8	66.6	66.45	67.16	66.74	66.68	66.65	66.51	65.59	66.71	66.79	66.61	66.55	66.19	66.7	66.34	66.3	66.51	66.63	66.56	66.62	66.67	66.77	66.92	67.2	66.91
128	Umea3p2_bin-0135	d__Bacteria;p__Pseudomonadota;c__Alphaproteobacteria;o__Pelagibacterales;f__Pelagibacteraceae;g__Fonsibacter;s__Fonsibacter sp903869725	A. scandinavicus	SAR11-IIIb.2	67.71	67.6	67.17	67.8	67.16	66.71	67.02	66.92	67.31	67.06	67.25	67.23	66.68	67.41	67.47	67.46	67.52	67.01	67.48	67.52	67.56	67.08	67.7	67.54	67.44	67.59	67.26	66.36	67.34	68.02	67.52	67.43	67.2	67.41	67.38	67.13	67.56	67.45	67.11	68.09	67.33	67.61	68.04	67.86	67.63
129	Kiruna_bin-10871	d__Bacteria;p__Pseudomonadota;c__Alphaproteobacteria;o__Pelagibacterales;f__Pelagibacteraceae;g__Fonsibacter;s__Fonsibacter sp903869725	A. scandinavicus	SAR11-IIIb.2	66.91	67.08	66.35	66.75	66.55	66.08	66.42	66.31	66.66	66.06	66.42	66.5	66.07	66.72	66.71	66.7	66.69	66.4	66.6	66.67	66.79	66.15	66.89	66.66	66.62	66.79	66.41	65.74	66.4	66.91	66.73	66.7	66.69	66.77	66.73	66.25	66.89	66.83	66.63	67.02	67.07	67.15	67.42	67.58	67.01
130	Umea3p4_bin-0316	d__Bacteria;p__Pseudomonadota;c__Alphaproteobacteria;o__Pelagibacterales;f__Pelagibacteraceae;g__Fonsibacter;s__Fonsibacter sp903869725	A. scandinavicus	SAR11-IIIb.2	67.3	67.24	66.64	66.87	66.71	66.32	66.68	66.57	66.83	66.78	66.63	66.69	66.22	66.96	66.81	66.94	66.91	66.62	66.87	66.84	67.14	66.82	67.18	67.3	67	67.01	66.73	66.01	66.59	67.45	67.03	66.92	66.59	66.92	66.9	66.5	67.06	67.03	66.71	67.29	67.22	67.42	67.34	67.7	67.04
131	Umea3p3-bin-1192	d__Bacteria;p__Pseudomonadota;c__Alphaproteobacteria;o__Pelagibacterales;f__Pelagibacteraceae;g__Fonsibacter;s__Fonsibacter sp903869725	A. scandinavicus	SAR11-IIIb.2	67.96	67.88	67.27	67.68	67.13	66.89	67.54	67.06	67.46	67.18	67.55	67.44	66.94	67.66	67.42	67.49	67.63	67.36	67.65	67.61	67.67	67.11	68.03	67.93	67.71	67.55	67.38	66.68	67.47	68.14	67.65	67.54	67.45	67.59	67.64	66.84	67.56	67.39	67.36	68.43	67.42	67.91	68.16	68.39	67.75
132	YR2_bin-0491	d__Bacteria;p__Pseudomonadota;c__Alphaproteobacteria;o__Pelagibacterales;f__Pelagibacteraceae;g__Fonsibacter;s__Fonsibacter sp903869725	A. scandinavicus	SAR11-IIIb.2	68.05	67.97	67.47	67.92	68.01	67.39	67.52	67.35	67.62	67.51	67.71	67.83	67.21	68.11	67.99	68.14	68.24	67.68	68.22	68.09	67.99	67.68	68.3	68.27	67.88	68.34	67.74	66.77	67.81	68.05	68.13	68.09	67.39	67.97	68	67.54	68.28	68.14	67.74	68.32	68.13	67.94	68.62	68.62	68.26
133	Ki2-D1-bin-0906	d__Bacteria;p__Pseudomonadota;c__Alphaproteobacteria;o__Pelagibacterales;f__Pelagibacteraceae;g__Fonsibacter;s__Fonsibacter sp903869725	A. scandinavicus	SAR11-IIIb.2	67.61	67.54	67.25	67.3	66.75	66.65	67.14	67.03	66.99	67.47	67.13	67.4	66.68	67.44	67.42	67.74	67.71	67.5	67.64	67.65	67.67	67.03	68	68.24	67.61	67.75	67.35	66.77	67.32	68.13	67.78	67.6	67.29	67.6	67.43	66.82	67.69	67.7	67.33	68.89	67.63	67.98	68.45	68.29	68.02
134	AM2-bin-0866	d__Bacteria;p__Pseudomonadota;c__Alphaproteobacteria;o__Pelagibacterales;f__Pelagibacteraceae;g__Fonsibacter;s__Fonsibacter sp903869725	A. scandinavicus	SAR11-IIIb.2	67.71	67.71	67.15	67.89	66.89	66.84	67.28	67.12	67.34	67.28	67.43	67.19	66.55	67.6	67.65	67.63	67.67	67.37	67.64	67.67	67.78	66.74	67.64	67.94	67.62	67.35	67.34	66.64	67.37	67.95	67.75	67.63	67.47	67.46	67.52	66.95	67.57	67.64	67.11	68.76	67.43	67.69	68.22	68.43	67.69
135	SCGC_AAA280-B11	d__Bacteria;p__Pseudomonadota;c__Alphaproteobacteria;o__Pelagibacterales;f__Pelagibacteraceae;g__Fonsibacter;s__Fonsibacter sp000371745	unnamed group	SAR11-IIIb.3	66.44	66.84	66.15	66.63	66.63	66.18	66.86	66.56	66.49	66.47	66.65	66.77	66.47	66.67	66.53	66.78	66.73	66.38	66.67	66.74	66.96	66.31	66.99	67	66.62	66.87	66.17	65.66	66.4	67.12	66.81	66.91	66.78	66.87	66.86	66.2	67.03	66.85	67.07	66.43	67.17	67.11	66.78	67.43	66.87
136	3300027749-48	d__Bacteria;p__Pseudomonadota;c__Alphaproteobacteria;o__Pelagibacterales;f__Pelagibacteraceae;g__Fonsibacter;s__Fonsibacter sp000371745	unnamed group	SAR11-IIIb.3	66.72	66.96	66.04	67.06	65.92	66.08	66.59	65.96	66.29	66.29	66.33	66.25	66.06	66.37	66.56	66.39	66.48	66.37	66.41	66.44	66.5	66.2	66.43	66.65	66.35	66.49	66.19	65.53	66.25	66.49	66.72	66.58	66.31	66.55	66.31	66.01	66.48	66.53	66.47	66.69	66.16	66.77	66.68	67.07	66.64
137	Umea1p2-bin-1062	d__Bacteria;p__Pseudomonadota;c__Alphaproteobacteria;o__Pelagibacterales;f__Pelagibacteraceae;g__Fonsibacter;s__	A. borealis	SAR11-IIIb.4	67.22	67.39	66.63	67.28	66.58	66.25	66.9	66.52	66.92	66.71	66.8	66.94	66.24	66.92	66.92	66.81	66.79	66.5	66.83	66.78	67.06	66.11	67.07	67.41	67.01	66.74	66.56	65.98	66.57	67.09	67.03	66.94	66.73	66.91	66.95	66.61	66.81	66.91	66.73	67.36	66.7	67.42	67.2	67.66	67.17
138	Umea1p1-bin-338	d__Bacteria;p__Pseudomonadota;c__Alphaproteobacteria;o__Pelagibacterales;f__Pelagibacteraceae;g__Fonsibacter;s__	A. borealis	SAR11-IIIb.4	66.81	66.97	66.3	66.96	66.11	65.99	66.54	66.08	66.49	66.26	66.55	66.53	66.02	66.63	66.69	66.66	66.64	66.32	66.68	66.65	66.76	66.32	66.7	67.11	66.71	66.28	66.24	65.58	66.6	67.03	66.86	66.74	66.77	66.65	66.74	66.26	66.71	66.78	66.71	66.72	66.66	67.45	67.08	67.3	66.79
139	Umea1-bin-0681	d__Bacteria;p__Pseudomonadota;c__Alphaproteobacteria;o__Pelagibacterales;f__Pelagibacteraceae;g__Fonsibacter;s__	A. borealis	SAR11-IIIb.4	66.72	66.71	66.07	66.7	65.89	65.91	66.36	65.91	66.33	66.26	66.31	66.32	65.72	66.54	66.5	66.36	66.38	66.14	66.29	66.31	66.71	66.03	66.53	66.7	66.49	66.18	66.14	65.43	66.25	66.67	66.52	66.47	66.67	66.68	66.59	66.07	66.63	66.62	66.12	66.74	66.18	66.95	67.01	67.17	66.76
140	Umea-bin-09620	d__Bacteria;p__Pseudomonadota;c__Alphaproteobacteria;o__Pelagibacterales;f__Pelagibacteraceae;g__Fonsibacter;s__	A. borealis	SAR11-IIIb.4	66.78	67.08	66.16	66.67	66.01	65.82	66.6	66.15	66.57	66.19	66.47	66.6	66.07	66.55	66.75	66.55	66.6	66.39	66.58	66.57	66.64	65.69	66.89	66.93	66.71	66.38	66.44	65.66	66.43	66.9	66.72	66.66	66.7	66.73	66.83	66.29	66.64	66.68	66.42	66.68	66.6	67.27	67.03	67.31	66.8
141	Ki3-D2-bin-0457	d__Bacteria;p__Pseudomonadota;c__Alphaproteobacteria;o__Pelagibacterales;f__Pelagibacteraceae;g__Fonsibacter;s__	unnamed group	SAR11-IIIb.5	66.9	67.05	66.12	67.15	66.13	65.87	66.53	66.3	66.49	66.45	66.57	66.63	65.91	66.3	66.3	66.38	66.45	66.01	66.45	66.47	66.45	66.36	66.63	66.89	66.65	66.36	66.22	65.45	66.47	66.04	66.68	66.71	66.81	66.43	66.54	66.42	66.6	66.59	66.55	66.44	66.4	67.21	67	67	66.62
142	LinL5-bin-0142	d__Bacteria;p__Pseudomonadota;c__Alphaproteobacteria;o__Pelagibacterales;f__Pelagibacteraceae;g__Fonsibacter;s__	unnamed group	SAR11-IIIb.5	67.27	67.63	66.6	67.27	66.41	66.34	66.87	66.57	66.99	66.59	67.07	66.81	66.37	66.74	66.78	66.91	67.01	66.8	66.88	66.87	66.84	66.65	66.92	66.9	66.76	66.73	66.72	65.85	66.67	66.67	66.94	66.95	66.94	67.11	66.9	66.49	66.82	66.95	66.97	66.83	66.89	67.36	67.46	67.27	66.94
143	Ki3-D3-bin-0033	d__Bacteria;p__Pseudomonadota;c__Alphaproteobacteria;o__Pelagibacterales;f__Pelagibacteraceae;g__Fonsibacter;s__	unnamed group	SAR11-IIIb.5	66.84	67.05	66.17	67.12	66.34	66.2	66.36	65.99	66.56	66.33	66.44	66.46	65.7	66.35	66.44	66.49	66.56	66.31	66.47	66.52	66.75	65.99	66.61	66.93	66.85	66.19	66.1	65.19	66.21	66.51	66.5	66.47	66.82	66.62	66.6	65.95	66.45	66.52	66.49	66.18	65.96	66.82	66.9	67.14	66.82
144	Ki3-D1-bin-0962	d__Bacteria;p__Pseudomonadota;c__Alphaproteobacteria;o__Pelagibacterales;f__Pelagibacteraceae;g__Fonsibacter;s__	unnamed group	SAR11-IIIb.5	66.74	67.06	66.08	66.72	66.01	66.2	66.56	66.03	66.69	66.25	66.44	66.53	65.93	66.29	66.35	66.55	66.58	66.3	66.43	66.52	66.57	65.97	66.61	66.76	66.55	66.48	66.21	65.13	66.28	66.45	66.56	66.71	66.57	66.4	66.46	66.08	66.25	66.56	66.52	66.55	66.26	67.12	66.91	67.13	66.54
145	Kiruna3-bin-0622	d__Bacteria;p__Pseudomonadota;c__Alphaproteobacteria;o__Pelagibacterales;f__Pelagibacteraceae;g__Fonsibacter;s__	unnamed group	SAR11-IIIb.5	66.9	67.25	66.24	66.85	66.13	66.28	66.52	66.17	66.65	66.33	66.52	66.76	66.33	66.45	66.56	66.73	66.67	66.56	66.72	66.66	66.64	66.28	66.89	66.9	66.52	66.69	66.1	65.32	66.1	66.53	66.64	66.55	66.85	66.53	66.53	65.79	66.6	66.67	67.05	66.52	66.62	67.4	66.94	67.35	66.82
146	LinL3-bin-0761	d__Bacteria;p__Pseudomonadota;c__Alphaproteobacteria;o__Pelagibacterales;f__Pelagibacteraceae;g__Fonsibacter;s__	unnamed group	SAR11-IIIb.5	66.83	67.25	66.2	67	65.83	66.01	66.34	65.97	66.59	66.32	66.38	66.26	66.13	66.28	66.31	66.35	66.45	66.19	66.37	66.34	66.26	65.8	66.36	66.62	66.59	66.12	66.06	65.46	65.99	66.04	66.66	66.5	66.43	66.3	66.27	65.94	66.3	66.24	66.36	66.16	66.21	66.66	66.95	66.92	66.57
147	Kiruna-bin-05406	d__Bacteria;p__Pseudomonadota;c__Alphaproteobacteria;o__Pelagibacterales;f__Pelagibacteraceae;g__Fonsibacter;s__	unnamed group	SAR11-IIIb.5	66.74	66.93	66.13	67.09	65.82	65.83	66.19	65.83	66.59	66.11	66.2	66.53	66.06	66.27	66.46	66.42	66.52	66.29	66.58	66.48	66.41	66.11	66.68	66.45	66.11	66.42	66.17	65.23	66.12	66.53	66.74	66.68	66.29	66.51	66.53	66.01	66.42	66.47	66.25	66.42	66.57	67.44	66.82	66.97	66.5
154	Baikal-deep-G36	d__Bacteria;p__Pseudomonadota;c__Alphaproteobacteria;o__Pelagibacterales;f__Pelagibacteraceae;g__Fonsibacter;s__Fonsibacter sp009693745	A. baikalensis	SAR11.IIIb.6	67.1	67.29	66.58	67.2	66.94	66.65	67.06	66.56	66.63	66.7	66.77	67.03	66.61	66.72	66.79	66.8	66.84	66.41	66.77	66.8	67.01	66.51	67.2	66.99	66.88	66.69	66.78	65.73	66.97	66.62	66.95	66.92	66.28	66.9	66.93	66.91	66.72	66.81	67.19	66.53	66.89	67.73	66.93	67.39	66.88
155	SI039_bin95	d__Bacteria;p__Pseudomonadota;c__Alphaproteobacteria;o__Pelagibacterales;f__Pelagibacteraceae;g__Fonsibacter;s__Fonsibacter sp018658635	unnamed group	SAR11.IIIb.7	66.67	66.85	66.03	66.35	65.96	66.11	66.46	65.98	66.24	65.83	66.22	66.32	65.87	66.36	66.36	66.46	66.42	66.19	66.35	66.5	66.24	66.46	66.38	66.46	66.35	66.21	66.05	65.33	66.26	66.55	66.4	66.28	66.24	66.2	66.29	65.99	66.31	66.34	66.28	66.12	66.39	66.55	66.61	67.01	66.24
156	N-InaH-25sep22-C54	d__Bacteria;p__Pseudomonadota;c__Alphaproteobacteria;o__Pelagibacterales;f__Pelagibacteraceae;g__Fonsibacter;s__Fonsibacter sp018658635	unnamed group	SAR11.IIIb.7	67.06	67.17	66.62	66.65	66.98	67.11	67.25	66.86	66.96	67.09	67.01	67.35	66.3	66.91	66.98	67.05	66.96	66.56	67.09	67.12	66.98	67.42	67.07	67.06	67.14	67.16	67.03	66.26	66.89	66.76	67.11	67.15	66.56	67	66.92	67.02	66.96	67.24	67.07	66.56	66.98	67.31	67.2	67.4	66.94
157	WB5_1B_059	d__Bacteria;p__Pseudomonadota;c__Alphaproteobacteria;o__Pelagibacterales;f__Pelagibacteraceae;g__Fonsibacter;s__Fonsibacter sp018658635	unnamed group	SAR11.IIIb.7	66.29	66.59	65.65	66.11	65.99	65.84	66.26	65.83	66.09	65.73	65.87	66.11	65.62	65.73	65.9	65.9	65.89	65.64	65.91	65.82	65.78	65.76	66.12	66.2	66.31	65.82	65.89	64.87	65.67	65.95	66.3	66.24	65.65	65.95	65.98	65.95	65.71	65.94	65.84	65.49	66.32	66.21	66.13	66.62	65.85
158	WB5_1A_055	d__Bacteria;p__Pseudomonadota;c__Alphaproteobacteria;o__Pelagibacterales;f__Pelagibacteraceae;g__Fonsibacter;s__Fonsibacter sp018658635	unnamed group	SAR11.IIIb.7	66.61	66.63	65.88	65.96	65.88	65.71	65.8	65.94	66.08	65.85	66.2	65.97	65.71	65.88	65.94	66.07	66.1	65.87	65.95	65.91	66.04	65.9	66.21	66.75	66.44	66.16	65.89	65.35	66.21	66.54	66.38	66.41	65.49	66.2	66.22	65.98	65.84	66.08	65.97	65.69	66.04	66.08	66.58	66.84	66.2
159	SCGC_AAA027-J10	d__Bacteria;p__Pseudomonadota;c__Alphaproteobacteria;o__Pelagibacterales;f__Pelagibacteraceae;g__Fonsibacter;s__Fonsibacter sp018882565	A. medardicus	SAR11.IIIb.8	66.85	67.11	66.4	66.34	66.43	66.09	66.86	66.26	66.42	66.72	66.58	66.5	65.94	66.72	66.63	66.92	66.81	66.47	66.88	67.01	66.56	66.31	67.19	67.27	66.65	66.66	66.44	65.3	66.91	66.87	66.8	67	66.61	66.86	66.85	66.56	66.7	66.76	67.17	66.94	66.92	67.34	67.06	67.56	67.15
160	N-Balt1-05jul22-002	d__Bacteria;p__Pseudomonadota;c__Alphaproteobacteria;o__Pelagibacterales;f__Pelagibacteraceae;g__Fonsibacter;s__Fonsibacter sp018882565	A. medardicus	SAR11.IIIb.8	66.85	66.83	66.34	66.56	66.61	66.6	66.92	66.38	66.48	66.81	66.61	66.92	66.43	66.7	66.82	66.74	66.73	66.29	66.78	66.72	66.76	66.75	66.68	66.97	66.62	66.74	66.43	65.63	66.81	66.48	66.85	66.69	66.16	66.76	66.8	66.47	66.87	66.84	66.96	66.39	66.8	67.26	66.7	67.27	66.92
161	N-Balt3-05jul22-017	d__Bacteria;p__Pseudomonadota;c__Alphaproteobacteria;o__Pelagibacterales;f__Pelagibacteraceae;g__Fonsibacter;s__Fonsibacter sp018882565	A. medardicus	SAR11.IIIb.8	66.99	67.07	66.39	66.75	66.76	66.36	66.86	66.58	66.76	66.6	66.86	66.98	66.55	66.67	66.84	66.89	66.88	66.54	66.86	66.93	66.86	66.89	66.88	67.15	67.04	66.58	66.56	65.26	67.01	66.56	66.9	66.81	66.77	66.86	66.9	66.57	66.88	67.07	67.21	66.6	66.98	67.44	66.96	67.59	67.07
162	ZLKRG47	d__Bacteria;p__Pseudomonadota;c__Alphaproteobacteria;o__Pelagibacterales;f__Pelagibacteraceae;g__Fonsibacter;s__Fonsibacter sp018882565	A. medardicus	SAR11.IIIb.8	66.88	67.07	66.53	67.01	66.62	66.37	66.94	66.3	66.66	66.34	66.56	66.63	66.4	66.83	66.77	66.83	66.78	66.28	66.78	66.82	66.77	66.67	66.75	67.07	66.85	66.53	66.4	65.67	66.65	66.72	66.74	66.66	66.56	66.93	66.9	66.55	66.6	66.69	66.84	66.59	66.67	67.1	66.94	67.19	66.71
163	SCGC_AAA027-L15	d__Bacteria;p__Pseudomonadota;c__Alphaproteobacteria;o__Pelagibacterales;f__Pelagibacteraceae;g__Fonsibacter;s__Fonsibacter sp018882565	A. medardicus	SAR11.IIIb.8	66.34	67.02	66.12	66.86	66.17	65.74	66.1	65.78	66.36	66.01	66.16	66.21	65.77	66.22	66.28	66.41	66.39	66.3	66.37	66.45	66.41	66.46	66.65	66.76	66.73	66.12	66.05	65.06	66.37	66.82	66.26	66.35	66.45	66.3	66.02	66.09	66.19	66.35	66.2	66.3	66.34	65.93	66.66	66.64	66.61
164	SCGC_AAA027-C06	d__Bacteria;p__Pseudomonadota;c__Alphaproteobacteria;o__Pelagibacterales;f__Pelagibacteraceae;g__Fonsibacter;s__Fonsibacter sp018882565	A. medardicus	SAR11.IIIb.8	66.35	66.95	65.93	66.85	66.33	66.25	66.73	66.12	66.19	65.9	66.34	66.36	66.2	66.23	66.27	66.42	66.52	66.06	66.48	66.44	66.32	66.77	66.42	66.5	66.56	66.36	65.96	65.41	66.05	66.83	66.29	66.27	66.21	66.38	66.36	66.01	66.22	66.33	66.56	66.47	66.39	66.45	66.8	66.93	66.64
165	ME-33	d__Bacteria;p__Pseudomonadota;c__Alphaproteobacteria;o__Pelagibacterales;f__Pelagibacteraceae;g__Fonsibacter;s__Fonsibacter sp018882565	A. medardicus	SAR11.IIIb.8	66.85	67.03	66.35	66.47	66.5	66.39	66.64	66.18	66.32	66.34	66.61	66.48	66.24	66.56	66.65	66.7	66.69	66.35	66.68	66.69	66.68	66.64	66.77	66.92	66.61	66.62	66.3	65.18	66.69	66.55	66.56	66.52	66.43	66.63	66.68	66.43	66.51	66.66	66.75	66.34	66.79	67.04	66.87	67.31	66.77
166	ME-31	d__Bacteria;p__Pseudomonadota;c__Alphaproteobacteria;o__Pelagibacterales;f__Pelagibacteraceae;g__Fonsibacter;s__Fonsibacter sp018882565	A. medardicus	SAR11.IIIb.8	66.72	66.98	66.28	66.74	66.32	66	66.54	66.1	66.32	66.41	66.4	66.58	66.19	66.32	66.57	66.52	66.48	66.37	66.63	66.57	66.45	66.48	66.49	66.83	66.67	66.59	66.29	65.37	66.43	66.65	66.56	66.58	66.38	66.65	66.56	66.14	66.5	66.46	66.58	66.25	66.62	66.88	66.8	67.28	66.8
167	ME-17	d__Bacteria;p__Pseudomonadota;c__Alphaproteobacteria;o__Pelagibacterales;f__Pelagibacteraceae;g__Fonsibacter;s__Fonsibacter sp018882565	A. medardicus	SAR11.IIIb.8	66.87	67.05	66.12	66.85	66.66	66.33	66.66	66.28	66.49	66.41	66.64	66.6	66.24	66.78	66.77	66.82	66.75	66.46	66.88	66.83	66.55	66.65	66.89	66.93	66.76	66.52	66.64	65.3	66.78	66.52	66.77	66.68	66.38	66.69	66.77	66.41	66.44	66.71	66.83	66.39	66.68	67.15	66.83	67.11	66.69
168	ME-20	d__Bacteria;p__Pseudomonadota;c__Alphaproteobacteria;o__Pelagibacterales;f__Pelagibacteraceae;g__Fonsibacter;s__Fonsibacter sp018882565	A. medardicus	SAR11.IIIb.8	66.67	66.88	66.14	66.92	66.48	66.24	66.51	66.28	66.4	66.21	66.48	66.4	66.09	66.67	66.52	66.69	66.59	66.42	66.77	66.75	66.59	66.6	66.56	66.91	66.74	66.38	66.35	65.24	66.71	66.56	66.57	66.56	66.42	66.64	66.61	66.44	66.24	66.54	66.84	66.07	66.51	66.81	66.84	67.07	66.73
169	ME-18	d__Bacteria;p__Pseudomonadota;c__Alphaproteobacteria;o__Pelagibacterales;f__Pelagibacteraceae;g__Fonsibacter;s__Fonsibacter sp018882565	A. medardicus	SAR11.IIIb.8	66.76	67	66.39	66.95	66.69	66.3	66.62	66.24	66.6	66.77	66.73	66.56	66.13	66.78	66.77	66.79	66.78	66.48	66.8	66.73	66.7	66.68	66.76	67.11	66.74	66.68	66.58	65.48	66.69	66.87	66.85	66.73	66.61	66.78	66.76	66.48	66.74	66.75	66.78	66.4	66.78	67.16	66.88	67.34	66.79
170	Fonsibacter_30-26	d__Bacteria;p__Pseudomonadota;c__Alphaproteobacteria;o__Pelagibacterales;f__Pelagibacteraceae;g__Fonsibacter;s__Fonsibacter sp000419465	A. abundans	SAR11.IIIb.9	66.9	66.95	66.25	66.58	66.36	66.6	66.56	66.38	66.62	66.33	66.49	66.66	66.18	66.61	66.74	66.67	66.71	66.31	66.72	66.66	66.72	66.65	66.55	66.81	66.59	66.53	66.49	65.43	66.55	66.41	66.62	66.5	66.4	66.65	66.67	66.26	66.5	66.71	66.77	66.48	66.8	67.06	66.81	67.26	66.86
171	MiE-29	d__Bacteria;p__Pseudomonadota;c__Alphaproteobacteria;o__Pelagibacterales;f__Pelagibacteraceae;g__Fonsibacter;s__	A. abundans	SAR11.IIIb.9	66.64	67.15	66.28	66.68	66.41	66.21	66.41	66.04	66.41	66.16	66.35	66.42	65.95	66.48	66.36	66.53	66.63	66.16	66.63	66.6	66.63	66.41	66.61	66.91	66.77	66.28	66.21	65.48	66.39	66.4	66.7	66.62	66.38	66.73	66.58	66.25	66.4	66.53	67	66.4	66.67	66.9	66.9	66.92	66.65
172	SCGC_AAA028-C07	d__Bacteria;p__Pseudomonadota;c__Alphaproteobacteria;o__Pelagibacterales;f__Pelagibacteraceae;g__Fonsibacter;s__Fonsibacter sp000419465	A. abundans	SAR11.IIIb.9	66.76	66.96	66.23	66.61	65.61	65.8	66.38	65.77	66.16	66.08	66.1	66.05	65.85	66.28	66.38	66.33	66.32	66.06	66.25	66.32	66.38	65.74	66.77	66.75	66.08	66.23	66.02	65.31	65.93	66.43	66.58	66.41	66.66	66.45	66.4	65.95	66.27	66.35	66.14	66.7	66.17	66.79	66.89	67.12	66.82
173	MK-138	d__Bacteria;p__Pseudomonadota;c__Alphaproteobacteria;o__Pelagibacterales;f__Pelagibacteraceae;g__Fonsibacter;s__	A. abundans	SAR11.IIIb.9	66.88	67.06	66.33	66.97	66.57	66.3	66.77	66.27	66.63	66.67	66.84	66.79	66.28	66.79	66.82	66.97	66.89	66.55	66.89	66.89	66.93	66.45	66.99	67.12	66.8	66.92	66.65	65.66	66.62	66.84	66.91	66.97	66.56	67.02	66.9	66.47	66.89	66.89	67.07	66.74	66.85	67.4	67.11	67.61	67.22
174	SCGC_AAA028-D10	d__Bacteria;p__Pseudomonadota;c__Alphaproteobacteria;o__Pelagibacterales;f__Pelagibacteraceae;g__Fonsibacter;s__Fonsibacter sp000510845	A. temperatus	SAR11.IIIb.10	66.67	66.62	66.11	66.35	66.05	66.24	66.77	66.04	66.26	66.26	66.35	66.33	66.15	66.57	66.49	66.56	66.5	66.35	66.49	66.61	66.57	66.2	66.67	66.8	66.38	66.4	66.15	64.79	66.68	66.74	66.68	66.58	66.83	66.72	66.68	66.18	66.5	66.59	66.54	66.28	66.71	67.18	66.95	67.36	66.55
175	N-ChH-26sep22-024	d__Bacteria;p__Pseudomonadota;c__Alphaproteobacteria;o__Pelagibacterales;f__Pelagibacteraceae;g__Fonsibacter;s__Fonsibacter sp000510845	A. temperatus	SAR11.IIIb.10	66.71	67.19	66.34	66.8	66.6	66.59	66.95	66.52	66.54	66.44	66.63	66.78	66.21	66.74	66.89	66.87	66.86	66.38	66.87	66.87	66.79	66.84	66.89	66.8	66.9	66.77	66.48	65.44	66.58	66.84	66.85	66.83	66.41	66.66	66.72	66.55	66.73	66.83	66.78	66.41	66.7	67.31	66.82	66.99	66.7
176	N-InaH-25sep22-023	d__Bacteria;p__Pseudomonadota;c__Alphaproteobacteria;o__Pelagibacterales;f__Pelagibacteraceae;g__Fonsibacter;s__	A. temperatus	SAR11.IIIb.10	66.95	67.13	66.65	66.7	66.47	66.52	66.89	66.43	66.93	66.44	66.96	66.9	66.17	66.97	66.91	66.83	66.81	66.59	66.71	66.82	66.77	66.27	67.28	67.02	67.24	66.67	66.59	65.74	66.59	66.9	66.78	66.76	66.49	66.79	66.81	66.82	66.72	66.83	66.76	66.86	66.86	66.64	67.14	67.14	67.08
178	N-ToyH-29sep22-008	d__Bacteria;p__Pseudomonadota;c__Alphaproteobacteria;o__Pelagibacterales;f__Pelagibacteraceae;g__Fonsibacter;s__Fonsibacter sp000510845	A. temperatus	SAR11.IIIb.10	66.85	67.12	66.43	66.56	66.78	66.71	67.04	66.39	66.79	66.61	66.83	66.9	66.25	66.72	66.84	66.89	66.93	66.31	66.95	66.94	66.86	66.77	66.9	66.89	66.74	66.82	66.73	65.77	66.87	66.67	67.05	66.9	66.43	66.88	66.93	66.69	66.93	66.99	66.97	66.53	67.09	67.14	67.02	67.28	66.84
179	LBMAG_Alphaproteobacteria_hypo.bin1_LD12	d__Bacteria;p__Pseudomonadota;c__Alphaproteobacteria;o__Pelagibacterales;f__Pelagibacteraceae;g__Fonsibacter;s__Fonsibacter sp000510845	A. temperatus	SAR11.IIIb.10	67.14	67.09	66.51	66.83	66.68	66.51	66.72	66.44	66.86	66.72	66.88	66.82	66.48	66.74	66.82	66.79	66.71	66.28	66.75	66.77	66.74	66.59	67.06	67.02	66.82	66.76	66.7	65.85	66.69	66.69	67.06	66.98	66.62	66.79	67.01	66.59	66.67	66.76	66.98	66.58	66.51	67.32	67.06	67.4	66.88
180	MsE-30jul19-LR-39c	d__Bacteria;p__Pseudomonadota;c__Alphaproteobacteria;o__Pelagibacterales;f__Pelagibacteraceae;g__Fonsibacter;s__Fonsibacter sp000510845	A. temperatus	SAR11.IIIb.10	66.69	66.96	66.4	66.65	66.46	66.23	66.82	66.25	66.33	66.33	66.46	66.58	66.1	66.64	66.6	66.79	66.77	66.25	66.66	66.72	66.82	66.56	66.7	66.86	66.66	66.42	66.31	65.23	66.62	66.1	66.65	66.56	66.13	66.55	66.42	66.41	66.26	66.55	66.64	66.22	66.71	67.13	66.83	67.09	66.71
181	ZE-13nov19-LR-1	d__Bacteria;p__Pseudomonadota;c__Alphaproteobacteria;o__Pelagibacterales;f__Pelagibacteraceae;g__Fonsibacter;s__Fonsibacter sp000510845	A. temperatus	SAR11.IIIb.10	66.84	67.03	66.25	66.71	66.61	66.47	66.77	66.41	66.66	66.48	66.67	66.85	66.26	66.68	66.68	66.84	66.81	66.47	66.78	66.81	66.7	66.42	66.81	67.1	66.84	66.8	66.5	65.61	66.62	66.38	66.72	66.62	66.35	66.69	66.84	66.56	66.78	66.76	67.01	66.46	66.93	66.99	66.99	67.36	66.91
182	ZE-03apr19-LR-3	d__Bacteria;p__Pseudomonadota;c__Alphaproteobacteria;o__Pelagibacterales;f__Pelagibacteraceae;g__Fonsibacter;s__Fonsibacter sp000510845	A. temperatus	SAR11.IIIb.10	66.88	67.05	66.37	66.98	66.16	66.32	66.85	66.21	66.71	66.1	66.39	66.52	66.11	66.47	66.57	66.6	66.55	66.36	66.58	66.61	66.46	66.37	66.63	66.97	66.77	66.31	66.25	65.54	66.38	66.64	66.41	66.5	66.59	66.54	66.63	66.34	66.44	66.58	66.45	66.37	66.76	66.92	66.95	67.25	66.78
183	N-ChE-26sep22-047	d__Bacteria;p__Pseudomonadota;c__Alphaproteobacteria;o__Pelagibacterales;f__Pelagibacteraceae;g__Fonsibacter;s__Fonsibacter sp000510845	A. temperatus	SAR11.IIIb.10	66.7	66.96	66.21	66.8	66.21	65.99	66.74	66.13	66.43	66.05	66.26	66.52	65.87	66.43	66.53	66.7	66.6	66.39	66.67	66.63	66.47	66.17	66.57	66.69	66.65	66.31	66.11	65.67	66.3	66.49	66.64	66.56	66.35	66.36	66.42	66.13	66.26	66.43	66.39	66.24	66.52	66.83	66.79	67.12	66.84
184	3300027940-3	d__Bacteria;p__Pseudomonadota;c__Alphaproteobacteria;o__Pelagibacterales;f__Pelagibacteraceae;g__Fonsibacter;s__Fonsibacter sp000510845	A. temperatus	SAR11.IIIb.10	67.04	67.36	66.83	66.87	66.84	66.84	67.14	66.62	67.14	66.67	66.98	67.19	66.71	67.09	67.13	67.13	67.17	66.82	67.09	67.15	67.06	66.54	66.98	66.87	66.84	66.61	66.75	66.06	66.78	66.79	67.13	67.1	66.74	67.06	66.99	66.8	66.88	67.14	67.02	67.16	66.71	67.66	67.53	67.45	66.98
185	SupBloom_Metag_065	d__Bacteria;p__Pseudomonadota;c__Alphaproteobacteria;o__Pelagibacterales;f__Pelagibacteraceae;g__Fonsibacter;s__Fonsibacter sp000510845	A. temperatus	SAR11.IIIb.10	66.63	66.73	66.16	66.95	65.82	65.81	66.69	65.93	66.45	66.23	66.26	66.44	65.82	66.37	66.42	66.32	66.33	66.28	66.39	66.34	66.4	65.72	66.4	66.64	66.34	66.19	66.06	65.25	66.02	66.77	66.58	66.49	66.2	66.36	66.52	65.87	66.17	66.23	65.94	66.12	66.14	67.21	66.58	67.24	66.66
186	3300026931-2	d__Bacteria;p__Pseudomonadota;c__Alphaproteobacteria;o__Pelagibacterales;f__Pelagibacteraceae;g__Fonsibacter;s__Fonsibacter sp000510845	A. temperatus	SAR11.IIIb.10	66.87	67.18	66.5	66.99	66.33	66.25	66.89	66.32	66.87	66.43	66.51	66.67	66.17	66.66	66.69	66.67	66.74	66.34	66.75	66.69	66.66	66.42	66.84	67.11	67.05	66.61	66.51	65.53	66.75	66.53	66.57	66.57	66.66	66.61	66.73	66.43	66.37	66.59	66.49	66.46	66.62	66.62	66.84	67.29	66.73
187	MoE-02may19-314	d__Bacteria;p__Pseudomonadota;c__Alphaproteobacteria;o__Pelagibacterales;f__Pelagibacteraceae;g__Fonsibacter;s__Fonsibacter sp000510845	A. temperatus	SAR11.IIIb.10	67.1	67.25	66.35	67	66.56	66.61	66.88	66.28	66.74	66.26	66.54	66.62	66.07	66.66	66.74	66.88	66.94	66.66	66.95	66.9	66.79	66.38	66.6	66.95	66.69	66.56	66.52	65.56	66.68	66.71	66.76	66.65	66.61	66.82	66.79	66.21	66.63	66.81	66.81	66.41	66.69	67.27	66.99	67.14	66.67
188	MoH-23oct19-50	d__Bacteria;p__Pseudomonadota;c__Alphaproteobacteria;o__Pelagibacterales;f__Pelagibacteraceae;g__Fonsibacter;s__Fonsibacter sp000510845	A. temperatus	SAR11.IIIb.10	67.19	67.41	66.34	66.99	65.98	66.1	67.29	66.38	66.98	66.33	66.55	66.77	66.31	66.66	66.65	66.71	66.83	66.59	66.72	66.88	66.73	66.41	66.67	67.02	66.71	66.54	66.53	65.95	66.61	66.24	66.89	66.81	66.67	66.68	66.89	66.39	66.64	66.74	66.4	66.46	66.72	68.07	67.28	67.99	67.08
189	3300027563-31	d__Bacteria;p__Pseudomonadota;c__Alphaproteobacteria;o__Pelagibacterales;f__Pelagibacteraceae;g__Fonsibacter;s__Fonsibacter sp000510845	A. temperatus	SAR11.IIIb.10	67.42	67.59	67.07	67.24	66.95	66.57	67.46	66.82	67.1	67.16	66.98	66.87	66.84	67.05	67.06	67.21	67.06	66.92	67.13	67.18	67.39	66.69	67.18	67.03	66.96	66.85	66.86	66.31	67.29	67.02	67.25	67.02	66.87	67.11	67.07	66.73	66.92	67.14	67	67.41	67.02	67.95	67.52	67.72	67.25
190	3300027688-45	d__Bacteria;p__Pseudomonadota;c__Alphaproteobacteria;o__Pelagibacterales;f__Pelagibacteraceae;g__Fonsibacter;s__Fonsibacter sp000510845	A. temperatus	SAR11.IIIb.10	67.27	67.87	66.91	67.16	66.71	66.92	68.06	66.79	67.24	66.76	67.2	67.19	66.84	67.19	67.56	67.43	67.43	67.18	67.46	67.48	67.34	67.28	67.23	67.58	67.31	66.96	67.18	66.57	67.3	66.99	67.13	67.11	67.41	67.54	67.55	67.09	67.14	67.55	67.14	67.43	67.47	67.88	67.83	68.2	67.69
191	3300027224-14	d__Bacteria;p__Pseudomonadota;c__Alphaproteobacteria;o__Pelagibacterales;f__Pelagibacteraceae;g__Fonsibacter;s__Fonsibacter sp000510845	A. temperatus	SAR11.IIIb.10	67.02	67.48	66.68	66.93	66.45	66.64	67.02	66.52	67.15	66.9	66.69	66.96	66.15	66.92	66.77	67.09	67.1	66.96	67.08	67.07	66.84	66.51	66.81	67.11	67.11	67.07	66.73	66.05	66.82	66.82	66.8	66.75	66.73	66.8	66.94	66.51	66.58	66.8	66.81	66.54	66.66	66.77	67.27	67.32	67.02
192	3300027211-13	d__Bacteria;p__Pseudomonadota;c__Alphaproteobacteria;o__Pelagibacterales;f__Pelagibacteraceae;g__Fonsibacter;s__Fonsibacter sp000510845	A. temperatus	SAR11.IIIb.10	66.97	67.26	66.72	67.02	66.33	66.51	66.96	66.12	67.04	66.37	66.56	66.8	66.47	66.78	66.79	67	66.89	66.83	67.09	66.95	66.91	66.77	67	67.04	67.03	66.63	66.61	65.5	66.64	66.47	67.02	66.85	66.42	66.81	66.78	66.49	66.24	66.74	66.98	67.08	66.8	66.98	67.12	67.59	66.71
193	3300027756-64	d__Bacteria;p__Pseudomonadota;c__Alphaproteobacteria;o__Pelagibacterales;f__Pelagibacteraceae;g__Fonsibacter;s__Fonsibacter sp000510845	A. temperatus	SAR11.IIIb.10	66.47	66.55	65.98	66.13	65.86	65.7	66.26	65.62	66.1	66.14	66.13	66.16	65.66	66.05	66.13	66.37	66.3	66.11	66.33	66.32	66.26	65.85	66.08	66.04	66.39	66.3	65.9	64.97	66.07	65.82	66.38	66.38	66.09	66.16	66.15	66.04	65.95	66.33	66.3	66.34	66.42	66.47	66.57	66.79	66.27
194	3300027149-15	d__Bacteria;p__Pseudomonadota;c__Alphaproteobacteria;o__Pelagibacterales;f__Pelagibacteraceae;g__Fonsibacter;s__Fonsibacter sp000510845	A. temperatus	SAR11.IIIb.10	67.29	67.28	66.63	67.48	66.66	66.43	67.23	66.33	66.78	66.65	66.67	66.84	66.36	66.94	67.06	67.08	67.11	66.94	67.13	67.17	67.09	66.77	67.33	66.99	66.72	66.9	66.56	66.22	66.72	66.84	67.11	67.08	66.97	67.27	67.07	66.3	66.94	66.95	66.81	67.5	66.9	67.6	67.5	67.78	67.42
195	3300027150-18	d__Bacteria;p__Pseudomonadota;c__Alphaproteobacteria;o__Pelagibacterales;f__Pelagibacteraceae;g__Fonsibacter;s__Fonsibacter sp000510845	A. temperatus	SAR11.IIIb.10	67.66	67.69	67.24	67.2	66.82	67.28	67.45	66.75	67.26	67.33	67.17	67.3	66.69	67.37	67.2	67.51	67.45	67.11	67.48	67.49	67.61	66.68	67.58	67.5	67.2	67.2	67.14	65.86	67.27	67.23	67.48	67.43	67.25	67.4	67.51	66.92	67.08	67.25	67.39	67.66	67.12	68.32	67.85	68.59	67.69
196	3300027147-14	d__Bacteria;p__Pseudomonadota;c__Alphaproteobacteria;o__Pelagibacterales;f__Pelagibacteraceae;g__Fonsibacter;s__Fonsibacter sp000510845	A. temperatus	SAR11.IIIb.10	67.25	67.55	66.69	67.73	66.23	66.3	67.24	66.31	66.84	66.99	66.72	66.68	66.29	66.9	67.01	67.17	67.11	67.03	67.22	67.19	67.08	66.75	67.15	66.86	66.44	67.13	66.45	66.21	66.51	67.19	67.09	66.98	66.87	67.22	67.09	66.03	66.72	66.93	66.61	67.72	66.91	68.09	67.67	67.9	67.2
197	N-InaE-25sep22-010	d__Bacteria;p__Pseudomonadota;c__Alphaproteobacteria;o__Pelagibacterales;f__Pelagibacteraceae;g__Fonsibacter;s__Fonsibacter sp000371845	A. universalis	SAR11.IIIb.11	66.76	67.16	66.25	66.77	65.97	66.13	66.67	65.87	66.55	66.16	66.38	66.54	66.03	66.49	66.5	66.6	66.58	66.34	66.54	66.5	66.48	66.11	66.69	66.73	66.61	66.44	66.24	65.63	66.36	66.8	66.69	66.59	66.32	66.49	66.47	66.13	66.53	66.56	66.36	66.65	66.52	66.86	67.22	67.1	66.76
198	LinL5-bin-0670	d__Bacteria;p__Pseudomonadota;c__Alphaproteobacteria;o__Pelagibacterales;f__Pelagibacteraceae;g__Fonsibacter;s__Fonsibacter sp000371845	A. universalis	SAR11.IIIb.11	67.14	67.21	66.65	67	66.62	66.48	66.83	66.41	67.07	66.46	66.49	66.84	66.35	66.81	67.05	67.05	67.24	66.71	67.21	67.11	66.96	66.59	67.12	67.05	66.74	66.85	66.59	65.98	66.76	66.77	66.92	67.07	66.53	66.93	66.93	66.5	66.64	66.86	66.93	66.81	66.67	67.5	67.3	67.76	67.06
199	LJ-bin-0735	d__Bacteria;p__Pseudomonadota;c__Alphaproteobacteria;o__Pelagibacterales;f__Pelagibacteraceae;g__Fonsibacter;s__Fonsibacter sp000371845	A. universalis	SAR11.IIIb.11	66.85	67.32	66.66	67.01	66.42	66.1	66.42	66.04	66.69	66.71	66.63	66.57	65.87	66.6	66.66	66.82	66.77	66.53	66.76	66.79	66.75	66.25	66.71	67.17	66.8	66.63	66.15	65.61	66.35	67.08	66.75	66.8	66.62	66.78	66.84	66.1	66.55	66.68	66.56	66.62	66.62	67.56	66.95	67.74	66.93
200	LJ-7-9m-bin-1186	d__Bacteria;p__Pseudomonadota;c__Alphaproteobacteria;o__Pelagibacterales;f__Pelagibacteraceae;g__Fonsibacter;s__Fonsibacter sp000371845	A. universalis	SAR11.IIIb.11	68.13	68.05	67.25	67.7	67.24	67.3	67.58	67	67.57	67.77	67.55	67.6	67.08	67.65	67.72	67.88	67.92	67.28	67.84	67.8	67.89	67.3	67.97	67.64	67.54	67.72	67.46	66.45	67.66	67.63	67.93	67.95	67.44	67.83	68	67.41	67.8	67.79	67.96	67.76	67.69	68.74	67.91	68.4	68.01
201	LJ-3-15m-bin-0070	d__Bacteria;p__Pseudomonadota;c__Alphaproteobacteria;o__Pelagibacterales;f__Pelagibacteraceae;g__Fonsibacter;s__Fonsibacter sp000371845	A. universalis	SAR11.IIIb.11	67.28	67.53	66.73	67.54	66.6	66.6	67.02	66.59	66.79	67.03	67.03	66.8	66.42	67.06	67.27	67.11	67.13	66.91	67.15	67.09	67.13	66.28	67.39	67.32	67.1	67.01	66.8	65.78	67.02	67.42	67.19	67.12	66.94	67.17	67.23	66.58	66.87	66.94	67.01	67.19	66.59	67.92	67.61	67.81	67.41
204	WB5_1B_032	d__Bacteria;p__Pseudomonadota;c__Alphaproteobacteria;o__Pelagibacterales;f__Pelagibacteraceae;g__Fonsibacter;s__Fonsibacter sp000371845	A. universalis	SAR11.IIIb.11	66.9	66.77	66.38	67.16	66.16	65.93	66.55	66.04	66.38	66.69	66.44	66.34	65.92	66.67	66.56	66.6	66.58	66.42	66.61	66.64	66.72	65.98	66.62	66.51	66.38	66.44	66.04	66.04	66.03	66.56	66.48	66.55	66.53	66.63	66.7	66.07	66.78	66.56	66.1	66.72	66.76	67.19	66.79	67.35	66.78
205	SCGC_AAA280-P20	d__Bacteria;p__Pseudomonadota;c__Alphaproteobacteria;o__Pelagibacterales;f__Pelagibacteraceae;g__Fonsibacter;s__Fonsibacter sp000371845	A. universalis	SAR11.IIIb.11	67.07	66.66	66.16	67.03	66.6	66.14	66.85	66.18	66.46	66.97	66.62	66.77	66.57	66.56	66.54	66.79	66.77	66.28	66.79	66.77	66.5	66.71	66.44	66.27	66.51	66.35	66.25	65.37	66.55	66.19	66.45	66.68	66.16	66.66	66.64	66.5	66.61	66.61	66.64	66.1	66.42	67.04	66.45	67.2	66.55
206	N-IMU-22jan24-050	d__Bacteria;p__Pseudomonadota;c__Alphaproteobacteria;o__Pelagibacterales;f__Pelagibacteraceae;g__Fonsibacter;s__	A. lacus	SAR11.IIIb.12	66.99	66.95	66.45	67.1	66.1	66.32	66.89	66.25	66.67	66.65	66.6	66.75	66.34	66.71	66.75	66.78	66.75	66.53	66.86	66.75	66.82	66.61	66.92	67.16	66.7	66.63	66.59	65.56	66.46	66.85	67.11	67.13	66.86	66.83	66.82	66.4	66.81	66.83	66.78	66.7	66.75	67.41	67.35	67.74	67.02
207	N-BarE-26apr23-C31	d__Bacteria;p__Pseudomonadota;c__Alphaproteobacteria;o__Pelagibacterales;f__Pelagibacteraceae;g__Fonsibacter;s__Fonsibacter lacus	A. lacus	SAR11.IIIb.13	66.87	66.89	66.42	66.88	66.4	66.28	66.67	66.25	66.61	66.74	66.79	66.6	66.41	66.78	66.81	67.01	66.9	66.52	66.91	66.96	66.78	66.77	66.78	66.93	66.63	66.74	66.62	65.69	66.72	66.69	67.02	66.92	66.6	66.92	66.88	66.35	66.71	66.82	66.81	66.8	66.73	67.31	67.26	67.39	67.13
208	WB9_1B_004	d__Bacteria;p__Pseudomonadota;c__Alphaproteobacteria;o__Pelagibacterales;f__Pelagibacteraceae;g__Fonsibacter;s__Fonsibacter lacus	A. lacus	SAR11.IIIb.13	67.59	67.64	67.25	67.38	66.92	67.04	67.45	66.98	67.21	67.35	67.29	67.29	66.73	67.31	67.51	67.45	67.41	66.97	67.41	67.45	67.34	67.06	67.79	67.48	66.87	67.17	67.05	66.37	67.19	67.32	67.33	67.29	66.7	67.52	67.41	66.84	67.21	67.27	67.3	67.47	67.06	68.07	67.72	67.98	67.57
209	WB8_2B_005	d__Bacteria;p__Pseudomonadota;c__Alphaproteobacteria;o__Pelagibacterales;f__Pelagibacteraceae;g__Fonsibacter;s__Fonsibacter lacus	A. lacus	SAR11.IIIb.13	67.21	67.72	66.94	67.13	66.69	66.28	67.17	66.41	66.95	66.84	67.05	66.83	66.46	66.92	67	66.98	66.99	66.41	66.89	66.95	67	66.75	67.29	67.35	66.59	66.86	66.67	65.96	66.81	67.07	67.28	67.08	67.06	67.23	67.17	66.64	67.01	67.08	66.85	67.05	66.67	67.87	67.43	67.78	67
210	WB7_6_001	d__Bacteria;p__Pseudomonadota;c__Alphaproteobacteria;o__Pelagibacterales;f__Pelagibacteraceae;g__Fonsibacter;s__Fonsibacter lacus	A. lacus	SAR11.IIIb.13	67.16	66.92	66.46	67.06	67.16	67.14	67.23	66.53	66.7	66.84	66.98	67.14	66.78	66.81	67.25	67.24	67.22	66.41	67.21	67.28	66.97	67.24	67.02	67.09	66.5	67.03	66.69	65.61	66.93	66.79	67.13	67.08	66.69	67.07	66.97	66.84	67.11	67.06	67.01	66.64	67.11	67.84	67.11	67.65	66.83
211	WB6_6_002	d__Bacteria;p__Pseudomonadota;c__Alphaproteobacteria;o__Pelagibacterales;f__Pelagibacteraceae;g__Fonsibacter;s__Fonsibacter lacus	A. lacus	SAR11.IIIb.13	67.19	67.19	66.54	66.87	66.99	66.91	67.24	66.62	66.69	67.04	66.87	66.95	66.62	67.03	67.09	67.22	67.25	66.69	67.3	67.29	67.14	66.89	67.08	67.28	66.63	66.92	66.68	65.85	66.98	66.95	67.15	67.22	66.9	67.17	67.07	66.81	67.24	67.19	67.12	66.91	66.88	68.08	67.18	67.56	67.07
212	WB8_6_001	d__Bacteria;p__Pseudomonadota;c__Alphaproteobacteria;o__Pelagibacterales;f__Pelagibacteraceae;g__Fonsibacter;s__Fonsibacter lacus	A. lacus	SAR11.IIIb.13	67.29	67.55	66.71	67	66.93	67.11	67.36	66.57	66.76	66.97	66.92	67	66.88	67.28	67.35	67.38	67.37	66.72	67.37	67.31	67.29	66.66	67.35	67.3	66.91	67.12	66.88	66.11	66.9	66.78	67.34	67.26	66.53	67.36	67.26	66.93	67.23	67.25	67.28	67.14	66.99	68.51	67.23	67.98	67.29
213	WB9_1A_004	d__Bacteria;p__Pseudomonadota;c__Alphaproteobacteria;o__Pelagibacterales;f__Pelagibacteraceae;g__Fonsibacter;s__Fonsibacter lacus	A. lacus	SAR11.IIIb.13	67.37	67.56	66.94	67.38	66.5	66.49	67.31	66.59	67.25	66.76	66.96	67.17	66.53	66.96	67.14	67.18	67.17	66.93	67.22	67.18	67.07	66.42	67.14	67.18	66.78	66.74	66.85	66.48	66.94	67.14	67.16	67.16	66.91	67.12	67.03	66.74	66.91	67.09	66.98	67.21	66.8	67.35	67.39	67.77	67.34
214	WB7_2A_002	d__Bacteria;p__Pseudomonadota;c__Alphaproteobacteria;o__Pelagibacterales;f__Pelagibacteraceae;g__Fonsibacter;s__Fonsibacter lacus	A. lacus	SAR11.IIIb.13	67.05	66.91	66.58	67.36	66.44	66.56	66.99	66.4	66.58	66.57	66.7	66.68	66.78	66.84	66.82	66.91	66.84	66.56	66.83	66.85	66.9	66.14	67.12	67.01	66.37	66.53	66.6	66.16	66.74	67.03	67.09	66.94	66.64	67.05	66.88	66.36	66.74	66.68	66.55	66.84	66.46	67.36	67.26	67.9	67
215	WBA_1A_005	d__Bacteria;p__Pseudomonadota;c__Alphaproteobacteria;o__Pelagibacterales;f__Pelagibacteraceae;g__Fonsibacter;s__Fonsibacter lacus	A. lacus	SAR11.IIIb.13	67.65	67.5	67.08	67.38	66.89	66.52	67.33	66.68	67.03	66.88	67.05	67.08	66.64	67.15	67.19	67.38	67.31	66.84	67.23	67.28	67.26	66.93	67.55	67.57	66.86	67.08	66.79	66.21	67.19	67.15	67.24	67.35	66.98	67.27	67.23	67.04	67.07	67.12	66.93	67.2	66.74	67.93	67.75	67.84	67.54
216	WB8_2A_004	d__Bacteria;p__Pseudomonadota;c__Alphaproteobacteria;o__Pelagibacterales;f__Pelagibacteraceae;g__Fonsibacter;s__Fonsibacter lacus	A. lacus	SAR11.IIIb.13	67.18	67.31	66.61	66.93	66.59	66.46	67.16	66.3	66.77	66.43	66.71	66.85	66.38	66.83	66.95	67	67.04	66.64	67.03	67.07	66.87	66.29	67.05	66.94	66.65	66.88	66.66	66.27	66.83	66.94	66.97	66.86	66.86	67.02	67.02	66.32	66.82	66.91	66.57	67.02	66.54	67.29	67.17	67.76	67.25
217	WB6_3B_008	d__Bacteria;p__Pseudomonadota;c__Alphaproteobacteria;o__Pelagibacterales;f__Pelagibacteraceae;g__Fonsibacter;s__Fonsibacter lacus	A. lacus	SAR11.IIIb.13	67.33	67.23	66.89	67.41	66.57	66.65	67.32	66.46	66.98	67.03	67.04	67.12	66.8	67.08	67.28	67.51	67.27	66.99	67.32	67.34	67.22	66.76	67.21	66.99	66.69	66.93	66.88	66.3	67.11	67.06	67.37	67.2	66.87	67.11	67.17	66.75	67.13	67.06	66.94	66.99	66.75	68.03	67.49	67.64	67.21
218	WB6_3A_008	d__Bacteria;p__Pseudomonadota;c__Alphaproteobacteria;o__Pelagibacterales;f__Pelagibacteraceae;g__Fonsibacter;s__Fonsibacter lacus	A. lacus	SAR11.IIIb.13	68.31	68.03	67.24	68.18	67.23	67.23	67.69	66.94	67.52	67.46	67.36	67.42	67.1	67.63	67.54	67.88	67.81	67.31	67.81	67.8	67.71	67.12	67.74	67.64	66.71	67.17	67.31	66.92	67.45	67.55	67.77	67.65	67.44	67.68	67.69	67.31	67.72	67.79	67.24	67.75	67.27	68.39	68.3	68.28	67.86
219	WB7_1B_004	d__Bacteria;p__Pseudomonadota;c__Alphaproteobacteria;o__Pelagibacterales;f__Pelagibacteraceae;g__Fonsibacter;s__Fonsibacter lacus	A. lacus	SAR11.IIIb.13	67.57	67.64	66.86	67.59	66.79	66.77	67.33	66.61	67.22	67.08	67.01	66.91	66.87	67.01	67.24	67.4	67.4	67.01	67.33	67.35	67.36	67.2	67.12	67.11	66.86	67.05	66.86	66.41	67.3	67.01	67.3	67.31	67.01	67.28	67.23	66.75	67.1	67.17	67.1	67.36	66.83	67.53	67.52	67.75	67.37
220	WB6_2B_004	d__Bacteria;p__Pseudomonadota;c__Alphaproteobacteria;o__Pelagibacterales;f__Pelagibacteraceae;g__Fonsibacter;s__Fonsibacter lacus	A. lacus	SAR11.IIIb.13	66.33	66.66	66.15	66.48	65.79	66.06	66.32	65.96	66.14	66.1	66.27	66.01	65.96	66.22	66.37	66.4	66.35	66.19	66.41	66.37	66.22	66.03	66.33	66.24	65.74	66.31	65.86	65.43	66.09	66.1	66.3	66.14	66.26	66.38	66.29	65.92	66.14	66.14	66.14	65.88	65.96	66.66	66.47	66.53	66.2
221	N-SamH-20apr23-C70	d__Bacteria;p__Pseudomonadota;c__Alphaproteobacteria;o__Pelagibacterales;f__Pelagibacteraceae;g__Fonsibacter;s__Fonsibacter lacus	A. lacus	SAR11.IIIb.13	67.51	67.47	66.64	67.57	66.74	66.44	67.16	66.85	66.99	67.06	67.27	67.52	66.9	67.24	67.34	67.25	67.28	66.96	67.27	67.26	67.18	67.02	67.23	67.41	67.08	67.13	67.06	66.32	67.12	67.11	67.51	67.43	67.15	67.42	67.28	66.98	67.1	67.16	67.01	66.45	67.1	67.76	67.57	68.14	67.72
222	LLD_006	d__Bacteria;p__Pseudomonadota;c__Alphaproteobacteria;o__Pelagibacterales;f__Pelagibacteraceae;g__Fonsibacter;s__Fonsibacter lacus	A. lacus	SAR11.IIIb.13	67.04	66.84	66.52	67.29	66.45	66.24	66.29	66.18	66.43	66.63	66.75	66.59	66.28	66.63	66.72	66.81	66.82	66.53	66.86	66.75	66.69	66.65	66.93	66.69	66.58	66.57	66.4	65.67	66.62	66.75	66.72	66.72	66.87	66.8	66.73	66.45	66.66	66.73	66.59	66.41	66.33	66.87	67.1	67.16	66.81
223	WB9_2_006	d__Bacteria;p__Pseudomonadota;c__Alphaproteobacteria;o__Pelagibacterales;f__Pelagibacteraceae;g__Fonsibacter;s__Fonsibacter lacus	A. lacus	SAR11.IIIb.13	67.08	67.17	66.78	67.66	66.46	66.21	67.24	66.29	66.8	66.41	66.63	66.61	66.56	66.66	66.85	66.88	66.87	66.53	66.95	66.95	66.92	66.58	66.94	67.02	66.37	66.73	66.47	66	66.86	66.74	66.86	66.76	66.7	67.01	66.83	66.58	66.9	66.85	66.55	66.92	66.48	67.42	67.11	67.53	66.99
224	WBA_1B_005	d__Bacteria;p__Pseudomonadota;c__Alphaproteobacteria;o__Pelagibacterales;f__Pelagibacteraceae;g__Fonsibacter;s__Fonsibacter lacus	A. lacus	SAR11.IIIb.13	67.58	67.52	66.99	67.47	66.77	66.99	67.27	66.77	67.19	67.36	67.31	67.24	66.93	67.43	67.53	67.46	67.5	67.12	67.57	67.49	67.47	67.01	67.5	67.49	66.8	67.04	66.94	66.66	67.22	67.4	67.58	67.55	66.94	67.38	67.44	66.87	67.26	67.28	67.32	67.74	67.04	68.14	67.85	68.18	67.82
225	WB8_1A_003	d__Bacteria;p__Pseudomonadota;c__Alphaproteobacteria;o__Pelagibacterales;f__Pelagibacteraceae;g__Fonsibacter;s__Fonsibacter lacus	A. lacus	SAR11.IIIb.13	68.02	67.95	67.34	68.28	67.3	67.2	68.16	67.22	67.92	67.97	67.65	67.76	67.37	67.74	67.93	67.87	67.84	67.43	67.86	67.86	67.76	67.29	67.82	67.96	66.98	67.64	67.48	67.12	67.77	67.71	68.15	68.01	67.48	67.87	67.95	67.15	67.8	67.88	67.72	68.2	67.6	68.39	68.21	68.54	68.04
226	WB7_1C_004	d__Bacteria;p__Pseudomonadota;c__Alphaproteobacteria;o__Pelagibacterales;f__Pelagibacteraceae;g__Fonsibacter;s__Fonsibacter lacus	A. lacus	SAR11.IIIb.13	67.49	67.19	66.86	67.7	66.54	66.79	67.37	66.75	67.29	67.25	67.23	67.25	66.99	67.29	67.23	67.26	67.21	66.79	67.23	67.29	67.29	66.59	67.47	67.59	67	67.12	67.07	66.5	67.22	67.05	67.56	67.37	67.14	67.41	67.34	67.12	67.19	67.23	67.28	67.28	67.11	68.28	67.49	67.9	67.39
227	WB7_2B_003	d__Bacteria;p__Pseudomonadota;c__Alphaproteobacteria;o__Pelagibacterales;f__Pelagibacteraceae;g__Fonsibacter;s__Fonsibacter lacus	A. lacus	SAR11.IIIb.13	67.23	66.98	66.72	67.01	66.15	66.52	66.72	66.25	66.66	66.45	66.45	66.61	66.09	66.76	66.73	66.87	66.89	66.49	66.86	66.86	66.71	66.65	66.99	66.76	66.33	66.56	66.53	66.29	66.57	67.27	66.86	66.84	66.54	66.85	66.72	66.4	66.79	66.79	66.41	66.84	66.61	67.48	67.05	67.28	66.91
228	WB6_2A_004	d__Bacteria;p__Pseudomonadota;c__Alphaproteobacteria;o__Pelagibacterales;f__Pelagibacteraceae;g__Fonsibacter;s__Fonsibacter lacus	A. lacus	SAR11.IIIb.13	67.47	67.23	66.71	67.04	66.48	66.49	67.08	66.25	66.8	66.84	66.88	66.91	66.33	66.83	66.95	66.92	66.96	66.56	67	66.99	67.01	66.2	67.15	67.23	66.52	66.94	66.58	66.34	66.69	66.39	67.08	67.07	66.89	67.09	67.04	66.5	67.01	66.99	66.8	67.07	66.69	67.51	67.45	67.69	67.19
229	N-SamH-20apr23-026	d__Bacteria;p__Pseudomonadota;c__Alphaproteobacteria;o__Pelagibacterales;f__Pelagibacteraceae;g__Fonsibacter;s__Fonsibacter sp023257975	A. subtropicus	SAR11.IIIb.14	67.05	67.08	66.36	66.91	66.8	66.47	67.21	66.7	66.89	66.78	66.9	66.94	66.54	66.9	66.95	66.98	67.01	66.67	67	67.04	67.03	66.66	67.25	67.2	66.93	66.89	66.87	65.65	66.81	66.98	66.99	67.1	66.87	67.09	66.9	66.78	67.05	67.03	67.02	67.02	67.04	67.55	67.37	67.59	67.09
230	N-BarE-26apr23-064	d__Bacteria;p__Pseudomonadota;c__Alphaproteobacteria;o__Pelagibacterales;f__Pelagibacteraceae;g__Fonsibacter;s__Fonsibacter sp023257975	A. subtropicus	SAR11.IIIb.14	67.07	66.92	66.38	67.33	66.39	66.3	66.98	66.33	66.43	66.3	66.52	66.55	66.17	66.72	66.78	67.06	66.99	66.79	66.94	67.01	66.66	66.3	66.92	67.15	66.87	66.56	66.33	65.57	66.34	67.05	66.79	66.78	66.81	66.78	66.75	66.47	66.77	66.74	66.85	67.41	66.71	67.57	67.32	67.53	67.01
231	SRR5997543_bin_19_CONCOCT_v1_1	d__Bacteria;p__Pseudomonadota;c__Alphaproteobacteria;o__Pelagibacterales;f__Pelagibacteraceae;g__Fonsibacter;s__Fonsibacter sp023257975	A. subtropicus	SAR11.IIIb.14	67.15	67.13	66.54	66.96	66.55	66.16	67.12	66.21	66.84	66.92	66.99	66.53	66.22	66.62	66.65	66.96	66.88	66.59	66.85	66.89	66.93	66.37	67.07	67.32	67.16	66.65	66.59	65.76	66.74	66.79	66.96	66.9	66.86	66.89	66.9	66.28	66.86	66.86	66.87	67.08	66.99	67.4	67.12	67.63	67.07
232	N-LaBr-23jan24-080	d__Bacteria;p__Pseudomonadota;c__Alphaproteobacteria;o__Pelagibacterales;f__Pelagibacteraceae;g__Fonsibacter;s__Fonsibacter sp023257975	A. subtropicus	SAR11.IIIb.14	67.15	67.41	66.7	67.33	66.82	66.91	67.23	66.66	67.01	67.02	67.05	67.16	66.61	67.06	67.08	67.2	67.14	66.68	67.1	67.17	67.13	66.84	67.21	67.32	67.07	67.2	66.89	66.09	66.83	66.55	67.3	67.38	66.91	67.15	66.99	66.75	67.13	67.18	67.27	67.26	67.24	67.49	67.41	67.63	67.39
233	HJW_6	d__Bacteria;p__Pseudomonadota;c__Alphaproteobacteria;o__Pelagibacterales;f__Pelagibacteraceae;g__Fonsibacter;s__Fonsibacter sp023257975	A. subtropicus	SAR11.IIIb.14	66.84	66.84	66.33	67.14	66.66	66.23	66.73	66	66.56	66.74	66.82	66.5	66.27	66.52	66.66	66.66	66.59	66.16	66.65	66.66	66.73	66.33	66.89	66.59	66.6	66.53	66.33	65.7	66.48	66.42	66.81	67.02	66.49	66.75	66.92	66.24	66.78	66.83	66.7	67.05	66.83	67.25	66.88	67.14	66.85
234	N-Balt2-05jul22-047	d__Bacteria;p__Pseudomonadota;c__Alphaproteobacteria;o__Pelagibacterales;f__Pelagibacteraceae;g__Fonsibacter;s__Fonsibacter sp947497305	A. oligotrophicus	SAR11.IIIb.15	66.85	67.18	66.49	67.03	66.51	66.18	66.7	66.33	66.76	66.35	66.55	66.57	66.19	66.66	66.56	66.68	66.62	66.46	66.74	66.74	66.63	66.45	66.8	66.83	66.62	66.5	66.44	65.71	66.62	66.46	66.77	66.65	66.55	66.65	66.69	66.61	66.4	66.47	66.92	66.61	66.62	67.09	66.92	67.33	66.92
235	ZH-13may13-13	d__Bacteria;p__Pseudomonadota;c__Alphaproteobacteria;o__Pelagibacterales;f__Pelagibacteraceae;g__Fonsibacter;s__Fonsibacter sp947497305	A. oligotrophicus	SAR11.IIIb.15	67.33	67.61	66.68	66.92	66.65	66.77	66.91	66.53	67.01	66.53	66.61	66.79	66.31	66.72	66.86	67.05	67.01	66.71	66.99	66.98	66.92	66.82	67.04	66.96	66.77	66.66	66.61	66.26	66.63	66.78	66.98	67	66.59	67.03	66.87	66.57	66.69	66.8	67.05	66.72	66.83	67.21	67.05	67.3	66.78
236	ME-04may21-LR-119	d__Bacteria;p__Pseudomonadota;c__Alphaproteobacteria;o__Pelagibacterales;f__Pelagibacteraceae;g__Fonsibacter;s__Fonsibacter sp947497305	A. oligotrophicus	SAR11.IIIb.15	66.88	67.26	66.4	67	66.62	66.29	66.61	66.11	66.46	66.19	66.49	66.61	66.19	66.48	66.62	66.85	66.73	66.4	66.8	66.73	66.6	66.6	66.51	66.86	66.9	66.53	66.42	65.57	66.43	66.48	66.73	66.59	66.58	66.61	66.61	66.56	66.24	66.53	67.05	66.45	66.61	67.17	66.9	67.5	66.99
237	MsH-30jul19-279	d__Bacteria;p__Pseudomonadota;c__Alphaproteobacteria;o__Pelagibacterales;f__Pelagibacteraceae;g__Fonsibacter;s__Fonsibacter sp947497305	A. oligotrophicus	SAR11.IIIb.15	66.69	67.28	66.29	67.65	66.81	66.7	67.38	66.41	66.41	66.75	66.74	66.67	66.73	66.71	66.76	66.68	66.71	66.11	66.71	66.72	66.97	67.32	66.56	66.45	66.26	66.84	66.76	65.74	66.89	66.34	67.07	67.06	66.66	66.87	66.95	66.64	66.54	66.74	67.01	66.32	66.68	68.09	66.75	67.58	66.96
238	MoH-23oct19-67	d__Bacteria;p__Pseudomonadota;c__Alphaproteobacteria;o__Pelagibacterales;f__Pelagibacteraceae;g__Fonsibacter;s__Fonsibacter sp947497305	A. oligotrophicus	SAR11.IIIb.15	66.88	66.83	66.27	66.5	66.36	66.39	66.76	66.1	66.45	65.77	66.23	66.37	65.88	66.29	66.43	66.55	66.5	66.21	66.47	66.58	66.45	65.91	66.68	66.66	66.52	66.37	66.24	65.46	66.34	66.24	66.5	66.54	66.16	66.41	66.22	66.3	66.17	66.47	66.42	66.49	66.17	66.59	66.78	67.32	66.63
239	MoE-02may19-143	d__Bacteria;p__Pseudomonadota;c__Alphaproteobacteria;o__Pelagibacterales;f__Pelagibacteraceae;g__Fonsibacter;s__Fonsibacter sp947497305	A. oligotrophicus	SAR11.IIIb.15	66.59	66.79	65.84	66.7	66.17	66.04	66.11	65.83	65.99	65.55	66.03	66.07	66.1	65.98	66.01	66.15	66.02	65.67	66.06	65.96	66.1	65.85	66.39	65.94	66.04	66.28	65.97	65.28	66.23	66.16	66.15	66.09	66.43	66.38	66.13	65.79	65.9	66.14	66.38	66.24	66.05	66.65	66.49	66.91	66.54
240	MaE-04nov19-36	d__Bacteria;p__Pseudomonadota;c__Alphaproteobacteria;o__Pelagibacterales;f__Pelagibacteraceae;g__Fonsibacter;s__Fonsibacter sp947497305	A. oligotrophicus	SAR11.IIIb.15	66.55	66.47	66.03	67.03	65.85	65.89	66.22	65.71	66.35	65.87	66.13	65.9	66.16	65.85	65.86	65.94	65.78	65.33	65.88	65.89	65.88	65.92	65.96	65.74	65.55	65.61	65.71	64.91	66.02	65.38	65.95	65.86	65.7	65.98	65.96	65.8	65.76	65.88	66.27	66.03	65.84	66.88	66.32	66.94	66.28
241	ZE-13nov19-LR-47	d__Bacteria;p__Pseudomonadota;c__Alphaproteobacteria;o__Pelagibacterales;f__Pelagibacteraceae;g__Fonsibacter;s__Fonsibacter sp947497305	A. oligotrophicus	SAR11.IIIb.15	66.93	67.08	66.25	66.66	66.56	66.17	66.64	66.18	66.47	66.44	66.61	66.52	66.13	66.67	66.52	66.58	66.6	66.24	66.62	66.65	66.74	66.44	66.64	66.77	66.53	66.85	66.56	65.68	66.58	66.5	66.86	66.71	66.66	66.75	66.7	66.35	66.52	66.62	66.57	66.85	66.85	67.12	67.19	67.42	66.92
242	MsE-30jul19-LR-117	d__Bacteria;p__Pseudomonadota;c__Alphaproteobacteria;o__Pelagibacterales;f__Pelagibacteraceae;g__Fonsibacter;s__Fonsibacter sp947497305	A. oligotrophicus	SAR11.IIIb.15	66.6	66.96	66.39	66.78	66.23	65.76	66.23	66.14	66.52	66.26	66.43	66.46	65.94	66.41	66.49	66.53	66.49	66.25	66.55	66.43	66.64	66.19	66.73	66.92	66.85	66.39	66.42	65.48	66.43	66.25	66.6	66.57	66.21	66.66	66.47	66.26	66.25	66.43	66.56	66.26	66.58	66.89	66.95	67.2	66.73
243	TE-08apr19-126	d__Bacteria;p__Pseudomonadota;c__Alphaproteobacteria;o__Pelagibacterales;f__Pelagibacteraceae;g__Fonsibacter;s__Fonsibacter sp947497305	A. oligotrophicus	SAR11.IIIb.15	66.82	66.74	65.98	67.1	66.19	66.23	66.17	65.93	66.22	66.27	66.27	66.41	65.91	66.25	66.45	66.49	66.44	66.11	66.6	66.47	66.5	66.42	66.55	66.6	66.35	66.31	66.31	65.42	66.69	66.28	66.5	66.48	66.3	66.43	66.37	66.09	66.22	66.33	66.63	66.23	66.31	66.81	66.63	67.21	66.33
244	MoE-23oct19-200	d__Bacteria;p__Pseudomonadota;c__Alphaproteobacteria;o__Pelagibacterales;f__Pelagibacteraceae;g__Fonsibacter;s__Fonsibacter sp947497305	A. oligotrophicus	SAR11.IIIb.15	66.59	67.01	66.17	67	66.09	66.27	66.45	65.98	66.26	65.94	66.13	66.21	66.04	66.23	66.18	66.28	66.26	65.83	66.3	66.19	66.32	65.93	66.56	66.13	66.05	66.37	66.07	65.24	66.32	66.16	66.3	66.26	65.83	66.3	66.22	65.93	66.14	66.2	66.47	66.42	65.94	66.97	66.6	66.79	66.22
245	LE-05nov19-58	d__Bacteria;p__Pseudomonadota;c__Alphaproteobacteria;o__Pelagibacterales;f__Pelagibacteraceae;g__Fonsibacter;s__Fonsibacter sp947497305	A. oligotrophicus	SAR11.IIIb.15	67.06	67.5	66.4	67.2	66.39	66.28	66.78	66.1	66.72	66.17	66.46	66.32	66.22	66.57	66.42	66.62	66.53	66.2	66.63	66.61	66.82	66.55	66.61	66.36	66.25	66.31	66.35	65.2	66.39	66.21	66.53	66.5	66.18	66.52	66.51	66.31	66.17	66.47	66.31	66.14	66.49	67.4	66.91	67.67	66.98
246	ErkenSummer-bin-6361	d__Bacteria;p__Pseudomonadota;c__Alphaproteobacteria;o__Pelagibacterales;f__Pelagibacteraceae;g__Fonsibacter;s__Fonsibacter sp947497305	A. oligotrophicus	SAR11.IIIb.15	66.79	67.19	66.42	66.55	65.9	66.37	66.78	66.21	66.65	66.11	66.21	66.19	66.08	66.38	66.51	66.49	66.55	66.26	66.6	66.57	66.52	66.1	66.64	66.95	66.54	66.41	66.37	65.56	66.4	66.78	66.58	66.5	66.64	66.74	66.54	66.31	66.55	66.6	66.79	66.66	66.8	66.95	66.95	67.22	66.68
247	ZE-17mar17-120	d__Bacteria;p__Pseudomonadota;c__Alphaproteobacteria;o__Pelagibacterales;f__Pelagibacteraceae;g__Fonsibacter;s__Fonsibacter sp947497305	A. oligotrophicus	SAR11.IIIb.15	66.53	67.17	66.3	66.95	66.17	66.37	66.55	66.11	66.42	65.94	66.25	66.31	66.09	66.35	66.33	66.35	66.44	66.22	66.45	66.32	66.43	66.11	66.39	66.68	66.6	66.31	66.18	65.55	66.29	66.01	66.49	66.4	66.55	66.41	66.35	66.07	66.21	66.29	66.63	66.17	66.2	66.71	66.67	67.13	66.39
248	TE-11nov19-176	d__Bacteria;p__Pseudomonadota;c__Alphaproteobacteria;o__Pelagibacterales;f__Pelagibacteraceae;g__Fonsibacter;s__Fonsibacter sp947497305	A. oligotrophicus	SAR11.IIIb.15	66.81	66.82	66.2	66.87	66.16	66.13	66.39	66.15	66.19	66.3	66.41	66.54	66.15	66.45	66.54	66.61	66.48	66.17	66.59	66.56	66.38	65.63	66.65	66.51	66.19	66.31	66.33	65.62	66.49	66.02	66.61	66.56	66.23	66.42	66.4	66.07	66.23	66.38	66.53	66.37	65.95	66.99	66.86	66.86	66.43
249	N-Mw14-23nov23-026	d__Bacteria;p__Pseudomonadota;c__Alphaproteobacteria;o__Pelagibacterales;f__Pelagibacteraceae;g__Fonsibacter;s__Fonsibacter sp016882185	A. communis	SAR11.IIIb.16	67	67.04	66.35	66.92	66.48	66.37	67.31	66.32	66.83	66.4	66.72	66.7	66.42	66.59	66.83	66.8	66.8	66.08	66.73	66.77	66.79	65.93	66.41	67.02	66.52	66.62	66.54	65.88	66.6	66.67	66.58	66.76	66.81	67.05	66.88	66.58	66.86	66.94	66.74	66.88	66.46	66.9	67.34	68.01	67.07
250	N-Mw13-23nov23-045	d__Bacteria;p__Pseudomonadota;c__Alphaproteobacteria;o__Pelagibacterales;f__Pelagibacteraceae;g__Fonsibacter;s__Fonsibacter sp016882185	A. communis	SAR11.IIIb.16	66.72	67.05	66.21	67.06	66.17	66.14	66.83	66.23	66.48	66.34	66.33	66.45	66.01	66.39	66.56	66.55	66.54	66.29	66.48	66.5	66.61	66.45	66.76	66.66	66.35	66.22	66.42	65.7	66.37	66.27	66.5	66.49	66.45	66.46	66.58	66.38	66.38	66.49	66.61	66.34	66.47	66.87	66.81	67.06	66.67
251	N-Mw1-16nov23-028	d__Bacteria;p__Pseudomonadota;c__Alphaproteobacteria;o__Pelagibacterales;f__Pelagibacteraceae;g__Fonsibacter;s__Fonsibacter sp016882185	A. communis	SAR11.IIIb.16	67.17	67.13	66.48	66.89	66.43	66.25	66.88	66.21	66.71	66.54	66.67	66.62	66.21	66.54	66.45	66.59	66.59	66.21	66.64	66.56	66.76	66.35	66.73	67.05	66.73	66.57	66.52	65.49	66.53	66.68	66.57	66.63	66.44	66.6	66.58	66.44	66.56	66.61	66.54	66.41	66.6	66.96	66.93	67.37	66.93
252	N-Mw8-13nov23-022	d__Bacteria;p__Pseudomonadota;c__Alphaproteobacteria;o__Pelagibacterales;f__Pelagibacteraceae;g__Fonsibacter;s__Fonsibacter sp016882185	A. communis	SAR11.IIIb.16	66.42	66.54	66.11	66.63	66.14	66.27	66.53	65.98	66.25	66.24	66.29	66.43	66.03	66.4	66.52	66.56	66.6	66.14	66.52	66.55	66.38	66.13	66.34	66.56	66.21	66.26	66.19	65.42	66.32	66.07	66.41	66.43	66.18	66.57	66.61	66.28	66.52	66.6	66.5	66.32	66.44	66.95	66.67	67.14	66.58
253	K_Offshore_40m_m1_069	d__Bacteria;p__Pseudomonadota;c__Alphaproteobacteria;o__Pelagibacterales;f__Pelagibacteraceae;g__Fonsibacter;s__Fonsibacter sp016882185	A. communis	SAR11.IIIb.16	66.95	66.99	66.32	67.06	66.49	66.67	67.3	66.38	66.65	66.54	66.81	66.69	66.2	66.61	66.63	66.69	66.56	66.26	66.71	66.71	66.76	66.57	66.84	66.89	66.57	66.49	66.65	65.4	66.61	66.81	66.67	66.75	66.19	66.63	66.73	66.68	66.33	66.68	66.68	66.6	66.66	67.54	66.83	67.51	66.74
254	N-Mw5-13nov23-050	d__Bacteria;p__Pseudomonadota;c__Alphaproteobacteria;o__Pelagibacterales;f__Pelagibacteraceae;g__Fonsibacter;s__Fonsibacter sp016882185	A. communis	SAR11.IIIb.16	66.88	66.86	66.56	66.7	67.04	67.01	67.27	66.73	66.6	66.91	66.9	66.85	66.51	66.78	66.9	66.86	66.91	66.45	66.88	66.81	66.81	67.09	66.91	66.77	66.74	67.05	66.7	66.07	66.85	66.53	66.81	66.99	66.23	66.76	66.84	66.87	66.85	66.95	66.84	66.88	67.27	67.42	66.95	67.17	66.81
255	N-Mw1-16nov23-079	d__Bacteria;p__Pseudomonadota;c__Alphaproteobacteria;o__Pelagibacterales;f__Pelagibacteraceae;g__Fonsibacter;s__Fonsibacter sp016882185	A. communis	SAR11.IIIb.16	67.04	67.41	66.6	67.11	67.08	66.88	67.26	66.7	66.84	66.87	67	67.21	66.64	67.01	67.01	67.01	67.05	66.42	66.93	67.05	67.05	66.93	66.98	67.34	67.2	67.01	66.88	66.06	66.86	66.66	66.9	67.09	66.75	66.83	66.92	67.06	66.94	66.91	67.3	66.86	67.2	67.17	67.04	67.38	67.02
256	N-Mw2-16nov23-073	d__Bacteria;p__Pseudomonadota;c__Alphaproteobacteria;o__Pelagibacterales;f__Pelagibacteraceae;g__Fonsibacter;s__Fonsibacter sp016882185	A. communis	SAR11.IIIb.16	66.98	67.03	66.39	66.98	66.59	66.34	66.92	66.3	66.64	66.78	66.86	66.95	66.49	66.76	66.74	66.88	66.81	66.28	66.84	66.76	66.82	66.68	66.72	66.82	66.43	66.71	66.68	65.55	66.59	66.65	66.77	66.83	66.43	66.68	66.82	66.72	66.77	66.9	66.82	66.75	66.8	67.37	67.16	67.24	66.8
257	N-Mw6-13nov23-029	d__Bacteria;p__Pseudomonadota;c__Alphaproteobacteria;o__Pelagibacterales;f__Pelagibacteraceae;g__Fonsibacter;s__Fonsibacter sp016882185	A. communis	SAR11.IIIb.16	67.04	67.12	66.36	66.89	66.78	66.45	67.31	66.6	66.63	66.51	66.64	66.89	66.41	66.69	66.76	66.97	66.96	66.3	66.93	66.94	66.88	66.85	66.7	66.83	66.61	66.84	66.69	65.8	67.05	66.98	66.75	66.88	66.74	67.06	66.87	66.85	66.85	66.96	66.93	66.58	66.68	67.28	67.21	67.39	67.05
258	N-Mw9-20nov23-034	d__Bacteria;p__Pseudomonadota;c__Alphaproteobacteria;o__Pelagibacterales;f__Pelagibacteraceae;g__Fonsibacter;s__Fonsibacter sp016882185	A. communis	SAR11.IIIb.16	66.89	67.03	66.39	67.24	66.64	66.48	67.22	66.56	66.77	66.88	66.71	66.84	66.44	66.65	66.95	66.93	66.81	66.29	66.88	66.84	66.85	66.58	67.07	66.88	66.61	66.62	66.7	65.77	66.77	66.58	66.75	66.85	66.57	66.74	66.84	66.84	66.66	66.87	67.05	66.43	66.66	67.42	67.09	67.41	66.84
259	N-Mw13-23nov23-098	d__Bacteria;p__Pseudomonadota;c__Alphaproteobacteria;o__Pelagibacterales;f__Pelagibacteraceae;g__Fonsibacter;s__Fonsibacter sp016882185	A. communis	SAR11.IIIb.16	67.05	67.13	66.73	66.94	67.7	67.34	67.55	66.91	66.71	67.5	67.41	67.45	66.87	67.05	67.22	67.28	67.32	66.31	67.3	67.27	67.33	67.77	67	67.16	66.86	67.52	67.07	65.83	67.35	66.82	67.27	67.4	66.36	67.43	67.45	67.2	67.55	67.57	67.69	66.98	67.64	68.1	67.13	67.13	66.94
260	N-Mw5-13nov23-012	d__Bacteria;p__Pseudomonadota;c__Alphaproteobacteria;o__Pelagibacterales;f__Pelagibacteraceae;g__Fonsibacter;s__Fonsibacter sp016882185	A. communis	SAR11.IIIb.16	66.94	67.12	66.45	67.22	66.58	66.24	66.92	66.32	66.73	66.44	66.54	66.61	66.23	66.67	66.63	66.8	66.65	66.36	66.73	66.68	66.77	66.18	66.94	67	66.55	66.51	66.52	65.63	66.51	66.67	66.71	66.81	66.66	66.65	66.69	66.4	66.38	66.55	66.66	66.63	66.61	67.04	66.91	67.1	66.67
261	N-Mw11-20nov23-012	d__Bacteria;p__Pseudomonadota;c__Alphaproteobacteria;o__Pelagibacterales;f__Pelagibacteraceae;g__Fonsibacter;s__Fonsibacter sp016882185	A. communis	SAR11.IIIb.16	66.88	67.13	66.24	67.08	66.29	66.48	66.96	66.27	66.52	66.47	66.36	66.61	66.06	66.46	66.63	66.7	66.69	66.32	66.62	66.7	66.64	66.43	66.72	66.84	66.49	66.4	66.58	65.88	66.57	66.72	66.53	66.56	66.53	66.55	66.5	66.46	66.48	66.54	66.61	66.47	66.56	66.71	66.98	67.27	66.94
262	N-Mw15-23nov23-C63	d__Bacteria;p__Pseudomonadota;c__Alphaproteobacteria;o__Pelagibacterales;f__Pelagibacteraceae;g__Fonsibacter;s__Fonsibacter sp016882185	A. communis	SAR11.IIIb.16	66.35	66.65	65.69	66.49	65.91	65.54	65.92	65.69	65.86	65.62	65.84	65.87	65.76	66.06	66.05	66.34	66.21	66.28	66.27	66.2	66.24	66.08	66.14	66.47	66.3	66.01	66.07	64.84	66.25	66.46	66.07	66.13	66.3	66.01	66.06	65.79	66.25	66.27	66.25	66.1	65.94	66.35	66.49	66.77	66.59
263	N-Mw10-20nov23-C54	d__Bacteria;p__Pseudomonadota;c__Alphaproteobacteria;o__Pelagibacterales;f__Pelagibacteraceae;g__Fonsibacter;s__Fonsibacter sp016882185	A. communis	SAR11.IIIb.16	66.23	66.64	65.73	66.57	65.59	65.67	66.05	65.71	65.87	65.83	65.91	65.95	65.94	65.99	66.13	66.13	66.14	66.15	66.03	66.06	66.17	65.99	66.4	66.52	66.18	66.01	66.02	64.94	66.35	66.25	65.9	66.03	66.55	65.98	66	65.81	66.17	66.09	66.11	65.86	65.87	66.12	66.49	66.8	66.46
264	LSUCC0530	d__Bacteria;p__Pseudomonadota;c__Alphaproteobacteria;o__Pelagibacterales;f__Pelagibacteraceae;g__Fonsibacter;s__Fonsibacter ubiquis	A. communis	SAR11.IIIb.16	66.93	66.9	66.39	67.07	66.41	66.29	67.03	66.46	66.6	66.62	66.77	66.62	66.39	66.79	66.89	66.94	66.94	66.54	66.96	66.95	66.98	66.66	67.05	67.12	66.64	66.64	66.38	65.55	66.91	66.51	66.83	66.97	66.83	66.91	66.93	66.68	66.71	66.77	66.94	66.91	66.72	67.47	67.33	67.67	67.09
265	N-BiE-22sep22-058	d__Bacteria;p__Pseudomonadota;c__Alphaproteobacteria;o__Pelagibacterales;f__Pelagibacteraceae;g__Fonsibacter;s__Fonsibacter ubiquis	A. communis	SAR11.IIIb.16	66.72	66.74	66.25	66.48	66.73	66.58	66.99	66.6	66.14	66.91	66.83	66.83	66.35	66.6	67.1	67.07	66.98	66.43	66.98	67.02	67.05	67.07	66.88	66.88	66.59	66.91	66.71	65.65	66.83	66.61	67.02	66.92	66.48	66.83	66.87	66.68	67.04	66.94	67.02	66.77	66.97	67.64	66.86	67.3	66.69
266	N-IMU-22jan24-062	d__Bacteria;p__Pseudomonadota;c__Alphaproteobacteria;o__Pelagibacterales;f__Pelagibacteraceae;g__Fonsibacter;s__Fonsibacter ubiquis	A. communis	SAR11.IIIb.16	67.05	67	66.34	67.16	66.33	66.13	66.8	66.17	66.61	66.55	66.66	66.68	66.21	66.59	66.62	66.62	66.64	66.35	66.58	66.59	66.8	66.41	66.89	66.98	66.54	66.5	66.44	65.85	66.62	66.79	66.78	66.89	66.63	66.79	66.79	66.42	66.7	66.76	66.56	66.73	66.57	67.07	67.18	67.3	66.96
267	N-SamH-20apr23-066	d__Bacteria;p__Pseudomonadota;c__Alphaproteobacteria;o__Pelagibacterales;f__Pelagibacteraceae;g__Fonsibacter;s__Fonsibacter ubiquis	A. communis	SAR11.IIIb.16	66.92	67.03	66.48	67.16	66.25	66.03	66.69	66.17	66.45	66.64	66.45	66.53	66.05	66.52	66.71	66.7	66.71	66.49	66.7	66.72	66.82	66.48	67.04	66.98	66.88	66.41	66.41	65.78	66.36	66.97	66.67	66.73	66.56	66.71	66.78	66.23	66.66	66.77	66.37	66.73	66.5	67.13	67.08	67.36	66.84
268	3300014957-4	d__Bacteria;p__Pseudomonadota;c__Alphaproteobacteria;o__Pelagibacterales;f__Pelagibacteraceae;g__Fonsibacter;s__Fonsibacter ubiquis	A. communis	SAR11.IIIb.16	67.21	67.33	66.58	67.23	66.84	66.55	67.01	66.57	66.59	66.81	66.93	66.89	66.56	66.96	67.03	67.14	67.08	66.47	67.1	67.13	67.04	66.91	67.31	67.03	66.63	66.91	66.62	65.79	66.89	67.07	67.06	66.93	66.91	67.02	66.98	66.76	67.19	67.08	66.87	66.89	66.78	67.52	67.2	67.75	67.05
269	3300014029-2	d__Bacteria;p__Pseudomonadota;c__Alphaproteobacteria;o__Pelagibacterales;f__Pelagibacteraceae;g__Fonsibacter;s__Fonsibacter ubiquis	A. communis	SAR11.IIIb.16	67.59	67.4	66.9	67.15	67.01	66.79	67.22	66.78	66.87	66.97	67.14	67.23	66.77	67.03	67.21	67.29	67.22	66.65	67.22	67.2	67.36	67.02	67.15	67.06	67.02	67.25	66.88	65.88	67.07	66.96	67.31	67.25	67.04	67.34	67.32	66.9	67.3	67.32	67.09	67.26	67.37	68.06	67.61	67.92	67.22
270	3300011984-2	d__Bacteria;p__Pseudomonadota;c__Alphaproteobacteria;o__Pelagibacterales;f__Pelagibacteraceae;g__Fonsibacter;s__Fonsibacter ubiquis	A. communis	SAR11.IIIb.16	67.56	67.33	66.92	67.16	67.01	66.79	67.26	66.75	66.84	66.99	67.14	67.25	66.8	67.03	67.23	67.31	67.23	66.65	67.2	67.21	67.33	67.02	67.13	66.92	66.99	67.29	66.87	65.85	66.97	66.94	67.31	67.23	67.07	67.4	67.33	66.89	67.29	67.25	67.08	67.26	67.39	68.03	67.61	67.93	67.17
271	N-MdE-27apr23-011	d__Bacteria;p__Pseudomonadota;c__Alphaproteobacteria;o__Pelagibacterales;f__Pelagibacteraceae;g__Fonsibacter;s__Fonsibacter ubiquis	A. communis	SAR11.IIIb.16	66.97	67.06	66.34	66.98	66.38	66.19	67.08	66.29	66.47	66.48	66.7	66.69	66.14	66.75	66.82	66.71	66.76	66.51	66.72	66.7	66.78	66.27	66.89	67.16	66.65	66.75	66.58	65.66	66.76	66.92	66.87	66.88	66.92	66.68	66.83	66.42	66.75	66.96	66.67	66.81	66.62	67.35	67.4	67.7	67.16
272	N-ChE-26sep22-010	d__Bacteria;p__Pseudomonadota;c__Alphaproteobacteria;o__Pelagibacterales;f__Pelagibacteraceae;g__Fonsibacter;s__Fonsibacter ubiquis	A. communis	SAR11.IIIb.16	66.93	66.81	66.19	66.68	66.13	65.85	66.47	66.2	66.41	66.01	66.31	66.37	65.97	66.26	66.43	66.47	66.54	66.3	66.56	66.5	66.36	66.16	66.63	67.04	66.62	66.44	66.31	65.15	66.5	66.84	66.4	66.48	66.51	66.48	66.57	66.21	66.33	66.53	66.42	66.23	66.54	66.76	66.82	67.14	66.51
273	N-BarE-26apr23-045	d__Bacteria;p__Pseudomonadota;c__Alphaproteobacteria;o__Pelagibacterales;f__Pelagibacteraceae;g__Fonsibacter;s__Fonsibacter ubiquis	A. communis	SAR11.IIIb.16	67.05	67.22	66.44	67.05	66.3	66.13	66.88	66.28	66.65	66.4	66.52	66.69	66.19	66.51	66.74	66.72	66.69	66.51	66.68	66.83	66.82	66.5	66.96	67.22	66.75	66.69	66.35	65.72	66.54	66.71	66.8	66.82	66.93	66.75	66.86	66.37	66.86	66.97	66.59	66.86	66.63	67.23	67.13	67.81	67.17
274	N-LaBr-23jan24-C92	d__Bacteria;p__Pseudomonadota;c__Alphaproteobacteria;o__Pelagibacterales;f__Pelagibacteraceae;g__Fonsibacter;s__Fonsibacter ubiquis	A. communis	SAR11.IIIb.16	66.55	66.69	66.02	66.68	66.05	65.89	66.28	65.89	66.49	65.91	66.1	66.4	65.99	66.34	66.32	66.43	66.45	66.27	66.5	66.56	66.56	66.33	66.44	66.76	66.68	66.31	66.22	65.08	66.52	66.49	66.62	66.35	66.27	66.35	66.42	66.05	66.05	66.28	66.32	66.11	66.18	66.91	66.88	66.92	66.67
275	BS14	d__Bacteria;p__Pseudomonadota;c__Alphaproteobacteria;o__Pelagibacterales;f__Pelagibacteraceae;g__Fonsibacter;s__Fonsibacter ubiquis	A. communis	SAR11.IIIb.16	67.25	67.13	66.4	67.26	66.47	66.39	66.85	66.22	66.87	66.62	66.61	66.68	66.2	66.75	66.76	66.89	66.85	66.52	66.79	66.79	66.86	66.46	67.02	67.03	66.71	66.66	66.53	65.85	66.77	66.9	66.88	66.86	66.59	66.74	66.76	66.41	66.8	66.93	66.63	66.9	67.02	67.55	67.13	67.38	66.96
276	N-SamE-20apr23-052	d__Bacteria;p__Pseudomonadota;c__Alphaproteobacteria;o__Pelagibacterales;f__Pelagibacteraceae;g__Fonsibacter;s__Fonsibacter ubiquis	A. communis	SAR11.IIIb.16	66.96	66.96	66.55	67.02	66.26	66.23	66.84	66.19	66.55	66.29	66.44	66.5	65.99	66.66	66.84	66.63	66.63	66.48	66.7	66.64	66.8	66.35	67.03	67.07	66.6	66.62	66.48	65.67	66.45	66.82	66.87	66.91	66.73	66.72	66.85	66.35	66.53	66.74	66.51	66.6	66.66	67.15	67.13	67.54	66.86
277	LBMAG_Alphaproteobacteria_epi.bin1_LD12	d__Bacteria;p__Pseudomonadota;c__Alphaproteobacteria;o__Pelagibacterales;f__Pelagibacteraceae;g__Fonsibacter;s__Fonsibacter ubiquis	A. communis	SAR11.IIIb.16	66.96	67.11	66.44	67.07	66.56	66.16	66.92	66.36	66.46	66.22	66.42	66.67	66.19	66.57	66.74	66.76	66.6	66.27	66.71	66.67	66.79	66.55	66.93	66.69	66.26	66.6	66.66	66.02	66.72	66.77	66.81	66.82	66.62	66.68	66.74	66.39	66.57	66.69	66.67	66.83	66.65	67.16	66.93	67.5	66.92
278	UBA4760	d__Bacteria;p__Pseudomonadota;c__Alphaproteobacteria;o__Pelagibacterales;f__Pelagibacteraceae;g__Fonsibacter;s__Fonsibacter ubiquis	A. communis	SAR11.IIIb.16	66.91	67	66.31	66.83	66.26	66.13	66.84	66.17	66.57	66.2	66.49	66.63	66.12	66.49	66.68	66.78	66.7	66.39	66.72	66.8	66.88	66.33	66.99	66.63	65.95	66.61	66.54	65.95	66.48	66.62	66.78	66.79	66.55	66.74	66.7	66.18	66.6	66.75	66.28	66.67	66.5	67.34	66.99	67.19	66.69
279	LaPlata-5m-b-bin-419	d__Bacteria;p__Pseudomonadota;c__Alphaproteobacteria;o__Pelagibacterales;f__Pelagibacteraceae;g__Fonsibacter;s__Fonsibacter ubiquis	A. communis	SAR11.IIIb.16	67.62	67.71	66.81	67.78	66.48	66.7	67.25	66.58	66.85	66.84	67.04	67.09	66.47	66.8	67.06	67.1	67.03	66.96	67.22	67.2	67.05	67.29	67.53	67.43	66.89	67.01	66.85	65.74	67.26	66.98	67.25	67.26	67.01	67.1	67.28	67.02	67.42	67.46	66.95	67.09	66.92	68.47	67.49	67.99	67.06
280	WBA_1A_001	d__Bacteria;p__Pseudomonadota;c__Alphaproteobacteria;o__Pelagibacterales;f__Pelagibacteraceae;g__Fonsibacter;s__Fonsibacter ubiquis	A. communis	SAR11.IIIb.16	66.84	66.92	66.1	66.87	66.2	66.03	66.56	66.11	66.32	65.69	66.2	66.42	65.89	66.43	66.53	66.56	66.51	66.16	66.53	66.55	66.65	65.92	66.77	66.66	66.29	66.46	66.36	65.44	66.65	66.25	66.72	66.63	66.23	66.44	66.51	66.26	66.43	66.53	66.53	66.74	66.56	67.03	67.02	67.06	66.71
281	WB9_1A_001	d__Bacteria;p__Pseudomonadota;c__Alphaproteobacteria;o__Pelagibacterales;f__Pelagibacteraceae;g__Fonsibacter;s__Fonsibacter ubiquis	A. communis	SAR11.IIIb.16	66.89	66.94	65.99	66.81	66.05	65.84	66.49	66.08	66.45	65.83	66.24	66.49	66.07	66.3	66.47	66.52	66.43	66.1	66.55	66.55	66.72	66.02	66.6	66.68	66.46	66.35	66.26	65.62	66.72	66.24	66.53	66.59	66.44	66.52	66.41	66.17	66.31	66.58	66.51	66.52	66.45	66.87	66.88	67.25	66.73
282	WB7_2xD_001	d__Bacteria;p__Pseudomonadota;c__Alphaproteobacteria;o__Pelagibacterales;f__Pelagibacteraceae;g__Fonsibacter;s__Fonsibacter ubiquis	A. communis	SAR11.IIIb.16	66.49	66.68	65.93	66.52	66.26	65.52	66.34	65.72	65.92	65.71	66.22	66.07	65.97	66.32	66.28	66.19	66.18	65.91	66.14	66.17	66.28	66.21	66.46	66.28	66.38	66.37	66.06	65.19	66.12	66.56	66.25	66.27	66.26	66.26	66.17	66.06	66.19	66.11	66.2	66.36	66.24	66.01	66.96	66.7	66.55
283	WB7_2xC_001	d__Bacteria;p__Pseudomonadota;c__Alphaproteobacteria;o__Pelagibacterales;f__Pelagibacteraceae;g__Fonsibacter;s__Fonsibacter ubiquis	A. communis	SAR11.IIIb.16	67.01	67.26	66.17	67.17	66.58	66.04	66.89	66.43	66.33	66.04	66.55	66.68	66.01	66.62	66.63	66.5	66.41	66.04	66.59	66.51	66.74	66.74	66.93	66.54	66.74	66.76	66.49	65.53	66.58	66.48	66.97	66.92	66.57	66.72	66.68	66.58	66.76	66.84	66.33	67.01	66.75	67.16	67.15	67.54	67.11
284	WBA_1B_001	d__Bacteria;p__Pseudomonadota;c__Alphaproteobacteria;o__Pelagibacterales;f__Pelagibacteraceae;g__Fonsibacter;s__Fonsibacter ubiquis	A. communis	SAR11.IIIb.16	66.85	66.71	66.05	66.57	66.02	65.95	66.86	66.18	66.38	65.88	66.21	66.6	66.12	66.15	66.37	66.3	66.36	65.96	66.34	66.32	66.27	65.89	66.16	66.54	66.5	66.19	66.17	65.58	66.33	66.19	66.41	66.43	66.11	66.24	66.27	66.02	66.32	66.36	66.31	66.09	66.19	67	66.82	67.15	66.68
285	WB7_2xJ_001	d__Bacteria;p__Pseudomonadota;c__Alphaproteobacteria;o__Pelagibacterales;f__Pelagibacteraceae;g__Fonsibacter;s__Fonsibacter ubiquis	A. communis	SAR11.IIIb.16	67.05	67.18	66.25	67.13	66.26	65.88	66.73	66.21	66.56	65.85	66.45	66.5	66.37	66.5	66.44	66.44	66.33	66.05	66.4	66.39	66.68	66.13	66.84	66.49	66.47	66.35	66.32	65.94	66.68	66.66	66.72	66.61	66.33	66.63	66.63	66.48	66.57	66.75	66.34	66.6	66.51	67.01	66.95	67.36	66.79
286	WB7_2xM_001	d__Bacteria;p__Pseudomonadota;c__Alphaproteobacteria;o__Pelagibacterales;f__Pelagibacteraceae;g__Fonsibacter;s__Fonsibacter ubiquis	A. communis	SAR11.IIIb.16	66.84	67	66.15	66.9	66.03	65.79	66.64	66.27	66.39	66.22	66.35	66.52	66.06	66.3	66.46	66.38	66.41	66.08	66.48	66.44	66.75	66.37	66.7	66.61	66.54	66.55	66.54	65.65	66.81	66.57	66.8	66.69	66.27	66.5	66.48	66.47	66.59	66.66	66.7	66.49	66.57	67.56	66.79	67.21	66.71
287	WB7_2xK_001	d__Bacteria;p__Pseudomonadota;c__Alphaproteobacteria;o__Pelagibacterales;f__Pelagibacteraceae;g__Fonsibacter;s__Fonsibacter ubiquis	A. communis	SAR11.IIIb.16	66.76	66.9	66.13	66.87	66.54	66.07	66.57	66.1	66.39	65.88	66.34	66.8	66.25	66.25	66.3	66.29	66.2	65.78	66.28	66.28	66.57	66.3	66.51	66.65	66.66	66.66	66.35	65.49	66.76	66.78	66.42	66.48	66.57	66.43	66.37	66.6	66.3	66.67	66.37	66.6	66.59	66.91	66.71	67.3	66.58
288	LH-05nov19-97	d__Bacteria;p__Pseudomonadota;c__Alphaproteobacteria;o__Pelagibacterales;f__Pelagibacteraceae;g__Fonsibacter;s__Fonsibacter ubiquis	A. communis	SAR11.IIIb.16	66.91	67.03	66.33	67.2	66.73	66.13	66.86	66.33	66.85	65.76	66.24	66.7	66.37	66.34	66.7	66.69	66.52	66.36	66.58	66.61	66.52	65.71	66.76	66.58	66.64	66.48	66.56	65.75	66.66	66.02	66.53	66.51	66.53	66.57	66.55	66.58	66.45	66.82	66.94	66.6	66.48	67.56	66.74	67.52	66.75
289	WB9_1B_001	d__Bacteria;p__Pseudomonadota;c__Alphaproteobacteria;o__Pelagibacterales;f__Pelagibacteraceae;g__Fonsibacter;s__Fonsibacter ubiquis	A. communis	SAR11.IIIb.16	66.86	66.66	65.99	66.78	65.95	66.02	66.53	65.87	66.31	65.66	66.1	66.3	65.85	65.97	66.17	66.36	66.31	65.97	66.27	66.32	66.34	65.99	66.68	66.62	66.38	66.36	66.17	65.53	66.61	66.2	66.35	66.46	66.09	66.38	66.22	66.12	66.3	66.44	66.11	66.3	66.33	66.92	66.78	67.04	66.6
290	WB7_2xL_001	d__Bacteria;p__Pseudomonadota;c__Alphaproteobacteria;o__Pelagibacterales;f__Pelagibacteraceae;g__Fonsibacter;s__Fonsibacter ubiquis	A. communis	SAR11.IIIb.16	66.51	66.82	65.78	66.55	66.19	65.72	66.47	66	66.47	65.68	66.25	66.12	66.14	66.29	66.3	66.34	66.31	65.94	66.33	66.35	66.49	66.08	66.48	66.35	66.47	66.44	66.14	65.26	66.4	66.47	66.58	66.48	66.26	66.48	66.47	66.2	66.23	66.48	66.3	65.98	66.5	67.33	66.79	66.92	66.73
291	WBB_3_001	d__Bacteria;p__Pseudomonadota;c__Alphaproteobacteria;o__Pelagibacterales;f__Pelagibacteraceae;g__Fonsibacter;s__Fonsibacter ubiquis	A. communis	SAR11.IIIb.16	67.57	67.12	66.88	67.38	66.91	66.29	67.08	66.62	67.08	66.46	67	66.83	66.81	67.04	67.15	67.16	67.09	66.48	67.14	67.16	67.4	66.64	67.05	67	66.86	66.85	66.97	66.4	67.04	67.01	67.25	67.19	66.71	67.11	67.11	67.01	66.9	67.05	66.74	66.93	66.8	66.87	67.61	67.23	67.18
292	LaPlata-5m-a-bin-100	d__Bacteria;p__Pseudomonadota;c__Alphaproteobacteria;o__Pelagibacterales;f__Pelagibacteraceae;g__Fonsibacter;s__Fonsibacter ubiquis	A. communis	SAR11.IIIb.16	67.2	67.29	66.53	67.36	66.74	66.03	67	66.21	66.62	66.44	66.7	66.27	66.2	66.83	66.68	67.05	67.09	66.68	66.98	66.99	66.92	66.16	67.12	66.97	66.52	66.73	66.53	65.87	66.64	66.91	66.96	67.1	66.9	66.74	66.82	66.78	67.03	66.96	67.1	66.97	66.99	67.55	67.32	67.68	66.77
293	WB7_2xN_001	d__Bacteria;p__Pseudomonadota;c__Alphaproteobacteria;o__Pelagibacterales;f__Pelagibacteraceae;g__Fonsibacter;s__Fonsibacter ubiquis	A. communis	SAR11.IIIb.16	66.77	66.65	66.04	66.7	65.86	65.42	66.5	65.84	66.07	65.65	66.13	66.24	65.69	66.03	66.09	66.13	66.16	65.77	66.13	66.23	66.33	65.84	66.26	65.99	66.04	66.1	66.01	65.04	66.34	66.29	66.27	66.13	66.24	66.17	66.25	66.02	66.18	66.28	66.06	66.5	66.43	66.93	66.79	66.85	66.25
294	WB7_2xF_001	d__Bacteria;p__Pseudomonadota;c__Alphaproteobacteria;o__Pelagibacterales;f__Pelagibacteraceae;g__Fonsibacter;s__Fonsibacter ubiquis	A. communis	SAR11.IIIb.16	66.44	66.42	65.93	66.68	66.2	65.53	66.36	65.78	65.77	65.59	65.95	66.08	65.67	65.96	66.16	66.14	66.1	65.71	66.12	66.05	65.93	65.6	66.14	66.01	65.94	65.95	65.98	65.01	66.17	65.89	66.28	66.09	66	66.09	66.22	65.95	66.12	66.29	65.8	65.96	66.3	66.72	66.55	67.11	66.28
295	LE-05nov19-195	d__Bacteria;p__Pseudomonadota;c__Alphaproteobacteria;o__Pelagibacterales;f__Pelagibacteraceae;g__Fonsibacter;s__Fonsibacter ubiquis	A. communis	SAR11.IIIb.16	66.73	66.85	66.36	67.32	66.43	66.44	67.04	66.26	66.45	65.98	66.36	66.49	66.1	66.3	66.42	66.43	66.28	65.82	66.41	66.34	66.53	66.15	66.55	66.12	66.24	66.45	66.34	65.41	66.23	66.67	66.21	66.23	66.26	66.51	66.51	66.46	66.34	66.5	66.67	66.42	66.53	67.63	66.77	67.13	66.68
296	WB7_2xI_001	d__Bacteria;p__Pseudomonadota;c__Alphaproteobacteria;o__Pelagibacterales;f__Pelagibacteraceae;g__Fonsibacter;s__Fonsibacter ubiquis	A. communis	SAR11.IIIb.16	66.89	66.8	66.11	66.91	66.2	66.1	66.63	66.24	66.56	66.21	66.39	66.52	65.93	66.29	66.51	66.36	66.34	66.06	66.26	66.4	66.42	66.05	66.54	66.51	66.3	66.1	66.23	65.73	66.28	66.27	66.64	66.51	66.34	66.53	66.47	66.16	66.55	66.53	66.46	66.4	66.67	67.57	66.79	66.98	66.69
297	WB7_2xE_001	d__Bacteria;p__Pseudomonadota;c__Alphaproteobacteria;o__Pelagibacterales;f__Pelagibacteraceae;g__Fonsibacter;s__Fonsibacter ubiquis	A. communis	SAR11.IIIb.16	66.53	66.71	65.98	66.77	66.17	65.54	66.59	65.77	66.13	65.7	66.03	66.17	65.71	65.99	66.11	66.05	66.08	65.81	66.12	66.07	66.44	66.04	66.2	66.34	66.18	65.91	66.14	65.66	66.23	65.78	66.12	66.14	66.31	66.15	66.16	66.03	66.11	66.18	66.29	66.08	66.27	66.48	66.46	66.91	66.35
298	WB7_2xH_001	d__Bacteria;p__Pseudomonadota;c__Alphaproteobacteria;o__Pelagibacterales;f__Pelagibacteraceae;g__Fonsibacter;s__Fonsibacter ubiquis	A. communis	SAR11.IIIb.16	66.46	66.59	65.8	66.61	65.72	65.39	66.15	65.74	65.79	65.43	65.67	66.01	65.43	65.93	65.97	66.03	66.01	65.77	65.99	65.98	65.89	66.02	66.08	65.81	65.85	65.68	65.9	65.05	66.18	65.89	65.97	66.01	65.98	65.8	65.95	65.74	65.77	66	65.73	66.18	66.15	66.32	66.38	66.99	66.17
299	WB7_2xA_001	d__Bacteria;p__Pseudomonadota;c__Alphaproteobacteria;o__Pelagibacterales;f__Pelagibacteraceae;g__Fonsibacter;s__Fonsibacter ubiquis	A. communis	SAR11.IIIb.16	67.17	67.09	66.34	66.88	66.17	66.1	66.65	66.28	66.44	66.23	66.53	66.4	65.98	66.38	66.51	66.64	66.53	66.34	66.59	66.63	66.74	66.16	66.8	66.7	66.46	66.62	66.18	65.47	66.59	66.54	66.59	66.45	66.59	66.76	66.72	66.2	66.47	66.5	66.68	66.78	66.42	66.97	66.92	67.36	66.8
300	WB8_2A_001	d__Bacteria;p__Pseudomonadota;c__Alphaproteobacteria;o__Pelagibacterales;f__Pelagibacteraceae;g__Fonsibacter;s__Fonsibacter ubiquis	A. communis	SAR11.IIIb.16	66.88	66.69	65.92	66.87	66.33	65.8	66.43	65.96	66.36	65.96	66.22	66.18	65.71	66.2	66.19	66.3	66.47	65.92	66.2	66.35	66.5	65.91	66.51	66.57	66.46	66.34	66.11	65.39	66.48	66.42	66.27	66.24	66.43	66.37	66.38	66.03	66.36	66.38	66.13	66.46	66.36	67.02	66.64	67	66.46
301	WB7_2xB_001	d__Bacteria;p__Pseudomonadota;c__Alphaproteobacteria;o__Pelagibacterales;f__Pelagibacteraceae;g__Fonsibacter;s__Fonsibacter ubiquis	A. communis	SAR11.IIIb.16	66.99	67.17	66.46	67.32	66.38	66.13	66.91	66.42	66.65	66.07	66.46	66.8	66.35	66.52	66.45	66.69	66.55	66.12	66.64	66.62	66.65	66.2	66.8	66.64	66.54	66.43	66.51	65.81	66.71	66.48	66.83	66.85	66.46	66.59	66.69	66.46	66.74	66.82	66.54	66.56	66.67	67.53	67.07	67.59	67.17
302	WB8_2B_001	d__Bacteria;p__Pseudomonadota;c__Alphaproteobacteria;o__Pelagibacterales;f__Pelagibacteraceae;g__Fonsibacter;s__Fonsibacter ubiquis	A. communis	SAR11.IIIb.16	66.68	66.37	65.83	66.79	65.93	65.66	66.42	65.84	66.11	65.95	66.12	66.19	65.85	66.07	66.18	66.24	66.16	66.04	66.19	66.23	66.3	66.29	66.23	66.19	66.2	65.98	66.05	65.3	66.12	65.93	66.27	66.24	66.11	66.28	66.31	65.86	66.13	66.26	66.19	66.49	66.24	66.98	66.61	66.76	66.19
303	WB7_2xG_001	d__Bacteria;p__Pseudomonadota;c__Alphaproteobacteria;o__Pelagibacterales;f__Pelagibacteraceae;g__Fonsibacter;s__Fonsibacter ubiquis	A. communis	SAR11.IIIb.16	66.76	66.6	65.97	66.72	66.04	65.78	66.63	66.04	66.41	65.53	66.06	66.18	66	66.19	66.4	66.25	66.19	65.9	66.26	66.25	66.16	65.7	66.44	66.09	66.17	65.99	66.17	65.7	66.43	66.26	66.34	66.25	66	66.2	66.35	66.06	66.4	66.41	66.28	66.36	66.45	66.81	66.61	66.96	66.38
304	LaPlata-7m-a-bin-268	d__Bacteria;p__Pseudomonadota;c__Alphaproteobacteria;o__Pelagibacterales;f__Pelagibacteraceae;g__Fonsibacter;s__Fonsibacter ubiquis	A. communis	SAR11.IIIb.16	66.89	67.26	66.58	67.46	66.71	66.44	67.24	66.53	66.81	66.51	66.68	67.08	66.58	66.84	66.93	66.97	66.94	66.62	67.06	67.04	66.98	66.85	67.15	67.03	66.64	66.79	66.62	65.94	66.89	66.93	66.95	66.87	66.86	67.09	66.9	66.7	67.05	67.04	66.83	66.92	66.63	67.46	67.19	67.74	67.31
305	SAG-MED32	d__Bacteria;p__Pseudomonadota;c__Alphaproteobacteria;o__Pelagibacterales;f__AG-422-B15;g__AG-422-B15;s__AG-422-B15 sp014653725		outgroup	65.32	65.36	65.11	66.76	65.99	66.44	66.77	66.42	64.89	67.74	66.71	67.19	66.82	66.52	66.59	66.9	66.78	66.23	66.76	66.72	66.91	67.6	66.76	67.03	66.37	67.39	67.83	66.76	67.12	68.84	67.16	67.22	66.59	67.23	67.22	68.9	67.41	67.53	67.3	67.27	67.54	69.75	66.74	67.55	66.86
306	HIMB59	d__Bacteria;p__Pseudomonadota;c__Alphaproteobacteria;o__HIMB59;f__HIMB59;g__HIMB59;s__HIMB59 sp000299115		outgroup	63.83	63.76	63.62	64.17	64.18	63.39	63.83	63.7	63.39	64.76	64.64	64.6	64.03	64.46	64.33	64.57	64.23	63.64	64.63	64.58	64.76	64.64	64.6	63.9	63.57	64.34	64.1	63.19	64.18	65.2	64.35	64.11	63.89	64.3	64.6	63.98	64.68	64.68	64.98	64.6	64.4	65.02	64.63	64.43	64.14
307	SP337	d__Bacteria;p__Pseudomonadota;c__Alphaproteobacteria;o__HIMB59;f__GCA-002718135;g__GCA-2717485;s__GCA-2717485 sp002717485		outgroup	64.38	65.54	64.84	65.33	64.57	63.98	64.33	64.11	64.81	64.59	64.61	65.11	64.55	64.52	64.69	64.74	64.56	63.94	64.65	64.78	64.63	64.36	64.69	64.04	63.71	65	64.49	63.29	64.63	64.39	64.88	64.71	64.58	64.53	64.98	64.4	64.69	64.68	65.04	65.26	64.85	65.01	64.95	65.31	64.89
308	SAG-MED31	d__Bacteria;p__Pseudomonadota;c__Alphaproteobacteria;o__HIMB59;f__GCA-002718135;g__AG-337-I02;s__AG-337-I02 sp014653715		outgroup	64.71	64.78	64.58	65.41	64.67	64.44	64.84	64.21	64.92	65.68	65.53	65.12	65.02	65.12	65.15	65.28	65.09	64.98	65.11	65.15	64.77	64.95	65.2	65	64.93	65.42	64.89	64.36	64.86	66.33	65.14	65	65.25	65.18	65.67	65.51	64.92	65.29	65.36	65.85	65.37	65.98	65.21	65.67	65.36
[truncated: 250 more columns]

## Sheet: S5_AAI
Table S5: Average amino acid identity (AAI) matrix of all genomes used in this study. SAR11 lineages I-IIIa and species IIIb.1-16 are color-coded as in Fig. 1.
	Genome_ID	MED605	MED-G108	3300020262_24	MED-G107	SCGC_AAA795-D22	SCGC_AAA795-M22	SCGC_AAA795-F16	AG-426-E17	3300027685-46	SCGC_AAA795-M18	RS40	GOM-A1	AG-470-G21	HTCC9565	P. Giovannonii	HTCC1062	HTCC1002	SFB_27D_13Oct24_20_ms_bin_5	HTCC1040	HTCC1013	HIMB5	SCGC_AAA795-C09	AG-918-P15	SFB_34D_13Oct24_05_ms_bin_2	SFB_27D_13Oct24_20_ms_bin_12	SCGC_AAA795-O20	RS39	SCGC_AAA795-L23	AG-426-G02	TMED239	HTCC7214	HTCC7211	SFB_34D_13Oct24_05_ms_bin_3	HTCC9022	HTCC8051	AG-430-E20	SCGC_AAA795-A20	HIMB083	SCGC_AAA797-I19	SCGC_AAA795-O19	SCGC_AAA795-P11	SCGC_AAA795-J21	N-LaCa2-17jan24-061	cas-50m-174	BACL5_MAG-120820-bin39	cas-150m-16	Baikal-deep-G37	Baikal-G1
1	MED605	100	66.34	63.57	64.69	60.24	60.64	61.76	61.35	62.49	61.41	61.66	61.43	60.22	62.77	62.5	63.14	63.24	63.27	63.02	63.22	61.85	60.98	62.55	62.84	62.56	62.17	62.03	59.78	62.53	61.73	62.33	61.82	62.75	62.8	62.23	62	61.43	62.06	61.7	61.96	61.87	62.02	62.85	62.94	63.34	61.55	61.27	61.19
2	MED-G108	66.34	100	66.37	63.64	60.96	60.55	61.19	60.78	63.11	61.09	61.52	61.33	60.07	61.05	60.86	61.11	61.25	60.9	61.5	61.34	60.41	59.84	61.08	61.74	61.28	61	60.91	58.75	61.25	61.68	61.28	61.14	60.62	61.06	61.04	60.83	60.95	61.11	61.09	61.3	61.03	60.65	61.76	61.46	62.06	60.16	60.56	60.35
3	3300020262_24	63.57	66.37	100	65.18	60.95	60.93	61.73	61.16	64.35	61.44	62.06	62.04	61	61.98	62.2	62.69	62.84	62.09	62.83	62.64	62.05	61.22	62.41	62.49	62.86	62.38	61.88	59.62	61.73	61.64	62.08	61.73	61.58	62.03	61.51	62.26	62.05	62.2	61.8	62.23	61.98	61.99	62.79	62.16	62.72	61.39	61.61	61.59
4	MED-G107	64.69	63.64	65.18	100	66.24	65.19	66.14	66.43	67.08	67.26	67.81	66.72	65.84	69.72	69.4	69.54	69.92	69.11	69.71	69.75	67.46	67.04	68.66	67.69	67.16	67.89	67.7	65.16	67.71	67.48	69.54	69.33	68.06	69.33	69.12	67.67	68.08	68.75	68.15	69.66	67.73	67.99	69.36	67.61	68.83	67.1	66.56	66.42
5	SCGC_AAA795-D22	60.24	60.96	60.95	66.24	100	67.09	68.15	68.08	67.74	67.34	68.91	68.28	67.88	68.04	67.77	68.04	68.04	68.24	68.37	67.84	67.78	69.51	69.23	68.56	69.12	68.28	68.93	65.84	68.72	67.8	68.54	68.14	67.88	67.91	67.05	68.16	68.35	67.67	68.14	69.79	68.69	66.96	69.22	68.34	69.13	65.89	66.07	66.45
6	SCGC_AAA795-M22	60.64	60.55	60.93	65.19	67.09	100	74.08	73.84	66.6	67.62	68.09	68.07	66.96	66.87	66.65	67.34	67.34	67.32	67.25	67.08	66.72	66.8	67.8	67.53	66.85	66.85	67.89	65.45	68.65	65.98	67.56	67.11	66.61	66.94	66.28	67.09	66.52	66.68	66.36	66.48	66.96	67.25	67.38	66.88	67.71	65.18	65.12	64.85
7	SCGC_AAA795-F16	61.76	61.19	61.73	66.14	68.15	74.08	100	84.18	67.31	68.82	68.97	68.85	67.92	67.79	67.1	67.44	67.51	67.62	68.03	67.47	67.47	67.46	68.73	68.44	68.49	68.45	69.31	66.85	68.81	67.07	68.05	67.71	66.43	67.25	66.61	68.06	66.98	67.62	67.03	68	68.38	67.61	67.78	66.71	68.63	66.01	65.72	65.6
8	AG-426-E17	61.35	60.78	61.16	66.43	68.08	73.84	84.18	100	67.06	67.73	68.34	68.28	67.69	67.37	67	67.22	67.14	67.05	67.56	67.33	66.87	67.55	68.66	67.69	66.97	67.77	68.53	66.05	68.77	66.82	67.43	67.38	66.42	66.8	66.38	67.7	66.69	67.17	67.19	67.32	67.84	67.47	67.66	67.08	68.27	65.28	65.75	65.44
9	3300027685-46	62.49	63.11	64.35	67.08	67.74	66.6	67.31	67.06	100	68.91	69.26	68.54	67.33	68.88	69.06	69.17	69.34	69.15	69.32	69.18	67.82	67.25	68.52	68.87	69.28	67.81	68.03	65.91	67.96	66.86	68.11	67.96	68.44	68.46	68.18	68.22	68.29	68.6	67.95	68.21	68.4	68.06	68.94	67.85	69.45	67.37	67.22	66.77
10	SCGC_AAA795-M18	61.41	61.09	61.44	67.26	67.34	67.62	68.82	67.73	68.91	100	95.56	74.67	73.75	68.66	67.83	68.64	68.46	68.3	69.08	68.79	69.49	68.69	69.68	68.7	68.06	69.57	70.17	68	69.9	69.06	70.77	70.44	67.47	69.19	68.62	70.4	69.89	69.79	69.12	70.34	70.17	70.12	69.72	67.81	69.99	67.47	67.52	67.48
11	RS40	61.66	61.52	62.06	67.81	68.91	68.09	68.97	68.34	69.26	95.56	100	75.05	74.17	69.32	68.79	69.43	69.44	69.55	69.72	69.52	69.83	69.38	70.28	69.73	69.53	70.22	70.76	68.34	70.45	68.75	71.6	71.09	69.32	69.83	69.77	70.5	70.24	70.66	70	70.86	70.82	70.15	70.91	69.62	70.82	68.06	67.88	67.72
12	GOM-A1	61.43	61.33	62.04	66.72	68.28	68.07	68.85	68.28	68.54	74.67	75.05	100	86.5	68.58	68.03	68.56	68.55	68.4	68.71	68.48	68.7	68.02	69.25	68.76	68.2	68.69	69.76	67.82	69.83	68.44	70.06	70.09	68.48	68.86	68.94	69.96	69.66	69.88	69.16	70.33	70.21	70.25	69.16	68.19	69.68	67.09	67.1	66.74
13	AG-470-G21	60.22	60.07	61	65.84	67.88	66.96	67.92	67.69	67.33	73.75	74.17	86.5	100	67.87	67.63	67.75	67.69	67.47	68.17	67.94	67.69	68.28	68.34	68.33	68.07	68.18	68.87	66.92	68.75	67.78	69.06	68.93	68.04	68.33	68.3	68.8	68.33	68.62	67.69	69.72	69	68.53	68.73	68.02	68.73	67.03	66.5	66.23
14	HTCC9565	62.77	61.05	61.98	69.72	68.04	66.87	67.79	67.37	68.88	68.66	69.32	68.58	67.87	100	83.99	83.32	83.57	83.8	83.29	83.36	72.44	72.8	73.5	74.41	74.34	72.97	73.02	70.25	72.86	70.91	75.63	75.22	75.22	76.01	75.07	73.79	73.19	73.61	73.28	73.47	74.06	73.06	74.36	73.11	75.2	72.56	72.05	71.84
15	P. Giovannonii	62.5	60.86	62.2	69.4	67.77	66.65	67.1	67	69.06	67.83	68.79	68.03	67.63	83.99	100	90.72	90.63	90.61	90.82	90.61	72.82	72.63	73.45	74.43	75.05	72.92	73.13	70.8	72.45	71.56	75.04	74.69	75	76.16	75.67	74.04	73.27	73.57	73.2	73.74	73.84	72.41	74.53	73.51	75.22	72.53	72.31	72.03
16	HTCC1062	63.14	61.11	62.69	69.54	68.04	67.34	67.44	67.22	69.17	68.64	69.43	68.56	67.75	83.32	90.72	100	98.11	96.33	96.61	98.13	73.83	72.78	73.98	75.23	75.5	73.67	73.44	71.25	73.1	71.6	75.06	74.72	75.9	76.75	75.97	74.19	74.22	74.55	73.56	73.98	74.19	72.93	75.47	74.13	76.35	73.7	73.03	72.71
17	HTCC1002	63.24	61.25	62.84	69.92	68.04	67.34	67.51	67.14	69.34	68.46	69.44	68.55	67.69	83.57	90.63	98.11	100	96.23	96.43	97.05	73.41	72.82	74.19	75.24	75.5	73.62	73.53	71.48	72.94	71.55	75.38	75.06	76.1	76.78	75.9	74.31	74.38	74.53	73.62	74.19	74.17	72.99	75.45	74.09	76.31	73.52	72.82	72.61
18	SFB_27D_13Oct24_20_ms_bin_5	63.27	60.9	62.09	69.11	68.24	67.32	67.62	67.05	69.15	68.3	69.55	68.4	67.47	83.8	90.61	96.33	96.23	100	96.63	96.56	73.65	72.66	73.33	74.85	75.06	73.11	73.53	71.88	73.35	71.05	75.75	74.97	75.78	76.31	75.78	73.95	73.69	74.37	74.69	73.78	73.88	72.99	75.41	73.67	76.38	72.56	73.14	72.91
19	HTCC1040	63.02	61.5	62.83	69.71	68.37	67.25	68.03	67.56	69.32	69.08	69.72	68.71	68.17	83.29	90.82	96.61	96.43	96.63	100	97.09	74.01	72.74	74	75.39	75.47	73.47	73.12	71.13	73	71.56	75.56	74.91	75.93	76.89	75.73	74.22	73.91	74.81	74.59	73.65	74.44	73.28	75.8	74.32	76.41	73.59	73.19	72.66
20	HTCC1013	63.22	61.34	62.64	69.75	67.84	67.08	67.47	67.33	69.18	68.79	69.52	68.48	67.94	83.36	90.61	98.13	97.05	96.56	97.09	100	73.81	72.86	74.14	75.23	75.49	73.78	73.47	71.29	73.03	71.25	75.3	74.84	75.86	76.59	75.81	74.35	74.16	74.58	73.99	74.22	74.52	73.34	75.64	73.91	76.39	73.55	73.22	72.64
21	HIMB5	61.85	60.41	62.05	67.46	67.78	66.72	67.47	66.87	67.82	69.49	69.83	68.7	67.69	72.44	72.82	73.83	73.41	73.65	74.01	73.81	100	74.53	75.45	76.95	77.17	74.8	74.81	71.94	74.89	70.78	74.72	74.5	75.77	75.08	74.36	74.66	74.65	75.32	74.91	74.52	75.38	74.28	76.03	74.15	76.29	73.25	72.97	72.75
22	SCGC_AAA795-C09	60.98	59.84	61.22	67.04	69.51	66.8	67.46	67.55	67.25	68.69	69.38	68.02	68.28	72.8	72.63	72.78	72.82	72.66	72.74	72.86	74.53	100	79.64	76.34	76.53	78.83	78.81	75.99	80.8	71.93	76.19	75.66	75.96	75.65	74.94	75.25	76.92	76.45	75.65	76.29	76.22	75.54	74.97	73.29	75.89	72.48	73.19	71.86
23	AG-918-P15	62.55	61.08	62.41	68.66	69.23	67.8	68.73	68.66	68.52	69.68	70.28	69.25	68.34	73.5	73.45	73.98	74.19	73.33	74	74.14	75.45	79.64	100	79.7	79.22	81.84	79.53	76.62	79.12	72.85	77.09	76.8	76.72	76.47	75.76	76.19	76.07	76.44	76	76.4	76.31	76.32	75.54	74.28	76.15	72.66	72.85	72.8
24	SFB_34D_13Oct24_05_ms_bin_2	62.84	61.74	62.49	67.69	68.56	67.53	68.44	67.69	68.87	68.7	69.73	68.76	68.33	74.41	74.43	75.23	75.24	74.85	75.39	75.23	76.95	76.34	79.7	100	95.78	78.94	76.69	75.03	76.22	72.67	76.94	76.98	77.31	77.56	76.95	76.8	76.41	76.81	76.63	76.25	76.95	76.88	77.74	77.56	78.14	75.25	75.09	75.1
25	SFB_27D_13Oct24_20_ms_bin_12	62.56	61.28	62.86	67.16	69.12	66.85	68.49	66.97	69.28	68.06	69.53	68.2	68.07	74.34	75.05	75.5	75.5	75.06	75.47	75.49	77.17	76.53	79.22	95.78	100	78.85	76.84	74.88	76.39	72.38	78.55	78.28	82.5	80.35	78.84	77.08	77.34	77.82	77.25	77.35	77.72	76.16	77.71	77.33	78.19	76.19	75.5	75.35
26	SCGC_AAA795-O20	62.17	61	62.38	67.89	68.28	66.85	68.45	67.77	67.81	69.57	70.22	68.69	68.18	72.97	72.92	73.67	73.62	73.11	73.47	73.78	74.8	78.83	81.84	78.94	78.85	100	79.41	75.93	78.12	73.09	76.42	76.01	76.26	76.41	75.41	75.69	76.02	76.25	76.14	76	77.04	75.9	75.12	72.88	75.92	72.38	72.78	72.28
27	RS39	62.03	60.91	61.88	67.7	68.93	67.89	69.31	68.53	68.03	70.17	70.76	69.76	68.87	73.02	73.13	73.44	73.53	73.53	73.12	73.47	74.81	78.81	79.53	76.69	76.84	79.41	100	78.44	81.03	73.58	76.44	75.75	75.97	75.78	74.78	75.67	75.48	76.07	75.5	75.94	76.88	75.38	75.19	73.59	75.94	73.09	72.72	72.37
28	SCGC_AAA795-L23	59.78	58.75	59.62	65.16	65.84	65.45	66.85	66.05	65.91	68	68.34	67.82	66.92	70.25	70.8	71.25	71.48	71.88	71.13	71.29	71.94	75.99	76.62	75.03	74.88	75.93	78.44	100	78.17	72.07	74.16	74.11	73.69	73.28	73.3	74.15	73.96	73.44	72.34	73.87	74.69	72.97	72.78	72.79	74.57	71.47	71.19	70.56
29	AG-426-G02	62.53	61.25	61.73	67.71	68.72	68.65	68.81	68.77	67.96	69.9	70.45	69.83	68.75	72.86	72.45	73.1	72.94	73.35	73	73.03	74.89	80.8	79.12	76.22	76.39	78.12	81.03	78.17	100	72.83	75.99	75.23	75.56	74.86	74.84	75.75	75.06	75.59	74.45	75.34	75.97	75.04	75.31	73.48	75.44	73.09	72.58	72.42
30	TMED239	61.73	61.68	61.64	67.48	67.8	65.98	67.07	66.82	66.86	69.06	68.75	68.44	67.78	70.91	71.56	71.6	71.55	71.05	71.56	71.25	70.78	71.93	72.85	72.67	72.38	73.09	73.58	72.07	72.83	100	74.86	74.48	74.37	75.03	74.4	74.1	75.25	74.73	74.08	75.35	74.23	74.34	72.11	69.48	72.51	70.15	71.74	71.52
31	HTCC7214	62.33	61.28	62.08	69.54	68.54	67.56	68.05	67.43	68.11	70.77	71.6	70.06	69.06	75.63	75.04	75.06	75.38	75.75	75.56	75.3	74.72	76.19	77.09	76.94	78.55	76.42	76.44	74.16	75.99	74.86	100	93.55	82.88	83.09	82.95	79.89	79.87	80.13	79.2	80.56	80.1	79.66	76.72	75.76	78.12	76.16	74.65	74.65
32	HTCC7211	61.82	61.14	61.73	69.33	68.14	67.11	67.71	67.38	67.96	70.44	71.09	70.09	68.93	75.22	74.69	74.72	75.06	74.97	74.91	74.84	74.5	75.66	76.8	76.98	78.28	76.01	75.75	74.11	75.23	74.48	93.55	100	82.6	82.59	82.2	80.1	79.53	79.39	78.79	79.97	79.65	78.8	76.22	75.43	77.61	75.34	74.41	74.32
33	SFB_34D_13Oct24_05_ms_bin_3	62.75	60.62	61.58	68.06	67.88	66.61	66.43	66.42	68.44	67.47	69.32	68.48	68.04	75.22	75	75.9	76.1	75.78	75.93	75.86	75.77	75.96	76.72	77.31	82.5	76.26	75.97	73.69	75.56	74.37	82.88	82.6	100	88.14	87.29	79.39	80.81	81.19	80.59	80.22	80.04	79.91	77.29	75.73	77.78	75.45	75.59	75.41
34	HTCC9022	62.8	61.06	62.03	69.33	67.91	66.94	67.25	66.8	68.46	69.19	69.83	68.86	68.33	76.01	76.16	76.75	76.78	76.31	76.89	76.59	75.08	75.65	76.47	77.56	80.35	76.41	75.78	73.28	74.86	75.03	83.09	82.59	88.14	100	87.68	79.7	80.58	80.67	79.31	79.62	80.66	80.35	77.36	75.89	78.18	76.34	75.95	75.16
35	HTCC8051	62.23	61.04	61.51	69.12	67.05	66.28	66.61	66.38	68.18	68.62	69.77	68.94	68.3	75.07	75.67	75.97	75.9	75.78	75.73	75.81	74.36	74.94	75.76	76.95	78.84	75.41	74.78	73.3	74.84	74.4	82.95	82.2	87.29	87.68	100	79.38	80.33	80.53	79.05	79.8	80.91	80.86	76.59	75.47	77.56	75.83	75.35	74.96
36	AG-430-E20	62	60.83	62.26	67.67	68.16	67.09	68.06	67.7	68.22	70.4	70.5	69.96	68.8	73.79	74.04	74.19	74.31	73.95	74.22	74.35	74.66	75.25	76.19	76.8	77.08	75.69	75.67	74.15	75.75	74.1	79.89	80.1	79.39	79.7	79.38	100	80.37	80.58	80.23	81.37	81.73	80.07	75.64	75.28	76.78	73.69	74.31	73.81
37	SCGC_AAA795-A20	61.43	60.95	62.05	68.08	68.35	66.52	66.98	66.69	68.29	69.89	70.24	69.66	68.33	73.19	73.27	74.22	74.38	73.69	73.91	74.16	74.65	76.92	76.07	76.41	77.34	76.02	75.48	73.96	75.06	75.25	79.87	79.53	80.81	80.58	80.33	80.37	100	95.85	81.76	89.65	89	88.57	75.63	74.65	76.55	74.04	73.77	73.32
38	HIMB083	62.06	61.11	62.2	68.75	67.67	66.68	67.62	67.17	68.6	69.79	70.66	69.88	68.62	73.61	73.57	74.55	74.53	74.37	74.81	74.58	75.32	76.45	76.44	76.81	77.82	76.25	76.07	73.44	75.59	74.73	80.13	79.39	81.19	80.67	80.53	80.58	95.85	100	83.22	90.1	89.23	89.06	76.55	74.78	77.11	74.84	74.19	73.87
39	SCGC_AAA797-I19	61.7	61.09	61.8	68.15	68.14	66.36	67.03	67.19	67.95	69.12	70	69.16	67.69	73.28	73.2	73.56	73.62	74.69	74.59	73.99	74.91	75.65	76	76.63	77.25	76.14	75.5	72.34	74.45	74.08	79.2	78.79	80.59	79.31	79.05	80.23	81.76	83.22	100	83.35	82.95	82.23	76.19	74.31	76.81	73.44	74.1	73.86
40	SCGC_AAA795-O19	61.96	61.3	62.23	69.66	69.79	66.48	68	67.32	68.21	70.34	70.86	70.33	69.72	73.47	73.74	73.98	74.19	73.78	73.65	74.22	74.52	76.29	76.4	76.25	77.35	76	75.94	73.87	75.34	75.35	80.56	79.97	80.22	79.62	79.8	81.37	89.65	90.1	83.35	100	91.84	90.38	76.4	74.14	75.78	73.68	73.94	73.49
41	SCGC_AAA795-P11	61.87	61.03	61.98	67.73	68.69	66.96	68.38	67.84	68.4	70.17	70.82	70.21	69	74.06	73.84	74.19	74.17	73.88	74.44	74.52	75.38	76.22	76.31	76.95	77.72	77.04	76.88	74.69	75.97	74.23	80.1	79.65	80.04	80.66	80.91	81.73	89	89.23	82.95	91.84	100	90.42	75.85	74.11	76.7	75.03	74.65	74.75
42	SCGC_AAA795-J21	62.02	60.65	61.99	67.99	66.96	67.25	67.61	67.47	68.06	70.12	70.15	70.25	68.53	73.06	72.41	72.93	72.99	72.99	73.28	73.34	74.28	75.54	76.32	76.88	76.16	75.9	75.38	72.97	75.04	74.34	79.66	78.8	79.91	80.35	80.86	80.07	88.57	89.06	82.23	90.38	90.42	100	74.97	73.33	76.17	74.09	73.09	72.91
43	N-LaCa2-17jan24-061	62.85	61.76	62.79	69.36	69.22	67.38	67.78	67.66	68.94	69.72	70.91	69.16	68.73	74.36	74.53	75.47	75.45	75.41	75.8	75.64	76.03	74.97	75.54	77.74	77.71	75.12	75.19	72.78	75.31	72.11	76.72	76.22	77.29	77.36	76.59	75.64	75.63	76.55	76.19	76.4	75.85	74.97	100	88.52	91.89	76.5	76.03	75.38
44	cas-50m-174	62.94	61.46	62.16	67.61	68.34	66.88	66.71	67.08	67.85	67.81	69.62	68.19	68.02	73.11	73.51	74.13	74.09	73.67	74.32	73.91	74.15	73.29	74.28	77.56	77.33	72.88	73.59	72.79	73.48	69.48	75.76	75.43	75.73	75.89	75.47	75.28	74.65	74.78	74.31	74.14	74.11	73.33	88.52	100	92.79	75.06	75.3	75.52
45	BACL5_MAG-120820-bin39	63.34	62.06	62.72	68.83	69.13	67.71	68.63	68.27	69.45	69.99	70.82	69.68	68.73	75.2	75.22	76.35	76.31	76.38	76.41	76.39	76.29	75.89	76.15	78.14	78.19	75.92	75.94	74.57	75.44	72.51	78.12	77.61	77.78	78.18	77.56	76.78	76.55	77.11	76.81	75.78	76.7	76.17	91.89	92.79	100	76.62	77.16	76.56
46	cas-150m-16	61.55	60.16	61.39	67.1	65.89	65.18	66.01	65.28	67.37	67.47	68.06	67.09	67.03	72.56	72.53	73.7	73.52	72.56	73.59	73.55	73.25	72.48	72.66	75.25	76.19	72.38	73.09	71.47	73.09	70.15	76.16	75.34	75.45	76.34	75.83	73.69	74.04	74.84	73.44	73.68	75.03	74.09	76.5	75.06	76.62	100	87.05	86.8
47	Baikal-deep-G37	61.27	60.56	61.61	66.56	66.07	65.12	65.72	65.75	67.22	67.52	67.88	67.1	66.5	72.05	72.31	73.03	72.82	73.14	73.19	73.22	72.97	73.19	72.85	75.09	75.5	72.78	72.72	71.19	72.58	71.74	74.65	74.41	75.59	75.95	75.35	74.31	73.77	74.19	74.1	73.94	74.65	73.09	76.03	75.3	77.16	87.05	100	97.83
48	Baikal-G1	61.19	60.35	61.59	66.42	66.45	64.85	65.6	65.44	66.77	67.48	67.72	66.74	66.23	71.84	72.03	72.71	72.61	72.91	72.66	72.64	72.75	71.86	72.8	75.1	75.35	72.28	72.37	70.56	72.42	71.52	74.65	74.32	75.41	75.16	74.96	73.81	73.32	73.87	73.86	73.49	74.75	72.91	75.38	75.52	76.56	86.8	97.83	100
49	N-Mw9-20nov23-020	61.7	60.45	61.56	67	66.81	65.49	66.34	65.86	67.05	67.16	67.78	67.09	66.55	71.78	72.14	72.64	72.56	72.66	72.85	72.7	72.89	72.55	73.08	74.63	74.72	72.59	72.59	71.3	72.39	70.96	74.51	74.14	74.75	75.13	74.81	74.03	73.61	73.94	73.3	73.5	74.24	72.95	75.18	74.57	76.11	84.65	90.54	89.61
50	N-Mw8-13nov23-009	61.04	60.56	61.41	66.5	66.45	65.24	65.84	65.69	67.06	67.33	67.59	66.91	66.08	71.37	71.71	72.29	72.2	72.3	72.43	72.42	72.4	72.22	72.47	74.19	74.32	72.21	72	70.78	71.94	71.07	73.88	73.36	74.34	74.72	74.15	73.36	73	73.46	72.84	73.14	73.46	72.55	74.83	74.47	75.83	84.03	89.47	88.84
51	N-Mw5-13nov23-008	61.11	60.45	61.45	66.93	66.66	65.3	65.98	65.73	67.03	67.32	67.83	67.09	66.32	71.67	72.07	72.68	72.61	72.69	72.91	72.73	72.89	72.61	72.99	74.75	74.84	72.66	72.52	71.14	72.57	71.1	74.62	74.23	74.82	75.26	74.81	73.96	73.53	73.94	73.27	73.42	74.22	73.16	75.36	74.79	76.26	84.73	90.64	89.91
52	N-Mw14-23nov23-016	61.31	60.47	61.39	66.81	66.46	65.07	65.82	65.58	66.75	67.03	67.65	66.91	66.25	71.32	71.87	72.41	72.39	72.42	72.64	72.48	72.74	72.17	72.82	74.62	74.77	72.4	72.28	70.66	72.16	70.91	74.34	73.87	74.84	74.97	74.49	73.72	73.45	73.77	73.03	73.15	73.71	72.84	75.2	74.53	75.98	84.66	90.48	89.58
53	N-Mw10-20nov23-014	61.31	60.44	61.43	66.87	66.45	65.35	66.15	65.71	66.86	67.39	67.77	67.09	66.42	71.54	71.87	72.56	72.61	72.51	72.84	72.56	72.76	72.41	72.91	74.68	74.72	72.52	72.41	70.97	72.31	71.07	74.38	74.16	74.6	75.22	74.66	73.88	73.62	73.94	73.25	73.36	74.02	72.85	75.11	74.51	76.1	84.28	90.36	89.47
54	N-Mw13-23nov23-053	61.22	60.62	61.17	66.84	66.82	65.28	66.02	65.73	66.88	66.88	67.62	66.89	66.17	71.58	72.02	72.45	72.39	72.44	72.63	72.54	72.68	72.27	72.86	74.55	74.79	72.29	72.38	70.96	72.22	70.85	74.5	74.15	74.81	74.96	74.59	73.59	73.45	73.75	73.19	73.43	73.84	72.91	74.9	74.23	75.97	84.78	90.57	89.62
55	N-Mw1-16nov23-027	61.64	60.69	61.67	67.11	67.03	65.5	66.3	66	67.14	67.39	67.86	67.25	66.61	71.94	72.29	72.83	72.85	72.62	72.99	72.84	73.12	72.83	73.16	74.7	74.81	72.78	72.75	71.42	72.59	71.13	74.77	74.43	74.83	75.35	74.98	74.09	73.82	74.15	73.56	73.64	74.5	73.31	75.34	74.63	76.23	84.8	90.87	90.03
56	N-Mw6-13nov23-020	61.16	60.29	61.4	66.78	66.73	65.09	66.03	65.77	66.86	67.19	67.59	66.97	66.41	71.32	71.82	72.44	72.51	72.51	72.71	72.54	72.74	72.49	72.89	74.69	74.82	72.44	72.44	70.97	72.24	70.74	74.31	74.09	74.82	75.09	74.57	73.78	73.48	73.75	73.07	73.52	74.11	72.91	75.12	74.56	76.08	84.69	90.44	89.47
57	N-Mw2-16nov23-014	61.61	60.64	61.56	67.14	67.05	65.53	66.19	65.94	67.05	67.4	67.82	67.28	66.62	71.89	72.24	72.85	72.84	72.61	72.98	72.83	73.06	72.84	73.11	74.72	74.86	72.81	72.69	71.4	72.67	71.2	74.77	74.29	74.87	75.35	74.88	74.07	73.8	74.15	73.55	73.72	74.54	73.11	75.31	74.61	76.21	84.78	90.82	89.97
58	N-Mw7-13nov23-016	61.55	60.62	61.58	67.09	66.88	65.49	66.29	65.94	67.11	67.36	67.85	67.18	66.57	71.73	72.11	72.76	72.78	72.62	72.88	72.74	73.06	72.75	73.1	74.77	74.91	72.86	72.74	71.26	72.54	70.97	74.72	74.46	74.75	75.34	74.85	74.16	73.78	74.06	73.41	73.53	74.22	73.29	75.32	74.75	76.19	84.58	90.77	89.78
59	N-Mw15-23nov23-031	60.27	60.25	60.92	66.37	66.1	64.55	65.56	65.52	66.66	66.69	67.04	66.28	65.84	70.78	70.93	71.9	71.89	72.41	72.25	72.11	72.18	71.95	72.38	74.59	74.84	71.98	71.75	70.27	71.81	70.55	73.69	73.16	74.87	74.77	74.12	73.18	73.11	73.41	72.74	73.16	73.66	72.11	74.78	74.58	75.97	84.28	89.34	89.24
60	N-Mw11-20nov23-023	61.45	60.58	61.56	67	66.63	65.25	66.15	65.73	66.97	67.15	67.72	67.1	66.34	71.6	72.02	72.72	72.66	72.54	72.88	72.69	72.81	72.65	72.88	74.8	74.89	72.78	72.63	70.99	72.56	71.22	74.56	74.17	74.8	75.03	74.76	74	73.57	73.85	73.27	73.39	74.31	73.32	75.19	74.58	76.06	84.52	90.65	89.62
62	MED-G40	61.66	62.99	61.48	61.45	59.61	59.88	61.22	60.13	60.52	59.03	60.03	60.52	59.73	60.48	60.04	60.29	60.41	59.83	60.49	60.3	60.02	59.47	60.92	60.21	59.8	60.59	60.32	57.23	60.95	61.39	60.16	60.22	60.09	60.19	59.45	59.75	59.44	60.09	60.21	59.72	60.17	59.8	60.76	60.95	60.52	59.86	59.01	58.99
63	N-LaRo1-16jan24-084	60.7	60.59	59.89	60	58.79	59.06	59.25	59.02	59.08	59.36	59.29	59.06	58.53	58.97	59.17	59.47	59.39	59.38	59.68	59.5	59.9	57.89	60.09	60.2	59.83	59.11	59.3	57.84	59.53	59.19	59.08	59.28	59.45	59.75	59.57	59.78	59.41	59.64	59.09	58.33	59.01	59.12	60.55	67.46	60.2	60.27	59.47	59.41
64	N-Balt4-05jul22-028	60.47	60.34	59.76	59.81	57.59	58.38	58.36	58.16	58.3	58.64	58.88	58.39	57.83	58.16	58.64	59.11	58.83	58.9	59.06	59.06	58.83	56.98	59.66	59.75	59.7	58.1	58.8	56.79	59.05	57.59	58.91	58.95	58.87	59.05	59.09	59.27	58.69	58.74	58.24	57.87	59.02	58.05	60.38	66.8	60	59.92	58.62	58.37
65	TrH-25oct19-165	60.05	60.84	59.93	59.45	58.39	58.52	58.59	58.43	58.65	58.12	58.79	59.01	58.16	58.77	58.69	59.02	59.03	58.77	59.22	59.03	59.06	57.16	59.45	59.68	59.37	58.73	58.84	56.89	59.16	58.88	58.85	58.64	59.19	59.08	59.23	59.03	58.97	59.17	58.46	57.88	59.09	58.98	60.36	63.35	59.84	61.09	60.09	60.83
[truncated: 231 more rows]
[truncated: 247 more columns]

## Sheet: S6_Global_recruitment
Table S6: Metagenomic fragment recruitment results for 16 Allofontibacter species. Subsampled metagenomes (20 mio reads) from six continents (n=620) were used for mapping.
[truncated: 624 more rows]

[truncated: 8 more sheets: S7_Seasonal_recruitment, S8_Physico_chemical_data, S9_Seasonal_stats, S10_Media, S11_Growth_experiments, S12-13_Growth_stats, S14_Metabolism_overview_Cult., S15_KEGG_Annotations]
